# Supplementary material
Source: publisher figshare collection journal article supplement (https://diabetesjournals.figshare.com/articles/dataset/_/21035914)
Supplement: Supplementary file 1 [file 1]

## Sheet: A - dbLSD1i_vs_dbVeh
gene_id	locus	sample_1	sample_2	status	value_1	value_2	log2(fold_change)	p_value_dbLSD1i_vs_dbVeh
Spp1	chr5:104864129-104870072	dbveh	dbLSDi	OK	1216.53	200.805	-2.59891	5e-05
Hba-a1_dup1	chr11:32183671-32184493	dbveh	dbLSDi	OK	1203.06	2943.28	1.29071	5e-05
Hba-a1_dup2	chr11:32196488-32197310	dbveh	dbLSDi	OK	712.938	1787.44	1.32605	5e-05
Apoa2	chr1:173155184-173156510	dbveh	dbLSDi	OK	657.241	35.887	-4.19489	5e-05
Mgp	chr6:136820955-136824326	dbveh	dbLSDi	OK	489.71	215.935	-1.18133	5e-05
Postn	chr3:54165028-54194963	dbveh	dbLSDi	OK	344.782	105.093	-1.71401	5e-05
Cfd	chr10:79353597-79355401	dbveh	dbLSDi	OK	255.706	1115.44	2.12505	5e-05
Mest	chr6:30688062-30846760	dbveh	dbLSDi	OK	192.586	556.042	1.52969	5e-05
Retnla	chr16:48842664-48844574	dbveh	dbLSDi	OK	154.555	381.989	1.30541	5e-05
Fabp1	chr6:71149881-71155017	dbveh	dbLSDi	OK	138.365	10.1619	-3.76724	5e-05
Lum	chr10:97028134-97035337	dbveh	dbLSDi	OK	128.956	58.0806	-1.15075	5e-05
Bhmt	chr13:94386845-94407713	dbveh	dbLSDi	OK	121.691	6.01933	-4.33747	5e-05
Arg1	chr10:24635012-24647276	dbveh	dbLSDi	OK	120.35	28.9587	-2.05517	5e-05
Adam8	chr7:147164839-147178387	dbveh	dbLSDi	OK	117.986	47.2403	-1.32052	5e-05
Apoa1	chr9:46036712-46038549	dbveh	dbLSDi	OK	116.968	10.9354	-3.41903	5e-05
Ttr	chr18:20823750-20832827	dbveh	dbLSDi	OK	116.444	5.72773	-4.34552	5e-05
Ahsg	chr16:22892114-22899511	dbveh	dbLSDi	OK	107.617	7.04289	-3.93359	5e-05
Emr1	chr17:57498108-57622952	dbveh	dbLSDi	OK	100.732	40.2888	-1.32207	5e-05
S100a8	chr3:90472992-90473956	dbveh	dbLSDi	OK	92.3454	349.904	1.92185	5e-05
Aldob	chr4:49548866-49562355	dbveh	dbLSDi	OK	91.9631	5.37625	-4.09638	5e-05
Serpina3k	chr12:105576695-105583949	dbveh	dbLSDi	OK	85.1427	8.56722	-3.31298	5e-05
Dab2	chr15:6249788-6390709	dbveh	dbLSDi	OK	84.4372	40.1986	-1.07073	5e-05
Serpina1b	chr12:104966365-104976399	dbveh	dbLSDi	OK	80.7624	4.99083	-4.01633	5e-05
Il1rn	chr2:24192379-24207011	dbveh	dbLSDi	OK	76.9234	24.777	-1.63442	5e-05
Ms4a6d	chr19:11661095-11679294	dbveh	dbLSDi	OK	71.9214	30.0261	-1.26021	5e-05
Mat1a	chr14:41918669-41937701	dbveh	dbLSDi	OK	67.8517	2.90313	-4.5467	5e-05
Cyp4a10	chr4:115190891-115206254	dbveh	dbLSDi	OK	67.3439	1.94574	-5.11316	5e-05
Lcn2	chr2:32240156-32243259	dbveh	dbLSDi	OK	66.1426	219.825	1.7327	5e-05
Hexb	chr13:97907891-97968312	dbveh	dbLSDi	OK	66.0981	26.665	-1.30966	5e-05
Ass1	chr2:31325789-31376190	dbveh	dbLSDi	OK	63.9318	11.4062	-2.48672	5e-05
Gnmt	chr17:46862612-46866114	dbveh	dbLSDi	OK	62.9597	3.2327	-4.28362	5e-05
Qpct	chr17:79451245-79489583	dbveh	dbLSDi	OK	54.7037	19.5248	-1.48633	5e-05
Igfbp3	chr11:7106095-7113926	dbveh	dbLSDi	OK	53.0336	137.648	1.37601	5e-05
Saa3	chr7:53967367-53971046	dbveh	dbLSDi	OK	52.8529	190.026	1.84614	5e-05
Cyp4a14	chr4:115158804-115168746	dbveh	dbLSDi	OK	52.5888	1.40564	-5.22546	5e-05
Pmepa1	chr2:173049965-173102034	dbveh	dbLSDi	OK	50.5073	141.988	1.4912	5e-05
Gc	chr5:89846535-89886923	dbveh	dbLSDi	OK	48.1881	2.32856	-4.37117	5e-05
Fgg	chr3:82811817-82818971	dbveh	dbLSDi	OK	46.6235	1.83593	-4.66647	5e-05
Col6a3	chr1:92663434-92740548	dbveh	dbLSDi	OK	44.7586	16.9735	-1.39888	5e-05
Serpina1d	chr12:105001796-105011843	dbveh	dbLSDi	OK	43.5451	2.41019	-4.17529	5e-05
Fgb	chr3:82846226-82853712	dbveh	dbLSDi	OK	42.8562	1.79451	-4.57785	5e-05
Vtn	chr11:78312621-78315827	dbveh	dbLSDi	OK	41.882	11.0341	-1.92436	5e-05
Cmklr1	chr5:114062363-114100399	dbveh	dbLSDi	OK	41.0094	97.2254	1.24538	5e-05
Myo1e	chr9:70055156-70247874	dbveh	dbLSDi	OK	39.1758	16.3384	-1.2617	5e-05
Azgp1	chr5:138422748-138431460	dbveh	dbLSDi	OK	38.3215	2.18037	-4.13551	5e-05
Loxl2	chr14:70009282-70095641	dbveh	dbLSDi	OK	37.7953	15.7221	-1.26541	5e-05
Chst1	chr2:92439863-92455409	dbveh	dbLSDi	OK	37.0674	89.6945	1.27487	5e-05
Cyp3a11	chr5:146666182-146691430	dbveh	dbLSDi	OK	36.6731	2.16456	-4.08258	5e-05
Unc119	chr11:78157023-78162658	dbveh	dbLSDi	OK	34.1424	77.7028	1.1864	5e-05
Slc25a47	chr12:110089338-110095025	dbveh	dbLSDi	OK	33.9773	3.01055	-3.49647	5e-05
Alas2	chrX:146981959-147005165	dbveh	dbLSDi	OK	33.5158	101.209	1.59442	5e-05
Slc27a2	chr2:126378759-126413979	dbveh	dbLSDi	OK	32.5946	2.36407	-3.78529	5e-05
Fga	chr3:82830074-82837539	dbveh	dbLSDi	OK	31.2487	1.01559	-4.9434	5e-05
Wisp2	chr2:163646569-163658883	dbveh	dbLSDi	OK	29.8636	120.32	2.01042	5e-05
Gstm5	chr3:107680147-107701603	dbveh	dbLSDi	OK	27.9507	92.7262	1.73009	5e-05
Fyb	chr15:6529870-6613312	dbveh	dbLSDi	OK	27.8519	11.5758	-1.26667	5e-05
Serpinc1	chr1:162908736-162933145	dbveh	dbLSDi	OK	27.2376	1.21258	-4.48945	5e-05
Peg3	chr7:6658670-6683130	dbveh	dbLSDi	OK	27.1165	82.2109	1.60016	5e-05
Ambp	chr4:62804312-62815176	dbveh	dbLSDi	OK	25.8076	1.50583	-4.09916	5e-05
Fbn1	chr2:125126329-125332174	dbveh	dbLSDi	OK	25.0964	12.1849	-1.04238	5e-05
Bpgm	chr6:34426355-34455610	dbveh	dbLSDi	OK	24.8675	58.0608	1.2233	5e-05
Hrg	chr16:22951144-22961732	dbveh	dbLSDi	OK	24.1647	1.37734	-4.13295	5e-05
Adcy7	chr8:90796301-90853861	dbveh	dbLSDi	OK	24.0866	11.3083	-1.09085	5e-05
Plg	chr17:12571474-12612250	dbveh	dbLSDi	OK	22.0286	0.988407	-4.47813	5e-05
Rgn	chrX:20126943-20139213	dbveh	dbLSDi	OK	21.4697	0.943148	-4.50868	5e-05
Slc36a2	chr11:54971969-54998579	dbveh	dbLSDi	OK	20.9578	45.7329	1.12574	5e-05
Cadm1	chr9:47338434-47661468	dbveh	dbLSDi	OK	20.4717	7.21165	-1.50523	5e-05
Ccnd1	chr7:152115835-152125830	dbveh	dbLSDi	OK	20.4338	6.66289	-1.61674	5e-05
Tat	chr8:112514335-112523704	dbveh	dbLSDi	OK	18.6305	0.585085	-4.99287	5e-05
Itgad	chr7:135317459-135349880	dbveh	dbLSDi	OK	18.2409	6.3019	-1.53332	5e-05
Odf2	chr2:29745239-29787266	dbveh	dbLSDi	OK	18.0602	69.1199	1.93629	5e-05
Spsb1	chr4:149270392-149329115	dbveh	dbLSDi	OK	17.7167	37.7911	1.09294	5e-05
Dmgdh	chr13:94444390-94522778	dbveh	dbLSDi	OK	17.0144	0.520377	-5.03106	5e-05
Pah	chr10:86984539-87046882	dbveh	dbLSDi	OK	16.3357	1.13649	-3.84537	5e-05
Cyp2d26	chr15:82620536-82624675	dbveh	dbLSDi	OK	15.9825	0.923776	-4.11281	5e-05
Col14a1	chr15:55139304-55352358	dbveh	dbLSDi	OK	15.5263	6.70219	-1.21201	5e-05
Cyp2f2	chr7:27904973-27918679	dbveh	dbLSDi	OK	15.4736	0.870236	-4.15226	5e-05
Apoa5	chr9:46076690-46080002	dbveh	dbLSDi	OK	15.3961	0.944425	-4.02699	5e-05
Asgr1	chr11:69867870-69871396	dbveh	dbLSDi	OK	15.0954	0.921493	-4.03399	5e-05
Itih4	chr14:31699677-31715169	dbveh	dbLSDi	OK	14.3919	1.22731	-3.55168	5e-05
Col6a5	chr9:105758399-105862974	dbveh	dbLSDi	OK	13.5903	3.2379	-2.06944	5e-05
Slc38a3	chr9:107553485-107571299	dbveh	dbLSDi	OK	12.9165	0.794822	-4.02244	5e-05
Upk3b	chr5:136514365-136520863	dbveh	dbLSDi	OK	12.1813	1.11471	-3.44993	5e-05
Mug1	chr6:121788558-121839075	dbveh	dbLSDi	OK	11.9563	0.546252	-4.45206	5e-05
G6pc	chr11:101229043-101239217	dbveh	dbLSDi	OK	11.4716	0.551	-4.37987	5e-05
Pigr	chr1:132723260-132748826	dbveh	dbLSDi	OK	11.2439	0.572766	-4.29505	5e-05
Hmga2	chr10:119798330-119913991	dbveh	dbLSDi	OK	11.2258	2.21036	-2.34447	5e-05
Nptx1	chr11:119400032-119409134	dbveh	dbLSDi	OK	9.51862	1.76544	-2.43072	5e-05
Mki67	chr7:142881470-142908062	dbveh	dbLSDi	OK	9.2419	2.6827	-1.7845	5e-05
Apob	chr12:7984482-8023645	dbveh	dbLSDi	OK	9.01682	0.30519	-4.88484	5e-05
Slc38a4	chr15:96825253-96886387	dbveh	dbLSDi	OK	8.92843	0.431954	-4.36946	5e-05
Iigp1	chr18:60535682-60552283	dbveh	dbLSDi	OK	8.57775	22.8593	1.41411	5e-05
Hr	chr14:70953862-70973349	dbveh	dbLSDi	OK	8.50017	21.4716	1.33687	5e-05
Slc40a1	chr1:45964914-45982439	dbveh	dbLSDi	OK	7.79096	19.1204	1.29524	5e-05
St6galnac2	chr11:116538018-116555974	dbveh	dbLSDi	OK	7.7395	24.5343	1.66449	5e-05
Tnc	chr4:63620818-63708049	dbveh	dbLSDi	OK	7.15894	1.48133	-2.27286	5e-05
Slc7a2	chr8:41947720-42007424	dbveh	dbLSDi	OK	7.10411	1.77694	-1.99926	5e-05
Cyp8b1	chr9:121823473-121825423	dbveh	dbLSDi	OK	6.564	0.678903	-3.2733	5e-05
Limch1	chr5:67137078-67448398	dbveh	dbLSDi	OK	6.04129	17.2395	1.51279	5e-05
Hspa2	chr12:77505162-77507923	dbveh	dbLSDi	OK	5.91664	28.7926	2.28285	5e-05
Ybx2	chr11:69749400-69755101	dbveh	dbLSDi	OK	5.82761	45.5615	2.96684	5e-05
Apod	chr16:31296277-31314682	dbveh	dbLSDi	OK	5.79349	27.554	2.24976	5e-05
Bhmt2	chr13:94426051-94444257	dbveh	dbLSDi	OK	5.67728	0.353359	-4.006	5e-05
Mbl1	chr14:41964744-41972248	dbveh	dbLSDi	OK	5.16728	0.270938	-4.25337	5e-05
Serpinf2	chr11:75245237-75253003	dbveh	dbLSDi	OK	5.1115	0.471973	-3.43697	5e-05
Hnf4a	chr2:163372923-163398643	dbveh	dbLSDi	OK	5.0421	0.290712	-4.11636	5e-05
Gbp4	chr5:105544785-105568571	dbveh	dbLSDi	OK	4.67141	13.6976	1.552	5e-05
Pipox	chr11:77694116-77707374	dbveh	dbLSDi	OK	4.52901	0.484147	-3.22568	5e-05
Fmo3	chr1:164883930-164914622	dbveh	dbLSDi	OK	4.51737	0.458899	-3.29923	5e-05
C6	chr15:4677209-4754045	dbveh	dbLSDi	OK	4.17306	19.3429	2.21262	5e-05
Ugt2b1	chr5:87345663-87355528	dbveh	dbLSDi	OK	4.10477	0.190831	-4.42694	5e-05
Rdh16	chr10:127238208-127252895	dbveh	dbLSDi	OK	3.36397	0.342288	-3.29688	5e-05
Fam46c	chr3:100275458-100293115	dbveh	dbLSDi	OK	2.73598	18.6267	2.76724	5e-05
Itih1	chr14:31742365-31756475	dbveh	dbLSDi	OK	2.29201	0.170444	-3.74924	5e-05
4930579G22Rik	chr5:130384409-130387151	dbveh	dbLSDi	OK	2.04371	23.1765	3.5034	5e-05
Cyp3a13	chr5:138334160-138362847	dbveh	dbLSDi	OK	1.98858	0.100824	-4.30183	5e-05
Fabp9	chr3:10193623-10197222	dbveh	dbLSDi	OK	1.7934	37.6342	4.39127	5e-05
1700029J11Rik	chr2:172298053-172299816	dbveh	dbLSDi	OK	1.63146	25.0314	3.9395	5e-05
Dbil5	chr11:76031114-76032167	dbveh	dbLSDi	OK	1.62914	62.1629	5.25387	5e-05
Hc	chr2:34838850-34916961	dbveh	dbLSDi	OK	1.60445	0.128207	-3.64553	5e-05
Grem2	chr1:176763915-176851950	dbveh	dbLSDi	OK	1.50755	0.176785	-3.09214	5e-05
Pgam2	chr11:5701639-5703799	dbveh	dbLSDi	OK	1.29563	19.6195	3.92057	5e-05
Hspb9	chr11:100575163-100575889	dbveh	dbLSDi	OK	1.26371	19.8461	3.97312	5e-05
4732415M23Rik	chr8:125736757-125745945	dbveh	dbLSDi	OK	1.14096	29.892	4.71144	5e-05
Mlf1	chr3:67178018-67203922	dbveh	dbLSDi	OK	1.09205	25.4239	4.54107	5e-05
Oaz3	chr3:94237087-94240538	dbveh	dbLSDi	OK	0.694063	32.5017	5.5493	5e-05
Fhl4	chr10:84559763-84565240	dbveh	dbLSDi	OK	0.442524	24.5805	5.79561	5e-05
Fam71e1	chr7:51751957-51756504	dbveh	dbLSDi	OK	0.721369	16.8234	4.54358	5e-05
Spata3	chr1:87918516-87926533	dbveh	dbLSDi	OK	0.452531	16.1123	5.154	5e-05
Ggn	chr7:29955228-29958952	dbveh	dbLSDi	OK	0.968289	13.1807	3.76684	5e-05
Clip4	chr17:72119030-72207691	dbveh	dbLSDi	OK	0.788281	12.7721	4.01815	5e-05
Tbata	chr10:60634711-60651589	dbveh	dbLSDi	OK	0.351244	12.708	5.17712	5e-05
1700019D03Rik	chr1:52981970-53009684	dbveh	dbLSDi	OK	0.603973	12.5915	4.38182	5e-05
Rsph1	chr17:31391964-31414301	dbveh	dbLSDi	OK	0.612382	12.4479	4.34532	5e-05
2610318N02Rik	chr16:17113490-17125199	dbveh	dbLSDi	OK	0.487946	12.267	4.65192	5e-05
1700026L06Rik	chr2:28547599-28555171	dbveh	dbLSDi	OK	0.606276	12.2072	4.33162	5e-05
Tssk1	chr16:17894295-17895746	dbveh	dbLSDi	OK	0.167979	11.8106	6.13565	5e-05
Lrrc46	chr11:96895915-96902683	dbveh	dbLSDi	OK	0.326937	11.3741	5.1206	5e-05
Klhl10	chr11:100303237-100318338	dbveh	dbLSDi	OK	0.23721	11.3081	5.57505	5e-05
1700003E16Rik	chr6:83106397-83112969	dbveh	dbLSDi	OK	0.251215	10.8751	5.43596	5e-05
BC049762	chr11:51067152-51076453	dbveh	dbLSDi	OK	0.595877	10.0879	4.08147	5e-05
Aard	chr15:51871652-51877269	dbveh	dbLSDi	OK	0.345559	8.93004	4.69166	5e-05
Ccdc92	chr5:125314801-125342591	dbveh	dbLSDi	OK	0.458533	8.33085	4.18337	5e-05
Pmfbp1	chr8:112017926-112066542	dbveh	dbLSDi	OK	0.105381	8.04428	6.25428	5e-05
Trim17	chr11:58777282-58785231	dbveh	dbLSDi	OK	0.238717	8.01127	5.06865	5e-05
Best1	chr19:10059661-10076123	dbveh	dbLSDi	OK	0.489972	7.28138	3.89344	5e-05
1700028J19Rik	chr7:51485299-51491492	dbveh	dbLSDi	OK	0.387731	6.63577	4.09714	5e-05
Slc22a14	chr9:119078573-119099511	dbveh	dbLSDi	OK	0.4775	6.47825	3.76203	5e-05
Ccdc89	chr7:97574821-97577174	dbveh	dbLSDi	OK	0.3734	6.47651	4.11642	5e-05
Ttll13	chr7:87391261-87405707	dbveh	dbLSDi	OK	0.262942	6.42863	4.6117	5e-05
Rnf32	chr5:29524545-29551831	dbveh	dbLSDi	OK	0.474908	6.34476	3.73984	5e-05
Bspry	chr4:62141100-62158332	dbveh	dbLSDi	OK	0.193886	6.33942	5.03107	5e-05
1700061G19Rik	chr17:57015055-57028261	dbveh	dbLSDi	OK	0.238454	6.22752	4.70688	5e-05
4930412F15Rik	chr4:43672493-43681731	dbveh	dbLSDi	OK	0.0732652	6.03268	6.36353	5e-05
Adam5	chr8:25843456-25934841	dbveh	dbLSDi	OK	0.172923	6.02389	5.12249	5e-05
1700030J22Rik	chr8:119493498-119502843	dbveh	dbLSDi	OK	0.332893	5.64905	4.08488	5e-05
Ccdc65	chr15:98538657-98553764	dbveh	dbLSDi	OK	0.208066	5.60037	4.75041	5e-05
Efcab9	chr11:32422732-32427574	dbveh	dbLSDi	OK	0.247145	5.59021	4.49947	5e-05
Sox30	chr11:45793811-45831494	dbveh	dbLSDi	OK	0.119008	5.54879	5.54304	5e-05
BC061194	chr2:18620648-18671232	dbveh	dbLSDi	OK	0.118689	5.48806	5.53104	5e-05
Spata9	chr13:76105186-76136416	dbveh	dbLSDi	OK	0.262192	5.43696	4.3741	5e-05
Hook1	chr4:95634069-95690965	dbveh	dbLSDi	OK	0.436227	5.13502	3.55722	5e-05
Dnahc8	chr17:30763880-31012209	dbveh	dbLSDi	OK	0.265331	5.04527	4.24907	5e-05
4930579J09Rik	chr19:10548746-10557387	dbveh	dbLSDi	OK	0.155313	4.67514	4.91176	5e-05
Fank1	chr7:140968573-141073215	dbveh	dbLSDi	OK	0.281902	4.56185	4.01635	5e-05
Cldn11	chr3:31048841-31063248	dbveh	dbLSDi	OK	0.201617	4.48889	4.47667	5e-05
Ubxn10	chr4:138274440-138281166	dbveh	dbLSDi	OK	0.303249	4.35785	3.84504	5e-05
Ccdc116	chr16:17139156-17144516	dbveh	dbLSDi	OK	0.0986201	4.34196	5.46032	5e-05
4930544O15Rik	chr4:115452438-115453639	dbveh	dbLSDi	OK	0.126063	4.30709	5.09449	5e-05
Gm4787	chr12:82477977-82480473	dbveh	dbLSDi	OK	0.0935228	4.30155	5.5234	5e-05
Stag3	chr5:138721736-138753621	dbveh	dbLSDi	OK	0.28548	4.25608	3.89806	5e-05
C530008M17Rik	chr5:77269623-77302579	dbveh	dbLSDi	OK	0.0665608	4.23009	5.98987	5e-05
Chl1	chr6:103460869-103683029	dbveh	dbLSDi	OK	0.262729	3.81923	3.86163	5e-05
1700012A16Rik	chr1:155272338-155299704	dbveh	dbLSDi	OK	0.160027	3.78665	4.56454	5e-05
Mycbpap	chr11:94362660-94382816	dbveh	dbLSDi	OK	0.0753633	3.74043	5.6332	5e-05
Ccdc42	chr11:68400538-68411453	dbveh	dbLSDi	OK	0.257419	3.73197	3.85775	5e-05
Amac1	chr11:69573386-69575346	dbveh	dbLSDi	OK	0.13726	3.53562	4.68698	5e-05
Kif27	chr13:58388876-58456223	dbveh	dbLSDi	OK	0.112266	3.43263	4.93431	5e-05
A330021E22Rik	chr5:5580981-5664232	dbveh	dbLSDi	OK	0.194224	3.12878	4.0098	5e-05
Pbx4	chr8:72356602-72396191	dbveh	dbLSDi	OK	0.187127	3.03982	4.02189	5e-05
Lpar3	chr3:145883924-145949178	dbveh	dbLSDi	OK	0.295405	2.87638	3.28349	5e-05
Ttc21a	chr9:119846723-119876911	dbveh	dbLSDi	OK	0.0434963	2.68869	5.94987	5e-05
Hipk4	chr7:28308279-28316193	dbveh	dbLSDi	OK	0.173316	2.66495	3.94263	5e-05
4931417G12Rik	chr6:113546755-113550709	dbveh	dbLSDi	OK	0.0976001	2.59952	4.73522	5e-05
Nsun7	chr5:66651363-66689255	dbveh	dbLSDi	OK	0.232921	2.46897	3.406	5e-05
Cpa5	chr6:30561009-30581521	dbveh	dbLSDi	OK	0.128941	2.135	4.04946	5e-05
4930590J08Rik	chr6:91854226-91900719	dbveh	dbLSDi	OK	0.0467156	1.92991	5.36849	5e-05
Ccdc164	chr5:30607913-30668993	dbveh	dbLSDi	OK	0.0393383	1.75456	5.47903	5e-05
Adam4	chr12:82520535-82522865	dbveh	dbLSDi	OK	0.110117	1.46919	3.73791	5e-05
Efhb	chr17:53538213-53602646	dbveh	dbLSDi	OK	0.087852	1.35579	3.94792	5e-05
Lrp2bp	chr8:47095955-47114830	dbveh	dbLSDi	OK	0.0466609	1.32934	4.83236	5e-05
AI836003	chr15:97998236-98000565	dbveh	dbLSDi	OK	0.0888529	1.23711	3.79941	5e-05
Sycp2	chr2:178080000-178142363	dbveh	dbLSDi	OK	0.12997	1.12714	3.11643	5e-05
Gm973	chr1:59573107-59691353	dbveh	dbLSDi	OK	0.0544407	1.07846	4.30814	5e-05
Asb15	chr6:24478143-24523164	dbveh	dbLSDi	OK	0.0516638	1.0242	4.3092	5e-05
Galnt3	chr2:65920822-65962850	dbveh	dbLSDi	OK	0.0630059	1.00777	3.99953	5e-05
Trank1	chr9:111214242-111298279	dbveh	dbLSDi	OK	0.0378857	0.60481	3.99676	5e-05
Wdr52	chr16:44394911-44482541	dbveh	dbLSDi	OK	0.0382014	0.448135	3.55224	5e-05
Basp1	chr15:25293031-25343519	dbveh	dbLSDi	OK	47.4098	20.4766	-1.21121	0.0001
Nceh1	chr3:27081925-27143833	dbveh	dbLSDi	OK	45.0699	22.3532	-1.01168	0.0001
Vegfa	chr17:46153942-46169326	dbveh	dbLSDi	OK	30.7376	61.375	0.997646	0.0001
Clec12a	chr6:129300261-129315321	dbveh	dbLSDi	OK	30.3451	9.32376	-1.70248	0.0001
Serpinb6b	chr13:33057381-33070906	dbveh	dbLSDi	OK	26.7848	9.12363	-1.55374	0.0001
Syt12	chr19:4445907-4477143	dbveh	dbLSDi	OK	8.03213	18.9978	1.24198	0.0001
Itih3	chr14:31721759-31736773	dbveh	dbLSDi	OK	4.39933	0.411871	-3.41702	0.0001
Aldh8a1	chr10:21097105-21116384	dbveh	dbLSDi	OK	4.37214	0.445282	-3.29555	0.0001
Phf7	chr14:32050881-32064404	dbveh	dbLSDi	OK	3.95395	28.9946	2.87442	0.0001
Tmprss6	chr15:78270096-78299064	dbveh	dbLSDi	OK	2.79229	0.256633	-3.44367	0.0001
Trim36	chr18:46324953-46372261	dbveh	dbLSDi	OK	2.46951	8.33793	1.75547	0.0001
Nup210	chr6:90963060-91066820	dbveh	dbLSDi	OK	1.18219	4.69767	1.99048	0.0001
Ccdc19	chr1:174451260-174480937	dbveh	dbLSDi	OK	0.765334	8.29541	3.43815	0.0001
Chd5	chr4:151712759-151764303	dbveh	dbLSDi	OK	0.444895	4.60031	3.37019	0.0001
Lrrc9	chr12:73542852-73611552	dbveh	dbLSDi	OK	0.205782	3.57991	4.12073	0.0001
1700102P08Rik	chr9:108295164-108300098	dbveh	dbLSDi	OK	0.238716	3.22599	3.75637	0.0001
Eno4	chr19:59017914-59045911	dbveh	dbLSDi	OK	0.100042	1.07206	3.42171	0.0001
Lcp1	chr14:75536231-75630610	dbveh	dbLSDi	OK	182.176	77.3266	-1.2363	0.00015
Nckap1l	chr15:103284255-103329231	dbveh	dbLSDi	OK	65.1092	31.653	-1.04052	0.00015
Hpd	chr5:123621815-123632695	dbveh	dbLSDi	OK	34.9813	2.97427	-3.55597	0.00015
Ccr5	chr9:124036281-124041922	dbveh	dbLSDi	OK	31.5484	14.969	-1.07559	0.00015
Hpx	chr7:112740124-112748630	dbveh	dbLSDi	OK	25.21	4.67383	-2.43132	0.00015
Sel1l3	chr5:53498321-53604691	dbveh	dbLSDi	OK	12.4315	4.27132	-1.54125	0.00015
Ugt3a2	chr15:9265352-9300625	dbveh	dbLSDi	OK	11.6688	2.23923	-2.38159	0.00015
Upb1	chr10:74869778-74902940	dbveh	dbLSDi	OK	8.40378	0.805045	-3.3839	0.00015
Prune2	chr19:17030607-17298422	dbveh	dbLSDi	OK	5.5382	2.32761	-1.25057	0.00015
1700029G01Rik	chr4:125827845-125840585	dbveh	dbLSDi	OK	2.54199	23.5098	3.20923	0.00015
Spag4	chr2:155890948-155895235	dbveh	dbLSDi	OK	1.05099	12.2581	3.54392	0.00015
Creb3l4	chr3:90041421-90047434	dbveh	dbLSDi	OK	0.814467	9.47971	3.54091	0.00015
Ak8	chr2:28555680-28668685	dbveh	dbLSDi	OK	0.827608	8.09841	3.29062	0.00015
Stat4	chr1:52065087-52164028	dbveh	dbLSDi	OK	0.43037	6.52458	3.92224	0.00015
Ttc39a	chr4:109079704-109117350	dbveh	dbLSDi	OK	0.55108	5.88859	3.41759	0.00015
4930579C15Rik	chr4:94573983-94595501	dbveh	dbLSDi	OK	0.206607	4.64226	4.48987	0.00015
Enkur	chr2:21102357-21126992	dbveh	dbLSDi	OK	0.346625	4.29914	3.6326	0.00015
Tmem146	chr17:56767565-56803879	dbveh	dbLSDi	OK	0.106951	1.25657	3.55446	0.00015
Efhc2	chrX:16709174-16896494	dbveh	dbLSDi	OK	0.0993381	1.11812	3.49258	0.00015
Col1a1	chr11:94797583-94813170	dbveh	dbLSDi	OK	557.204	146.329	-1.92899	0.0002
Cd300lb	chr11:114784094-114795700	dbveh	dbLSDi	OK	33.4436	16.421	-1.02619	0.0002
Kng1	chr16:23058372-23082151	dbveh	dbLSDi	OK	31.5446	1.85294	-4.0895	0.0002
Cd300ld	chr11:114843760-114851200	dbveh	dbLSDi	OK	29.5632	12.9545	-1.19035	0.0002
Cxcl2	chr5:91332924-91334964	dbveh	dbLSDi	OK	26.6547	2.23829	-3.57392	0.0002
Ttc36	chr9:44607482-44611034	dbveh	dbLSDi	OK	25.2057	2.92256	-3.10845	0.0002
Nedd9	chr13:41405284-41582689	dbveh	dbLSDi	OK	24.8637	48.6856	0.969453	0.0002
Dcbld2	chr16:58408647-58469858	dbveh	dbLSDi	OK	23.9891	12.1923	-0.976405	0.0002
Slc25a42	chr8:72708238-72736180	dbveh	dbLSDi	OK	19.1465	36.5318	0.932074	0.0002
Lcat	chr8:108463450-108467302	dbveh	dbLSDi	OK	9.99614	1.10344	-3.17936	0.0002
Ptch2	chr4:116768960-116787436	dbveh	dbLSDi	OK	3.29762	10.3983	1.65685	0.0002
Amhr2	chr15:102275797-102285070	dbveh	dbLSDi	OK	0.842887	9.94925	3.56118	0.0002
Xrra1	chr7:107007727-107066334	dbveh	dbLSDi	OK	0.566176	6.07166	3.42277	0.0002
Fndc8	chr11:82705646-82714239	dbveh	dbLSDi	OK	0.261981	3.1859	3.60417	0.0002
Adcy10	chr1:167415313-167506904	dbveh	dbLSDi	OK	0.279677	2.8489	3.34857	0.0002
Cct6b	chr11:82532749-82577790	dbveh	dbLSDi	OK	0.182762	2.34927	3.68417	0.0002
Srcin1	chr11:97370653-97436440	dbveh	dbLSDi	OK	0.0900947	0.894464	3.31151	0.0002
Sdc1	chr12:8778201-8800493	dbveh	dbLSDi	OK	71.3177	35.5662	-1.00375	0.00025
Rab8b	chr9:66691470-66767512	dbveh	dbLSDi	OK	48.1617	24.4903	-0.975677	0.00025
S100a9	chr3:90496554-90499613	dbveh	dbLSDi	OK	39.7213	6.16446	-2.68787	0.00025
Igf2r	chr17:12875271-13061009	dbveh	dbLSDi	OK	25.4051	13.566	-0.905123	0.00025
Pon1	chr6:5118089-5143946	dbveh	dbLSDi	OK	15.2287	1.36373	-3.48116	0.00025
Cd274	chr19:29441927-29462584	dbveh	dbLSDi	OK	7.59872	16.1867	1.09098	0.00025
Top2a	chr11:98854260-98885503	dbveh	dbLSDi	OK	6.67114	2.11085	-1.66011	0.00025
Msln	chr17:25885557-25891272	dbveh	dbLSDi	OK	4.47768	0.529622	-3.07971	0.00025
Crisp2	chr17:40901682-40931095	dbveh	dbLSDi	OK	0.893433	22.5867	4.65997	0.00025
2810408A11Rik	chr11:69710859-69714488	dbveh	dbLSDi	OK	0.550441	5.21993	3.24537	0.00025
1700008I05Rik	chrX:132189236-132228329	dbveh	dbLSDi	OK	0.190694	2.14803	3.49368	0.00025
Kcnu1	chr8:26960094-27048406	dbveh	dbLSDi	OK	0.206449	1.82922	3.14737	0.00025
Ulk4	chr9:120873571-121186290	dbveh	dbLSDi	OK	0.172118	1.49128	3.11508	0.00025
Hbb-b1	chr7:110961037-110962437	dbveh	dbLSDi	OK	347.561	1043.88	1.58661	0.0003
Fstl1	chr16:37777140-37836602	dbveh	dbLSDi	OK	153.647	75.1889	-1.03103	0.0003
Colec12	chr18:9707645-9877993	dbveh	dbLSDi	OK	50.6312	28.1699	-0.845872	0.0003
Slc37a2	chr9:37036733-37063323	dbveh	dbLSDi	OK	42.1427	21.052	-1.00133	0.0003
Tlr8	chrX:163680663-163701720	dbveh	dbLSDi	OK	17.8023	7.42252	-1.26209	0.0003
Efr3b	chr12:3962553-4038915	dbveh	dbLSDi	OK	9.07682	3.46998	-1.38726	0.0003
Lrrn4	chr2:132694251-132706598	dbveh	dbLSDi	OK	1.70744	0.240694	-2.82657	0.0003
Fam71f2	chr6:29231140-29240676	dbveh	dbLSDi	OK	1.18826	9.58019	3.0112	0.0003
1700001K19Rik	chr12:111905898-111920829	dbveh	dbLSDi	OK	0.390392	5.71809	3.87254	0.0003
Dyrk3	chr1:133025017-133034811	dbveh	dbLSDi	OK	0.519967	4.49963	3.11332	0.0003
Tmc7	chr7:125679357-125728200	dbveh	dbLSDi	OK	0.267082	2.31988	3.1187	0.0003
Mrc1	chr2:14151040-14253650	dbveh	dbLSDi	OK	71.5936	37.2434	-0.942844	0.00035
Anpep	chr7:86966688-86987238	dbveh	dbLSDi	OK	62.8384	32.8748	-0.934667	0.00035
Cd14	chr18:36884720-36886308	dbveh	dbLSDi	OK	46.8209	20.9911	-1.15738	0.00035
Selenbp1	chr3:94737004-94748680	dbveh	dbLSDi	OK	44.4731	81.886	0.880686	0.00035
Cd53	chr3:106561778-106593067	dbveh	dbLSDi	OK	39.6908	19.7765	-1.00501	0.00035
Serpina1c	chr12:105133135-105143160	dbveh	dbLSDi	OK	24.854	2.55471	-3.28225	0.00035
Rdh7	chr10:127321082-127325789	dbveh	dbLSDi	OK	20.5098	0.992067	-4.36974	0.00035
Acr	chr15:89398756-89405016	dbveh	dbLSDi	OK	1.01633	8.15479	3.00428	0.00035
Tekt2	chr4:125999364-126002443	dbveh	dbLSDi	OK	1.00114	10.6993	3.41781	0.00035
Slc2a5	chr4:149493452-149518277	dbveh	dbLSDi	OK	0.93532	7.08923	2.9221	0.00035
Catsper3	chr13:55885939-55910359	dbveh	dbLSDi	OK	0.269799	4.43659	4.03949	0.00035
Comp	chr8:72897446-72905965	dbveh	dbLSDi	OK	0.367818	3.39654	3.207	0.00035
Ldlr	chr9:21528037-21554362	dbveh	dbLSDi	OK	23.2337	11.909	-0.964164	0.0004
Hspa4l	chr3:40549534-40594287	dbveh	dbLSDi	OK	8.27411	18.2706	1.14285	0.0004
Nrcam	chr12:45429871-45702833	dbveh	dbLSDi	OK	6.06852	1.93505	-1.64897	0.0004
Creb3l3	chr10:80547077-80561617	dbveh	dbLSDi	OK	5.28128	0.599843	-3.13823	0.0004
Kif11	chr19:37450892-37496349	dbveh	dbLSDi	OK	5.04276	1.61391	-1.64366	0.0004
1700001L05Rik	chr15:83184276-83197727	dbveh	dbLSDi	OK	0.736283	3.17301	2.10752	0.0004
Aldoart1	chr4:72511616-72513668	dbveh	dbLSDi	OK	0.193719	2.55754	3.72272	0.0004
Efcab5	chr11:76903416-77002470	dbveh	dbLSDi	OK	0.0675498	1.02298	3.92068	0.0004
S100a4	chr3:90407691-90409967	dbveh	dbLSDi	OK	711.996	359.048	-0.987692	0.00045
Itgam	chr7:135206153-135262005	dbveh	dbLSDi	OK	70.3145	34.4994	-1.02725	0.00045
Hgsnat	chr8:27054930-27087216	dbveh	dbLSDi	OK	62.7823	32.8828	-0.933023	0.00045
Rgs1	chr1:146091798-146096234	dbveh	dbLSDi	OK	58.4363	27.5045	-1.08719	0.00045
Metrnl	chr11:121563740-121578703	dbveh	dbLSDi	OK	46.4885	23.6064	-0.977695	0.00045
Cyp2a5	chr7:27620357-27628283	dbveh	dbLSDi	OK	26.1373	2.33287	-3.48593	0.00045
Zranb3	chr1:129850762-129998985	dbveh	dbLSDi	OK	5.02667	1.13595	-2.14571	0.00045
1700010I14Rik	chr17:9181197-9201184	dbveh	dbLSDi	OK	0.8621	7.97169	3.20896	0.00045
Fbxo24	chr5:138053732-138066306	dbveh	dbLSDi	OK	0.540322	5.15686	3.2546	0.00045
Pfn4	chr12:4776100-4785072	dbveh	dbLSDi	OK	0.340381	3.18567	3.22637	0.00045
Ccdc158	chr5:93037320-93104153	dbveh	dbLSDi	OK	0.105814	1.06867	3.33621	0.00045
Tm4sf19	chr16:32400591-32408313	dbveh	dbLSDi	OK	52.0576	21.6553	-1.26539	0.0005
Serpina1a	chr12:105091668-105101829	dbveh	dbLSDi	OK	19.1007	1.90474	-3.32596	0.0005
Ropn1l	chr15:31370964-31383444	dbveh	dbLSDi	OK	3.35525	32.1523	3.26043	0.0005
Abcc2	chr19:43856797-43912708	dbveh	dbLSDi	OK	2.31203	0.320087	-2.85263	0.0005
Gm70	chr12:77518585-77540478	dbveh	dbLSDi	OK	0.311942	3.98412	3.67491	0.0005
Apoh	chr11:108256610-108275710	dbveh	dbLSDi	OK	50.9501	4.11265	-3.63094	0.00055
Cfh	chr1:141982431-142079988	dbveh	dbLSDi	OK	37.7587	21.5814	-0.807017	0.00055
Cd180	chr13:103483637-103496711	dbveh	dbLSDi	OK	29.2706	13.8068	-1.08407	0.00055
Fmod	chr1:135934091-135944854	dbveh	dbLSDi	OK	14.2316	3.73867	-1.9285	0.00055
Col8a1	chr16:57624368-57754850	dbveh	dbLSDi	OK	8.65374	3.10289	-1.47971	0.00055
Cdh11	chr8:105156894-105309011	dbveh	dbLSDi	OK	5.68594	1.25309	-2.18191	0.00055
1300017J02Rik	chr9:103152859-103190627	dbveh	dbLSDi	OK	3.21847	0.45914	-2.80937	0.00055
Rdh9	chr10:127213460-127229753	dbveh	dbLSDi	OK	2.00235	0.293904	-2.76828	0.00055
Sec14l4	chr11:3931784-3948012	dbveh	dbLSDi	OK	1.76377	0.149959	-3.55602	0.00055
Col5a1	chr2:27741944-27895030	dbveh	dbLSDi	OK	122.482	60.2441	-1.02368	0.0006
Cyth4	chr15:78427476-78452449	dbveh	dbLSDi	OK	87.8093	45.2993	-0.954885	0.0006
Cyp2c50	chr19:40164168-40188445	dbveh	dbLSDi	OK	28.8321	1.13863	-4.66231	0.0006
Phkg2	chr7:134716861-134732109	dbveh	dbLSDi	OK	20.7811	44.6425	1.10314	0.0006
Pdzrn3	chr6:101099600-101327891	dbveh	dbLSDi	OK	20.7153	37.4641	0.85481	0.0006
Cd109	chr9:78463352-78564067	dbveh	dbLSDi	OK	7.87959	3.53106	-1.15802	0.0006
Calcrl	chr2:84170782-84265423	dbveh	dbLSDi	OK	12.5625	6.038	-1.05698	0.00065
Fos	chr12:86814850-86818219	dbveh	dbLSDi	OK	53.8782	28.7577	-0.905752	0.0007
Msr1	chr8:40667053-40728032	dbveh	dbLSDi	OK	38.3435	17.4506	-1.13571	0.0007
Usp2	chr9:43875103-43903710	dbveh	dbLSDi	OK	5.08647	12.9917	1.35285	0.0007
Ankrd5	chr2:136358056-136381590	dbveh	dbLSDi	OK	2.43584	11.6647	2.25966	0.0007
Hspa1l	chr17:35109647-35116173	dbveh	dbLSDi	OK	1.09036	11.615	3.41311	0.0007
Ubxn11	chr4:133658513-133682693	dbveh	dbLSDi	OK	0.697951	5.68318	3.0255	0.0007
Cage1	chr13:38097920-38128806	dbveh	dbLSDi	OK	0.430589	3.43354	2.99532	0.0007
Agbl2	chr2:90622900-90656388	dbveh	dbLSDi	OK	0.123289	1.3805	3.48507	0.0007
Art3	chr5:92760866-92843653	dbveh	dbLSDi	OK	53.7234	96.5289	0.845412	0.00075
Vhl	chr6:113574014-113581627	dbveh	dbLSDi	OK	43.4511	78.5295	0.853844	0.00075
Rrm1	chr7:109590208-109618285	dbveh	dbLSDi	OK	15.3907	7.42301	-1.05198	0.00075
D11Wsu47e	chr11:113545725-113555961	dbveh	dbLSDi	OK	4.30712	14.0086	1.70152	0.00075
Gpm6a	chr8:56040080-56146231	dbveh	dbLSDi	OK	3.25815	0.37271	-3.12793	0.00075
Ptgs2	chr1:151947253-151955142	dbveh	dbLSDi	OK	1.13678	0.0863354	-3.71886	0.00075
Ccdc30	chr4:118996443-119088126	dbveh	dbLSDi	OK	0.178593	2.22501	3.63906	0.00075
Cotl1	chr8:122333113-122364479	dbveh	dbLSDi	OK	187.614	103.539	-0.857598	0.0008
Bnip3	chr7:146082518-146101189	dbveh	dbLSDi	OK	122.36	214.649	0.810846	0.0008
Gcnt1	chr19:17400630-17447334	dbveh	dbLSDi	OK	11.503	4.97713	-1.20862	0.0008
Tulp2	chr7:52769075-52777973	dbveh	dbLSDi	OK	0.348845	31.9256	6.51598	0.0008
Hpgds	chr6:65067286-65094724	dbveh	dbLSDi	OK	21.0083	10.2069	-1.04141	0.00085
Dhrs9	chr2:69218518-69241143	dbveh	dbLSDi	OK	17.542	6.22772	-1.49404	0.00085
Tmeff1	chr4:48598064-48676003	dbveh	dbLSDi	OK	9.27138	20.767	1.16344	0.00085
Haao	chr17:84230693-84246130	dbveh	dbLSDi	OK	6.65934	0.897447	-2.89148	0.00085
Tssk4	chr14:56269018-56271369	dbveh	dbLSDi	OK	0.357031	5.55922	3.96076	0.00085
Prr22	chr17:56909698-56911557	dbveh	dbLSDi	OK	0.405394	3.9624	3.28898	0.00085
Cyp2d9	chr15:82282806-82287257	dbveh	dbLSDi	OK	6.57035	1.12497	-2.54608	0.0009
Cox6b2	chr7:4703395-4704696	dbveh	dbLSDi	OK	2.96599	20.5444	2.79216	0.0009
Zfp37	chr4:61850576-61869580	dbveh	dbLSDi	OK	1.20392	4.7299	1.97407	0.0009
Tmem132b	chr5:126012787-126272953	dbveh	dbLSDi	OK	0.297238	2.69793	3.18216	0.0009
Siglec1	chr2:130894955-130912501	dbveh	dbLSDi	OK	15.0685	7.894	-0.932709	0.00095
Cspg4	chr9:56712910-56747677	dbveh	dbLSDi	OK	9.93249	5.25017	-0.919792	0.00095
Upk1b	chr16:38773296-38800316	dbveh	dbLSDi	OK	4.39043	0.747568	-2.55409	0.00095
Iyd	chr10:6791663-6806262	dbveh	dbLSDi	OK	1.71572	0.259165	-2.72687	0.00095
Kap	chr6:133799872-133803685	dbveh	dbLSDi	OK	84.5626	25.1929	-1.747	0.001
Alcam	chr16:52249108-52453110	dbveh	dbLSDi	OK	20.3505	10.9322	-0.896479	0.001
Cyp3a25	chr5:146788769-146821194	dbveh	dbLSDi	OK	16.4909	0.954693	-4.11049	0.001
Tnfrsf11a	chr1:107677299-107744558	dbveh	dbLSDi	OK	15.0129	7.33795	-1.03275	0.001
Spa17	chr9:37410878-37421305	dbveh	dbLSDi	OK	2.8025	23.2223	3.05073	0.001
Bgn	chrX:70728973-70741275	dbveh	dbLSDi	OK	482.197	234.204	-1.04186	0.00105
Enpp2	chr15:54670452-54751701	dbveh	dbLSDi	OK	99.3951	57.4096	-0.791883	0.00105
Cyp1b1	chr17:80106292-80114381	dbveh	dbLSDi	OK	32.6454	18.6162	-0.81032	0.00105
Plxnb2	chr15:88985978-89011218	dbveh	dbLSDi	OK	28.0408	15.6454	-0.841791	0.00105
Uox	chr3:146244336-146294447	dbveh	dbLSDi	OK	24.3827	1.1547	-4.40027	0.00105
Atp1a4	chr1:174153638-174188555	dbveh	dbLSDi	OK	0.77298	7.36171	3.25154	0.00105
Lass3	chr7:73888389-73968578	dbveh	dbLSDi	OK	0.140114	1.66	3.56651	0.00105
Rd3	chr1:193801253-193812163	dbveh	dbLSDi	OK	0.103465	0.965757	3.22251	0.00105
Fn1	chr1:71632096-71699745	dbveh	dbLSDi	OK	76.5146	36.0048	-1.08755	0.0011
Clu	chr14:66587319-66600382	dbveh	dbLSDi	OK	51.653	105.368	1.02852	0.0011
Atp2a3	chr11:72774670-72806545	dbveh	dbLSDi	OK	32.5989	56.9024	0.803664	0.0011
Ttc25	chr11:100406945-100433880	dbveh	dbLSDi	OK	0.525125	3.17524	2.59613	0.0011
Trem2	chr17:48485725-48491598	dbveh	dbLSDi	OK	210.514	114.23	-0.881969	0.00115
Apoc3	chr9:46041133-46043380	dbveh	dbLSDi	OK	131.383	11.6468	-3.49577	0.00115
Gusb	chr5:130464890-130478698	dbveh	dbLSDi	OK	125.518	71.7021	-0.807807	0.00115
Fkbp10	chr11:100277007-100302403	dbveh	dbLSDi	OK	30.4561	15.4201	-0.981918	0.0012
Hgfac	chr5:35384201-35391085	dbveh	dbLSDi	OK	1.70604	0.22813	-2.90272	0.0012
Fcer1g	chr1:173159702-173164480	dbveh	dbLSDi	OK	256.327	139.763	-0.875	0.00125
Prrx1	chr1:165175249-165243781	dbveh	dbLSDi	OK	28.0855	15.9394	-0.817232	0.00125
Dock2	chr11:34126863-34597325	dbveh	dbLSDi	OK	9.89136	4.6418	-1.09148	0.00125
Rbpms	chr8:34893115-35040313	dbveh	dbLSDi	OK	53.0095	98.8935	0.899624	0.0013
Ftcd	chr10:76038392-76053083	dbveh	dbLSDi	OK	4.73314	0.604434	-2.96914	0.0013
Iqgap3	chr3:87885972-87924970	dbveh	dbLSDi	OK	2.95313	0.792699	-1.8974	0.0013
Ctsk	chr3:95303207-95313284	dbveh	dbLSDi	OK	393.899	203.994	-0.949302	0.00135
Gas2l3	chr10:88871567-88906712	dbveh	dbLSDi	OK	6.06285	2.43153	-1.31814	0.00135
Slc2a2	chr3:28596824-28627282	dbveh	dbLSDi	OK	3.77106	0.603864	-2.64268	0.00135
Nup210l	chr3:89908053-90015939	dbveh	dbLSDi	OK	0.085769	0.930542	3.43954	0.00135
Gcnt2	chr13:40955500-41056261	dbveh	dbLSDi	OK	32.1784	55.3084	0.781405	0.0014
Psma8	chr18:14864659-14920808	dbveh	dbLSDi	OK	0.569877	3.615	2.66527	0.0014
Apobec1	chr6:122527809-122552462	dbveh	dbLSDi	OK	69.796	38.9709	-0.840746	0.00145
Chchd10	chr10:75398317-75400479	dbveh	dbLSDi	OK	67.1019	135.055	1.00912	0.00145
Ptprc	chr1:139959437-140071882	dbveh	dbLSDi	OK	17.0607	9.21608	-0.88845	0.00145
Igf2bp2	chr16:22059081-22163372	dbveh	dbLSDi	OK	10.9271	4.76527	-1.19728	0.00145
Gltpd2	chr11:70332710-70334238	dbveh	dbLSDi	OK	3.86778	0.453809	-3.09135	0.00145
Atp6v0d2	chr4:19803984-19849713	dbveh	dbLSDi	OK	104.447	56.8413	-0.877761	0.0015
Lpxn	chr19:12873098-12908298	dbveh	dbLSDi	OK	52.0316	28.2571	-0.880775	0.0015
Clec4a2	chr6:123072707-123094017	dbveh	dbLSDi	OK	25.6989	12.4477	-1.04582	0.0015
Ntrk2	chr13:58907956-59231328	dbveh	dbLSDi	OK	21.7703	38.4979	0.822418	0.0015
Dusp9	chrX:70884779-70888853	dbveh	dbLSDi	OK	6.25815	16.0894	1.3623	0.0015
Tcfl5	chr2:180332926-180377396	dbveh	dbLSDi	OK	1.48305	11.9295	3.0079	0.0015
Morn5	chr2:35904992-35935229	dbveh	dbLSDi	OK	0.970056	10.9032	3.49054	0.0015
Plagl1	chr10:12810593-12851501	dbveh	dbLSDi	OK	24.4464	44.31	0.858014	0.00155
Pla2g5	chr4:138355161-138419384	dbveh	dbLSDi	OK	0.956905	11.3594	3.56937	0.00155
Morn4	chr19:42149428-42160860	dbveh	dbLSDi	OK	0.507202	3.22032	2.66657	0.00155
Tns3	chr11:8331654-8564538	dbveh	dbLSDi	OK	24.1287	13.9312	-0.79243	0.0016
5430411K18Rik	chr18:78135205-78231766	dbveh	dbLSDi	OK	5.572	9.99866	0.84354	0.0016
Ptp4a3	chr15:73553574-73589196	dbveh	dbLSDi	OK	12.7091	23.0891	0.861349	0.00165
Prkce	chr17:86567124-87057259	dbveh	dbLSDi	OK	10.8925	18.6005	0.772004	0.00165
Cd84	chr1:173769827-173820849	dbveh	dbLSDi	OK	55.4303	31.2281	-0.827829	0.0017
Acer2	chr4:86520317-86566785	dbveh	dbLSDi	OK	29.8635	50.9647	0.771115	0.0017
Brdt	chr5:107760212-107816077	dbveh	dbLSDi	OK	1.13917	4.96829	2.12477	0.0017
Beta-s	chr7:110975036-110976442	dbveh	dbLSDi	OK	2013.15	5315.35	1.40071	0.00175
Zfp598	chr17:24806696-24818961	dbveh	dbLSDi	OK	28.9353	48.904	0.757122	0.00175
Sirpa	chr2:129418574-129457964	dbveh	dbLSDi	OK	137.615	73.4547	-0.905716	0.0018
Plek	chr11:16871208-16908721	dbveh	dbLSDi	OK	39.9558	22.8562	-0.80582	0.0018
2210404O07Rik	chr10:80855808-80857824	dbveh	dbLSDi	OK	4.94883	34.8422	2.81568	0.0018
Itgax	chr7:135273081-135294171	dbveh	dbLSDi	OK	42.935	24.1473	-0.83029	0.00185
Lpin2	chr17:71533317-71599158	dbveh	dbLSDi	OK	11.9527	6.19757	-0.947563	0.00185
Atf3	chr1:192994175-193007212	dbveh	dbLSDi	OK	41.8923	22.8083	-0.877125	0.0019
Pcp4l1	chr1:173103394-173126399	dbveh	dbLSDi	OK	15.5343	1.85437	-3.06646	0.0019
Adam12	chr7:141074882-141416780	dbveh	dbLSDi	OK	8.15837	4.33984	-0.910641	0.0019
Rnf17	chr14:57021533-57143868	dbveh	dbLSDi	OK	0.319103	2.13479	2.742	0.0019
Ace	chr11:105829258-105851278	dbveh	dbLSDi	OK	27.2018	46.4877	0.773149	0.00195
Dnahc1	chr14:32073560-32137082	dbveh	dbLSDi	OK	0.0430219	0.28539	2.72979	0.00195
Tyrobp	chr7:31198806-31202598	dbveh	dbLSDi	OK	725.475	419.731	-0.789463	0.002
Mmp12	chr9:7347373-7360461	dbveh	dbLSDi	OK	212.867	86.2968	-1.30257	0.002
Rbp7	chr4:148823810-148829077	dbveh	dbLSDi	OK	61.9096	129.633	1.0662	0.002
Celf5	chr10:80921972-80945454	dbveh	dbLSDi	OK	0.238318	1.48248	2.63705	0.00205
Lilrb4	chr10:51210780-51216417	dbveh	dbLSDi	OK	154.854	84.65	-0.871332	0.0021
Ahcy	chr2:154885047-154900233	dbveh	dbLSDi	OK	14.4051	4.45775	-1.69219	0.0021
Laptm5	chr4:130469248-130492063	dbveh	dbLSDi	OK	213.554	115.685	-0.884402	0.00215
Sfpi1	chr2:90936953-90955913	dbveh	dbLSDi	OK	132.466	76.1457	-0.798792	0.00215
Sec14l2	chr11:3997042-4018732	dbveh	dbLSDi	OK	5.97979	0.844772	-2.82346	0.00215
Slc2a3	chr6:122677826-122692763	dbveh	dbLSDi	OK	3.75369	8.92121	1.24893	0.00215
Thy1	chr9:43851466-43856662	dbveh	dbLSDi	OK	31.0678	15.7362	-0.981331	0.0022
Ttpa	chr4:19935574-19957932	dbveh	dbLSDi	OK	15.0532	6.33733	-1.24812	0.0022
Elovl6	chr3:129235303-129341411	dbveh	dbLSDi	OK	11.4795	5.42408	-1.08161	0.0022
Prc1	chr7:87439350-87461145	dbveh	dbLSDi	OK	9.55196	3.15464	-1.59832	0.0022
Krt8	chr15:101827141-101834773	dbveh	dbLSDi	OK	2.41067	0.354245	-2.76662	0.0022
Slc6a13	chr6:121250313-121287736	dbveh	dbLSDi	OK	29.0192	49.9857	0.784508	0.00225
Rrm2	chr12:25393118-25399011	dbveh	dbLSDi	OK	14.4846	3.53966	-2.03283	0.00225
Proz	chr8:13060907-13075006	dbveh	dbLSDi	OK	3.21104	0.586932	-2.45178	0.00225
Actg2	chr6:83462902-83486245	dbveh	dbLSDi	OK	1.02226	5.98128	2.54869	0.00225
Ly6a	chr15:74825306-74828318	dbveh	dbLSDi	OK	107.199	178.679	0.73708	0.0023
Serpine1	chr5:137537375-137548142	dbveh	dbLSDi	OK	81.3416	147.374	0.857422	0.0023
Sbsn	chr7:31536489-31541153	dbveh	dbLSDi	OK	39.1828	81.9613	1.06472	0.0023
Osbpl8	chr10:110601857-110734303	dbveh	dbLSDi	OK	36.229	21.8382	-0.730291	0.0023
Cadm4	chr7:25267041-25289552	dbveh	dbLSDi	OK	14.0553	5.62643	-1.32082	0.0023
Osbp2	chr11:3603733-3763906	dbveh	dbLSDi	OK	0.886129	7.60482	3.10133	0.0023
Egr1	chr18:35020860-35024610	dbveh	dbLSDi	OK	19.6765	10.6656	-0.883515	0.00235
Zpbp2	chr11:98412410-98419979	dbveh	dbLSDi	OK	0.108758	2.61855	4.58958	0.0024
Hk1	chr10:61731602-61842656	dbveh	dbLSDi	OK	13.333	25.6936	0.946404	0.00245
Asrgl1	chr19:9186208-9210056	dbveh	dbLSDi	OK	8.85218	19.598	1.1466	0.00245
Gsg2	chr11:72904096-72960951	dbveh	dbLSDi	OK	1.94187	10.3956	2.42046	0.00245
Spatc1	chr15:76098518-76123002	dbveh	dbLSDi	OK	0.390498	2.90345	2.89438	0.00245
Fbln1	chr15:85036437-85116724	dbveh	dbLSDi	OK	16.5833	8.1305	-1.02831	0.0025
Emilin1	chr5:31216158-31223646	dbveh	dbLSDi	OK	25.2185	14.1213	-0.836604	0.00255
Racgap1	chr15:99450926-99482052	dbveh	dbLSDi	OK	11.4047	5.03049	-1.18086	0.00255
Aqp9	chr9:70958467-71011096	dbveh	dbLSDi	OK	4.90071	0.846294	-2.53376	0.00255
Capg	chr6:72494432-72512974	dbveh	dbLSDi	OK	323.853	177.695	-0.865932	0.0026
Pcolce	chr5:138046334-138052632	dbveh	dbLSDi	OK	58.5866	32.8615	-0.834174	0.0026
Gpc6	chr14:117324536-118378751	dbveh	dbLSDi	OK	6.48032	3.1734	-1.03003	0.0026
Fam187b	chr7:31758822-31774744	dbveh	dbLSDi	OK	0.473471	6.03605	3.67226	0.0026
Gsto2	chr19:47940034-47960795	dbveh	dbLSDi	OK	0.841267	5.05014	2.58569	0.0026
Eps8	chr6:137425765-137597641	dbveh	dbLSDi	OK	27.0699	15.3188	-0.821384	0.00265
B4galt6	chr18:20843099-20904905	dbveh	dbLSDi	OK	13.5758	7.60365	-0.836275	0.00265
Prr11	chr11:86902657-86922216	dbveh	dbLSDi	OK	3.53543	1.07931	-1.71177	0.00265
Ckb	chr12:112907565-112910549	dbveh	dbLSDi	OK	91.4756	53.7958	-0.765893	0.0027
Proc	chr18:32282779-32299224	dbveh	dbLSDi	OK	5.41919	0.760542	-2.83298	0.0027
Ccdc46	chr11:108286579-108721929	dbveh	dbLSDi	OK	1.22657	6.0467	2.30152	0.0027
Micalcl	chr7:119511821-119556618	dbveh	dbLSDi	OK	1.12586	7.83978	2.79979	0.0027
Kcnc3	chr7:51846255-51860121	dbveh	dbLSDi	OK	3.85459	8.27548	1.10227	0.00275
Myof	chr19:37973525-38118067	dbveh	dbLSDi	OK	17.5829	10.2671	-0.776139	0.0028
1700025K23Rik	chr10:38838613-38853701	dbveh	dbLSDi	OK	3.78348	26.189	2.79117	0.0028
Ccdc40	chr11:119089885-119126526	dbveh	dbLSDi	OK	0.0930105	0.568314	2.61122	0.0028
Agt	chr8:127080486-127093607	dbveh	dbLSDi	OK	70.2444	121.105	0.7858	0.00285
Klhdc7a	chr4:139518087-139523941	dbveh	dbLSDi	OK	12.907	22.9321	0.829212	0.00285
Arhgap25	chr6:87409378-87483229	dbveh	dbLSDi	OK	32.5157	18.1228	-0.843331	0.0029
Mfng	chr15:78586312-78603875	dbveh	dbLSDi	OK	31.8824	55.3686	0.796309	0.0029
Mup3	chr4:61744510-61748346	dbveh	dbLSDi	OK	16.2558	3.04023	-2.4187	0.0029
Slc16a7	chr10:124664540-124765591	dbveh	dbLSDi	OK	7.16847	17.8352	1.31499	0.0029
G0s2	chr1:195098353-195099382	dbveh	dbLSDi	OK	205.364	336.354	0.711798	0.00295
Tlr7	chrX:163742862-163768460	dbveh	dbLSDi	OK	18.9651	10.7254	-0.82232	0.00295
Slc25a13	chr6:5991217-6167173	dbveh	dbLSDi	OK	5.99724	1.71166	-1.8089	0.00295
Slc16a5	chr11:115323786-115335712	dbveh	dbLSDi	OK	1.2819	0.200615	-2.67578	0.00295
Gm949	chr18:47081468-47093876	dbveh	dbLSDi	OK	0.429473	2.50109	2.54192	0.00295
Ehhadh	chr16:21761357-21787907	dbveh	dbLSDi	OK	16.8929	8.61992	-0.970671	0.003
Gm711	chr2:26789588-26809016	dbveh	dbLSDi	OK	0.250941	1.72977	2.78516	0.003
Mmp14	chr14:55050440-55060095	dbveh	dbLSDi	OK	90.8955	54.6159	-0.734888	0.00305
Smc2	chr4:52452120-52501131	dbveh	dbLSDi	OK	6.98153	2.9608	-1.23756	0.00305
Sykb	chr13:52678805-52744161	dbveh	dbLSDi	OK	39.4925	23.3668	-0.757119	0.0031
Adam1a	chr5:121968612-121971704	dbveh	dbLSDi	OK	0.575461	3.64394	2.66271	0.0031
Plb1	chr5:32535080-32666729	dbveh	dbLSDi	OK	0.119672	2.69078	4.49087	0.0031
Cd68	chr11:69477872-69479564	dbveh	dbLSDi	OK	369.205	210.28	-0.812109	0.00315
Asgr2	chr11:69906145-69919688	dbveh	dbLSDi	OK	8.07741	1.41713	-2.51092	0.00315
Crip2	chr12:114378446-114383717	dbveh	dbLSDi	OK	101.508	166.948	0.717807	0.0032
Pde1c	chr6:56019797-56319628	dbveh	dbLSDi	OK	0.0331821	0.608529	4.19685	0.0032
Pcdh7	chr5:58109259-58523479	dbveh	dbLSDi	OK	18.0551	10.6704	-0.758796	0.00325
Agpat9	chr5:101275247-101328121	dbveh	dbLSDi	OK	17.4613	30.003	0.780944	0.00325
Marco	chr1:122371114-122401661	dbveh	dbLSDi	OK	1.90505	15.3662	3.01186	0.00325
Ccdc136	chr6:29348925-29376995	dbveh	dbLSDi	OK	0.336012	14.6841	5.4496	0.00325
Iqcd	chr5:121039031-121057122	dbveh	dbLSDi	OK	0.392367	2.64532	2.75316	0.00325
Retn	chr8:3655769-3659818	dbveh	dbLSDi	OK	654.534	1216.74	0.894481	0.00335
Fgl1	chr8:42276787-42300510	dbveh	dbLSDi	OK	5.93139	1.08774	-2.44704	0.00335
Dpy19l3	chr7:36470518-36539473	dbveh	dbLSDi	OK	4.57093	2.03257	-1.16918	0.00335
Ggnbp1	chr17:27166203-27173323	dbveh	dbLSDi	OK	2.18271	16.0869	2.8817	0.00335
Pacrg	chr17:10595877-11033057	dbveh	dbLSDi	OK	1.47089	7.97932	2.43958	0.00335
Blnk	chr19:41003416-41069025	dbveh	dbLSDi	OK	19.3056	9.17461	-1.0733	0.0034
1700001O22Rik	chr2:30651082-30659184	dbveh	dbLSDi	OK	0.28459	3.54886	3.6404	0.00345
Ms4a6c	chr19:11543857-11556686	dbveh	dbLSDi	OK	53.5749	24.06	-1.15492	0.0035
Dusp1	chr17:26642535-26645417	dbveh	dbLSDi	OK	90.7777	55.969	-0.69771	0.00355
Col5a2	chr1:45431175-45560127	dbveh	dbLSDi	OK	65.7864	38.1786	-0.785027	0.00355
Ccdc87	chr19:4839365-4842528	dbveh	dbLSDi	OK	0.171691	1.13633	2.7265	0.00355
Lat2	chr5:135076134-135090893	dbveh	dbLSDi	OK	45.5338	23.6747	-0.943594	0.00365
Itgav	chr2:83564553-83647073	dbveh	dbLSDi	OK	14.0436	8.51526	-0.721794	0.00365
Ly6c1	chr15:74875444-74879260	dbveh	dbLSDi	OK	138.595	228.589	0.72188	0.0037
1100001G20Rik	chr11:83560441-83566148	dbveh	dbLSDi	OK	116.971	238.323	1.02677	0.0037
Otub2	chr12:104615103-104644560	dbveh	dbLSDi	OK	1.83806	6.33008	1.78404	0.0037
Ppm1j	chr3:104583973-104588935	dbveh	dbLSDi	OK	0.942061	5.40146	2.51946	0.00375
Apcdd1	chr18:63081980-63112849	dbveh	dbLSDi	OK	30.7773	51.8454	0.752351	0.0038
Plvap	chr8:74021651-74035668	dbveh	dbLSDi	OK	56.2268	92.6697	0.720839	0.00385
Tlr13	chrX:103338613-103355832	dbveh	dbLSDi	OK	46.5801	27.2557	-0.773156	0.00385
Adamts12	chr15:10994544-11276622	dbveh	dbLSDi	OK	7.39923	3.66127	-1.01503	0.00385
Trim25	chr11:88860716-88881607	dbveh	dbLSDi	OK	33.2813	20.0868	-0.728464	0.0039
Cxcl14	chr13:56390005-56397912	dbveh	dbLSDi	OK	25.5451	12.8786	-0.988067	0.00395
Fbxo2	chr4:147534776-147540526	dbveh	dbLSDi	OK	0.45963	2.49211	2.43883	0.00395
C5ar1	chr7:16832091-16844889	dbveh	dbLSDi	OK	62.5191	36.5451	-0.774617	0.00405
Grap	chr11:61466822-61486279	dbveh	dbLSDi	OK	28.247	48.6442	0.784168	0.00405
Apobr	chr7:133728521-133732606	dbveh	dbLSDi	OK	20.2164	11.4557	-0.819456	0.00405
Efhc1	chr1:20941706-20980922	dbveh	dbLSDi	OK	1.1195	6.88017	2.61959	0.00405
Apbb1ip	chr2:22629846-22731173	dbveh	dbLSDi	OK	57.4938	34.7858	-0.724907	0.0041
Cabyr	chr18:12899863-12913651	dbveh	dbLSDi	OK	0.785441	22.4079	4.83436	0.0041
Tex14	chr11:87218566-87369325	dbveh	dbLSDi	OK	0.121448	0.685859	2.49757	0.00415
Col1a2	chr6:4455696-4491543	dbveh	dbLSDi	OK	514.948	133.57	-1.94683	0.0042
Dtx4	chr19:12540825-12576486	dbveh	dbLSDi	OK	22.5659	13.8492	-0.704336	0.0042
Frat1	chr19:41904459-41907073	dbveh	dbLSDi	OK	2.03298	6.7589	1.73319	0.0042
A530016L24Rik	chr12:113727658-113738138	dbveh	dbLSDi	OK	37.1077	59.9541	0.692139	0.00425
Isg20	chr7:86058650-86065282	dbveh	dbLSDi	OK	18.8953	43.4661	1.20187	0.00425
Ifi30	chr8:73286671-73290562	dbveh	dbLSDi	OK	125.851	75.2763	-0.741449	0.0043
C3ar1	chr6:122797157-122806175	dbveh	dbLSDi	OK	62.2527	36.3713	-0.775337	0.0044
Abat	chr16:8513521-8621660	dbveh	dbLSDi	OK	12.1266	22.0646	0.863561	0.0044
Abcb4	chr5:8893720-8959226	dbveh	dbLSDi	OK	8.40695	3.83413	-1.13268	0.0044
Slc4a1	chr11:102210133-102226595	dbveh	dbLSDi	OK	0.874073	5.70744	2.70702	0.0044
Prss23	chr7:96656294-96666096	dbveh	dbLSDi	OK	56.3516	34.867	-0.692594	0.00445
Npy	chr6:49772727-49779504	dbveh	dbLSDi	OK	35.858	6.97244	-2.36256	0.0045
Rgs2	chr1:145846467-145851279	dbveh	dbLSDi	OK	14.0623	7.24807	-0.95616	0.0045
Olfml2b	chr1:172574662-172612920	dbveh	dbLSDi	OK	11.3603	5.24169	-1.1159	0.0045
Zfp451	chr1:33818597-33871272	dbveh	dbLSDi	OK	5.30351	11.1342	1.06999	0.0045
Fads1	chr19:10257377-10271362	dbveh	dbLSDi	OK	38.3105	23.794	-0.687143	0.0046
Gpc1	chr1:94728262-94756773	dbveh	dbLSDi	OK	25.4972	42.896	0.750507	0.0046
Aqp11	chr7:104874888-104886757	dbveh	dbLSDi	OK	4.3962	14.3765	1.70938	0.0046
Gas1	chr13:60275765-60278896	dbveh	dbLSDi	OK	35.5086	21.5183	-0.722601	0.00465
6030429G01Rik	chr7:4474558-4484044	dbveh	dbLSDi	OK	0.543872	2.78475	2.35621	0.00465
Pik3ap1	chr19:41348707-41459560	dbveh	dbLSDi	OK	19.7015	10.3469	-0.929101	0.0047
Vav1	chr17:57418522-57468659	dbveh	dbLSDi	OK	13.2771	7.09908	-0.903235	0.0047
Aurkb	chr11:68859144-68865164	dbveh	dbLSDi	OK	8.55617	2.68906	-1.66986	0.0047
Havcr2	chr11:46268432-46294756	dbveh	dbLSDi	OK	8.53015	3.24546	-1.39415	0.0047
Aldh3b2	chr19:3972327-3981665	dbveh	dbLSDi	OK	7.47498	16.3152	1.12607	0.0047
1810011O10Rik	chr8:25548087-25549418	dbveh	dbLSDi	OK	30.0669	53.471	0.830583	0.0048
Mfap4	chr11:61298945-61302206	dbveh	dbLSDi	OK	26.9354	11.8772	-1.18131	0.0049
Flnc	chr6:29383152-29411888	dbveh	dbLSDi	OK	4.96737	2.60995	-0.928462	0.0049
D0H4S114	chr18:33596672-33623683	dbveh	dbLSDi	OK	21.2113	10.5423	-1.00864	0.00495
Ccdc96	chr5:36827236-36830820	dbveh	dbLSDi	OK	0.349439	1.91615	2.4551	0.00495
D3Bwg0562e	chr3:117022062-117063794	dbveh	dbLSDi	OK	2.96612	6.63802	1.16218	0.00505
4930505A04Rik	chr11:30326005-30371829	dbveh	dbLSDi	OK	0.884485	6.84577	2.9523	0.00505
Rcl1	chr19:29175864-29218333	dbveh	dbLSDi	OK	19.957	35.3845	0.826224	0.0051
Zim1	chr7:6628153-6649143	dbveh	dbLSDi	OK	1.91932	6.60849	1.78373	0.00515
Irak2	chr6:113588460-113645020	dbveh	dbLSDi	OK	46.3405	74.9885	0.694396	0.00525
Aass	chr6:23022172-23082986	dbveh	dbLSDi	OK	4.51264	0.747546	-2.59374	0.00525
Clic1	chr17:35187187-35195664	dbveh	dbLSDi	OK	222.728	136.329	-0.708192	0.00535
Trim67	chr8:127316918-127358604	dbveh	dbLSDi	OK	6.96804	11.7404	0.752655	0.00535
St3gal5	chr6:72047606-72104564	dbveh	dbLSDi	OK	30.775	17.4106	-0.821794	0.0054
Napsa	chr7:51827814-51842216	dbveh	dbLSDi	OK	22.7324	9.46922	-1.26343	0.0054
C1qtnf6	chr15:78353775-78360081	dbveh	dbLSDi	OK	30.5661	17.3648	-0.815771	0.00545
Acrbp	chr6:124999944-125013283	dbveh	dbLSDi	OK	2.71756	11.9065	2.13136	0.00545
Ear11	chr14:51874936-51875787	dbveh	dbLSDi	OK	18.5692	49.8754	1.42542	0.0055
Spaca1	chr4:34115288-34137042	dbveh	dbLSDi	OK	5.53255	17.0571	1.62436	0.00555
Cdk18	chr1:134010123-134036262	dbveh	dbLSDi	OK	15.8997	7.9668	-0.996924	0.0056
Ccnf	chr17:24360176-24388354	dbveh	dbLSDi	OK	3.82499	1.29003	-1.56805	0.00565
Pzp	chr6:128388774-128476738	dbveh	dbLSDi	OK	10.0475	0.350203	-4.84251	0.0057
Gchfr	chr2:118993523-118998125	dbveh	dbLSDi	OK	9.72265	1.61793	-2.5872	0.0057
Sh3bgrl3	chr4:133683320-133684668	dbveh	dbLSDi	OK	525.536	320.244	-0.714621	0.00575
Efhd2	chr4:141414056-141430835	dbveh	dbLSDi	OK	99.1565	61.594	-0.686918	0.00575
Lilrb3	chr7:3664106-3671984	dbveh	dbLSDi	OK	44.3435	26.5346	-0.740847	0.00575
Acad11	chr9:103966032-104029976	dbveh	dbLSDi	OK	33.2543	54.0411	0.700515	0.00575
Atp6v0e2	chr6:48487567-48491799	dbveh	dbLSDi	OK	20.9371	36.9217	0.818408	0.0058
Nos3	chr5:23870636-23897961	dbveh	dbLSDi	OK	8.3138	15.05	0.856179	0.00585
Mex3d	chr10:79843099-79850396	dbveh	dbLSDi	OK	7.03567	14.0372	0.996496	0.00585
Ribc1	chrX:148439126-148450838	dbveh	dbLSDi	OK	0.4978	3.40328	2.77328	0.00585
Piwil2	chr14:70772286-70828901	dbveh	dbLSDi	OK	0.327674	1.4869	2.18198	0.0059
Bmp3	chr5:99283457-99309979	dbveh	dbLSDi	OK	10.8943	18.9509	0.798685	0.00595
Slpi	chr2:164179805-164182243	dbveh	dbLSDi	OK	22.1073	3.72349	-2.56979	0.006
Cpe	chr8:67071348-67171837	dbveh	dbLSDi	OK	30.6533	17.7121	-0.791311	0.0061
Fmo5	chr3:97432726-97459210	dbveh	dbLSDi	OK	15.3816	7.78988	-0.981534	0.0061
Lrrc27	chr7:146289536-146428872	dbveh	dbLSDi	OK	9.61118	20.8011	1.11387	0.0061
Snx5	chr2:144075858-144096638	dbveh	dbLSDi	OK	91.0914	56.4655	-0.689947	0.00615
Stmn1	chr4:134024234-134029758	dbveh	dbLSDi	OK	29.59	13.1395	-1.1712	0.00615
Sh3bp2	chr5:34868432-34906288	dbveh	dbLSDi	OK	28.5602	16.5371	-0.788297	0.00615
Atp7a	chrX:103222614-103323499	dbveh	dbLSDi	OK	11.5995	6.9654	-0.735786	0.00615
Irf5	chr6:29476732-29487319	dbveh	dbLSDi	OK	57.2073	34.8072	-0.716812	0.0062
Gm11837	chr4:14857787-15076278	dbveh	dbLSDi	OK	2.17645	20.1008	3.20721	0.0062
Marcks	chr10:36853048-36858732	dbveh	dbLSDi	OK	49.1548	31.3333	-0.649637	0.00625
Wwp1	chr4:19536819-19636140	dbveh	dbLSDi	OK	42.8625	27.1121	-0.660778	0.00625
Hs6st1	chr1:36125244-36163291	dbveh	dbLSDi	OK	31.7698	19.9779	-0.669253	0.00625
Dpep2	chr8:108508956-108520323	dbveh	dbLSDi	OK	28.1823	14.4861	-0.960125	0.00625
Lmnb1	chr18:56867466-56913079	dbveh	dbLSDi	OK	9.14115	4.12404	-1.14832	0.0063
Fhl2	chr1:43179918-43220806	dbveh	dbLSDi	OK	9.02405	3.05743	-1.56146	0.0063
Sqle	chr15:59146646-59162748	dbveh	dbLSDi	OK	18.7642	10.3507	-0.858259	0.00635
Kcnn4	chr7:25155281-25170231	dbveh	dbLSDi	OK	24.4404	12.2542	-0.995992	0.0064
Hgd	chr16:37580238-37632112	dbveh	dbLSDi	OK	8.44486	0.606959	-3.7984	0.0064
Tmem56	chr3:120904927-120966234	dbveh	dbLSDi	OK	1.81142	0.404184	-2.16403	0.0064
Pld6	chr11:59597394-59601159	dbveh	dbLSDi	OK	0.320924	1.43506	2.16081	0.0065
Nudt18	chr14:70977653-70982378	dbveh	dbLSDi	OK	19.9796	31.3959	0.652044	0.00655
Ccna2	chr3:36451527-36470918	dbveh	dbLSDi	OK	11.6481	3.06776	-1.92484	0.00655
BC021767	chr3:94464510-94471074	dbveh	dbLSDi	OK	0.189812	0.862876	2.18458	0.00655
Mfap5	chr6:122463693-122479305	dbveh	dbLSDi	OK	102.047	62.3782	-0.710126	0.0066
Fnip2	chr3:79149297-79371601	dbveh	dbLSDi	OK	23.831	14.3304	-0.733756	0.0066
Gbp3	chr3:142223015-142236176	dbveh	dbLSDi	OK	7.22425	14.3783	0.992977	0.0067
Rcn1	chr2:105226104-105239476	dbveh	dbLSDi	OK	16.6299	9.08125	-0.872814	0.0068
Bcat1	chr6:144942354-145024677	dbveh	dbLSDi	OK	3.6331	1.33084	-1.44886	0.0068
Krt7	chr15:101242833-101258237	dbveh	dbLSDi	OK	1.88575	0.395476	-2.25348	0.0068
Adssl1	chr12:113858257-113879566	dbveh	dbLSDi	OK	52.185	30.4682	-0.776329	0.00685
Agxt2l1	chr3:130320365-130338668	dbveh	dbLSDi	OK	2.18124	0.107482	-4.34298	0.00685
P2ry6	chr7:108086147-108112880	dbveh	dbLSDi	OK	33.8048	19.0772	-0.82538	0.0069
Ubd	chr17:37330836-37333046	dbveh	dbLSDi	OK	109.469	62.5486	-0.807478	0.00695
Gatsl3	chr11:4118253-4122412	dbveh	dbLSDi	OK	11.9758	25.5776	1.09476	0.007
Col15a1	chr4:47220883-47326037	dbveh	dbLSDi	OK	143.863	85.4922	-0.750827	0.00705
Osbpl10	chr9:114976396-115141341	dbveh	dbLSDi	OK	0.991568	4.71875	2.25062	0.00705
Oxtr	chr6:112423677-112439802	dbveh	dbLSDi	OK	72.2247	121.446	0.749749	0.0071
Kif26a	chr12:113384418-113419958	dbveh	dbLSDi	OK	4.0728	7.19064	0.8201	0.0071
Cd300lg	chr11:101902824-101916931	dbveh	dbLSDi	OK	118.615	194.823	0.715875	0.00715
B3galt2	chr1:145454628-145549814	dbveh	dbLSDi	OK	16.0432	27.7544	0.790756	0.00715
Mtap7	chr10:19868725-20001396	dbveh	dbLSDi	OK	8.55978	15.0179	0.811033	0.00715
Hcls1	chr16:36935068-36963300	dbveh	dbLSDi	OK	57.4595	35.2874	-0.703395	0.0072
Shisa2	chr14:60244117-60250497	dbveh	dbLSDi	OK	0.604271	2.87498	2.25028	0.0072
Itgb2	chr10:76993092-77028419	dbveh	dbLSDi	OK	182.738	107.044	-0.77158	0.00725
Tubb5	chr17:35970864-35975246	dbveh	dbLSDi	OK	158.568	96.2229	-0.720647	0.00725
Arhgap11a	chr2:113671649-113688818	dbveh	dbLSDi	OK	8.55469	4.47069	-0.936219	0.0073
Aldoart2	chr12:56666121-56667696	dbveh	dbLSDi	OK	0.169993	11.7652	6.11291	0.0073
Myom3	chr4:135315629-135371479	dbveh	dbLSDi	OK	0.960878	2.94735	1.61699	0.0073
Pld3	chr7:28317036-28338131	dbveh	dbLSDi	OK	157.023	97.4374	-0.688431	0.00735
Tubb6	chr18:67550384-67562403	dbveh	dbLSDi	OK	79.7876	49.5027	-0.688658	0.00755
Mcm5	chr8:77633426-77652338	dbveh	dbLSDi	OK	7.79855	3.03121	-1.36331	0.00755
Folr2	chr7:108988501-109005708	dbveh	dbLSDi	OK	92.1866	57.3939	-0.68366	0.0076
Wnt2b	chr3:104747722-104764627	dbveh	dbLSDi	OK	2.37549	0.475276	-2.32139	0.0076
H2-Q6	chr17:35561821-35565306	dbveh	dbLSDi	OK	60.0916	99.296	0.724573	0.00765
Cilp	chr9:65112986-65128412	dbveh	dbLSDi	OK	21.5558	13.04	-0.725125	0.00765
Lca5l	chr16:96380012-96413864	dbveh	dbLSDi	OK	0.512224	2.49301	2.28304	0.00765
Gbp9	chr5:105507412-105539311	dbveh	dbLSDi	OK	5.92032	10.9968	0.893333	0.0077
Tpx2	chr2:152673699-152721057	dbveh	dbLSDi	OK	7.55614	2.82606	-1.41886	0.00775
9530077C05Rik	chr9:22216020-22249123	dbveh	dbLSDi	OK	0.279108	1.22664	2.13581	0.00775
Ckap4	chr10:83989049-83996633	dbveh	dbLSDi	OK	36.8103	22.9392	-0.682295	0.0078
Pfkl	chr10:77449693-77472541	dbveh	dbLSDi	OK	20.4862	32.2109	0.652895	0.0078
Adam19	chr11:45869488-45960844	dbveh	dbLSDi	OK	8.01932	4.51381	-0.829134	0.0078
Coro1a	chr7:133843287-133848268	dbveh	dbLSDi	OK	41.6768	24.0364	-0.794022	0.00785
Plin5	chr17:56251023-56256971	dbveh	dbLSDi	OK	7.45769	17.3795	1.22059	0.00785
Col18a1	chr10:76514923-76629275	dbveh	dbLSDi	OK	68.0333	43.334	-0.650742	0.0079
Plod1	chr4:147283861-147310885	dbveh	dbLSDi	OK	63.2159	41.2982	-0.614208	0.008
Gm5617	chr9:48303449-48304077	dbveh	dbLSDi	OK	15.8789	51.8084	1.70608	0.008
Limk2	chr11:3243299-3309238	dbveh	dbLSDi	OK	11.0281	18.2971	0.730431	0.008
Pif1	chr9:65435011-65443769	dbveh	dbLSDi	OK	1.34739	0.308049	-2.12893	0.008
Mafb	chr2:160189412-160192801	dbveh	dbLSDi	OK	79.8145	50.1034	-0.671742	0.00805
Khk	chr5:31224267-31233619	dbveh	dbLSDi	OK	31.4068	11.5363	-1.4449	0.00805
Spata24	chr18:35816342-35821840	dbveh	dbLSDi	OK	6.18954	24.3142	1.97389	0.00815
Car4	chr11:84771255-84779556	dbveh	dbLSDi	OK	55.6059	88.2904	0.667018	0.0082
Pgp	chr17:24607417-24608541	dbveh	dbLSDi	OK	34.8717	62.5507	0.842971	0.0082
Asprv1	chr6:86578167-86579698	dbveh	dbLSDi	OK	1.72003	0.373185	-2.20447	0.0082
Hrasls	chr16:29209780-29230616	dbveh	dbLSDi	OK	0.4165	1.80373	2.11459	0.0082
Ms4a7	chr19:11395897-11410606	dbveh	dbLSDi	OK	32.556	12.9661	-1.32818	0.00825
Acer3	chr7:105362169-105458037	dbveh	dbLSDi	OK	12.411	6.74888	-0.878903	0.00825
Ckap2l	chr2:129093945-129122948	dbveh	dbLSDi	OK	4.12511	1.47021	-1.48841	0.00835
Arhgap30	chr1:173319090-173340370	dbveh	dbLSDi	OK	27.0676	17.1283	-0.660184	0.0084
Gm6268	chrX:33943471-33944649	dbveh	dbLSDi	OK	0	1.50291	inf	0.0084
Krt5	chr15:101537500-101543322	dbveh	dbLSDi	OK	0	0.0952751	inf	0.00845
Tmem179	chr12:113738394-113749371	dbveh	dbLSDi	OK	18.6101	31.755	0.7709	0.0085
Hmga1	chr17:27693518-27700617	dbveh	dbLSDi	OK	30.2084	16.3434	-0.886241	0.00855
Fstl3	chr10:79240018-79251730	dbveh	dbLSDi	OK	18.4848	32.0794	0.795313	0.00855
Lass4	chr8:4493404-4526079	dbveh	dbLSDi	OK	11.7703	19.4796	0.726807	0.0086
Ankrd42	chr7:99732692-99785652	dbveh	dbLSDi	OK	1.92499	5.77525	1.58504	0.0086
Sdc3	chr4:130348451-130382233	dbveh	dbLSDi	OK	83.3593	50.2831	-0.729269	0.0087
Atp6v1a	chr16:44085516-44139132	dbveh	dbLSDi	OK	91.6621	59.2716	-0.628983	0.00875
Cxcr4	chr1:130484775-130488876	dbveh	dbLSDi	OK	32.8028	19.3262	-0.763262	0.00875
Lama2	chr10:26701091-27336748	dbveh	dbLSDi	OK	9.81434	6.13199	-0.678535	0.00875
Magi1	chr6:93625448-94233898	dbveh	dbLSDi	OK	4.16406	7.23786	0.797573	0.00875
1700023F02Rik	chr10:65583356-65586812	dbveh	dbLSDi	OK	0	0.768662	inf	0.00885
Arsb	chr13:94541633-94712971	dbveh	dbLSDi	OK	22.8954	14.2112	-0.688028	0.00895
Kcnj8	chr6:142513458-142519876	dbveh	dbLSDi	OK	7.78357	16.174	1.05518	0.00895
Klk1b7-ps	chr7:51200381-51201297	dbveh	dbLSDi	OK	0	1.25067	inf	0.00895
Mtap2	chr1:66221902-66489157	dbveh	dbLSDi	OK	0.151349	0.918085	2.60075	0.00895
Col3a1	chr1:45368382-45406551	dbveh	dbLSDi	OK	911.922	234.325	-1.9604	0.009
Tpd52	chr3:8929435-9004515	dbveh	dbLSDi	OK	51.1039	31.9869	-0.675952	0.009
Oscp1	chr4:125735808-125766578	dbveh	dbLSDi	OK	2.95001	8.95198	1.60149	0.00905
Tmem119	chr5:114243737-114250361	dbveh	dbLSDi	OK	30.5602	18.3399	-0.736669	0.0091
Pstpip1	chr9:55937782-55976697	dbveh	dbLSDi	OK	27.3109	15.1157	-0.853428	0.0091
Hk3	chr13:55050792-55122746	dbveh	dbLSDi	OK	24.4132	13.5086	-0.853785	0.0091
Rasd1	chr11:59761715-59778444	dbveh	dbLSDi	OK	25.1155	51.5201	1.03656	0.00915
Il15ra	chr2:11627162-11655589	dbveh	dbLSDi	OK	18.695	35.0161	0.905369	0.00915
Ppm1d	chr11:85124755-85160573	dbveh	dbLSDi	OK	7.38842	13.999	0.921986	0.00915
Tppp	chr13:74146866-74173201	dbveh	dbLSDi	OK	2.83578	5.69958	1.00711	0.00915
1700080N15Rik	chr2:4053110-4062187	dbveh	dbLSDi	OK	0	1.43943	inf	0.00915
1700036G14Rik	chr3:85121440-85135949	dbveh	dbLSDi	OK	0	0.80295	inf	0.00915
Srebf2	chr15:81977698-82035390	dbveh	dbLSDi	OK	21.7642	13.6141	-0.67686	0.0092
Alppl2	chr1:88983265-88986503	dbveh	dbLSDi	OK	0	0.0697523	inf	0.0092
1700025F24Rik	chr10:118850499-118863920	dbveh	dbLSDi	OK	0	0.416534	inf	0.0092
Tm7sf4	chr15:39577477-39592480	dbveh	dbLSDi	OK	5.1975	1.11459	-2.22131	0.00925
1700001F09Rik	chr14:44020916-44026344	dbveh	dbLSDi	OK	0	0.370949	inf	0.00925
4933406F09Rik	chr14:8244986-8255199	dbveh	dbLSDi	OK	0	0.285266	inf	0.00925
Ushbp1	chr8:73908172-73919700	dbveh	dbLSDi	OK	15.6058	25.0962	0.685383	0.0093
Sc4mol	chr8:67196941-67212375	dbveh	dbLSDi	OK	35.5535	21.1625	-0.74848	0.00935
Ccl8	chr11:81928686-81930301	dbveh	dbLSDi	OK	151.048	260.265	0.78497	0.0094
Ptprj	chr2:90269912-90420804	dbveh	dbLSDi	OK	13.2647	8.32245	-0.672506	0.0094
Gabra3	chrX:69678014-69901585	dbveh	dbLSDi	OK	5.08471	2.1466	-1.24411	0.0095
Cenpa	chr5:30969274-30977199	dbveh	dbLSDi	OK	19.0008	7.81828	-1.28114	0.00965
Bcam	chr7:20341486-20355881	dbveh	dbLSDi	OK	13.1789	22.7222	0.785876	0.00965
1700067G17Rik	chr1:90912687-90918785	dbveh	dbLSDi	OK	0	0.718177	inf	0.0097
Rassf2	chr2:131818585-131855724	dbveh	dbLSDi	OK	29.5586	18.9679	-0.640017	0.00975
Cchcr1	chr17:35654060-35667960	dbveh	dbLSDi	OK	3.1417	7.64467	1.28291	0.00975
Lbh	chr17:73267644-73291286	dbveh	dbLSDi	OK	30.3611	18.8793	-0.685419	0.0098
Mtap1a	chr2:121115337-121176749	dbveh	dbLSDi	OK	7.30896	3.49959	-1.06248	0.0098
Il10ra	chr9:45061921-45077229	dbveh	dbLSDi	OK	15.2175	8.74662	-0.798931	0.00985
Gm5458	chr14:20413359-20421809	dbveh	dbLSDi	OK	0	0.409767	inf	0.00985
Cyp2d22	chr15:82200956-82210690	dbveh	dbLSDi	OK	22.7358	36.4651	0.68155	0.0099
Peg10	chr6:4697305-4710516	dbveh	dbLSDi	OK	4.10407	7.27999	0.82688	0.0099
1700065I16Rik	chr15:63648742-63651095	dbveh	dbLSDi	OK	0	0.58525	inf	0.0099
Hebp1	chr6:135087536-135118233	dbveh	dbLSDi	OK	143.363	222.352	0.633172	0.00995
Man2a1	chr17:64950988-65104450	dbveh	dbLSDi	OK	59.0722	37.9104	-0.639885	0.00995

## Sheet: B - dbVeh_vs_leanVeh
gene_id	locus	sample_1	sample_2	status	value_1	value_2	log2(fold_change)	p_value_dbVeh_vs_leanVeh
Postn	chr3:54165028-54194963	leanveh	dbveh	OK	58.7601	376.553	2.67994	5e-05
Lum	chr10:97028134-97035337	leanveh	dbveh	OK	37.429	140.722	1.91062	5e-05
Bhmt	chr13:94386845-94407713	leanveh	dbveh	OK	4.40801	130.643	4.88936	5e-05
Arg1	chr10:24635012-24647276	leanveh	dbveh	OK	3.61816	131.016	5.17835	5e-05
Adam8	chr7:147164839-147178387	leanveh	dbveh	OK	3.98607	128.84	5.01447	5e-05
Ahsg	chr16:22892114-22899511	leanveh	dbveh	OK	12.4193	115.562	3.21801	5e-05
Emr1	chr17:57498108-57622952	leanveh	dbveh	OK	9.99096	109.649	3.45613	5e-05
Mat1a	chr14:41918669-41937701	leanveh	dbveh	OK	1.65559	72.8384	5.45929	5e-05
Cyp4a10	chr4:115190891-115206254	leanveh	dbveh	OK	1.51161	72.275	5.57933	5e-05
Qpct	chr17:79451245-79489583	leanveh	dbveh	OK	11.6015	59.639	2.36194	5e-05
Igfbp3	chr11:7106095-7113926	leanveh	dbveh	OK	15.5753	57.1814	1.87629	5e-05
Cyp4a14	chr4:115158804-115168746	leanveh	dbveh	OK	0.917134	56.441	5.94347	5e-05
Gc	chr5:89846535-89886923	leanveh	dbveh	OK	3.16369	51.739	4.03157	5e-05
Fgg	chr3:82811817-82818971	leanveh	dbveh	OK	4.26725	50.0525	3.55206	5e-05
Myo1e	chr9:70055156-70247874	leanveh	dbveh	OK	8.60279	42.8014	2.31478	5e-05
Azgp1	chr5:138422748-138431460	leanveh	dbveh	OK	4.04087	41.1506	3.34818	5e-05
Loxl2	chr14:70009282-70095641	leanveh	dbveh	OK	9.2932	41.1807	2.14772	5e-05
Slc25a47	chr12:110089338-110095025	leanveh	dbveh	OK	4.65988	36.4825	2.96884	5e-05
Gstm5	chr3:107680147-107701603	leanveh	dbveh	OK	407.552	30.2569	-3.75165	5e-05
Fyb	chr15:6529870-6613312	leanveh	dbveh	OK	4.24567	30.3671	2.83844	5e-05
Fbn1	chr2:125126329-125332174	leanveh	dbveh	OK	8.10022	27.3176	1.7538	5e-05
St6galnac2	chr11:116538018-116555974	leanveh	dbveh	OK	40.04	8.37475	-2.25732	5e-05
4930579G22Rik	chr5:130384409-130387151	leanveh	dbveh	OK	39.4948	2.21191	-4.1583	5e-05
Dbil5	chr11:76031114-76032167	leanveh	dbveh	OK	119.163	1.76157	-6.07993	5e-05
Pgam2	chr11:5701639-5703799	leanveh	dbveh	OK	61.9485	1.40551	-5.46191	5e-05
4732415M23Rik	chr8:125736757-125745945	leanveh	dbveh	OK	71.2559	1.23606	-5.84918	5e-05
Mlf1	chr3:67178018-67203922	leanveh	dbveh	OK	47.2765	1.18231	-5.32145	5e-05
Oaz3	chr3:94237087-94240538	leanveh	dbveh	OK	53.8249	0.75167	-6.16203	5e-05
Fhl4	chr10:84559763-84565240	leanveh	dbveh	OK	73.3636	0.478077	-7.26168	5e-05
Fam71e1	chr7:51751957-51756504	leanveh	dbveh	OK	25.6425	0.78021	-5.03853	5e-05
Spata3	chr1:87918516-87926533	leanveh	dbveh	OK	26.2392	0.489347	-5.74472	5e-05
Ggn	chr7:29955228-29958952	leanveh	dbveh	OK	27.7347	1.05064	-4.72236	5e-05
Tbata	chr10:60634711-60651589	leanveh	dbveh	OK	12.1982	0.379369	-5.00692	5e-05
1700019D03Rik	chr1:52981970-53009684	leanveh	dbveh	OK	17.6539	0.656718	-4.74857	5e-05
Rsph1	chr17:31391964-31414301	leanveh	dbveh	OK	56.8094	0.663977	-6.41885	5e-05
1700026L06Rik	chr2:28547599-28555171	leanveh	dbveh	OK	19.9989	0.659958	-4.92141	5e-05
Lrrc46	chr11:96895915-96902683	leanveh	dbveh	OK	32.926	0.354221	-6.53843	5e-05
Klhl10	chr11:100303237-100318338	leanveh	dbveh	OK	16.0586	0.25755	-5.96235	5e-05
1700003E16Rik	chr6:83106397-83112969	leanveh	dbveh	OK	31.314	0.271427	-6.8501	5e-05
BC049762	chr11:51067152-51076453	leanveh	dbveh	OK	10.7497	0.645649	-4.0574	5e-05
Aard	chr15:51871652-51877269	leanveh	dbveh	OK	31.3482	0.372937	-6.39331	5e-05
Ccdc92	chr5:125314801-125342591	leanveh	dbveh	OK	24.5308	0.496024	-5.62804	5e-05
Pmfbp1	chr8:112017926-112066542	leanveh	dbveh	OK	13.2263	0.114176	-6.856	5e-05
Trim17	chr11:58777282-58785231	leanveh	dbveh	OK	8.38485	0.259991	-5.01125	5e-05
1700028J19Rik	chr7:51485299-51491492	leanveh	dbveh	OK	23.1656	0.420502	-5.78373	5e-05
Slc22a14	chr9:119078573-119099511	leanveh	dbveh	OK	6.48085	0.516932	-3.64814	5e-05
Ccdc89	chr7:97574821-97577174	leanveh	dbveh	OK	8.03401	0.404769	-4.31095	5e-05
Ttll13	chr7:87391261-87405707	leanveh	dbveh	OK	13.8357	0.284662	-5.603	5e-05
Rnf32	chr5:29524545-29551831	leanveh	dbveh	OK	24.5938	0.514379	-5.57932	5e-05
Bspry	chr4:62141100-62158332	leanveh	dbveh	OK	40.3672	0.209985	-7.58675	5e-05
1700061G19Rik	chr17:57015055-57028261	leanveh	dbveh	OK	6.35232	0.259117	-4.61561	5e-05
Adam5	chr8:25843456-25934841	leanveh	dbveh	OK	16.6439	0.187936	-6.4686	5e-05
1700030J22Rik	chr8:119493498-119502843	leanveh	dbveh	OK	9.81856	0.361957	-4.76162	5e-05
Ccdc65	chr15:98538657-98553764	leanveh	dbveh	OK	18.0563	0.225264	-6.32474	5e-05
Sox30	chr11:45793811-45831494	leanveh	dbveh	OK	5.86879	0.129006	-5.50755	5e-05
BC061194	chr2:18620648-18671232	leanveh	dbveh	OK	8.63803	0.128511	-6.07074	5e-05
Spata9	chr13:76105186-76136416	leanveh	dbveh	OK	5.58805	0.283695	-4.29993	5e-05
Dnahc8	chr17:30763880-31012209	leanveh	dbveh	OK	24.1263	0.288029	-6.38825	5e-05
4930579J09Rik	chr19:10548746-10557387	leanveh	dbveh	OK	7.44942	0.168444	-5.46679	5e-05
Fank1	chr7:140968573-141073215	leanveh	dbveh	OK	15.8151	0.305635	-5.69335	5e-05
Cldn11	chr3:31048841-31063248	leanveh	dbveh	OK	39.9594	0.219088	-7.51088	5e-05
Ubxn10	chr4:138274440-138281166	leanveh	dbveh	OK	13.7596	0.327125	-5.39445	5e-05
Gm4787	chr12:82477977-82480473	leanveh	dbveh	OK	3.12665	0.101204	-4.94928	5e-05
Stag3	chr5:138721736-138753621	leanveh	dbveh	OK	13.5575	0.31038	-5.44891	5e-05
C530008M17Rik	chr5:77269623-77302579	leanveh	dbveh	OK	9.60117	0.0722586	-7.0539	5e-05
Chl1	chr6:103460869-103683029	leanveh	dbveh	OK	5.45663	0.285717	-4.25535	5e-05
Mycbpap	chr11:94362660-94382816	leanveh	dbveh	OK	7.33416	0.0818034	-6.48633	5e-05
Ccdc42	chr11:68400538-68411453	leanveh	dbveh	OK	11.6141	0.278109	-5.38408	5e-05
Amac1	chr11:69573386-69575346	leanveh	dbveh	OK	4.13535	0.149041	-4.79423	5e-05
Kif27	chr13:58388876-58456223	leanveh	dbveh	OK	6.87429	0.121595	-5.82106	5e-05
Lpar3	chr3:145883924-145949178	leanveh	dbveh	OK	5.02541	0.31931	-3.97621	5e-05
Ttc21a	chr9:119846723-119876911	leanveh	dbveh	OK	8.7365	0.0470971	-7.53527	5e-05
Hipk4	chr7:28308279-28316193	leanveh	dbveh	OK	5.65259	0.187493	-4.914	5e-05
Nsun7	chr5:66651363-66689255	leanveh	dbveh	OK	6.60793	0.253165	-4.70605	5e-05
Efhb	chr17:53538213-53602646	leanveh	dbveh	OK	3.1497	0.0951167	-5.04937	5e-05
Lrp2bp	chr8:47095955-47114830	leanveh	dbveh	OK	2.48218	0.0507074	-5.61327	5e-05
Sycp2	chr2:178080000-178142363	leanveh	dbveh	OK	4.88353	0.140878	-5.11541	5e-05
Asb15	chr6:24478143-24523164	leanveh	dbveh	OK	0.940753	0.0559181	-4.07243	5e-05
Galnt3	chr2:65920822-65962850	leanveh	dbveh	OK	14.6547	0.0683488	-7.74423	5e-05
Trank1	chr9:111214242-111298279	leanveh	dbveh	OK	9.41034	0.0410221	-7.8417	5e-05
Wdr52	chr16:44394911-44482541	leanveh	dbveh	OK	6.87144	0.0414149	-7.37432	5e-05
Nceh1	chr3:27081925-27143833	leanveh	dbveh	OK	5.80832	49.1319	3.08047	5e-05
Phf7	chr14:32050881-32064404	leanveh	dbveh	OK	69.4027	4.28806	-4.01659	5e-05
Ccdc19	chr1:174451260-174480937	leanveh	dbveh	OK	19.0434	0.832615	-4.5155	5e-05
1700102P08Rik	chr9:108295164-108300098	leanveh	dbveh	OK	11.446	0.259644	-5.46217	5e-05
Eno4	chr19:59017914-59045911	leanveh	dbveh	OK	5.90272	0.108896	-5.76036	5e-05
Lcp1	chr14:75536231-75630610	leanveh	dbveh	OK	21.5788	198.776	3.20346	5e-05
Nckap1l	chr15:103284255-103329231	leanveh	dbveh	OK	8.21208	71.0506	3.11303	5e-05
Hpd	chr5:123621815-123632695	leanveh	dbveh	OK	4.22355	37.5668	3.15293	5e-05
Ccr5	chr9:124036281-124041922	leanveh	dbveh	OK	3.92167	34.5213	3.13795	5e-05
Prune2	chr19:17030607-17298422	leanveh	dbveh	OK	1.03882	6.035	2.53841	5e-05
Ak8	chr2:28555680-28668685	leanveh	dbveh	OK	23.0629	0.901626	-4.6769	5e-05
Stat4	chr1:52065087-52164028	leanveh	dbveh	OK	10.8956	0.465835	-4.54778	5e-05
Ttc39a	chr4:109079704-109117350	leanveh	dbveh	OK	14.5867	0.59603	-4.61312	5e-05
Enkur	chr2:21102357-21126992	leanveh	dbveh	OK	16.218	0.375987	-5.43077	5e-05
Tmem146	chr17:56767565-56803879	leanveh	dbveh	OK	4.46412	0.116151	-5.26431	5e-05
Col1a1	chr11:94797583-94813170	leanveh	dbveh	OK	62.3486	607.985	3.28561	5e-05
Cd300ld	chr11:114843760-114851200	leanveh	dbveh	OK	4.81871	32.2441	2.74231	5e-05
Dcbld2	chr16:58408647-58469858	leanveh	dbveh	OK	7.36464	26.1126	1.82606	5e-05
Amhr2	chr15:102275797-102285070	leanveh	dbveh	OK	44.4164	0.913692	-5.60324	5e-05
Xrra1	chr7:107007727-107066334	leanveh	dbveh	OK	15.015	0.613911	-4.61223	5e-05
Adcy10	chr1:167415313-167506904	leanveh	dbveh	OK	5.58644	0.301482	-4.21179	5e-05
Cct6b	chr11:82532749-82577790	leanveh	dbveh	OK	6.82027	0.197905	-5.10695	5e-05
Srcin1	chr11:97370653-97436440	leanveh	dbveh	OK	1.97883	0.0975213	-4.34279	5e-05
Sdc1	chr12:8778201-8800493	leanveh	dbveh	OK	12.4192	77.8458	2.64804	5e-05
Rab8b	chr9:66691470-66767512	leanveh	dbveh	OK	9.98647	52.4668	2.39336	5e-05
Crisp2	chr17:40901682-40931095	leanveh	dbveh	OK	64.4166	0.965478	-6.06004	5e-05
2810408A11Rik	chr11:69710859-69714488	leanveh	dbveh	OK	7.92456	0.599515	-3.72446	5e-05
Ulk4	chr9:120873571-121186290	leanveh	dbveh	OK	4.08899	0.187062	-4.45016	5e-05
Colec12	chr18:9707645-9877993	leanveh	dbveh	OK	10.2159	55.0388	2.42964	5e-05
Slc37a2	chr9:37036733-37063323	leanveh	dbveh	OK	1.65812	46.005	4.79417	5e-05
Fam71f2	chr6:29231140-29240676	leanveh	dbveh	OK	24.7496	1.28794	-4.26427	5e-05
1700001K19Rik	chr12:111905898-111920829	leanveh	dbveh	OK	9.87302	0.422967	-4.54487	5e-05
Dyrk3	chr1:133025017-133034811	leanveh	dbveh	OK	14.0018	0.562556	-4.63748	5e-05
Tmc7	chr7:125679357-125728200	leanveh	dbveh	OK	3.42711	0.288499	-3.57035	5e-05
Mrc1	chr2:14151040-14253650	leanveh	dbveh	OK	16.4641	77.9396	2.24304	5e-05
Anpep	chr7:86966688-86987238	leanveh	dbveh	OK	8.96147	68.5155	2.93462	5e-05
Cd53	chr3:106561778-106593067	leanveh	dbveh	OK	5.58213	43.2334	2.95326	5e-05
Tekt2	chr4:125999364-126002443	leanveh	dbveh	OK	15.0785	1.08318	-3.79915	5e-05
Catsper3	chr13:55885939-55910359	leanveh	dbveh	OK	4.04638	0.292491	-3.79017	5e-05
Comp	chr8:72897446-72905965	leanveh	dbveh	OK	9.53239	0.398184	-4.58133	5e-05
Aldoart1	chr4:72511616-72513668	leanveh	dbveh	OK	4.82972	0.209872	-4.52436	5e-05
Efcab5	chr11:76903416-77002470	leanveh	dbveh	OK	4.58941	0.0732794	-5.96876	5e-05
S100a4	chr3:90407691-90409967	leanveh	dbveh	OK	53.8268	776.875	3.85129	5e-05
Itgam	chr7:135206153-135262005	leanveh	dbveh	OK	6.37578	76.6589	3.58778	5e-05
Hgsnat	chr8:27054930-27087216	leanveh	dbveh	OK	18.0562	68.4578	1.92272	5e-05
Metrnl	chr11:121563740-121578703	leanveh	dbveh	OK	8.09873	50.7006	2.64623	5e-05
1700010I14Rik	chr17:9181197-9201184	leanveh	dbveh	OK	31.9348	0.936694	-5.09141	5e-05
Ccdc158	chr5:93037320-93104153	leanveh	dbveh	OK	3.10932	0.114601	-4.7619	5e-05
Ropn1l	chr15:31370964-31383444	leanveh	dbveh	OK	69.0038	3.6323	-4.24772	5e-05
Gm70	chr12:77518585-77540478	leanveh	dbveh	OK	15.6441	0.337401	-5.53501	5e-05
Cd180	chr13:103483637-103496711	leanveh	dbveh	OK	1.78211	31.9582	4.16453	5e-05
Col5a1	chr2:27741944-27895030	leanveh	dbveh	OK	28.7334	133.059	2.21126	5e-05
Cyth4	chr15:78427476-78452449	leanveh	dbveh	OK	13.5184	95.8908	2.82647	5e-05
Fos	chr12:86814850-86818219	leanveh	dbveh	OK	8.57842	58.616	2.77251	5e-05
Msr1	chr8:40667053-40728032	leanveh	dbveh	OK	2.84767	41.746	3.87378	5e-05
Ankrd5	chr2:136358056-136381590	leanveh	dbveh	OK	20.2616	2.6305	-2.94534	5e-05
Ubxn11	chr4:133658513-133682693	leanveh	dbveh	OK	23.2868	0.757496	-4.94213	5e-05
Cage1	chr13:38097920-38128806	leanveh	dbveh	OK	11.7628	0.468199	-4.65096	5e-05
Agbl2	chr2:90622900-90656388	leanveh	dbveh	OK	4.88712	0.133929	-5.18944	5e-05
Ccdc30	chr4:118996443-119088126	leanveh	dbveh	OK	6.19633	0.19343	-5.00153	5e-05
Cotl1	chr8:122333113-122364479	leanveh	dbveh	OK	40.5664	204.355	2.33272	5e-05
Hpgds	chr6:65067286-65094724	leanveh	dbveh	OK	2.49082	22.9137	3.20152	5e-05
Siglec1	chr2:130894955-130912501	leanveh	dbveh	OK	2.37969	16.4259	2.78712	5e-05
Tnfrsf11a	chr1:107677299-107744558	leanveh	dbveh	OK	1.83566	16.3873	3.15821	5e-05
Spa17	chr9:37410878-37421305	leanveh	dbveh	OK	54.1355	3.03239	-4.15805	5e-05
Lass3	chr7:73888389-73968578	leanveh	dbveh	OK	5.05859	0.152193	-5.05476	5e-05
Rd3	chr1:193801253-193812163	leanveh	dbveh	OK	2.52378	0.112179	-4.49171	5e-05
Ttc25	chr11:100406945-100433880	leanveh	dbveh	OK	11.2449	0.566816	-4.31025	5e-05
Trem2	chr17:48485725-48491598	leanveh	dbveh	OK	11.7296	229.361	4.2894	5e-05
Gusb	chr5:130464890-130478698	leanveh	dbveh	OK	23.5286	136.568	2.53714	5e-05
Fcer1g	chr1:173159702-173164480	leanveh	dbveh	OK	41.1414	279.045	2.76184	5e-05
Dock2	chr11:34126863-34597325	leanveh	dbveh	OK	1.85932	10.7851	2.53619	5e-05
Ctsk	chr3:95303207-95313284	leanveh	dbveh	OK	19.951	429.185	4.42707	5e-05
Nup210l	chr3:89908053-90015939	leanveh	dbveh	OK	2.95592	0.0928951	-4.99186	5e-05
Psma8	chr18:14864659-14920808	leanveh	dbveh	OK	10.9042	0.619947	-4.1366	5e-05
Apobec1	chr6:122527809-122552462	leanveh	dbveh	OK	9.27524	76.018	3.03488	5e-05
Ptprc	chr1:139959437-140071882	leanveh	dbveh	OK	4.91785	18.5932	1.91868	5e-05
Atp6v0d2	chr4:19803984-19849713	leanveh	dbveh	OK	5.45473	113.861	4.38363	5e-05
Lpxn	chr19:12873098-12908298	leanveh	dbveh	OK	5.61529	56.6861	3.33556	5e-05
Morn5	chr2:35904992-35935229	leanveh	dbveh	OK	28.6416	1.05002	-4.76962	5e-05
Morn4	chr19:42149428-42160860	leanveh	dbveh	OK	10.8398	0.549192	-4.30288	5e-05
Cd84	chr1:173769827-173820849	leanveh	dbveh	OK	5.05755	60.4245	3.57862	5e-05
Sirpa	chr2:129418574-129457964	leanveh	dbveh	OK	26.5953	149.982	2.49555	5e-05
Plek	chr11:16871208-16908721	leanveh	dbveh	OK	4.0687	43.5073	3.41862	5e-05
2210404O07Rik	chr10:80855808-80857824	leanveh	dbveh	OK	106.873	5.38533	-4.31072	5e-05
Itgax	chr7:135273081-135294171	leanveh	dbveh	OK	4.42358	46.8387	3.40441	5e-05
Atf3	chr1:192994175-193007212	leanveh	dbveh	OK	4.50731	45.7887	3.34465	5e-05
Rnf17	chr14:57021533-57143868	leanveh	dbveh	OK	4.41561	0.346101	-3.67335	5e-05
Dnahc1	chr14:32073560-32137082	leanveh	dbveh	OK	1.41125	0.0468091	-4.91404	5e-05
Tyrobp	chr7:31198806-31202598	leanveh	dbveh	OK	90.0246	790.214	3.13385	5e-05
Mmp12	chr9:7347373-7360461	leanveh	dbveh	OK	14.4842	233.12	4.00852	5e-05
Lilrb4	chr10:51210780-51216417	leanveh	dbveh	OK	10.7588	169.037	3.97375	5e-05
Laptm5	chr4:130469248-130492063	leanveh	dbveh	OK	24.647	232.513	3.23783	5e-05
Sfpi1	chr2:90936953-90955913	leanveh	dbveh	OK	14.0059	144.325	3.36521	5e-05
Slc2a3	chr6:122677826-122692763	leanveh	dbveh	OK	37.5026	4.06908	-3.20422	5e-05
Krt8	chr15:101827141-101834773	leanveh	dbveh	OK	60.6627	2.58879	-4.55046	5e-05
Actg2	chr6:83462902-83486245	leanveh	dbveh	OK	19.958	1.10791	-4.17105	5e-05
Osbpl8	chr10:110601857-110734303	leanveh	dbveh	OK	12.4745	39.4275	1.66022	5e-05
Capg	chr6:72494432-72512974	leanveh	dbveh	OK	53.6565	353.213	2.71872	5e-05
Gsto2	chr19:47940034-47960795	leanveh	dbveh	OK	14.6729	0.910285	-4.01069	5e-05
1700025K23Rik	chr10:38838613-38853701	leanveh	dbveh	OK	62.4272	4.10047	-3.92832	5e-05
Ccdc40	chr11:119089885-119126526	leanveh	dbveh	OK	6.41199	0.101076	-5.98726	5e-05
Agt	chr8:127080486-127093607	leanveh	dbveh	OK	230.295	75.7905	-1.60339	5e-05
Arhgap25	chr6:87409378-87483229	leanveh	dbveh	OK	4.29945	35.4745	3.04456	5e-05
Tlr7	chrX:163742862-163768460	leanveh	dbveh	OK	2.33122	20.6442	3.14658	5e-05
Mmp14	chr14:55050440-55060095	leanveh	dbveh	OK	30.8217	99.0633	1.68441	5e-05
Sykb	chr13:52678805-52744161	leanveh	dbveh	OK	7.04104	43.0626	2.61257	5e-05
Cd68	chr11:69477872-69479564	leanveh	dbveh	OK	21.3515	402.771	4.23755	5e-05
Iqcd	chr5:121039031-121057122	leanveh	dbveh	OK	8.22132	0.426223	-4.26969	5e-05
Ggnbp1	chr17:27166203-27173323	leanveh	dbveh	OK	60.9239	2.36094	-4.68958	5e-05
Ms4a6c	chr19:11543857-11556686	leanveh	dbveh	OK	9.44939	58.3339	2.62604	5e-05
Col5a2	chr1:45431175-45560127	leanveh	dbveh	OK	18.5491	71.6113	1.94884	5e-05
Tlr13	chrX:103338613-103355832	leanveh	dbveh	OK	3.08526	50.8128	4.04173	5e-05
C5ar1	chr7:16832091-16844889	leanveh	dbveh	OK	6.77638	68.3636	3.33464	5e-05
Apobr	chr7:133728521-133732606	leanveh	dbveh	OK	4.25552	22.0473	2.3732	5e-05
Efhc1	chr1:20941706-20980922	leanveh	dbveh	OK	20.1922	1.21689	-4.05253	5e-05
Apbb1ip	chr2:22629846-22731173	leanveh	dbveh	OK	7.30339	62.6229	3.10005	5e-05
Tex14	chr11:87218566-87369325	leanveh	dbveh	OK	2.23399	0.132096	-4.07996	5e-05
Isg20	chr7:86058650-86065282	leanveh	dbveh	OK	133.59	20.4326	-2.70886	5e-05
C3ar1	chr6:122797157-122806175	leanveh	dbveh	OK	4.24701	67.9025	3.99894	5e-05
Npy	chr6:49772727-49779504	leanveh	dbveh	OK	705.997	39.1277	-4.1734	5e-05
6030429G01Rik	chr7:4474558-4484044	leanveh	dbveh	OK	6.72737	0.590665	-3.50963	5e-05
Pik3ap1	chr19:41348707-41459560	leanveh	dbveh	OK	3.54893	21.5052	2.59923	5e-05
Vav1	chr17:57418522-57468659	leanveh	dbveh	OK	2.23006	14.4744	2.69834	5e-05
Havcr2	chr11:46268432-46294756	leanveh	dbveh	OK	0.774066	9.31722	3.58937	5e-05
Ccdc96	chr5:36827236-36830820	leanveh	dbveh	OK	8.73442	0.379006	-4.52642	5e-05
Acrbp	chr6:124999944-125013283	leanveh	dbveh	OK	33.3589	2.94739	-3.50056	5e-05
Lilrb3	chr7:3664106-3671984	leanveh	dbveh	OK	5.52536	48.4346	3.1319	5e-05
Piwil2	chr14:70772286-70828901	leanveh	dbveh	OK	7.2958	0.357667	-4.35038	5e-05
Sh3bp2	chr5:34868432-34906288	leanveh	dbveh	OK	7.41527	31.1481	2.07057	5e-05
Irf5	chr6:29476732-29487319	leanveh	dbveh	OK	9.33551	62.3375	2.7393	5e-05
Wwp1	chr4:19536819-19636140	leanveh	dbveh	OK	12.096	46.5883	1.94543	5e-05
Dpep2	chr8:108508956-108520323	leanveh	dbveh	OK	1.98589	30.7051	3.95062	5e-05
BC021767	chr3:94464510-94471074	leanveh	dbveh	OK	2.06032	0.206929	-3.31567	5e-05
Mfap5	chr6:122463693-122479305	leanveh	dbveh	OK	27.7763	111.089	1.99979	5e-05
Fnip2	chr3:79149297-79371601	leanveh	dbveh	OK	4.57664	25.9383	2.50272	5e-05
Adssl1	chr12:113858257-113879566	leanveh	dbveh	OK	4.30397	57.0089	3.72745	5e-05
Oxtr	chr6:112423677-112439802	leanveh	dbveh	OK	16.4187	78.071	2.24945	5e-05
B3galt2	chr1:145454628-145549814	leanveh	dbveh	OK	54.4403	17.379	-1.64733	5e-05
Hcls1	chr16:36935068-36963300	leanveh	dbveh	OK	14.7767	62.5708	2.08217	5e-05
Itgb2	chr10:76993092-77028419	leanveh	dbveh	OK	14.6677	199.448	3.7653	5e-05
Pld3	chr7:28317036-28338131	leanveh	dbveh	OK	32.5382	171.035	2.39409	5e-05
Tubb6	chr18:67550384-67562403	leanveh	dbveh	OK	20.6947	87.0468	2.07253	5e-05
Folr2	chr7:108988501-109005708	leanveh	dbveh	OK	18.0632	100.271	2.47278	5e-05
Cilp	chr9:65112986-65128412	leanveh	dbveh	OK	5.36235	23.5058	2.13208	5e-05
Lca5l	chr16:96380012-96413864	leanveh	dbveh	OK	8.35379	0.556613	-3.90768	5e-05
9530077C05Rik	chr9:22216020-22249123	leanveh	dbveh	OK	5.72928	0.302122	-4.24515	5e-05
Plod1	chr4:147283861-147310885	leanveh	dbveh	OK	21.8215	68.673	1.65399	5e-05
Gm5617	chr9:48303449-48304077	leanveh	dbveh	OK	108.855	17.1905	-2.66272	5e-05
Mafb	chr2:160189412-160192801	leanveh	dbveh	OK	14.9991	86.789	2.53264	5e-05
Hrasls	chr16:29209780-29230616	leanveh	dbveh	OK	5.55855	0.449691	-3.6277	5e-05
Arhgap30	chr1:173319090-173340370	leanveh	dbveh	OK	4.84472	29.5049	2.60647	5e-05
Krt5	chr15:101537500-101543322	leanveh	dbveh	OK	5.17975	0	#NAME?	5e-05
Hmga1	chr17:27693518-27700617	leanveh	dbveh	OK	5.28323	32.9583	2.64115	5e-05
Sdc3	chr4:130348451-130382233	leanveh	dbveh	OK	24.5473	90.7654	1.88658	5e-05
Atp6v1a	chr16:44085516-44139132	leanveh	dbveh	OK	30.4847	99.7802	1.71067	5e-05
Oscp1	chr4:125735808-125766578	leanveh	dbveh	OK	20.0478	3.19173	-2.65103	5e-05
Tmem119	chr5:114243737-114250361	leanveh	dbveh	OK	7.23482	33.2112	2.19864	5e-05
Pstpip1	chr9:55937782-55976697	leanveh	dbveh	OK	5.22786	29.8076	2.51139	5e-05
Hk3	chr13:55050792-55122746	leanveh	dbveh	OK	2.09261	26.637	3.67005	5e-05
Alppl2	chr1:88983265-88986503	leanveh	dbveh	OK	3.45953	0	#NAME?	5e-05
Tm7sf4	chr15:39577477-39592480	leanveh	dbveh	OK	0.496875	5.7012	3.52031	5e-05
Bcam	chr7:20341486-20355881	leanveh	dbveh	OK	47.2028	14.2462	-1.7283	5e-05
Rassf2	chr2:131818585-131855724	leanveh	dbveh	OK	9.83945	32.1698	1.70906	5e-05
Cd200r1	chr16:44765848-44795090	leanveh	dbveh	OK	2.1253	28.9835	3.76949	5e-05
Krt18	chr15:101858646-101862457	leanveh	dbveh	OK	111.692	4.08372	-4.77349	5e-05
Pdk4	chr6:5433350-5446278	leanveh	dbveh	OK	15.3588	120.38	2.97046	5e-05
Dpysl4	chr7:146271899-146287690	leanveh	dbveh	OK	4.34254	0.277828	-3.96628	5e-05
Myo1f	chr17:33692651-33744709	leanveh	dbveh	OK	5.36821	34.8046	2.69677	5e-05
Ehd4	chr2:119915222-119980311	leanveh	dbveh	OK	28.7874	85.699	1.57384	5e-05
Sh3kbp1	chrX:156065339-156413849	leanveh	dbveh	OK	9.34086	30.4385	1.70427	5e-05
Ccdc74a	chr16:17646562-17650831	leanveh	dbveh	OK	11.2554	0.485183	-4.53594	5e-05
Pik3r5	chr11:68245626-68311348	leanveh	dbveh	OK	3.42282	31.068	3.18218	5e-05
Selplg	chr5:114267806-114280510	leanveh	dbveh	OK	5.86712	26.979	2.20111	5e-05
Lrrc48	chr11:60166881-60207835	leanveh	dbveh	OK	13.0228	0.471923	-4.78635	5e-05
Fbln2	chr6:91162757-91222534	leanveh	dbveh	OK	22.6479	124.335	2.45678	5e-05
Ccl9	chr11:83386418-83392138	leanveh	dbveh	OK	15.056	109.575	2.8635	5e-05
E030019B06Rik	chr7:146786849-146802228	leanveh	dbveh	OK	2.10162	0	#NAME?	5e-05
Spint2	chr7:30041348-30066996	leanveh	dbveh	OK	140.412	12.9457	-3.43912	5e-05
Inpp5d	chr1:89516886-89617083	leanveh	dbveh	OK	5.68708	27.8575	2.2923	5e-05
Cap2	chr13:46597271-46745650	leanveh	dbveh	OK	3.19407	0.235401	-3.7622	5e-05
S1pr2	chr9:20770395-20781237	leanveh	dbveh	OK	5.20659	21.4711	2.04398	5e-05
Sh3pxd2b	chr11:32247810-32328183	leanveh	dbveh	OK	4.86166	23.0377	2.24448	5e-05
Gp49a	chr10:51200484-51206025	leanveh	dbveh	OK	8.06691	133.735	4.05122	5e-05
Plekho2	chr9:65402190-65427841	leanveh	dbveh	OK	15.8226	79.7114	2.3328	5e-05
Fcgr3	chr1:172981299-172989534	leanveh	dbveh	OK	29.3888	205.281	2.80426	5e-05
Rac2	chr15:78389598-78403213	leanveh	dbveh	OK	4.66299	24.2132	2.37646	5e-05
Gas7	chr11:67346499-67502494	leanveh	dbveh	OK	10.6255	34.0078	1.67834	5e-05
Slc1a3	chr15:8584123-8660807	leanveh	dbveh	OK	42.9866	6.85318	-2.64904	5e-05
Tcam1	chr11:106137985-106149457	leanveh	dbveh	OK	6.85	0.336778	-4.34623	5e-05
Mmp2	chr8:95351226-95377319	leanveh	dbveh	OK	26.9037	97.5949	1.859	5e-05
Wfdc9	chr2:164475124-164480466	leanveh	dbveh	OK	25.4875	0	#NAME?	5e-05
Fam198b	chr3:79689851-79750200	leanveh	dbveh	OK	11.658	44.7393	1.94022	5e-05
Hmha1	chr10:79479416-79494216	leanveh	dbveh	OK	11.6693	36.7182	1.65378	5e-05
Cln8	chr8:14888535-14901719	leanveh	dbveh	OK	4.68868	19.1063	2.0268	5e-05
Car2	chr3:14886425-14900770	leanveh	dbveh	OK	46.3521	4.95032	-3.22704	5e-05
Daglb	chr5:144225360-144265310	leanveh	dbveh	OK	9.90693	45.4259	2.197	5e-05
Cybb	chrX:9012377-9046450	leanveh	dbveh	OK	6.7225	43.0228	2.67803	5e-05
Atp1a3	chr7:25763187-25790914	leanveh	dbveh	OK	1.99271	29.5334	3.88954	5e-05
Plau	chr14:21655883-21662610	leanveh	dbveh	OK	47.3987	172.718	1.8655	5e-05
Zfp185	chrX:70232677-70276882	leanveh	dbveh	OK	47.6509	2.75761	-4.11101	5e-05
Col6a1	chr10:76171536-76188789	leanveh	dbveh	OK	65.6318	295.529	2.17083	5e-05
Dnahc7b	chr1:46123582-46430395	leanveh	dbveh	OK	1.40856	0.0797386	-4.1428	5e-05
5031439G07Rik	chr15:84776149-84818401	leanveh	dbveh	OK	12.8146	40.7012	1.66729	5e-05
Col6a2	chr10:76058500-76086149	leanveh	dbveh	OK	67.975	318.842	2.22976	5e-05
5430435G22Rik	chr1:133585271-133610041	leanveh	dbveh	OK	7.19275	72.8495	3.3403	5e-05
Cyba	chr8:124948670-124956840	leanveh	dbveh	OK	52.0321	201.052	1.9501	5e-05
Ncf2	chr1:154655019-154684120	leanveh	dbveh	OK	6.46661	41.0228	2.66535	5e-05
Sash1	chr10:8442016-8605868	leanveh	dbveh	OK	16.2501	79.461	2.2898	5e-05
Ppil6	chr10:41210244-41234094	leanveh	dbveh	OK	12.7629	0.835812	-3.93264	5e-05
Plin2	chr4:86302468-86315963	leanveh	dbveh	OK	101.061	1019.36	3.33437	5e-05
Tubb2a	chr13:34166146-34169877	leanveh	dbveh	OK	17.5105	75.1918	2.10236	5e-05
Tnip3	chr6:65540391-65584034	leanveh	dbveh	OK	0.365073	6.02332	4.0443	5e-05
Slc34a2	chr5:53440591-53462902	leanveh	dbveh	OK	10.3776	0.223028	-5.5401	5e-05
Cyb561	chr11:105795017-105805461	leanveh	dbveh	OK	130.323	5.76964	-4.49747	5e-05
Cldn2	chrX:136335346-136345927	leanveh	dbveh	OK	28.8529	1.30727	-4.46408	5e-05
Coro1c	chr5:114292447-114358715	leanveh	dbveh	OK	25.3505	108.012	2.09111	5e-05
Cerk	chr15:85969530-86016571	leanveh	dbveh	OK	11.8277	36.089	1.60939	5e-05
Dlec1	chr9:119011595-119056812	leanveh	dbveh	OK	3.9178	0.179576	-4.44738	5e-05
Defb11	chr8:23015845-23016904	leanveh	dbveh	OK	159.73	0	#NAME?	5e-05
Csf1r	chr18:61265225-61290793	leanveh	dbveh	OK	29.6996	152.828	2.3634	5e-05
Plekho1	chr3:95792762-95799762	leanveh	dbveh	OK	25.586	82.8341	1.69487	5e-05
Cd44	chr2:102651299-102741822	leanveh	dbveh	OK	4.81251	36.6916	2.93059	5e-05
Dok3	chr13:55624595-55629899	leanveh	dbveh	OK	4.48333	27.0789	2.59453	5e-05
Gldc	chr19:30172936-30249908	leanveh	dbveh	OK	25.9945	2.77059	-3.22994	5e-05
C1qb	chr4:136436060-136442092	leanveh	dbveh	OK	106.757	584.174	2.45207	5e-05
Dnaja4	chr9:54547365-54564124	leanveh	dbveh	OK	71.4663	8.26944	-3.1114	5e-05
Corin	chr5:72691263-72895779	leanveh	dbveh	OK	2.69536	0.0452509	-5.89639	5e-05
Tmem106a	chr11:101443555-101453099	leanveh	dbveh	OK	22.0333	74.5733	1.75897	5e-05
Pnmt	chr11:98247945-98249411	leanveh	dbveh	OK	17.2529	0	#NAME?	5e-05
Dnase2a	chr8:87432522-87435360	leanveh	dbveh	OK	11.603	54.8374	2.24067	5e-05
Dmrt2	chr19:25746900-25753481	leanveh	dbveh	OK	16.27	58.4651	1.84536	5e-05
Gpr137b-ps	chr13:12706332-12742662	leanveh	dbveh	OK	5.41228	28.8668	2.4151	5e-05
Lrrc33	chr16:32142910-32165562	leanveh	dbveh	OK	9.47641	36.9508	1.96319	5e-05
Inha	chr1:75503651-75506929	leanveh	dbveh	OK	28.0335	1.42766	-4.29543	5e-05
Myo5a	chr9:74919012-75071494	leanveh	dbveh	OK	6.07625	29.4365	2.27635	5e-05
4930455F23Rik	chr1:166205728-166217978	leanveh	dbveh	OK	31.8991	6.92079	-2.20451	5e-05
Dnahc6	chr6:72967600-73171625	leanveh	dbveh	OK	1.76483	0.0559752	-4.9786	5e-05
Ctss	chr3:95330707-95360325	leanveh	dbveh	OK	77.751	861.663	3.47019	5e-05
Atp13a2	chr4:140542787-140563616	leanveh	dbveh	OK	19.3528	64.1067	1.72793	5e-05
Adamts2	chr11:50415586-50617551	leanveh	dbveh	OK	18.4533	75.1678	2.02624	5e-05
Lgmn	chr12:103632307-103677907	leanveh	dbveh	OK	65.099	550.922	3.08114	5e-05
Pla2g7	chr17:43705399-43749150	leanveh	dbveh	OK	22.3446	134.249	2.58691	5e-05
Tcirg1	chr19:3896049-3907133	leanveh	dbveh	OK	10.8787	69.0327	2.66577	5e-05
Mpeg1	chr19:12535268-12539775	leanveh	dbveh	OK	21.5373	246.895	3.51899	5e-05
Slfn2	chr11:82878613-82884180	leanveh	dbveh	OK	13.0725	68.9769	2.39958	5e-05
Gng2	chr14:20691780-20796471	leanveh	dbveh	OK	6.55336	24.9028	1.926	5e-05
Ncrna00086	chrX:53627762-53631647	leanveh	dbveh	OK	5.16369	0.240187	-4.42617	5e-05
Ccl2	chr11:81849078-81850954	leanveh	dbveh	OK	5.31659	94.9891	4.15919	5e-05
Cpne5	chr17:29293465-29374735	leanveh	dbveh	OK	11.5433	0.0713488	-7.33795	5e-05
Lipa	chr19:34566805-34601964	leanveh	dbveh	OK	32.1015	249.828	2.96022	5e-05
Cd300a	chr11:114751354-114765965	leanveh	dbveh	OK	2.86585	26.9654	3.23407	5e-05
Clec10a	chr11:69980124-69984338	leanveh	dbveh	OK	34.5663	359.449	3.37835	5e-05
Man1c1	chr4:134117604-134260205	leanveh	dbveh	OK	7.02992	24.6988	1.81286	5e-05
Gpr137b	chr13:13449887-13485891	leanveh	dbveh	OK	4.94307	25.1037	2.34442	5e-05
Slc5a7	chr17:54412914-54438359	leanveh	dbveh	OK	2.35105	55.8255	4.56954	5e-05
Ogdhl	chr14:33135204-33161006	leanveh	dbveh	OK	11.6167	0.737865	-3.9767	5e-05
Grn	chr11:102291635-102298123	leanveh	dbveh	OK	147.403	673.339	2.19156	5e-05
Ptafr	chr4:132119981-132136781	leanveh	dbveh	OK	4.1771	42.1318	3.33434	5e-05
Slc25a24	chr3:108926066-108971327	leanveh	dbveh	OK	9.38861	32.9632	1.81187	5e-05
Pid1	chr1:84032867-84281220	leanveh	dbveh	OK	22.795	77.7083	1.76935	5e-05
Wwc1	chr11:35652679-35793591	leanveh	dbveh	OK	14.8472	1.06215	-3.80513	5e-05
Kcnab2	chr4:151764852-151851588	leanveh	dbveh	OK	2.63422	18.4043	2.8046	5e-05
Fgf1	chr18:38998326-39130928	leanveh	dbveh	OK	15.5161	56.4638	1.86356	5e-05
Hdac11	chr6:91106808-91124677	leanveh	dbveh	OK	24.6728	3.25073	-2.92409	5e-05
Mfsd1	chr3:67386689-67408153	leanveh	dbveh	OK	31.9631	93.218	1.5442	5e-05
Plk2	chr13:111185251-111191051	leanveh	dbveh	OK	13.1653	45.5734	1.79145	5e-05
Srpx2	chrX:130442964-130466989	leanveh	dbveh	OK	6.68574	32.4579	2.27941	5e-05
Gja1	chr10:56097105-56110225	leanveh	dbveh	OK	109.955	23.6366	-2.21782	5e-05
Cdr2	chr7:128100549-128125826	leanveh	dbveh	OK	26.3753	102.067	1.95226	5e-05
Tgfbi	chr13:56710963-56740700	leanveh	dbveh	OK	26.3405	108.111	2.03716	5e-05
Col12a1	chr9:79446797-79566485	leanveh	dbveh	OK	0.93342	7.17782	2.94295	5e-05
2310046K01Rik	chr2:151822246-151834994	leanveh	dbveh	OK	38.2135	2.2854	-4.06356	5e-05
Tex19.2	chr11:120977528-120979991	leanveh	dbveh	OK	2.86465	0	#NAME?	5e-05
Mycl1	chr4:122673341-122679723	leanveh	dbveh	OK	11.8322	2.08043	-2.50777	5e-05
Col5a3	chr9:20574493-20619478	leanveh	dbveh	OK	19.9398	94.5576	2.24555	5e-05
Fabp5	chr3:10012605-10016610	leanveh	dbveh	OK	151.168	606.734	2.00491	5e-05
Elovl2	chr13:41277750-41315772	leanveh	dbveh	OK	15.5731	1.0254	-3.9248	5e-05
Cd24a	chr10:43298974-43304071	leanveh	dbveh	OK	61.7653	8.92415	-2.79101	5e-05
Fam167a	chr14:64055230-64084339	leanveh	dbveh	OK	3.59108	0.0724503	-5.63128	5e-05
Lmna	chr3:88285070-88307254	leanveh	dbveh	OK	41.694	150.702	1.85379	5e-05
Acta1	chr8:126415666-126418636	leanveh	dbveh	OK	7.62277	54.9151	2.84882	5e-05
Tesc	chr5:118477832-118511879	leanveh	dbveh	OK	17.0644	0.891519	-4.25858	5e-05
Cited4	chr4:120339167-120340425	leanveh	dbveh	OK	42.1104	0.633748	-6.05413	5e-05
Pf4	chr5:91201460-91202409	leanveh	dbveh	OK	54.5192	211.294	1.95442	5e-05
C1qc	chr4:136445716-136448829	leanveh	dbveh	OK	108.539	501.062	2.20677	5e-05
Atp2b4	chr1:135600841-135650098	leanveh	dbveh	OK	38.9215	11.9656	-1.70168	5e-05
Cdkn1a	chr17:29227930-29237667	leanveh	dbveh	OK	31.5129	215.767	2.77546	5e-05
Tmem104	chr11:115048800-115108339	leanveh	dbveh	OK	7.29693	26.8869	1.88154	5e-05
C1qa	chr4:136451830-136454759	leanveh	dbveh	OK	123.91	446.595	1.84968	5e-05
Erbb3	chr10:128006423-128026557	leanveh	dbveh	OK	7.11024	0.704017	-3.33622	5e-05
2022-09-09	chr11:117060974-117223639	leanveh	dbveh	OK	32.1853	106.036	1.72007	5e-05
Stom	chr2:35169509-35192529	leanveh	dbveh	OK	30.8723	109.937	1.8323	5e-05
Gstm7	chr3:107729251-107734663	leanveh	dbveh	OK	276.542	5.03786	-5.77855	5e-05
Pdzk1	chr3:96633748-96674849	leanveh	dbveh	OK	31.2043	4.14414	-2.9126	5e-05
Mrc2	chr11:105153959-105212459	leanveh	dbveh	OK	5.03743	73.5803	3.86856	5e-05
Lrp2	chr2:69262391-69424124	leanveh	dbveh	OK	8.36351	0.483989	-4.11106	5e-05
BC021891	chr8:128434349-128471339	leanveh	dbveh	OK	7.2182	0.233921	-4.94755	5e-05
Vat1	chr11:101320061-101327513	leanveh	dbveh	OK	71.1347	294.975	2.05197	5e-05
Wdr16	chr11:67738307-67779144	leanveh	dbveh	OK	6.98426	0.0516471	-7.07928	5e-05
4930471M23Rik	chr5:30950311-30962102	leanveh	dbveh	OK	12.3648	37.4502	1.59874	5e-05
Pygb	chr2:150612531-150657484	leanveh	dbveh	OK	116.376	42.9001	-1.43974	5e-05
Ttc9	chr12:82732355-82765928	leanveh	dbveh	OK	6.90599	0.739124	-3.22396	5e-05
1700007K13Rik	chr2:28317520-28321844	leanveh	dbveh	OK	12.2759	0.139592	-6.45847	5e-05
E230008N13Rik	chr4:45903174-45963646	leanveh	dbveh	OK	3.44295	0.276565	-3.63795	5e-05
Tnfrsf1b	chr4:144802270-144836773	leanveh	dbveh	OK	7.1135	29.8077	2.06706	5e-05
Espn	chr4:151494984-151526316	leanveh	dbveh	OK	28.5299	0.997419	-4.83813	5e-05
Slc1a1	chr19:28909655-28988450	leanveh	dbveh	OK	15.6182	2.40244	-2.70066	5e-05
Acsbg1	chr9:54452803-54509692	leanveh	dbveh	OK	51.6348	0.788624	-6.03286	5e-05
Gm347	chr2:28303460-28311028	leanveh	dbveh	OK	1.97039	0.168554	-3.54719	5e-05
Alox12	chr11:70054956-70068843	leanveh	dbveh	OK	12.3071	0.182206	-6.07778	5e-05
Myo7b	chr18:32118887-32196585	leanveh	dbveh	OK	1.83444	0.146871	-3.64272	5e-05
Deptor	chr15:54931471-55085757	leanveh	dbveh	OK	12.5473	46.772	1.89827	5e-05
P2rx7	chr5:123093919-123141441	leanveh	dbveh	OK	4.6483	23.9518	2.36536	5e-05
Pfn2	chr3:57645816-57651679	leanveh	dbveh	OK	30.4713	7.22362	-2.07666	5e-05
Wdr31	chr4:62114767-62131906	leanveh	dbveh	OK	5.88054	0.20513	-4.84134	5e-05
Il7r	chr15:9435913-9459631	leanveh	dbveh	OK	1.17763	17.4285	3.88749	5e-05
Fkbp4	chr6:128380124-128388649	leanveh	dbveh	OK	71.7088	21.6314	-1.72903	5e-05
Zfand2a	chr5:139947169-139960445	leanveh	dbveh	OK	11.9664	40.4515	1.7572	5e-05
Anxa1	chr19:20447923-20465161	leanveh	dbveh	OK	101.159	617.45	2.6097	5e-05
Atp6v1b2	chr8:71561606-71637616	leanveh	dbveh	OK	60.7791	225.478	1.89134	5e-05
Ncf1	chr5:134696129-134705495	leanveh	dbveh	OK	6.84008	29.1105	2.08946	5e-05
Foxred2	chr15:77770951-77787152	leanveh	dbveh	OK	25.6455	2.90291	-3.14313	5e-05
Emilin2	chr17:71601515-71660305	leanveh	dbveh	OK	9.97886	52.2936	2.38969	5e-05
Arl4c	chr1:90594800-90598766	leanveh	dbveh	OK	29.3942	5.94203	-2.3065	5e-05
Casq2	chr3:101890432-101950435	leanveh	dbveh	OK	4.637	0.344466	-3.75076	5e-05
Fam124a	chr14:63174573-63227322	leanveh	dbveh	OK	4.99233	21.7303	2.12192	5e-05
Sox9	chr11:112643523-112649071	leanveh	dbveh	OK	11.5279	0.471623	-4.61135	5e-05
Mogat1	chr1:78507634-78534748	leanveh	dbveh	OK	21.1153	1.17222	-4.17097	5e-05
Fads2	chr19:10138653-10175993	leanveh	dbveh	OK	58.5676	7.09562	-3.0451	5e-05
Ucp1	chr8:85814246-85822355	leanveh	dbveh	OK	0.261537	8.96797	5.09969	5e-05
Gabrr2	chr4:33150086-33182840	leanveh	dbveh	OK	0.86655	11.4781	3.72746	5e-05
Dgkg	chr16:22466641-22657304	leanveh	dbveh	OK	1.43113	0.0369335	-5.27608	5e-05
Gm11992	chr11:8916056-8969357	leanveh	dbveh	OK	5.08469	0.377173	-3.75286	5e-05
Cdh1	chr8:109127267-109194146	leanveh	dbveh	OK	25.9451	0.402389	-6.01073	5e-05
Dnahc10	chr5:125205454-125314678	leanveh	dbveh	OK	1.91713	0.0748549	-4.67871	5e-05
2410004P03Rik	chr12:17011763-17018533	leanveh	dbveh	OK	6.15532	0.324882	-4.24385	5e-05
Plaur	chr7:25247518-25260892	leanveh	dbveh	OK	7.05757	50.316	2.83377	5e-05
Slc8a2	chr7:16715648-16745860	leanveh	dbveh	OK	2.12426	0.0629315	-5.07703	5e-05
Tbx2	chr11:85646116-85655450	leanveh	dbveh	OK	22.361	4.17676	-2.42053	5e-05
Cdhr4	chr9:107897371-107902011	leanveh	dbveh	OK	12.1718	0.242301	-5.6506	5e-05
1700067K01Rik	chr8:86525604-86528669	leanveh	dbveh	OK	4.12951	0.294896	-3.80769	5e-05
B4galnt4	chr7:148247172-148258018	leanveh	dbveh	OK	1.91209	0.0550307	-5.11877	5e-05
Styxl1	chr5:136223089-136254255	leanveh	dbveh	OK	2.9338	0.227122	-3.69123	5e-05
Kdm4d	chr9:14267024-14304926	leanveh	dbveh	OK	4.66736	0.112762	-5.37125	5e-05
Alox5ap	chr5:150076633-150099623	leanveh	dbveh	OK	30.0638	165.05	2.4568	5e-05
Zmynd12	chr4:119095288-119126504	leanveh	dbveh	OK	3.61665	0.272623	-3.72967	5e-05
Lyz2	chr10:116714596-116719328	leanveh	dbveh	OK	301.524	1902.57	2.65761	5e-05
Lrrc23	chr6:124719880-124729736	leanveh	dbveh	OK	11.2389	0.224392	-5.64633	5e-05
Lef1	chr3:130813388-130926249	leanveh	dbveh	OK	3.01682	0.110258	-4.77407	5e-05
Ctsz	chr2:174241304-174264493	leanveh	dbveh	OK	95.8452	422.105	2.13883	5e-05
Prom1	chr5:44384860-44492975	leanveh	dbveh	OK	66.2569	1.31528	-5.65463	5e-05
Gpr81	chr5:124326744-124330029	leanveh	dbveh	OK	24.7476	5.17343	-2.25809	5e-05
C7	chr15:4938761-5013773	leanveh	dbveh	OK	35.7995	4.14334	-3.11107	5e-05
Ccdc103	chr11:102742557-102748045	leanveh	dbveh	OK	3.12848	0.190139	-4.04034	5e-05
Gramd2	chr9:59555570-59564231	leanveh	dbveh	OK	14.2265	0.135477	-6.71438	5e-05
4933433G15Rik	chr9:75257990-75263344	leanveh	dbveh	OK	3.77191	0.289624	-3.70304	5e-05
Fgf13	chrX:56315327-56387613	leanveh	dbveh	OK	5.26754	46.2791	3.13516	5e-05
Hapln4	chr8:72607427-72614761	leanveh	dbveh	OK	0.232078	4.25109	4.19515	5e-05
Nxnl2	chr13:51266393-51270556	leanveh	dbveh	OK	4.51574	0.150074	-4.91122	5e-05
Trpv2	chr11:62387987-62413807	leanveh	dbveh	OK	9.14393	32.2992	1.82061	5e-05
Gpr64	chrX:156828621-156936002	leanveh	dbveh	OK	45.152	4.31091	-3.38873	5e-05
Adam9	chr8:26060082-26127394	leanveh	dbveh	OK	25.5903	71.0352	1.47293	5e-05
Lama1	chr17:68046604-68171985	leanveh	dbveh	OK	2.64565	0.0759996	-5.12149	5e-05
Celsr1	chr15:85729187-85864207	leanveh	dbveh	OK	3.466	0.133023	-4.70353	5e-05
Slain1	chr14:104049459-104104016	leanveh	dbveh	OK	3.33054	0.131386	-4.66388	5e-05
Atp8b5	chr4:43280030-43386703	leanveh	dbveh	OK	1.78075	0.101448	-4.13367	5e-05
Gm9696	chr3:59756230-59777516	leanveh	dbveh	OK	0.587187	11.4491	4.28527	5e-05
Spef2	chr15:9592490-9678561	leanveh	dbveh	OK	1.42803	0.102864	-3.79522	5e-05
Tmed5	chr5:108550665-108561610	leanveh	dbveh	OK	27.9644	75.5097	1.43307	5e-05
Slc7a4	chr16:17572110-17576764	leanveh	dbveh	OK	33.9957	0.677639	-5.64869	5e-05
Nipal2	chr15:34502553-34608461	leanveh	dbveh	OK	1.89004	0.0954362	-4.30774	5e-05
Spint1	chr2:119063095-119075249	leanveh	dbveh	OK	11.382	0.593777	-4.26069	5e-05
AI646023	chr10:75012869-75023075	leanveh	dbveh	OK	6.85038	0.329275	-4.37882	5e-05
Adrb3	chr8:28336247-28340060	leanveh	dbveh	OK	195.031	5.48245	-5.15274	5e-05
Slc22a4	chr11:53796627-53841592	leanveh	dbveh	OK	6.40759	26.5129	2.04884	5e-05
Bmpr1b	chr3:141500099-141645215	leanveh	dbveh	OK	7.20254	0.0559033	-7.00943	5e-05
Irf6	chr1:194979305-194998229	leanveh	dbveh	OK	6.88528	0.346022	-4.31458	5e-05
Tmem150c	chr5:100506891-100588827	leanveh	dbveh	OK	12.7673	0.0872337	-7.19335	5e-05
Ehd3	chr17:74154180-74181433	leanveh	dbveh	OK	10.7701	65.5776	2.60617	5e-05
AI607873	chr1:175653558-175671940	leanveh	dbveh	OK	8.98126	37.2374	2.05176	5e-05
Fam13a	chr6:58883529-58974496	leanveh	dbveh	OK	57.0522	10.4481	-2.44904	5e-05
Fam55c	chr16:55840065-55895398	leanveh	dbveh	OK	8.20022	0.521747	-3.97424	5e-05
Ldhd	chr8:114150170-114154222	leanveh	dbveh	OK	41.7664	7.49049	-2.47921	5e-05
Hmox1	chr8:77617516-77624492	leanveh	dbveh	OK	34.5038	332.017	3.26643	5e-05
Pkp3	chr7:148264127-148276409	leanveh	dbveh	OK	3.96555	0.310181	-3.67634	5e-05
Il17rb	chr14:30809353-30822082	leanveh	dbveh	OK	6.28579	0.446387	-3.81573	5e-05
S100a6	chr3:90416815-90418336	leanveh	dbveh	OK	177.031	803.101	2.18158	5e-05
Dnaic2	chr11:114588725-114619200	leanveh	dbveh	OK	5.79445	0.351435	-4.04334	5e-05
Gata3	chr2:9778704-9800227	leanveh	dbveh	OK	4.46699	0.381111	-3.55102	5e-05
Maoa	chrX:16196823-16264938	leanveh	dbveh	OK	9.67043	28.0154	1.53457	5e-05
Cyth3	chr5:144383315-144471117	leanveh	dbveh	OK	20.4642	59.3157	1.53531	5e-05
Wnk2	chr13:49131670-49243383	leanveh	dbveh	OK	6.40998	0.0845968	-6.24357	5e-05
Sult2b1	chr7:52985352-53014925	leanveh	dbveh	OK	6.98028	0.325832	-4.42109	5e-05
Wnt4	chr4:136833549-136855416	leanveh	dbveh	OK	2.80567	0.317022	-3.14569	5e-05
Cdhr2	chr13:54802823-54838023	leanveh	dbveh	OK	5.79787	0.176019	-5.04172	5e-05
Igsf11	chr16:38902457-39027270	leanveh	dbveh	OK	12.015	0.930278	-3.69103	5e-05
Tead1	chr7:119822833-120050319	leanveh	dbveh	OK	10.4595	30.7711	1.55676	5e-05
Ptprf	chr4:117880817-117964002	leanveh	dbveh	OK	18.6763	4.30261	-2.11792	5e-05
Xist	chrX:100626855-100680296	leanveh	dbveh	OK	0.184101	9.22804	5.64746	5e-05
Folr1	chr7:109006844-109019197	leanveh	dbveh	OK	15.2734	1.06944	-3.8361	5e-05
Gpr137c	chr14:45839391-45900651	leanveh	dbveh	OK	1.65577	0.125968	-3.71638	5e-05
Rab25	chr3:88345950-88352201	leanveh	dbveh	OK	11.4955	0.163999	-6.13123	5e-05
Thbs1	chr2:117937657-117952869	leanveh	dbveh	OK	15.6151	95.2667	2.60903	5e-05
Clca2	chr3:144459522-144482458	leanveh	dbveh	OK	6.63062	0.153451	-5.43329	5e-05
Scnn1a	chr6:125271357-125294960	leanveh	dbveh	OK	16.7683	0.656019	-4.67586	5e-05
F13a1	chr13:36959046-37142113	leanveh	dbveh	OK	21.1797	76.8412	1.8592	5e-05
Tatdn2	chr6:113647492-113661062	leanveh	dbveh	OK	21.3671	77.2543	1.85423	5e-05
Vgll3	chr16:65815877-65863311	leanveh	dbveh	OK	4.79115	39.9056	3.05815	5e-05
Gipc2	chr3:151756804-151828864	leanveh	dbveh	OK	14.8495	0.962819	-3.94701	5e-05
Fabp3	chr4:129986021-129992707	leanveh	dbveh	OK	30.6742	2.30921	-3.73156	5e-05
Tmem38b	chr4:53838916-53874890	leanveh	dbveh	OK	12.677	40.5663	1.67807	5e-05
Cstb	chr10:77888414-77890367	leanveh	dbveh	OK	151.28	555.117	1.87557	5e-05
Smarca1	chrX:45162546-45245729	leanveh	dbveh	OK	6.06655	0.393882	-3.94504	5e-05
Rgs11	chr17:26339906-26348269	leanveh	dbveh	OK	8.04483	0.456165	-4.14043	5e-05
Marcksl1	chr4:129190824-129193225	leanveh	dbveh	OK	61.6328	10.8949	-2.50004	5e-05
Esr1	chr10:5342779-5734495	leanveh	dbveh	OK	15.7247	3.3708	-2.22187	5e-05
Dse	chr10:33871198-33927357	leanveh	dbveh	OK	8.79888	34.2532	1.96085	5e-05
Esyt3	chr9:99210385-99258949	leanveh	dbveh	OK	3.26844	0.30501	-3.42167	5e-05
Rbm11	chr16:75593135-75603070	leanveh	dbveh	OK	3.93847	0.120934	-5.02535	5e-05
Serpinf1	chr11:75223530-75236125	leanveh	dbveh	OK	57.6962	256.486	2.15233	5e-05
Gda	chr19:21465796-21547151	leanveh	dbveh	OK	16.8804	67.3255	1.9958	5e-05
Dock8	chr19:25074018-25276922	leanveh	dbveh	OK	4.59183	29.9942	2.70754	5e-05
Creg1	chr1:167693910-167705435	leanveh	dbveh	OK	41.3078	160.907	1.96174	5e-05
Nus1	chr10:52137352-52159998	leanveh	dbveh	OK	24.14	65.9891	1.4508	5e-05
Rgs9	chr11:109086668-109159495	leanveh	dbveh	OK	5.79688	0.0360745	-7.32815	5e-05
Ccr1	chr9:123876958-123883525	leanveh	dbveh	OK	2.93942	27.4965	3.22565	5e-05
Clec2l	chr6:38613068-38630864	leanveh	dbveh	OK	4.0403	0.285498	-3.82291	5e-05
Mdfic	chr6:15670660-15752169	leanveh	dbveh	OK	17.4577	76.0942	2.12393	5e-05
Arnt2	chr7:91394788-91558469	leanveh	dbveh	OK	7.19891	0.220036	-5.03197	5e-05
Slc6a17	chr3:107270465-107320936	leanveh	dbveh	OK	2.47388	0.146669	-4.07615	5e-05
Gltp	chr5:115119510-115140944	leanveh	dbveh	OK	62.3819	231.496	1.89178	5e-05
Dnase1l2	chr17:24577712-24580046	leanveh	dbveh	OK	11.115	0.789988	-3.81453	5e-05
Ap3b2	chr7:88605284-88638811	leanveh	dbveh	OK	4.73266	0.182291	-4.69834	5e-05
Susd4	chr1:184695036-184825785	leanveh	dbveh	OK	9.38289	0.687004	-3.77164	5e-05
Suox	chr10:128106942-128110974	leanveh	dbveh	OK	49.3283	10.0427	-2.29627	5e-05
Cd163	chr6:124254668-124280545	leanveh	dbveh	OK	13.8538	51.7541	1.90139	5e-05
Ch25h	chr19:34548273-34549625	leanveh	dbveh	OK	12.8742	1.16144	-3.47049	5e-05
Nek6	chr2:38367216-38443010	leanveh	dbveh	OK	13.4366	49.9603	1.89462	5e-05
Hdac6	chrX:7507247-7525015	leanveh	dbveh	OK	44.5322	4.07627	-3.44953	5e-05
Ramp1	chr1:93076398-93121773	leanveh	dbveh	OK	46.3157	2.51191	-4.20464	5e-05
Inadl	chr4:98062516-98386294	leanveh	dbveh	OK	6.89632	0.542303	-3.66866	5e-05
Myl9	chr2:156601199-156607393	leanveh	dbveh	OK	174.659	60.019	-1.54105	5e-05
Ccl6	chr11:83395562-83437195	leanveh	dbveh	OK	54.3455	321.268	2.56354	5e-05
Eps8l2	chr7:148524900-148551009	leanveh	dbveh	OK	20.1338	2.89809	-2.79645	5e-05
Cyp11a1	chr9:57862823-57874830	leanveh	dbveh	OK	28.9747	0.415887	-6.12246	5e-05
Abcg1	chr17:31194638-31254926	leanveh	dbveh	OK	3.88968	14.9825	1.94556	5e-05
Wfs1	chr5:37357342-37380221	leanveh	dbveh	OK	10.955	50.8635	2.21504	5e-05
Slc11a1	chr1:74421776-74432625	leanveh	dbveh	OK	9.95803	65.5517	2.7187	5e-05
Syp	chrX:7215705-7230382	leanveh	dbveh	OK	8.10118	38.3064	2.24138	5e-05
Hoxb9	chr11:96132643-96137907	leanveh	dbveh	OK	9.15248	0.715163	-3.67782	5e-05
Ninj1	chr13:49282915-49291620	leanveh	dbveh	OK	64.668	187.469	1.53553	5e-05
Mt2	chr8:96696517-96697467	leanveh	dbveh	OK	365.098	1445.2	1.98491	5e-05
Tnfaip2	chr12:112680871-112693229	leanveh	dbveh	OK	8.95395	34.8425	1.96025	5e-05
Fam129b	chr2:32731653-32816771	leanveh	dbveh	OK	32.9716	217.523	2.72187	5e-05
1700047G03Rik	chr15:11896816-11899838	leanveh	dbveh	OK	25.3593	132.586	2.38634	5e-05
Pam	chr1:99717670-99992209	leanveh	dbveh	OK	23.3926	88.1916	1.91459	5e-05
D630003M21Rik	chr2:158008268-158054958	leanveh	dbveh	OK	6.01315	0.395759	-3.92542	5e-05
Lox	chr18:52676891-52689362	leanveh	dbveh	OK	14.9436	196.787	3.71904	5e-05
Plxnb1	chr9:108997949-109022429	leanveh	dbveh	OK	8.58024	1.14065	-2.91116	5e-05
Synpo2	chr3:122779436-122939067	leanveh	dbveh	OK	13.9016	36.0576	1.37505	5e-05
Duoxa1	chr2:122129284-122139466	leanveh	dbveh	OK	0.767437	12.3934	4.01338	5e-05
2010300C02Rik	chr1:37668520-37776656	leanveh	dbveh	OK	6.82525	0.523194	-3.70546	5e-05
Smarcd3	chr5:24098439-24107820	leanveh	dbveh	OK	80.2064	7.09695	-3.49845	5e-05
Apoc2	chr7:20256927-20262213	leanveh	dbveh	OK	3.51665	31.8853	3.18062	5e-05
Myh11	chr16:14194619-14291501	leanveh	dbveh	OK	21.0494	5.20291	-2.01639	5e-05
Cryab	chr9:50560862-50564738	leanveh	dbveh	OK	102.638	343.647	1.74337	5e-05
Syne2	chr12:76919304-77211915	leanveh	dbveh	OK	15.0854	4.04097	-1.90038	5e-05
Hspb7	chr4:140976693-140981225	leanveh	dbveh	OK	12.0369	176.13	3.8711	5e-05
B4galnt2	chr11:95724872-95776185	leanveh	dbveh	OK	6.73819	0.198835	-5.08272	5e-05
Col4a4	chr1:82447297-82583424	leanveh	dbveh	OK	3.3905	0.242117	-3.80772	5e-05
Tmem30b	chr12:74644100-74647382	leanveh	dbveh	OK	15.5361	1.08883	-3.83478	5e-05
Akap2	chr4:57858119-57909856	leanveh	dbveh	OK	32.2152	110.549	1.77887	5e-05
Mmp19	chr10:128227965-128241426	leanveh	dbveh	OK	14.9914	84.4132	2.49333	5e-05
Mtap7d2	chrX:155852509-155936879	leanveh	dbveh	OK	3.5152	0.371438	-3.24241	5e-05
Fam49a	chr12:12268944-12383167	leanveh	dbveh	OK	6.38306	25.9498	2.0234	5e-05
Thbs2	chr17:14802506-14831269	leanveh	dbveh	OK	14.2871	73.5065	2.36316	5e-05
Mcoln3	chr3:145784754-145803610	leanveh	dbveh	OK	5.74066	0.22571	-4.66867	5e-05
Defb38	chr8:19023463-19026529	leanveh	dbveh	OK	610.756	0	#NAME?	5e-05
Defb39	chr8:19052825-19064810	leanveh	dbveh	OK	329.231	0	#NAME?	5e-05
BC048679	chr7:88639159-88643216	leanveh	dbveh	OK	283.224	0	#NAME?	5e-05
Defb40	chr8:18974939-18978116	leanveh	dbveh	OK	247.885	0	#NAME?	5e-05
Gm17252	chr9:35492663-35494956	leanveh	dbveh	OK	111.029	0	#NAME?	5e-05
9230107M04Rik	chr7:14140214-14156416	leanveh	dbveh	OK	85.8758	0	#NAME?	5e-05
Defb26	chr2:152333491-152337472	leanveh	dbveh	OK	78.9345	0	#NAME?	5e-05
Abcb5	chr12:120106296-120204894	leanveh	dbveh	OK	29.4239	0	#NAME?	5e-05
Crisp4	chr1:18105271-18127132	leanveh	dbveh	OK	18.4141	0	#NAME?	5e-05
Gm6040	chr8_random:287283-292865	leanveh	dbveh	OK	16.7707	0	#NAME?	5e-05
Spint4	chr2:164524000-164527948	leanveh	dbveh	OK	16.4895	0	#NAME?	5e-05
Spinkl	chr18:44326011-44334727	leanveh	dbveh	OK	13.4023	0	#NAME?	5e-05
Gm10823	chr16:27850015-27926214	leanveh	dbveh	OK	10.4621	0	#NAME?	5e-05
Zfp648	chr1:156048316-156052804	leanveh	dbveh	OK	2.84264	0	#NAME?	5e-05
Serpina3k	chr12:105576695-105583949	leanveh	dbveh	OK	12.2534	91.4166	2.89927	0.0001
Fgb	chr3:82846226-82853712	leanveh	dbveh	OK	4.07613	46.0123	3.49675	0.0001
Slc36a2	chr11:54971969-54998579	leanveh	dbveh	OK	6.30564	22.6834	1.84692	0.0001
Clec12a	chr6:129300261-129315321	leanveh	dbveh	OK	4.66344	33.0755	2.8263	0.0001
Lrrc9	chr12:73542852-73611552	leanveh	dbveh	OK	7.31996	0.222507	-5.03992	0.0001
Cd14	chr18:36884720-36886308	leanveh	dbveh	OK	11.6727	51.0476	2.1287	0.0001
Pfn4	chr12:4776100-4785072	leanveh	dbveh	OK	10.1585	0.369031	-4.7828	0.0001
Tmem132b	chr5:126012787-126272953	leanveh	dbveh	OK	4.22551	0.32236	-3.71238	0.0001
Tns3	chr11:8331654-8564538	leanveh	dbveh	OK	9.66898	26.2768	1.44236	0.0001
Brdt	chr5:107760212-107816077	leanveh	dbveh	OK	12.1889	1.23553	-3.30236	0.0001
Gm711	chr2:26789588-26809016	leanveh	dbveh	OK	4.6873	0.272267	-4.10566	0.0001
Pacrg	chr17:10595877-11033057	leanveh	dbveh	OK	18.8249	1.60382	-3.55305	0.0001
Blnk	chr19:41003416-41069025	leanveh	dbveh	OK	4.04054	21.0589	2.38181	0.0001
Pld6	chr11:59597394-59601159	leanveh	dbveh	OK	4.24485	0.346457	-3.61497	0.0001
Cchcr1	chr17:35654060-35667960	leanveh	dbveh	OK	19.0988	3.41303	-2.48435	0.0001
Sema5b	chr16:35541447-35664344	leanveh	dbveh	OK	4.0956	0.363449	-3.49425	0.0001
Pla2g15	chr8:108674298-108688615	leanveh	dbveh	OK	17.1701	49.4005	1.52462	0.0001
Ncf4	chr15:78075240-78093010	leanveh	dbveh	OK	7.02216	37.9887	2.43558	0.0001
Galc	chr12:99440509-99497547	leanveh	dbveh	OK	8.20818	24.9145	1.60185	0.0001
Asah1	chr8:42425996-42460051	leanveh	dbveh	OK	41.8998	107.156	1.3547	0.0001
Loxl1	chr9:58135529-58161019	leanveh	dbveh	OK	22.431	61.7689	1.46139	0.0001
Plekhb2	chr1:34906803-34936430	leanveh	dbveh	OK	17.4231	43.7703	1.32895	0.0001
Irf8	chr8:123260275-123280592	leanveh	dbveh	OK	8.38776	32.0813	1.93538	0.0001
Spon1	chr7:120909511-121186889	leanveh	dbveh	OK	19.3734	4.82762	-2.00469	0.0001
Cd93	chr2:148262386-148269271	leanveh	dbveh	OK	20.4941	55.5231	1.43788	0.0001
Myo1g	chr11:6406550-6420961	leanveh	dbveh	OK	2.47037	14.4798	2.55125	0.0001
Cd9	chr6:125410283-125444773	leanveh	dbveh	OK	39.6227	104.459	1.39853	0.0001
Ces1d	chr8:95689970-95721703	leanveh	dbveh	OK	358.742	87.0027	-2.04381	0.0001
Rap1b	chr10:117251652-117283030	leanveh	dbveh	OK	69.5184	184.013	1.40434	0.0001
Pkdrej	chr15:85645105-85652163	leanveh	dbveh	OK	1.52957	0.135633	-3.49535	0.0001
Unc93b1	chr19:3935185-3949340	leanveh	dbveh	OK	42.6818	128.589	1.59107	0.0001
Wdr95	chr5:150331253-150414469	leanveh	dbveh	OK	1.56976	0.098477	-3.99461	0.0001
Ap1s2	chrX:160347091-160367478	leanveh	dbveh	OK	21.7674	6.84502	-1.66904	0.0001
Mum1l1	chrX:135744582-135772874	leanveh	dbveh	OK	28.6899	0.658191	-5.44589	0.0001
Ces1f	chr8:95780134-95803635	leanveh	dbveh	OK	31.1558	8.80116	-1.82373	0.0001
Galntl4	chr7:118615174-118923491	leanveh	dbveh	OK	18.9216	5.03242	-1.91071	0.0001
Dpep1	chr8:125710134-125725713	leanveh	dbveh	OK	46.7293	138.291	1.56531	0.0001
Wdr54	chr6:83102703-83106373	leanveh	dbveh	OK	2.73148	0.241872	-3.49736	0.0001
Klk1	chr7:51480806-51484987	leanveh	dbveh	OK	39.8926	4.56177	-3.12846	0.0001
Gab2	chr7:104230260-104457461	leanveh	dbveh	OK	11.0112	35.4429	1.68652	0.0001
Grb7	chr11:98308147-98316687	leanveh	dbveh	OK	17.1328	1.61282	-3.4091	0.0001
Cds1	chr5:102194148-102252871	leanveh	dbveh	OK	31.8123	7.39034	-2.10587	0.0001
Scarb2	chr5:92872898-92934634	leanveh	dbveh	OK	31.1711	81.573	1.38788	0.0001
Nrbp2	chr15:75916023-75920443	leanveh	dbveh	OK	57.806	15.4427	-1.9043	0.0001
Nt5e	chr9:88222446-88266927	leanveh	dbveh	OK	19.5562	1.09452	-4.15926	0.0001
Alad	chr4:62170203-62181097	leanveh	dbveh	OK	55.1059	13.32	-2.04861	0.0001
Tsc22d2	chr3:58219610-58270709	leanveh	dbveh	OK	5.27219	16.1341	1.61364	0.0001
Fndc7	chr3:108656595-108692926	leanveh	dbveh	OK	6.0109	0.230682	-4.7036	0.0001
Rap1gap	chr4:137237617-137285782	leanveh	dbveh	OK	6.77502	0.720899	-3.23236	0.0001
Cela1	chr15:100504852-100518351	leanveh	dbveh	OK	8.60747	44.685	2.37613	0.0001
Egf	chr3:129380492-129466800	leanveh	dbveh	OK	7.27898	0.694499	-3.38969	0.0001
Myo6	chr9:80012840-80159536	leanveh	dbveh	OK	28.3548	7.57583	-1.90412	0.0001
Mcoln2	chr3:145812796-145858476	leanveh	dbveh	OK	0.523476	4.4055	3.07311	0.0001
C2	chr17:34999546-35019045	leanveh	dbveh	OK	39.7016	9.2162	-2.10695	0.0001
Chrna2	chr14:66759796-66771785	leanveh	dbveh	OK	13.2733	2.04297	-2.69978	0.0001
Ezr	chr17:6942479-6987129	leanveh	dbveh	OK	44.2348	11.9197	-1.89183	0.0001
Fbxl5	chr5:44135856-44173388	leanveh	dbveh	OK	32.7298	93.7538	1.51827	0.0001
Col4a3	chr1:82583495-82718634	leanveh	dbveh	OK	3.00496	0.29382	-3.35434	0.0001
Dmpk	chr7:19669197-19679169	leanveh	dbveh	OK	51.1506	142.886	1.48204	0.0001
Lcn2	chr2:32240156-32243259	leanveh	dbveh	OK	216.71	71.6066	-1.5976	0.00015
Chst1	chr2:92439863-92455409	leanveh	dbveh	OK	119.858	40.1778	-1.57685	0.00015
Pigr	chr1:132723260-132748826	leanveh	dbveh	OK	1.31181	12.0704	3.20184	0.00015
Apob	chr12:7984482-8023645	leanveh	dbveh	OK	0.418249	9.67838	4.53233	0.00015
Hspa2	chr12:77505162-77507923	leanveh	dbveh	OK	72.2209	6.41289	-3.49337	0.00015
Ybx2	chr11:69749400-69755101	leanveh	dbveh	OK	125.142	6.30065	-4.31192	0.00015
Alcam	chr16:52249108-52453110	leanveh	dbveh	OK	8.14069	22.1858	1.44642	0.00015
Prrx1	chr1:165175249-165243781	leanveh	dbveh	OK	6.70704	30.5702	2.18838	0.00015
Gas2l3	chr10:88871567-88906712	leanveh	dbveh	OK	0.928368	6.60459	2.8307	0.00015
Clec4a2	chr6:123072707-123094017	leanveh	dbveh	OK	3.59906	28.0101	2.96025	0.00015
1810011O10Rik	chr8:25548087-25549418	leanveh	dbveh	OK	103.981	32.4695	-1.67916	0.00015
Efhd2	chr4:141414056-141430835	leanveh	dbveh	OK	38.3344	108.03	1.49472	0.00015
Pgp	chr17:24607417-24608541	leanveh	dbveh	OK	128.713	37.8032	-1.76758	0.00015
Lgals12	chr19:7671150-7681666	leanveh	dbveh	OK	96.9913	35.0422	-1.46876	0.00015
Mapk8ip2	chr15:89284341-89292878	leanveh	dbveh	OK	3.47318	0.189542	-4.19567	0.00015
Tbxas1	chr6:38868984-39034578	leanveh	dbveh	OK	4.43882	31.632	2.83313	0.00015
Fxyd5	chr7:31817741-31827341	leanveh	dbveh	OK	23.1289	89.8231	1.95739	0.00015
Wdr91	chr6:34830425-34860831	leanveh	dbveh	OK	7.9467	27.7973	1.80652	0.00015
Gstm2	chr3:107784619-107789354	leanveh	dbveh	OK	266.031	86.2857	-1.6244	0.00015
Prkcb	chr7:129432638-129777915	leanveh	dbveh	OK	1.53594	6.58192	2.09939	0.00015
Chst11	chr10:82448241-82658636	leanveh	dbveh	OK	5.42692	16.7182	1.62321	0.00015
A930038C07Rik	chr6:65621604-65656924	leanveh	dbveh	OK	0.306914	2.96902	3.27408	0.00015
Iqgap1	chr7:87856468-87948217	leanveh	dbveh	OK	22.4666	67.4493	1.58602	0.00015
Gm885	chr11:106612581-106628882	leanveh	dbveh	OK	1.55227	14.7476	3.24802	0.00015
Scel	chr14:103912557-104012563	leanveh	dbveh	OK	10.3369	0.785342	-3.71834	0.00015
Lgals3	chr14:47993534-48005842	leanveh	dbveh	OK	114.593	1376.83	3.58677	0.00015
Pip5k1c	chr10:80755716-80782719	leanveh	dbveh	OK	20.9947	58.2743	1.47283	0.00015
Gpr176	chr2:118102833-118199155	leanveh	dbveh	OK	0.454436	3.8922	3.09844	0.00015
Cd48	chr1:173612185-173635388	leanveh	dbveh	OK	7.55998	36.9756	2.29012	0.00015
Tgfb1	chr7:26472020-26490015	leanveh	dbveh	OK	31.9484	84.1669	1.39751	0.00015
Cyp2b10	chr7:26682682-26711643	leanveh	dbveh	OK	0.29678	3.16651	3.41543	0.00015
Nrgn	chr9:37352077-37360330	leanveh	dbveh	OK	38.5683	2.52305	-3.93418	0.00015
Pi4k2a	chr19:42164924-42196708	leanveh	dbveh	OK	17.0331	43.7593	1.36125	0.00015
Hunk	chr16:90386641-90499798	leanveh	dbveh	OK	5.16356	0.492716	-3.38954	0.00015
Enah	chr1:183834575-183950111	leanveh	dbveh	OK	15.257	2.65174	-2.52446	0.00015
6330406I15Rik	chr5:150214380-150234278	leanveh	dbveh	OK	14.611	46.7365	1.6775	0.00015
Cpa2	chr6:30491641-30514473	leanveh	dbveh	OK	1.05111	9.74393	3.21259	0.00015
Tst	chr15:78229985-78236289	leanveh	dbveh	OK	75.2302	19.0178	-1.98396	0.00015
Itga7	chr10:128370868-128398044	leanveh	dbveh	OK	38.3483	124.828	1.7027	0.00015
Gm4952	chr19:12674473-12702106	leanveh	dbveh	OK	0.27502	2.76273	3.32849	0.00015
Rassf3	chr10:120847406-120913306	leanveh	dbveh	OK	17.3648	51.1311	1.55803	0.00015
Rasd2	chr8:77737842-77748012	leanveh	dbveh	OK	8.51264	0.892123	-3.25429	0.00015
Cad	chr5:31357183-31380852	leanveh	dbveh	OK	29.3662	4.94513	-2.57008	0.00015
Eif1a	chr18:46757357-46769879	leanveh	dbveh	OK	30.7245	77.3102	1.33127	0.00015
G6pdx	chrX:71638629-71699117	leanveh	dbveh	OK	56.8657	191.814	1.75408	0.00015
Kirrel	chr3:86882513-86978669	leanveh	dbveh	OK	13.3548	39.1794	1.55273	0.00015
Esd	chr14:75132151-75150250	leanveh	dbveh	OK	68.2615	168.369	1.30248	0.00015
Lyve1	chr7:117994120-118006467	leanveh	dbveh	OK	10.086	30.9765	1.61882	0.00015
Veph1	chr3:65858747-66100741	leanveh	dbveh	OK	1.85671	0.0256807	-6.17592	0.00015
Kcnk5	chr14:20959279-21001004	leanveh	dbveh	OK	6.2241	0.809189	-2.94332	0.00015
Serpina1d	chr12:105001796-105011843	leanveh	dbveh	OK	4.75381	46.7531	3.29791	0.0002
Cyp3a11	chr5:146666182-146691430	leanveh	dbveh	OK	3.63337	39.3834	3.43821	0.0002
Sel1l3	chr5:53498321-53604691	leanveh	dbveh	OK	2.30546	13.5704	2.55734	0.0002
Cd300lb	chr11:114784094-114795700	leanveh	dbveh	OK	2.49193	36.5271	3.87363	0.0002
Cd109	chr9:78463352-78564067	leanveh	dbveh	OK	2.2903	8.59913	1.90866	0.0002
Usp2	chr9:43875103-43903710	leanveh	dbveh	OK	29.2388	5.48964	-2.4131	0.0002
Prr22	chr17:56909698-56911557	leanveh	dbveh	OK	8.51796	0.44057	-4.27307	0.0002
Osbp2	chr11:3603733-3763906	leanveh	dbveh	OK	13.4822	0.960379	-3.81131	0.0002
Asrgl1	chr19:9186208-9210056	leanveh	dbveh	OK	41.6954	9.58043	-2.12173	0.0002
Lat2	chr5:135076134-135090893	leanveh	dbveh	OK	4.92193	49.6899	3.33566	0.0002
Spata24	chr18:35816342-35821840	leanveh	dbveh	OK	45.9409	6.71343	-2.77466	0.0002
Itga5	chr15:103174717-103197179	leanveh	dbveh	OK	8.136	23.7687	1.54667	0.0002
Arhgdib	chr6:136872229-136890238	leanveh	dbveh	OK	28.6976	108.976	1.925	0.0002
Trfr2	chr5:138011078-138028709	leanveh	dbveh	OK	1.02998	10.497	3.34929	0.0002
F630110N24Rik	chr10:80820314-80828565	leanveh	dbveh	OK	11.0033	53.5966	2.28421	0.0002
C530028O21Rik	chr6:124946737-124953117	leanveh	dbveh	OK	19.3303	57.4498	1.57144	0.0002
Pcyt1a	chr16:32431006-32475151	leanveh	dbveh	OK	20.6909	53.3181	1.36563	0.0002
Gyk	chrX:82947275-83022158	leanveh	dbveh	OK	21.807	4.93511	-2.14364	0.0002
Rsph9	chr17:46266225-46281147	leanveh	dbveh	OK	12.4645	1.4745	-3.07953	0.0002
Chrm3	chr13:9875858-10360049	leanveh	dbveh	OK	1.88656	0.154098	-3.61384	0.0002
Per3	chr4:150377763-150418731	leanveh	dbveh	OK	18.5935	6.28038	-1.56587	0.0002
Sox7	chr14:64562542-64569569	leanveh	dbveh	OK	21.0752	5.29109	-1.99391	0.0002
Kcnj16	chr11:110829346-110889281	leanveh	dbveh	OK	8.68323	0.750917	-3.53151	0.0002
Penk	chr4:4060682-4065592	leanveh	dbveh	OK	90.5626	25.5119	-1.82775	0.0002
Ccnjl	chr11:43342285-43400499	leanveh	dbveh	OK	1.65615	0.141859	-3.5453	0.0002
Gm88	chr17:46391113-46394265	leanveh	dbveh	OK	6.94998	0.487855	-3.83248	0.0002
Hsf2bp	chr17:32081713-32171453	leanveh	dbveh	OK	1.39354	0.148489	-3.23033	0.0002
Sag	chr1:89700254-89741732	leanveh	dbveh	OK	3.57443	0.312919	-3.51385	0.0002
Cpxm2	chr7:139234492-139346424	leanveh	dbveh	OK	5.56108	0.731018	-2.92739	0.0002
Tcf7	chr11:52066105-52095752	leanveh	dbveh	OK	4.86495	0.59026	-3.043	0.0002
Atp1b1	chr1:166237805-166388486	leanveh	dbveh	OK	92.5254	6.60214	-3.80884	0.0002
Lipg	chr18:75098975-75120917	leanveh	dbveh	OK	17.7184	1.10685	-4.00072	0.0002
Lrrc59	chr11:94491137-94515068	leanveh	dbveh	OK	58.7671	143.519	1.28816	0.0002
Cfp	chrX:20502660-20508650	leanveh	dbveh	OK	15.0766	47.7405	1.6629	0.0002
Ccl11	chr11:81871333-81876457	leanveh	dbveh	OK	27.2551	88.5194	1.69947	0.0002
Atp6v0a1	chr11:100870765-100925031	leanveh	dbveh	OK	46.3319	144.048	1.63648	0.0002
Slc24a6	chr5:120961200-120984033	leanveh	dbveh	OK	18.5289	53.0617	1.51789	0.0002
1110059M19Rik	chrX:42444080-42445967	leanveh	dbveh	OK	9.36899	53.9924	2.52679	0.0002
Zmiz1	chr14:26278670-26486233	leanveh	dbveh	OK	16.6542	40.5185	1.2827	0.0002
Gnmt	chr17:46862612-46866114	leanveh	dbveh	OK	5.53185	67.593	3.61104	0.00025
Mki67	chr7:142881470-142908062	leanveh	dbveh	OK	2.73656	10.0725	1.87998	0.00025
Clip4	chr17:72119030-72207691	leanveh	dbveh	OK	16.4894	0.857551	-4.26517	0.00025
Spag4	chr2:155890948-155895235	leanveh	dbveh	OK	11.232	1.13737	-3.30385	0.00025
Cyp1b1	chr17:80106292-80114381	leanveh	dbveh	OK	13.5415	35.5167	1.39111	0.00025
Spatc1	chr15:76098518-76123002	leanveh	dbveh	OK	6.75825	0.423545	-3.99606	0.00025
Aqp9	chr9:70958467-71011096	leanveh	dbveh	OK	22.5582	5.26649	-2.09874	0.00025
B4galt6	chr18:20843099-20904905	leanveh	dbveh	OK	4.14704	14.779	1.83339	0.00025
Snx8	chr5:140816256-140865201	leanveh	dbveh	OK	11.2929	30.8713	1.45085	0.00025
Spred1	chr2:116947185-117005072	leanveh	dbveh	OK	10.4681	30.3988	1.53802	0.00025
Mtl5	chr19:3388868-3407785	leanveh	dbveh	OK	17.729	1.57297	-3.49454	0.00025
Cetn4	chr3:37207548-37211368	leanveh	dbveh	OK	20.1261	1.93688	-3.37726	0.00025
4930432K21Rik	chr8:86671936-86696496	leanveh	dbveh	OK	5.4801	0.246885	-4.47229	0.00025
Parvb	chr15:84062472-84146039	leanveh	dbveh	OK	11.4004	34.0118	1.57695	0.00025
Mmgt1	chrX:53838688-53851096	leanveh	dbveh	OK	15.8421	40.7359	1.36253	0.00025
Cpt1a	chr19:3323300-3385733	leanveh	dbveh	OK	33.3148	82.4781	1.30785	0.00025
Rnh1	chr7:148346224-148358750	leanveh	dbveh	OK	44.5579	115.594	1.37531	0.00025
Trpm3	chr19:22213606-23064374	leanveh	dbveh	OK	3.43684	0.397178	-3.11322	0.00025
Fam65c	chr2:167806285-167836093	leanveh	dbveh	OK	0.416466	3.51518	3.07733	0.00025
Kcnj14	chr7:53071836-53080117	leanveh	dbveh	OK	0.310149	2.75755	3.15235	0.00025
Art5	chr7:109245392-109248743	leanveh	dbveh	OK	4.0852	0.397301	-3.3621	0.00025
P2rx4	chr5:123157565-123179051	leanveh	dbveh	OK	26.5913	75.3835	1.50329	0.00025
Pgd	chr4:148524093-148540816	leanveh	dbveh	OK	102.047	281.359	1.46318	0.00025
Gspt2	chrX:91881407-91883900	leanveh	dbveh	OK	11.9257	2.55692	-2.2216	0.00025
Gstm6	chr3:107741765-107746667	leanveh	dbveh	OK	74.0303	5.19048	-3.83418	0.00025
Fcgr2b	chr1:172890688-172906202	leanveh	dbveh	OK	22.6849	72.5491	1.67723	0.00025
Aipl1	chr11:71842223-71851011	leanveh	dbveh	OK	0.0993424	1.10966	3.48156	0.00025
Fbxo10	chr4:45047119-45097476	leanveh	dbveh	OK	15.1167	3.46575	-2.1249	0.00025
Igf2r	chr17:12875271-13061009	leanveh	dbveh	OK	10.8451	27.6595	1.35073	0.0003
Gcnt2	chr13:40955500-41056261	leanveh	dbveh	OK	12.4096	34.8377	1.48919	0.0003
Ccdc87	chr19:4839365-4842528	leanveh	dbveh	OK	2.97034	0.186553	-3.99298	0.0003
Abcb4	chr5:8893720-8959226	leanveh	dbveh	OK	0.839907	9.09824	3.43729	0.0003
Ubd	chr17:37330836-37333046	leanveh	dbveh	OK	6.89881	119.394	4.11324	0.0003
Man2a1	chr17:64950988-65104450	leanveh	dbveh	OK	24.4544	64.1951	1.39237	0.0003
Lrrc18	chr14:33772732-33998252	leanveh	dbveh	OK	26.7614	0.415167	-6.01031	0.0003
Clmn	chr12:106001323-106103286	leanveh	dbveh	OK	10.5892	3.50647	-1.59451	0.0003
Vwa3a	chr7:127883070-127949054	leanveh	dbveh	OK	6.41826	1.48783	-2.10898	0.0003
Rfx2	chr17:56915319-56970431	leanveh	dbveh	OK	12.4112	2.54658	-2.28501	0.0003
Dpep3	chr8:108497419-108503319	leanveh	dbveh	OK	13.012	1.44078	-3.17492	0.0003
Ncan	chr8:72616983-72644743	leanveh	dbveh	OK	0.508761	4.79928	3.23776	0.0003
Efhd1	chr1:89160938-89207366	leanveh	dbveh	OK	40.844	2.58402	-3.98243	0.0003
Itpripl2	chr7:125628625-125635489	leanveh	dbveh	OK	9.54003	25.6138	1.42485	0.0003
Myo5b	chr18:74602272-74931131	leanveh	dbveh	OK	10.567	1.64938	-2.67957	0.0003
Serpinb6a	chr13:34009786-34094663	leanveh	dbveh	OK	91.193	290.409	1.67109	0.0003
Sfmbt2	chr2:10292077-10516880	leanveh	dbveh	OK	1.62738	0.210225	-2.95255	0.0003
Mfap3l	chr8:63111656-63155528	leanveh	dbveh	OK	14.1035	4.38263	-1.68618	0.0003
Capn9	chr8:127100010-127142631	leanveh	dbveh	OK	0.380371	2.94165	2.95115	0.0003
Isyna1	chr8:73118379-73121189	leanveh	dbveh	OK	61.6165	19.7279	-1.64308	0.0003
Wnk4	chr11:101121880-101138723	leanveh	dbveh	OK	10.3438	0.926015	-3.48158	0.0003
F2r	chr13:96371743-96388388	leanveh	dbveh	OK	7.14711	22.7395	1.66977	0.0003
Gprc5c	chr11:114712845-114733931	leanveh	dbveh	OK	26.366	8.11559	-1.69991	0.0003
Serpina1b	chr12:104966365-104976399	leanveh	dbveh	OK	7.19226	86.7238	3.59191	0.00035
Hspa1l	chr17:35109647-35116173	leanveh	dbveh	OK	16.5126	1.18179	-3.80452	0.00035
Eps8	chr6:137425765-137597641	leanveh	dbveh	OK	10.5979	29.5235	1.47808	0.00035
Ptprj	chr2:90269912-90420804	leanveh	dbveh	OK	4.97379	14.4126	1.53491	0.00035
Gla	chrX:131122707-131135544	leanveh	dbveh	OK	4.05904	24.2952	2.58146	0.00035
Fbxo21	chr5:118426778-118460200	leanveh	dbveh	OK	77.1647	31.8545	-1.27644	0.00035
Angel1	chr12:88041451-88067410	leanveh	dbveh	OK	11.3201	2.27843	-2.31278	0.00035
Stab1	chr14:31948038-31981827	leanveh	dbveh	OK	10.1067	29.2517	1.53321	0.00035
Tppp3	chr8:107991391-107995322	leanveh	dbveh	OK	55.5973	15.5114	-1.84169	0.00035
Sema4d	chr13:51796616-51889013	leanveh	dbveh	OK	3.00698	10.1856	1.76014	0.00035
Csf2ra	chr19:61300304-61304321	leanveh	dbveh	OK	16.1474	54.3053	1.74979	0.00035
Cmpk1	chr4:114633217-114659833	leanveh	dbveh	OK	45.7915	116.403	1.34597	0.00035
Slc12a2	chr18:58038331-58106475	leanveh	dbveh	OK	13.9782	4.67881	-1.57897	0.00035
Sult1e1	chr5:88004992-88020636	leanveh	dbveh	OK	33.919	4.48855	-2.91777	0.00035
Cpn1	chr19:44030797-44061010	leanveh	dbveh	OK	15.5572	2.39887	-2.69715	0.00035
Hoxd4	chr2:74548100-74586328	leanveh	dbveh	OK	21.7286	4.23853	-2.35796	0.00035
Lhfpl2	chr13:94827750-94965364	leanveh	dbveh	OK	31.477	89.7244	1.5112	0.00035
Aspg	chr12:113344893-113365784	leanveh	dbveh	OK	22.5519	4.03141	-2.48389	0.00035
Tnnt2	chr1:137732962-137748838	leanveh	dbveh	OK	8.31492	0.201897	-5.36401	0.00035
Ccdc114	chr7:53183767-53204326	leanveh	dbveh	OK	6.24601	0.724629	-3.10762	0.00035
Gm216	chr1:74408681-74415895	leanveh	dbveh	OK	5.50782	0.688006	-3.00099	0.00035
Sdc4	chr2:164249746-164268688	leanveh	dbveh	OK	34.79	83.5399	1.26379	0.00035
Svep1	chr4:58055667-58219468	leanveh	dbveh	OK	5.60708	15.4771	1.46481	0.00035
Gm4956	chr1:21275326-21288393	leanveh	dbveh	OK	3.90314	0.501671	-2.95982	0.00035
Mt3	chr8:96676506-96678048	leanveh	dbveh	OK	53.2032	6.56616	-3.01839	0.00035
Celsr2	chr3:108193765-108218412	leanveh	dbveh	OK	3.51842	0.319547	-3.46083	0.00035
Ms4a6d	chr19:11661095-11679294	leanveh	dbveh	OK	5.27087	78.2887	3.89269	0.0004
Col14a1	chr15:55139304-55352358	leanveh	dbveh	OK	6.02707	16.9176	1.489	0.0004
Kcnu1	chr8:26960094-27048406	leanveh	dbveh	OK	2.46991	0.223855	-3.46382	0.0004
Gcnt1	chr19:17400630-17447334	leanveh	dbveh	OK	3.32203	12.5344	1.91575	0.0004
Osbpl10	chr9:114976396-115141341	leanveh	dbveh	OK	11.1839	1.07502	-3.37899	0.0004
Scpep1	chr11:88785333-88816756	leanveh	dbveh	OK	28.989	70.0603	1.27309	0.0004
Hexa	chr9:59387473-59412912	leanveh	dbveh	OK	89.1596	229.085	1.36142	0.0004
Tmem53	chr4:116924593-116941185	leanveh	dbveh	OK	42.7185	9.45574	-2.1756	0.0004
Rassf8	chr6:145756902-145766104	leanveh	dbveh	OK	8.26666	29.8615	1.85291	0.0004
Rab11fip4	chr11:79404713-79507514	leanveh	dbveh	OK	6.85615	0.654408	-3.38914	0.0004
Tlr4	chr4:66488844-66503830	leanveh	dbveh	OK	5.60852	16.9532	1.59587	0.0004
Gsta4	chr9:78039772-78057156	leanveh	dbveh	OK	118.453	30.7408	-1.94609	0.0004
6330503K22Rik	chr7:125856124-125880532	leanveh	dbveh	OK	9.87646	2.8225	-1.80702	0.0004
Ttyh2	chr11:114536781-114582298	leanveh	dbveh	OK	21.1078	54.2858	1.3628	0.0004
Gm11710_dup1	chr11:114882041-114888326	leanveh	dbveh	OK	0.28841	2.54721	3.14273	0.0004
Gm5627	chr9:102641977-102659015	leanveh	dbveh	OK	3.01504	24.6321	3.03029	0.0004
Capsl	chr15:9365782-9395790	leanveh	dbveh	OK	7.68119	0.66326	-3.53368	0.0004
Ift80	chr3:68696420-68808492	leanveh	dbveh	OK	6.29688	1.47454	-2.09438	0.0004
Elovl7	chr13:109004597-109077301	leanveh	dbveh	OK	2.20032	0.290245	-2.92237	0.0004
D630045J12Rik	chr6:37998482-38204009	leanveh	dbveh	OK	2.48291	0.297305	-3.06202	0.0004
Trim7	chr11:48639639-48663697	leanveh	dbveh	OK	10.2549	1.12642	-3.1865	0.0004
Pgbd5	chr8:126892948-126957836	leanveh	dbveh	OK	4.03811	0.306608	-3.71921	0.0004
Fndc8	chr11:82705646-82714239	leanveh	dbveh	OK	2.73136	0.284244	-3.26442	0.00045
Tlr8	chrX:163680663-163701720	leanveh	dbveh	OK	1.55019	19.3951	3.64517	0.00045
Fermt3	chr19:7070620-7093959	leanveh	dbveh	OK	4.9829	34.9684	2.81099	0.00045
Cep63	chr9:102488907-102528454	leanveh	dbveh	OK	21.6656	6.00475	-1.85123	0.00045
Igsf8	chr1:174242537-174249966	leanveh	dbveh	OK	21.5469	55.3795	1.36187	0.00045
Dennd4c	chr4:86394458-86496506	leanveh	dbveh	OK	7.81341	19.5173	1.32073	0.00045
Hipk2	chr6:38647838-38826189	leanveh	dbveh	OK	13.04	36.1963	1.4729	0.00045
Cald1	chr6:34659443-34725469	leanveh	dbveh	OK	44.5294	107.622	1.27314	0.00045
Fam164c	chr12:86629540-86640308	leanveh	dbveh	OK	4.27498	0.465407	-3.19936	0.00045
Slc43a2	chr11:75345195-75391074	leanveh	dbveh	OK	12.0436	32.8931	1.44952	0.00045
Plekha6	chr1:135142673-135200012	leanveh	dbveh	OK	11.1254	3.04649	-1.86863	0.00045
Rnf208	chr2:25098448-25099781	leanveh	dbveh	OK	2.79752	0.287627	-3.28187	0.00045
Wdr78	chr4:102710669-102786904	leanveh	dbveh	OK	4.53291	0.47454	-3.25584	0.00045
Gna14	chr19:16510156-16685308	leanveh	dbveh	OK	1.82699	0.150026	-3.60618	0.00045
Adap1	chr5:139747829-139801418	leanveh	dbveh	OK	6.47163	22.5124	1.79852	0.00045
Slc6a6	chr6:91634060-91709057	leanveh	dbveh	OK	35.1036	109.98	1.64755	0.00045
Vldlr	chr19:27291509-27328721	leanveh	dbveh	OK	10.8471	28.4593	1.39159	0.00045
Plcl1	chr1:55462789-55811129	leanveh	dbveh	OK	5.66495	1.21768	-2.21793	0.00045
Nptx1	chr11:119400032-119409134	leanveh	dbveh	OK	1.12292	10.4382	3.21654	0.0005
Klhdc7a	chr4:139518087-139523941	leanveh	dbveh	OK	38.8314	13.9407	-1.47793	0.0005
Ccl8	chr11:81928686-81930301	leanveh	dbveh	OK	47.7289	163.79	1.77892	0.0005
2310022A10Rik	chr7:28338313-28367117	leanveh	dbveh	OK	8.49004	26.6293	1.64917	0.0005
2022-09-11	chr5:93522482-93603984	leanveh	dbveh	OK	7.94708	19.7299	1.31188	0.0005
Rap2b	chr3:61168428-61172625	leanveh	dbveh	OK	8.48962	24.1242	1.50671	0.0005
Wipf1	chr2:73267673-73367467	leanveh	dbveh	OK	9.45263	27.2495	1.52744	0.0005
Lrriq3	chr3:154756397-154857242	leanveh	dbveh	OK	5.44665	0.667202	-3.02917	0.0005
Wdr96	chr19:47811346-47911851	leanveh	dbveh	OK	4.82451	0.426807	-3.49873	0.0005
Wdr1	chr5:38918051-38952834	leanveh	dbveh	OK	47.5543	113.317	1.25272	0.0005
Lmtk3	chr7:53039316-53059500	leanveh	dbveh	OK	1.24492	0.111269	-3.48394	0.0005
Snhg11	chr2:158201373-158211881	leanveh	dbveh	OK	23.6138	10.0022	-1.23931	0.0005
Prpf40b	chr15:99125839-99147438	leanveh	dbveh	OK	18.4244	6.43719	-1.51712	0.0005
Vit	chr17:78907402-79026749	leanveh	dbveh	OK	6.29041	1.08091	-2.54091	0.0005
Cldn22	chr8:48909835-48910829	leanveh	dbveh	OK	10.4286	1.70224	-2.61504	0.0005
Ccno	chr13:113778009-113780986	leanveh	dbveh	OK	4.4094	0.323844	-3.76721	0.0005
Ncam1	chr9:49310250-49607174	leanveh	dbveh	OK	6.4478	0.2015	-4.99995	0.0005
Blvra	chr2:126896392-126922820	leanveh	dbveh	OK	36.9751	106.613	1.52776	0.0005
Grid1	chr14:35633321-36394301	leanveh	dbveh	OK	0.337282	2.50474	2.89263	0.0005
Dusp3	chr11:101832457-101846105	leanveh	dbveh	OK	41.8254	100.175	1.26008	0.0005
Ank3	chr10:68996455-69490184	leanveh	dbveh	OK	6.18204	0.413039	-3.90373	0.0005
Fga	chr3:82830074-82837539	leanveh	dbveh	OK	6.2458	33.5416	2.42499	0.00055
Bgn	chrX:70728973-70741275	leanveh	dbveh	OK	149.993	524.482	1.806	0.00055
Atp8b4	chr2:126146708-126317289	leanveh	dbveh	OK	0.57451	4.88376	3.08759	0.00055
Itga4	chr2:79095582-79269145	leanveh	dbveh	OK	1.37563	4.68605	1.76828	0.00055
Entpd6	chr2:150574816-150597410	leanveh	dbveh	OK	30.6962	11.4205	-1.42643	0.00055
Ccdc162	chr10:41258654-41307559	leanveh	dbveh	OK	2.08191	0.194843	-3.41752	0.00055
Ildr2	chr1:168184269-168246963	leanveh	dbveh	OK	8.34518	1.71283	-2.28456	0.00055
Il4ra	chr7:132695795-132722988	leanveh	dbveh	OK	11.5611	29.0656	1.33003	0.00055
Tmem64	chr4:15192966-15213900	leanveh	dbveh	OK	52.0223	10.8992	-2.2549	0.00055
Arhgef6	chrX:54484661-54591906	leanveh	dbveh	OK	6.91339	19.3895	1.48781	0.00055
Retnla	chr16:48842664-48844574	leanveh	dbveh	OK	424.357	167.57	-1.34052	0.0006
Zpbp2	chr11:98412410-98419979	leanveh	dbveh	OK	17.6705	0.118241	-7.22346	0.0006
Nphp1	chr2:127566467-127614590	leanveh	dbveh	OK	30.4298	8.47491	-1.84421	0.0006
Fam49b	chr15:63760648-63892010	leanveh	dbveh	OK	8.19897	22.1562	1.43419	0.0006
Ica1l	chr1:60045911-60099931	leanveh	dbveh	OK	2.0645	0.211999	-3.28367	0.0006
Rasl2-9-ps	chr7:5076543-5077552	leanveh	dbveh	OK	12.1245	0.898554	-3.75417	0.0006
Sox8	chr17:25702837-25707631	leanveh	dbveh	OK	2.95852	0.262828	-3.49268	0.0006
Gna12	chr5:141235897-141306385	leanveh	dbveh	OK	25.3388	63.3965	1.32305	0.0006
Rbfox3	chr11:118351073-118770886	leanveh	dbveh	OK	1.7097	0.101063	-4.08042	0.0006
Tpm4	chr8:74659190-74677028	leanveh	dbveh	OK	91.646	243.82	1.41167	0.0006
Hhipl1	chr12:109544479-109566510	leanveh	dbveh	OK	0.606409	4.24489	2.80737	0.0006
Ap3s1	chr18:46901570-46950480	leanveh	dbveh	OK	48.8579	117.594	1.26715	0.0006
Tulp2	chr7:52769075-52777973	leanveh	dbveh	OK	34.5905	0.377146	-6.51911	0.00065
Pde1c	chr6:56019797-56319628	leanveh	dbveh	OK	2.73862	0.0357912	-6.2577	0.00065
P2ry6	chr7:108086147-108112880	leanveh	dbveh	OK	6.80452	36.885	2.43847	0.00065
Actr3	chr1:127289481-127332304	leanveh	dbveh	OK	46.2308	120.235	1.37894	0.00065
Naa50	chr16:44139921-44163477	leanveh	dbveh	OK	27.7588	67.8052	1.28845	0.00065
Mmp11	chr10:75385968-75395208	leanveh	dbveh	OK	6.70041	23.4516	1.80736	0.00065
Mlph	chr1:92811676-92847719	leanveh	dbveh	OK	20.5674	1.39837	-3.87854	0.00065
Alms1	chr6:85537524-85652745	leanveh	dbveh	OK	2.45647	0.608763	-2.01263	0.00065
Ccl7	chr11:81859213-81861025	leanveh	dbveh	OK	3.53177	32.6805	3.20997	0.00065
Abca6	chr11:110038135-110113090	leanveh	dbveh	OK	1.55817	6.28675	2.01246	0.00065
Fgfr2	chr7:137305964-137410322	leanveh	dbveh	OK	9.13551	1.35682	-2.75125	0.00065
Serpinb6b	chr13:33057381-33070906	leanveh	dbveh	OK	8.43329	29.1918	1.79139	0.0007
Apoh	chr11:108256610-108275710	leanveh	dbveh	OK	6.13365	54.7064	3.15689	0.0007
Myof	chr19:37973525-38118067	leanveh	dbveh	OK	7.35835	19.1815	1.38226	0.0007
Adam1a	chr5:121968612-121971704	leanveh	dbveh	OK	5.46834	0.623624	-3.13235	0.0007
1700001O22Rik	chr2:30651082-30659184	leanveh	dbveh	OK	10.0495	0.308485	-5.02578	0.0007
Rasd1	chr11:59761715-59778444	leanveh	dbveh	OK	116.106	27.2414	-2.09157	0.0007
Fam111a	chr19:12648014-12671056	leanveh	dbveh	OK	4.60116	19.0877	2.05257	0.0007
Ddr1	chr17:35818511-35841084	leanveh	dbveh	OK	26.6479	8.52795	-1.64375	0.0007
Kcnk6	chr7:30006946-30017541	leanveh	dbveh	OK	3.28518	10.8793	1.72754	0.0007
Cldn1	chr16:26356731-26371925	leanveh	dbveh	OK	3.4284	0.611838	-2.48631	0.0007
4921536K21Rik	chr11:3786090-3795129	leanveh	dbveh	OK	4.59701	0.603572	-2.9291	0.0007
Ttc16	chr2:32612790-32630903	leanveh	dbveh	OK	4.58113	0.0693631	-6.04539	0.0007
Htra3	chr5:35994681-36022431	leanveh	dbveh	OK	99.0781	309.339	1.64255	0.0007
Rtn4	chr11:29592897-29926033	leanveh	dbveh	OK	71.398	227.736	1.6734	0.0007
Tmem189	chr2:167468724-167487044	leanveh	dbveh	OK	55.4154	133.044	1.26355	0.0007
Scml4	chr10:42580317-42680588	leanveh	dbveh	OK	2.7011	0.426976	-2.66132	0.0007
Pde7a	chr3:19125917-19211322	leanveh	dbveh	OK	8.19111	23.4883	1.51981	0.0007
Serpina3n	chr12:105644917-105652539	leanveh	dbveh	OK	160.014	642.93	2.00646	0.0007
AU021092	chr16:5211911-5222392	leanveh	dbveh	OK	6.45655	0.880985	-2.87357	0.0007
Tprn	chr2:25118117-25125406	leanveh	dbveh	OK	19.1925	5.38913	-1.83242	0.0007
Fam20c	chr5:139231034-139286017	leanveh	dbveh	OK	20.2512	49.37	1.28563	0.0007
Tmem27	chrX:160528118-160556791	leanveh	dbveh	OK	19.4343	2.86201	-2.7635	0.0007
St8sia2	chr7:81084005-81158568	leanveh	dbveh	OK	2.00797	0.341652	-2.55514	0.0007
Dact2	chr17:14332236-14340838	leanveh	dbveh	OK	6.16865	1.04115	-2.56678	0.0007
Osgin1	chr8:121961061-121970156	leanveh	dbveh	OK	29.0671	70.097	1.26997	0.0007
Ctsd	chr7:149561820-149573775	leanveh	dbveh	OK	474.106	2705.55	2.51264	0.0007
Lpar2	chr8:72346463-72355001	leanveh	dbveh	OK	2.45487	0.352287	-2.80083	0.0007
Cxcr4	chr1:130484775-130488876	leanveh	dbveh	OK	9.91883	35.549	1.84157	0.00075
Fbxw10	chr11:62660624-62690964	leanveh	dbveh	OK	6.72831	0.705142	-3.25426	0.00075
Sdcbp	chr4:6292826-6323269	leanveh	dbveh	OK	82.5133	223.355	1.43664	0.00075
1700021C14Rik	chr3:88086681-88100760	leanveh	dbveh	OK	18.6625	2.28901	-3.02735	0.00075
2610020H08Rik	chr7:126937643-126992455	leanveh	dbveh	OK	13.8558	2.23011	-2.63531	0.00075
Ankrd29	chr18:12410865-12464229	leanveh	dbveh	OK	8.96749	2.17204	-2.04566	0.00075
Apoa2	chr1:173155184-173156510	leanveh	dbveh	OK	69.0061	705.75	3.35436	0.0008
Best1	chr19:10059661-10076123	leanveh	dbveh	OK	5.08799	0.532477	-3.25631	0.0008
Fam187b	chr7:31758822-31774744	leanveh	dbveh	OK	13.5695	0.515344	-4.71869	0.0008
Ccdc136	chr6:29348925-29376995	leanveh	dbveh	OK	39.5667	0.364938	-6.76049	0.0008
Ptchd1	chrX:152004278-152057870	leanveh	dbveh	OK	0.274133	2.06133	2.91063	0.0008
4930578N16Rik	chr2:69596113-69627543	leanveh	dbveh	OK	6.3286	0.838754	-2.91557	0.0008
Trim37	chr11:86940578-87034184	leanveh	dbveh	OK	18.2193	5.76499	-1.66008	0.0008
Arl11	chr14:61928589-61930773	leanveh	dbveh	OK	2.43817	19.2766	2.98298	0.0008
1700029J07Rik	chr8:47038959-47060606	leanveh	dbveh	OK	4.84444	0.640677	-2.91866	0.0008
Ucp2	chr7:107641853-107650682	leanveh	dbveh	OK	73.8959	252.351	1.77187	0.0008
Gm5465	chr14:79851641-79854623	leanveh	dbveh	OK	1.52381	0.23494	-2.69732	0.0008
Mgat3	chr15:80004150-80045949	leanveh	dbveh	OK	7.12867	1.71515	-2.0553	0.0008
Podn	chr4:107687397-107704695	leanveh	dbveh	OK	36.1946	15.085	-1.26266	0.0008
Glb1l2	chr9:26570628-26614002	leanveh	dbveh	OK	139.045	40.4092	-1.78279	0.00085
Atp6ap2	chrX:12164884-12194177	leanveh	dbveh	OK	33.9055	81.9497	1.27322	0.00085
Fam183b	chr11:58606303-58615462	leanveh	dbveh	OK	21.4223	2.85884	-2.90561	0.00085
Ivns1abp	chr1:153191627-153211575	leanveh	dbveh	OK	202.327	70.8607	-1.51363	0.00085
Pde1b	chr15:103333728-103360483	leanveh	dbveh	OK	6.54341	25.3872	1.95598	0.00085
Ctsl	chr13:64464521-64471614	leanveh	dbveh	OK	233.453	1575.24	2.75437	0.00085
Mbnl2	chr14:120674890-120830920	leanveh	dbveh	OK	37.7243	91.8404	1.28363	0.00085
Acpp	chr9:104190569-104240052	leanveh	dbveh	OK	6.24849	0.782812	-2.99677	0.00085
Ppp1r9a	chr6:4853319-5115661	leanveh	dbveh	OK	6.44744	2.28335	-1.49758	0.00085
Cx3cl1	chr8:97296079-97306326	leanveh	dbveh	OK	12.8066	4.06427	-1.65582	0.00085
Mapk4	chr18:74088140-74224603	leanveh	dbveh	OK	2.35877	0.374032	-2.6568	0.00085
Thbd	chr2:148230206-148233924	leanveh	dbveh	OK	65.0266	27.2493	-1.25481	0.00085
Tgfbr2	chr9:115996812-116084481	leanveh	dbveh	OK	30.463	76.4849	1.32812	0.00085
Gltpd2	chr11:70332710-70334238	leanveh	dbveh	OK	0.636826	4.15605	2.70624	0.0009
Ttpa	chr4:19935574-19957932	leanveh	dbveh	OK	3.42355	16.1791	2.24056	0.0009
Ssx2ip	chr3:146067650-146103101	leanveh	dbveh	OK	16.872	4.82514	-1.80599	0.0009
Emp3	chr7:53173392-53176796	leanveh	dbveh	OK	24.3128	91.0126	1.90435	0.0009
Dnaic1	chr4:41516826-41587335	leanveh	dbveh	OK	5.87612	0.0740765	-6.3097	0.0009
6720401G13Rik	chrX:47908920-47988435	leanveh	dbveh	OK	23.9284	10.1297	-1.24013	0.0009
AF251705	chr11:114858082-114863194	leanveh	dbveh	OK	4.03104	31.6078	2.97106	0.0009
H1fx	chr6:87930414-87931476	leanveh	dbveh	OK	36.1912	8.17973	-2.14551	0.0009
Mical2	chr7:119369349-119498708	leanveh	dbveh	OK	8.34715	19.146	1.19769	0.0009
Litaf	chr16:10959365-10993214	leanveh	dbveh	OK	34.8112	86.223	1.30852	0.0009
Synm	chr7:74875046-74904628	leanveh	dbveh	OK	9.38683	2.78701	-1.75192	0.0009
Mtap7d1	chr4:125909411-125933563	leanveh	dbveh	OK	42.75	101.446	1.24672	0.0009
Rlf	chr4:120817977-120861139	leanveh	dbveh	OK	6.43348	15.7004	1.28713	0.0009
Igf2bp2	chr16:22059081-22163372	leanveh	dbveh	OK	2.58858	11.9495	2.20671	0.00095
Hs6st1	chr1:36125244-36163291	leanveh	dbveh	OK	13.9105	34.5521	1.3126	0.00095
Acer3	chr7:105362169-105458037	leanveh	dbveh	OK	3.96405	13.5041	1.76835	0.00095
Ifi27l2a	chr12:104680376-104681890	leanveh	dbveh	OK	812.241	337.047	-1.26896	0.00095
Uap1l1	chr2:25217011-25221146	leanveh	dbveh	OK	10.6522	34.7452	1.70567	0.00095
Gna13	chr11:109216091-109262683	leanveh	dbveh	OK	13.7763	29.8916	1.11755	0.00095
Clec4a3	chr6:122902532-122919896	leanveh	dbveh	OK	9.47047	45.0883	2.25125	0.00095
Ccl4	chr11:83476085-83478185	leanveh	dbveh	OK	0.75218	6.11319	3.02278	0.00095
Trp63	chr16:25683850-25892174	leanveh	dbveh	OK	1.9727	0.162518	-3.6015	0.00095
Msi1	chr5:115879693-115904211	leanveh	dbveh	OK	8.13544	1.16469	-2.80427	0.00095
Ptpn13	chr5:103854210-104027380	leanveh	dbveh	OK	8.89474	2.9594	-1.58765	0.00095
Lamc3	chr2:31742800-31802055	leanveh	dbveh	OK	7.59641	2.39487	-1.66537	0.00095
Cyb5r3	chr15:82983931-83002638	leanveh	dbveh	OK	123.12	299.128	1.2807	0.00095
Tert	chr13:73764448-73786489	leanveh	dbveh	OK	1.45881	0.171904	-3.08512	0.00095
Odf2	chr2:29745239-29787266	leanveh	dbveh	OK	142.534	19.5925	-2.86293	0.001
Vegfa	chr17:46153942-46169326	leanveh	dbveh	OK	91.4116	33.2715	-1.45809	0.001
Psd4	chr2:24240916-24264249	leanveh	dbveh	OK	2.05894	9.02974	2.13278	0.001
Camk2n1	chr4:138011062-138016041	leanveh	dbveh	OK	16.8949	5.94431	-1.507	0.001
Stk36	chr1:74648028-74683467	leanveh	dbveh	OK	5.21078	0.623089	-3.06399	0.001
Dok2	chr14:71174187-71178301	leanveh	dbveh	OK	10.5182	36.4432	1.79276	0.001
Stard10	chr7:108469832-108494826	leanveh	dbveh	OK	125.023	41.4793	-1.59173	0.001
Orm1	chr4:63005599-63009196	leanveh	dbveh	OK	116.51	301.669	1.37251	0.001
Rab11fip3	chr17:26125980-26206122	leanveh	dbveh	OK	17.0298	6.69046	-1.34788	0.001
Fzd6	chr15:38837825-38869736	leanveh	dbveh	OK	14.3317	3.38747	-2.08093	0.001
4933411K20Rik	chr8:47254909-47280944	leanveh	dbveh	OK	15.9873	5.13546	-1.63836	0.001
Ldhb	chr6:142438768-142456463	leanveh	dbveh	OK	68.8108	18.9571	-1.8599	0.001
Prtn3	chr10:79342411-79345917	leanveh	dbveh	OK	24.7985	3.02526	-3.03512	0.001
Tcfcp2l1	chr1:120524521-120581745	leanveh	dbveh	OK	3.0684	0.430114	-2.83469	0.001
Coro1a	chr7:133843287-133848268	leanveh	dbveh	OK	12.9584	45.4233	1.80954	0.00105
Rhog	chr7:109387636-109398632	leanveh	dbveh	OK	39.2213	94.2537	1.26491	0.00105
Plcd4	chr1:74455957-74634602	leanveh	dbveh	OK	5.01136	0.0614551	-6.34952	0.00105
Msc	chr1:14743428-14746047	leanveh	dbveh	OK	1.17833	7.42982	2.65659	0.00105
Pld4	chr12:113998865-114007197	leanveh	dbveh	OK	14.4525	43.0329	1.57413	0.00105
Capn2	chr1:184397389-184447614	leanveh	dbveh	OK	58.2869	135.389	1.21587	0.00105
Chd5	chr4:151712759-151764303	leanveh	dbveh	OK	3.8669	0.484485	-2.99665	0.0011
Ifi30	chr8:73286671-73290562	leanveh	dbveh	OK	50.4219	137.067	1.44276	0.0011
4930505A04Rik	chr11:30326005-30371829	leanveh	dbveh	OK	6.74909	0.957199	-2.8178	0.0011
Kcnn4	chr7:25155281-25170231	leanveh	dbveh	OK	6.73144	26.7439	1.99022	0.0011
Matn2	chr15:34236435-34365995	leanveh	dbveh	OK	26.2243	59.9277	1.19232	0.0011
Clec7a	chr6:129411608-129422795	leanveh	dbveh	OK	5.76838	28.2368	2.29134	0.0011
Capza2	chr6:17587097-17616536	leanveh	dbveh	OK	79.679	176.758	1.14951	0.0011
Rab44	chr17:29272000-29285921	leanveh	dbveh	OK	1.69432	0.237196	-2.83655	0.0011
Smpdl3a	chr10:57514349-57531636	leanveh	dbveh	OK	60.2342	137.906	1.19503	0.0011
Art3	chr5:92760866-92843653	leanveh	dbveh	OK	138.887	58.0729	-1.25797	0.00115
Mum1	chr10:79689342-79707889	leanveh	dbveh	OK	37.5225	16.2934	-1.20346	0.00115
Cdt1	chr8:125091914-125097030	leanveh	dbveh	OK	3.559	15.2115	2.09561	0.00115
Pip4k2a	chr2:18763882-18919748	leanveh	dbveh	OK	8.19988	23.8913	1.54281	0.00115
Ccdc62	chr5:124380697-124419904	leanveh	dbveh	OK	7.94685	0.899142	-3.14376	0.00115
Arpc1b	chr5:145875124-145889055	leanveh	dbveh	OK	155.785	408.482	1.39072	0.00115
Ankrd54	chr15:78883523-78893289	leanveh	dbveh	OK	26.0856	8.23674	-1.66311	0.00115
Tnfrsf26	chr7:150793589-150813750	leanveh	dbveh	OK	0.441638	2.77615	2.65215	0.00115
Spag1	chr15:36109284-36164932	leanveh	dbveh	OK	4.19531	0.584248	-2.84412	0.00115
Strbp	chr2:37425387-37502805	leanveh	dbveh	OK	2.52934	0.570502	-2.14846	0.00115
Tmem107	chr11:68884310-68886795	leanveh	dbveh	OK	15.2744	2.95394	-2.37041	0.00115
Rab31	chr17:66001065-66122092	leanveh	dbveh	OK	17.198	46.5578	1.43679	0.00115
Il6ra	chr3:89673245-89717084	leanveh	dbveh	OK	8.25681	23.2908	1.4961	0.00115
Akr1b8	chr6:34304163-34318454	leanveh	dbveh	OK	33.7912	84.5467	1.3231	0.00115
Fn1	chr1:71632096-71699745	leanveh	dbveh	OK	25.2645	83.4883	1.72446	0.0012
Ms4a7	chr19:11395897-11410606	leanveh	dbveh	OK	4.81013	35.4601	2.88205	0.0012
Anubl1	chr6:116214252-116279644	leanveh	dbveh	OK	9.39494	1.12744	-3.05884	0.0012
B4galt5	chr2:167123944-167174678	leanveh	dbveh	OK	6.39103	18.3414	1.52098	0.0012
Zeb2	chr2:44839153-44969604	leanveh	dbveh	OK	17.2112	42.4919	1.30384	0.0012
Spata22	chr11:73143242-73159546	leanveh	dbveh	OK	4.03848	0.55389	-2.86614	0.0012
Elf4	chrX:45764225-45816309	leanveh	dbveh	OK	3.75222	10.4277	1.4746	0.0012
Serpinb8	chr1:109486582-109505555	leanveh	dbveh	OK	3.51534	14.0061	1.99432	0.0012
Tnfrsf13b	chr11:60954336-60961144	leanveh	dbveh	OK	0.55611	4.0179	2.853	0.0012
Hprt	chrX:50341254-50374837	leanveh	dbveh	OK	89.3323	194.345	1.12137	0.0012
Plekha2	chr8:26149616-26212283	leanveh	dbveh	OK	10.7812	25.3936	1.23594	0.0012
Pkdcc	chr17:83614622-83624409	leanveh	dbveh	OK	31.5082	11.2191	-1.48977	0.0012
1700001L05Rik	chr15:83184276-83197727	leanveh	dbveh	OK	7.87655	0.798145	-3.30284	0.00125
Asprv1	chr6:86578167-86579698	leanveh	dbveh	OK	0.290163	1.87331	2.69065	0.00125
Sgcg	chr14:61757293-61877327	leanveh	dbveh	OK	15.4031	3.74089	-2.04177	0.00125
Ly9	chr1:173518743-173537491	leanveh	dbveh	OK	1.80958	13.6277	2.91281	0.00125
Bcl2a1b	chr9:89094110-89102676	leanveh	dbveh	OK	4.6252	28.2807	2.61223	0.00125
Mosc1	chr1:186610645-186635192	leanveh	dbveh	OK	6.04014	28.8262	2.25473	0.00125
Hoxb8	chr11:96143218-96146639	leanveh	dbveh	OK	24.0828	4.72607	-2.34929	0.00125
Lgr4	chr2:109757803-109854414	leanveh	dbveh	OK	15.1037	33.8604	1.1647	0.00125
Rnasel	chr1:155596555-155611351	leanveh	dbveh	OK	10.663	25.3772	1.25092	0.00125
Nup210	chr6:90963060-91066820	leanveh	dbveh	OK	5.53563	1.27988	-2.11274	0.0013
Cox6b2	chr7:4703395-4704696	leanveh	dbveh	OK	38.0911	3.20696	-3.57018	0.0013
Clu	chr14:66587319-66600382	leanveh	dbveh	OK	356.436	55.6542	-2.67908	0.0013
Catsper2	chr2:121220090-121239528	leanveh	dbveh	OK	9.27339	1.21238	-2.93525	0.0013
Arpc5	chr1:154613671-154622710	leanveh	dbveh	OK	95.3343	221.801	1.2182	0.0013
Car12	chr9:66561492-66614652	leanveh	dbveh	OK	2.30099	0.373639	-2.62254	0.0013
Angptl4	chr17:33911844-33918520	leanveh	dbveh	OK	204.749	613.107	1.58228	0.0013
Pebp1	chr5:117732659-117737573	leanveh	dbveh	OK	286.302	99.6102	-1.52317	0.0013
Klhl23	chr2:69660426-69674708	leanveh	dbveh	OK	7.33473	0.8489	-3.11108	0.0013
Maff	chr15:79178107-79189506	leanveh	dbveh	OK	6.34607	28.8558	2.18493	0.0013
Ell2	chr13:75844931-75909806	leanveh	dbveh	OK	19.723	43.7596	1.14972	0.0013
Degs1	chr1:184205900-184212890	leanveh	dbveh	OK	85.8822	196.208	1.19195	0.0013
Adam12	chr7:141074882-141416780	leanveh	dbveh	OK	2.44863	8.90037	1.86189	0.00135
St3gal5	chr6:72047606-72104564	leanveh	dbveh	OK	11.0922	33.4055	1.59054	0.00135
Gpr133	chr5:129602624-129710474	leanveh	dbveh	OK	4.92293	13.8178	1.48894	0.00135
Bst1	chr5:44210131-44234707	leanveh	dbveh	OK	2.57854	22.7072	3.13853	0.00135
Abca9	chr11:109962135-110029467	leanveh	dbveh	OK	3.30547	9.12211	1.46451	0.00135
Lcp2	chr11:33947200-33992280	leanveh	dbveh	OK	2.87411	12.7778	2.15245	0.00135
St8sia4	chr1:97484258-97564171	leanveh	dbveh	OK	3.62849	12.3951	1.77233	0.00135
Ldlrap1	chr4:134301326-134323919	leanveh	dbveh	OK	12.0303	29.216	1.28008	0.00135
Dnali1	chr4:124707257-124742901	leanveh	dbveh	OK	11.2997	0.0558949	-7.65935	0.00135
Rbm28	chr6:29073572-29114724	leanveh	dbveh	OK	16.3658	36.1942	1.14508	0.00135
Rassf10	chr7:120097475-120100972	leanveh	dbveh	OK	3.62058	0.579731	-2.64277	0.00135
Ss18l1	chr2:179777187-179804906	leanveh	dbveh	OK	10.7853	3.01241	-1.84007	0.00135
Pcdh7	chr5:58109259-58523479	leanveh	dbveh	OK	7.83311	19.6314	1.3255	0.0014
Shisa2	chr14:60244117-60250497	leanveh	dbveh	OK	4.14169	0.654862	-2.66096	0.0014
Adcy3	chr12:4133396-4240123	leanveh	dbveh	OK	6.62844	31.1013	2.23023	0.0014
Ms4a6b	chr19:11593048-11604893	leanveh	dbveh	OK	6.94219	30.8857	2.15348	0.0014
Dusp15	chr2:152766730-152777318	leanveh	dbveh	OK	4.35979	0.37327	-3.54597	0.0014
Mid1ip1	chrX:10294490-10296828	leanveh	dbveh	OK	95.7692	35.5914	-1.42803	0.0014
Fam174b	chr7:80885192-80921805	leanveh	dbveh	OK	10.4986	2.71959	-1.94873	0.0014
Slc16a2	chrX:100892752-101017327	leanveh	dbveh	OK	13.5304	4.85976	-1.47724	0.0014
Lrrc8e	chr8:4226826-4237470	leanveh	dbveh	OK	2.7039	0.240539	-3.4907	0.0014
Tnfrsf23	chr7:150851711-150871777	leanveh	dbveh	OK	0.925977	7.08011	2.93472	0.0014
Hoxb7	chr11:96147959-96151477	leanveh	dbveh	OK	26.1526	6.24378	-2.06646	0.0014
Cytl1	chr5:38126757-38131059	leanveh	dbveh	OK	20.4466	3.65204	-2.48509	0.0014
Pon2	chr6:5214623-5248373	leanveh	dbveh	OK	54.8602	125.115	1.18943	0.0014
Asgr2	chr11:69906145-69919688	leanveh	dbveh	OK	1.5367	8.68402	2.49853	0.00145
Zpbp	chr11:11180042-11362422	leanveh	dbveh	OK	4.05428	0.527121	-2.94324	0.00145
Lrp12	chr15:39702148-39775303	leanveh	dbveh	OK	7.43793	17.7225	1.25261	0.00145
Tubb3	chr8:125935463-125945910	leanveh	dbveh	OK	8.82256	0.812186	-3.44132	0.00145
Smap2	chr4:120640921-120689852	leanveh	dbveh	OK	13.9265	32.2908	1.21329	0.00145
4933430H15Rik	chr3:87422672-87552545	leanveh	dbveh	OK	7.27838	0.237781	-4.93591	0.00145
Echdc2	chr4:107838070-107851913	leanveh	dbveh	OK	62.776	23.056	-1.44507	0.00145
2310016C08Rik	chr6:29222487-29225449	leanveh	dbveh	OK	13.6291	66.555	2.28786	0.00145
Csf2rb2	chr15:78112939-78136033	leanveh	dbveh	OK	4.48906	12.387	1.46434	0.00145
Ceacam16	chr7:20437445-20446648	leanveh	dbveh	OK	0.212608	1.61224	2.9228	0.00145
Hspa4l	chr3:40549534-40594287	leanveh	dbveh	OK	29.5449	8.97097	-1.71957	0.0015
Kap	chr6:133799872-133803685	leanveh	dbveh	OK	375.085	90.764	-2.04703	0.0015
Galnt6	chr15:100520345-100559807	leanveh	dbveh	OK	0.67845	13.6418	4.32965	0.0015
Tuba1c	chr15:98860321-98868536	leanveh	dbveh	OK	10.0844	33.9992	1.75338	0.0015
Cenpv	chr11:62338445-62352763	leanveh	dbveh	OK	35.015	9.25268	-1.92003	0.0015
Shroom1	chr11:53270706-53281257	leanveh	dbveh	OK	4.41969	0.8141	-2.44067	0.0015
Pros1	chr16:62854159-62929166	leanveh	dbveh	OK	26.8276	58.5011	1.12475	0.0015
Sgpl1	chr10:60561389-60610413	leanveh	dbveh	OK	39.7291	92.9776	1.22669	0.0015
Vwa1	chr4:155142603-155148670	leanveh	dbveh	OK	13.3857	4.51285	-1.56858	0.0015
Zfp184	chr13:22036962-22052354	leanveh	dbveh	OK	1.17582	0.168433	-2.80342	0.0015
Miox	chr15:89164903-89167438	leanveh	dbveh	OK	24.722	4.33002	-2.51335	0.0015
Rnf186	chr4:138523026-138524281	leanveh	dbveh	OK	4.72887	0.638415	-2.88893	0.0015
Adam19	chr11:45869488-45960844	leanveh	dbveh	OK	3.33638	8.74077	1.38948	0.00155
Scd3	chr19:44277777-44318506	leanveh	dbveh	OK	1.62754	0.248132	-2.71352	0.00155
Tmem65	chr15:58613823-58654982	leanveh	dbveh	OK	22.9834	49.2343	1.09907	0.00155
Fam154b	chr7:89781469-89797038	leanveh	dbveh	OK	2.08349	0.221186	-3.23567	0.00155
Mt1	chr8:96702988-96704227	leanveh	dbveh	OK	550.71	1295.06	1.23366	0.00155
Zfyve28	chr5:34537542-34630973	leanveh	dbveh	OK	1.79269	7.04033	1.97351	0.00155
Atp1a4	chr1:174153638-174188555	leanveh	dbveh	OK	6.84868	0.837364	-3.0319	0.0016
Actr2	chr11:19962306-20012954	leanveh	dbveh	OK	43.3252	101.374	1.22641	0.0016
4930506M07Rik	chr19:59047847-59150559	leanveh	dbveh	OK	5.94195	18.4676	1.63599	0.0016
Dhcr7	chr7:151009071-151034315	leanveh	dbveh	OK	7.92268	21.2968	1.42658	0.0016
Gkap1	chr13:58334711-58375549	leanveh	dbveh	OK	39.1865	11.916	-1.71746	0.0016
Fam48a	chr3:54497026-54520759	leanveh	dbveh	OK	37.4214	15.0643	-1.31273	0.0016
9030425E11Rik	chr9:40494046-40592129	leanveh	dbveh	OK	8.44908	22.7357	1.42809	0.0016
Rgs7bp	chr13:105737232-105845010	leanveh	dbveh	OK	3.90393	1.10236	-1.82434	0.0016
Fbp2	chr13:62938244-62959730	leanveh	dbveh	OK	9.28297	1.4554	-2.67317	0.0016
Lcat	chr8:108463450-108467302	leanveh	dbveh	OK	1.86789	10.7408	2.52361	0.00165
Nrcam	chr12:45429871-45702833	leanveh	dbveh	OK	0.889044	6.60124	2.89241	0.00165
Llgl2	chr11:115685371-115717094	leanveh	dbveh	OK	16.3685	5.70599	-1.52037	0.00165
Arhgef37	chr18:61653447-61696190	leanveh	dbveh	OK	3.09232	12.2754	1.98901	0.00165
Sirpb1b	chr3:15495753-15575065	leanveh	dbveh	OK	0.284322	1.9859	2.80419	0.00165
Amph	chr13:19040239-19242784	leanveh	dbveh	OK	1.21202	0.152933	-2.98644	0.00165
Bzrap1	chr11:87574042-87599430	leanveh	dbveh	OK	1.56067	0.254492	-2.61647	0.00165
Col6a3	chr1:92663434-92740548	leanveh	dbveh	OK	17.9779	48.7401	1.43888	0.0017
Creb3l4	chr3:90041421-90047434	leanveh	dbveh	OK	8.4072	0.884371	-3.2489	0.0017
C230081A13Rik	chr9:56048935-56265857	leanveh	dbveh	OK	6.45793	14.6068	1.17749	0.0017
Egr2	chr10:67000616-67004936	leanveh	dbveh	OK	2.82623	10.0152	1.82524	0.0017
1500009L16Rik	chr10:83185609-83225507	leanveh	dbveh	OK	5.80466	0.711704	-3.02786	0.0017
Slco4a1	chr2:180195682-180209557	leanveh	dbveh	OK	1.99811	0.315978	-2.66074	0.0017
Chst10	chr1:38920717-38955005	leanveh	dbveh	OK	11.733	1.49306	-2.97423	0.00175
Sash3	chrX:45499703-45514740	leanveh	dbveh	OK	3.39363	13.4575	1.98751	0.00175
Eaf1	chr14:32308264-32323044	leanveh	dbveh	OK	15.1049	33.0283	1.12869	0.00175
Cachd1	chr4:100449283-100676353	leanveh	dbveh	OK	17.3115	6.96508	-1.31352	0.00175
4930473A06Rik	chr4:83171448-83510574	leanveh	dbveh	OK	3.33468	0.477462	-2.80409	0.00175
Csf2rb	chr15:78156419-78181431	leanveh	dbveh	OK	11.7811	27.0553	1.19944	0.00175
Zfp39	chr11:58701654-58717727	leanveh	dbveh	OK	7.73452	2.00924	-1.94466	0.00175
Map3k8	chr18:4331324-4352951	leanveh	dbveh	OK	3.11401	11.1989	1.84651	0.00175
Slc6a9	chr4:117507862-117545075	leanveh	dbveh	OK	11.9873	2.85457	-2.07016	0.00175
Hoxb6	chr11:96160484-96162883	leanveh	dbveh	OK	34.7277	3.75611	-3.20878	0.00175
C4bp	chr1:132532497-132558195	leanveh	dbveh	OK	43.9689	5.42414	-3.01902	0.0018
Npc1	chr18:12327238-12394895	leanveh	dbveh	OK	8.51781	26.1309	1.6172	0.0018
Dyx1c1	chr9:72806591-72820874	leanveh	dbveh	OK	4.83929	0.714397	-2.76	0.0018
Tsku	chr7:105499177-105509838	leanveh	dbveh	OK	9.7125	27.444	1.49858	0.0018
Clec4a1	chr6:122871865-122884637	leanveh	dbveh	OK	7.75623	33.8298	2.12487	0.0018
H2-Eb1	chr17:34442811-34453619	leanveh	dbveh	OK	170.015	80.0025	-1.08755	0.0018
Mfge8	chr7:86278653-86293946	leanveh	dbveh	OK	197.578	1209.24	2.6136	0.0018
Ttr	chr18:20823750-20832827	leanveh	dbveh	OK	12.5112	125.029	3.32097	0.00185
Fstl1	chr16:37777140-37836602	leanveh	dbveh	OK	61.2058	167.411	1.45165	0.00185
Ppm1j	chr3:104583973-104588935	leanveh	dbveh	OK	6.63559	1.02064	-2.70075	0.00185
Letm2	chr8:26688961-26707959	leanveh	dbveh	OK	7.65595	1.17598	-2.70272	0.00185
Tsga10	chr1:37811620-37921924	leanveh	dbveh	OK	6.48051	0.893473	-2.85861	0.00185
Tpm3	chr3:89876615-89904526	leanveh	dbveh	OK	30.3774	68.5904	1.17501	0.00185
Palld	chr8:63993819-64381487	leanveh	dbveh	OK	2.71422	11.6319	2.09947	0.00185
Gns	chr10:120802145-120834301	leanveh	dbveh	OK	69.5803	175.561	1.33522	0.00185
Fam83f	chr15:80502276-80530855	leanveh	dbveh	OK	1.37875	9.98163	2.85591	0.00185
Zranb3	chr1:129850762-129998985	leanveh	dbveh	OK	1.51843	5.49104	1.8545	0.0019
Vwf	chr6:125502980-125636695	leanveh	dbveh	OK	22.4934	9.51935	-1.24057	0.0019
Nin	chr12:71112421-71212912	leanveh	dbveh	OK	5.02469	11.9665	1.25189	0.0019
Hap1	chr11:100208640-100217455	leanveh	dbveh	OK	4.42631	0.275152	-4.0078	0.0019
Adam23	chr1:63492477-63643089	leanveh	dbveh	OK	10.7236	28.4799	1.40915	0.0019
Axin2	chr11:108781662-108812095	leanveh	dbveh	OK	14.7192	5.55262	-1.40645	0.0019
Gpd1	chr15:99548023-99555438	leanveh	dbveh	OK	218.394	644.193	1.56056	0.0019
Pde4dip	chr3:97493751-97692630	leanveh	dbveh	OK	16.7713	7.0585	-1.24856	0.0019
Casp1	chr9:5298516-5307281	leanveh	dbveh	OK	6.19388	22.8136	1.88098	0.0019
Hpdl	chr4:116492511-116494113	leanveh	dbveh	OK	15.1927	2.01818	-2.91225	0.0019
1700029G01Rik	chr4:125827845-125840585	leanveh	dbveh	OK	22.2532	2.75196	-3.01548	0.00195
Adig	chr2:158328347-158333934	leanveh	dbveh	OK	253.427	108.602	-1.22252	0.00195
Nfam1	chr15:82828225-82853568	leanveh	dbveh	OK	4.23592	18.9922	2.16466	0.00195
A930018P22Rik	chr2:103962925-103964903	leanveh	dbveh	OK	6.8581	1.13735	-2.59214	0.00195
Calu	chr6:29298118-29330513	leanveh	dbveh	OK	99.3013	257.761	1.37615	0.00195
Ccdc39	chr3:33699116-33743232	leanveh	dbveh	OK	7.83744	0.19891	-5.3002	0.00195
Ifngr2	chr16:91547338-91564252	leanveh	dbveh	OK	27.3341	58.166	1.08947	0.00195
Mtap1b	chr13:100191418-100286557	leanveh	dbveh	OK	7.30418	3.257	-1.16518	0.00195
Abca7	chr10:79460359-79478317	leanveh	dbveh	OK	4.21157	9.96985	1.24321	0.00195
Cyp2d26	chr15:82620536-82624675	leanveh	dbveh	OK	2.68546	17.1666	2.67637	0.002
Catsperg1	chr7:29966550-29999052	leanveh	dbveh	OK	3.30684	0.509963	-2.69699	0.002
Hip1	chr5:135882387-136020992	leanveh	dbveh	OK	16.4621	34.6177	1.07236	0.002
Lrp8	chr4:107474863-107549445	leanveh	dbveh	OK	4.63871	1.14269	-2.02129	0.002
Ostf1	chr19:18654853-18706303	leanveh	dbveh	OK	38.9109	81.4926	1.06649	0.002
Osbpl6	chr2:76244594-76438704	leanveh	dbveh	OK	3.30785	0.902146	-1.87446	0.002
Large	chr8:75338497-75876455	leanveh	dbveh	OK	6.05581	16.2519	1.42421	0.002
Smoc1	chr12:82127794-82287401	leanveh	dbveh	OK	93.5029	41.5599	-1.16982	0.00205
Tcea2	chr2:181415014-181422756	leanveh	dbveh	OK	31.393	3.88438	-3.01469	0.00205
Hsd17b7	chr1:171879667-171899336	leanveh	dbveh	OK	3.29464	9.54652	1.53485	0.00205
Tifa	chr3:127492830-127501307	leanveh	dbveh	OK	4.42923	16.3691	1.88585	0.00205
Pdgfra	chr5:75548315-75594229	leanveh	dbveh	OK	11.6371	26.4456	1.18429	0.00205
Nlrp6	chr7:148106800-148114439	leanveh	dbveh	OK	4.90815	0.963518	-2.34879	0.00205
Stk39	chr2:68048503-68310038	leanveh	dbveh	OK	18.4123	6.81324	-1.43426	0.00205
Sec24d	chr3:122970413-123068554	leanveh	dbveh	OK	21.7949	48.3555	1.14969	0.00205
Adamts5	chr16:85858401-85901370	leanveh	dbveh	OK	22.8723	54.9579	1.26472	0.00205
Ap2a2	chr7:148748078-148818910	leanveh	dbveh	OK	39.2901	86.3449	1.13595	0.00205
Txnrd3	chr6:89593981-89625523	leanveh	dbveh	OK	30.3338	8.81887	-1.78226	0.0021
Btk	chrX:131076879-131117679	leanveh	dbveh	OK	1.34406	9.2411	2.78146	0.0021
Rasgrf1	chr9:89804612-89921817	leanveh	dbveh	OK	2.14003	0.359462	-2.57372	0.0021
Rab3ip	chr10:116342839-116387436	leanveh	dbveh	OK	15.793	5.27811	-1.58119	0.0021
Ccdc116	chr16:17139156-17144516	leanveh	dbveh	OK	4.20623	0.10709	-5.29563	0.00215
Pqlc3	chr12:16995453-17006924	leanveh	dbveh	OK	10.7598	34.776	1.69244	0.00215
Gmfb	chr14:47427823-47441917	leanveh	dbveh	OK	30.4114	63.9859	1.07314	0.00215
Tlr6	chr5:65344333-65351273	leanveh	dbveh	OK	0.717421	4.4117	2.62044	0.00215
Fam38a	chr8:125000042-125075229	leanveh	dbveh	OK	11.1412	27.5781	1.30762	0.00215
Cldn23	chr8:36887762-36889613	leanveh	dbveh	OK	8.7293	0.916089	-3.25231	0.00215
Emilin1	chr5:31216158-31223646	leanveh	dbveh	OK	10.9299	27.4638	1.32926	0.0022
Ly6e	chr15:74785480-74790335	leanveh	dbveh	OK	495.555	158.728	-1.64249	0.0022
Grk4	chr5:35003027-35097952	leanveh	dbveh	OK	6.49707	1.25306	-2.37433	0.0022
Serpina3m	chr12:105625373-105632467	leanveh	dbveh	OK	3.2112	25.6	2.99496	0.0022
Amt	chr9:108199252-108203928	leanveh	dbveh	OK	12.7444	2.12633	-2.58343	0.0022
Ramp3	chr11:6550150-6577478	leanveh	dbveh	OK	51.532	0.892587	-5.85133	0.0022
Vtn	chr11:78312621-78315827	leanveh	dbveh	OK	15.9218	45.1108	1.50247	0.00225
Acr	chr15:89398756-89405016	leanveh	dbveh	OK	13.7551	1.09798	-3.64705	0.00225
Stard6	chr18:70632198-70660717	leanveh	dbveh	OK	4.95166	0.681383	-2.86137	0.00225
Prcp	chr7:100023762-100083091	leanveh	dbveh	OK	13.8586	35.1254	1.34173	0.00225
Lrrc51	chr7:109061502-109082371	leanveh	dbveh	OK	36.8198	5.74516	-2.68006	0.00225
AK129341	chr9:8076632-8134294	leanveh	dbveh	OK	8.91338	1.18748	-2.90807	0.00225
Lrp1	chr10:126975213-127058204	leanveh	dbveh	OK	27.2641	69.3268	1.34641	0.00225
2310067B10Rik	chr11:115626746-115660347	leanveh	dbveh	OK	16.9895	7.76189	-1.13016	0.00225
Osbpl7	chr11:96912133-96930218	leanveh	dbveh	OK	11.8238	3.99951	-1.5638	0.00225
Fblim1	chr4:141131976-141161967	leanveh	dbveh	OK	12.554	31.522	1.32822	0.0023
Rnf150	chr8:85387254-85615170	leanveh	dbveh	OK	2.94571	6.88357	1.22454	0.0023
Ccdc38	chr10:93003376-93052403	leanveh	dbveh	OK	13.3236	0.106481	-6.96725	0.0023
Msn	chrX:93291383-93363892	leanveh	dbveh	OK	74.8454	180.525	1.27021	0.0023
Fcgr4	chr1:172949056-172959892	leanveh	dbveh	OK	2.14522	12.9928	2.59852	0.0023
Gpr88	chr3:115952571-115956402	leanveh	dbveh	OK	1.456	0.196431	-2.88992	0.0023
Phkg2	chr7:134716861-134732109	leanveh	dbveh	OK	88.704	22.5424	-1.97636	0.00235
Dtx4	chr19:12540825-12576486	leanveh	dbveh	OK	10.7772	24.5296	1.18654	0.00235
Col18a1	chr10:76514923-76629275	leanveh	dbveh	OK	34.0315	73.7324	1.11543	0.00235
Mtap2	chr1:66221902-66489157	leanveh	dbveh	OK	1.62721	0.163505	-3.315	0.00235
1110012J17Rik	chr17:66686321-66799090	leanveh	dbveh	OK	2.27712	0.353664	-2.68676	0.00235
Spp1	chr5:104864129-104870072	leanveh	dbveh	OK	38.8786	1322.67	5.08833	0.0024
Slc16a7	chr10:124664540-124765591	leanveh	dbveh	OK	25.1285	7.76181	-1.69486	0.0024
Atp6v1c1	chr15:38591658-38622199	leanveh	dbveh	OK	38.8841	78.5323	1.01411	0.0024
Slc9a4	chr1:40637071-40687576	leanveh	dbveh	OK	0.386476	2.0664	2.41867	0.0024
Pnma1	chr12:85487080-85489439	leanveh	dbveh	OK	2.66901	0.377316	-2.82246	0.0024
Myh10	chr11:68505416-68630126	leanveh	dbveh	OK	9.3381	3.91372	-1.25459	0.0024
Elovl4	chr9:83672298-83699912	leanveh	dbveh	OK	0.123647	0.716879	2.53551	0.0024
Cmtm8	chr9:114698462-114753270	leanveh	dbveh	OK	11.1489	2.22618	-2.32426	0.0024
Trim25	chr11:88860716-88881607	leanveh	dbveh	OK	16.4252	36.1251	1.13709	0.00245
Ribc1	chrX:148439126-148450838	leanveh	dbveh	OK	3.84938	0.538929	-2.83646	0.00245
Fam189a2	chr19:24047239-24105509	leanveh	dbveh	OK	25.0744	7.82119	-1.68076	0.00245
Fgd4	chr16:16422070-16560289	leanveh	dbveh	OK	2.28513	7.7823	1.76792	0.00245
Gnptab	chr10:87842156-87910074	leanveh	dbveh	OK	15.0083	32.6645	1.12197	0.00245
Map4k4	chr1:39957757-40083155	leanveh	dbveh	OK	33.1709	69.8486	1.07431	0.00245
Aldh3b1	chr19:3913490-3929716	leanveh	dbveh	OK	8.49884	24.8695	1.54904	0.00245
Lama2	chr10:26701091-27336748	leanveh	dbveh	OK	4.65477	10.679	1.19799	0.0025
Adap2	chr11:79967663-79992329	leanveh	dbveh	OK	34.8169	75.7437	1.12134	0.0025
Ovol1	chr19:5549136-5560575	leanveh	dbveh	OK	2.78635	0.300267	-3.21406	0.0025
Pgap2	chr7:109371587-109386265	leanveh	dbveh	OK	73.9105	23.3782	-1.66062	0.0025
Slc16a11	chr11:70027411-70029916	leanveh	dbveh	OK	14.0091	2.15995	-2.69729	0.0025
Ankrd33b	chr15:31221234-31297514	leanveh	dbveh	OK	1.34682	6.99192	2.37613	0.00255
Grb2	chr11:115505457-115569911	leanveh	dbveh	OK	35.1025	73.0768	1.05784	0.00255
Arpc2	chr1:74283123-74314787	leanveh	dbveh	OK	141.887	348.061	1.2946	0.00255
Il22ra2	chr10:19341833-19354487	leanveh	dbveh	OK	2.13317	0.376029	-2.50408	0.00255
B9d1	chr11:61318673-61326429	leanveh	dbveh	OK	28.4616	4.33427	-2.71516	0.00255
Cda	chr4:137894442-137923870	leanveh	dbveh	OK	15.4338	2.83209	-2.44616	0.00255
Rragc	chr4:123594675-123614240	leanveh	dbveh	OK	65.1394	138.776	1.09115	0.00255
Slc9a2	chr1:40738556-40825730	leanveh	dbveh	OK	1.81791	0.253015	-2.84499	0.0026
Fosl2	chr5:32438844-32460212	leanveh	dbveh	OK	10.8704	23.503	1.11244	0.0026
Ctsa	chr2:164656229-164683208	leanveh	dbveh	OK	51.2725	191.456	1.90075	0.00265
BC030307	chr10:86168555-86239588	leanveh	dbveh	OK	3.74388	0.392331	-3.25439	0.00265
Gba	chr3:89006849-89012603	leanveh	dbveh	OK	30.1418	67.7792	1.16908	0.00265
Pkm2	chr9:59504414-59527182	leanveh	dbveh	OK	198.718	503.827	1.34221	0.00265
Ppp4r4	chr12:104770774-104852042	leanveh	dbveh	OK	5.4152	0.886983	-2.61004	0.00265
Pde2a	chr7:108570204-108661343	leanveh	dbveh	OK	38.873	94.3915	1.27989	0.00265
Sgcb	chr5:74023987-74038970	leanveh	dbveh	OK	11.0324	23.8938	1.11489	0.00265
Stk24	chr14:121685562-121778452	leanveh	dbveh	OK	20.5602	42.7848	1.05724	0.00265
Lrrc25	chr8:73140742-73144749	leanveh	dbveh	OK	4.04564	29.1457	2.84884	0.0027
Lrrc50	chr8:122099134-122129140	leanveh	dbveh	OK	35.6037	0.131668	-8.07898	0.0027
Tank	chr2:61416642-61492226	leanveh	dbveh	OK	19.933	49.3261	1.30719	0.0027
BC051019	chr7:116847250-116867285	leanveh	dbveh	OK	2.40714	0.0323175	-6.21886	0.0027
Gsto1	chr19:47929478-47939278	leanveh	dbveh	OK	65.5641	147.412	1.16888	0.0027
Cdk18	chr1:134010123-134036262	leanveh	dbveh	OK	4.15298	17.3522	2.0629	0.00275
Lyar	chr5:38611720-38625545	leanveh	dbveh	OK	79.7268	19.8885	-2.00313	0.00275
Ccdc7	chr8:131503918-131589392	leanveh	dbveh	OK	1.17547	0	#NAME?	0.00275
Tssk4	chr14:56269018-56271369	leanveh	dbveh	OK	8.10545	0.388816	-4.38173	0.0028
Thy1	chr9:43851466-43856662	leanveh	dbveh	OK	13.5867	33.8049	1.31503	0.0028
Taok3	chr5:117570137-117725107	leanveh	dbveh	OK	7.15849	18.1594	1.34299	0.0028
Arhgap9	chr10:126760782-126778635	leanveh	dbveh	OK	5.88993	29.8852	2.34311	0.0028
Actn1	chr12:81268528-81361358	leanveh	dbveh	OK	18.5871	40.1091	1.10963	0.0028
Mtap6	chr7:106415956-106485647	leanveh	dbveh	OK	6.54668	21.374	1.70702	0.0028
2810474O19Rik	chr6:149257935-149284185	leanveh	dbveh	OK	9.31487	20.6923	1.15149	0.00285
Edem1	chr6:108778634-108809350	leanveh	dbveh	OK	20.5594	44.1604	1.10295	0.00285
C2cd2	chr16:98076815-98144243	leanveh	dbveh	OK	7.09852	15.6426	1.13989	0.00285
Rnase4	chr14:51710751-51725826	leanveh	dbveh	OK	92.3997	208.415	1.1735	0.00285
Jakmip1	chr5:37442095-37516537	leanveh	dbveh	OK	2.39238	0.389782	-2.61771	0.00285
Epb4.1l4a	chr18:33955980-34166860	leanveh	dbveh	OK	2.27049	0.391968	-2.5342	0.00285
Snx10	chr6:51473901-51540669	leanveh	dbveh	OK	24.2035	54.6592	1.17525	0.00285
Pex6	chr17:46848411-46862490	leanveh	dbveh	OK	29.5488	13.5134	-1.12871	0.00285
Ift122	chr6:115803545-115876717	leanveh	dbveh	OK	13.3409	2.49073	-2.42121	0.0029
Sgsm2	chr11:74662765-74710582	leanveh	dbveh	OK	10.7208	4.09606	-1.3881	0.0029
Rab11fip1	chr8:28249244-28285118	leanveh	dbveh	OK	7.09726	1.81276	-1.96908	0.0029
Il10ra	chr9:45061921-45077229	leanveh	dbveh	OK	5.33919	16.531	1.63048	0.00295
Tpcn2	chr7:152439827-152469832	leanveh	dbveh	OK	1.68262	12.1816	2.85593	0.00295
Mboat1	chr13:30228358-30338563	leanveh	dbveh	OK	7.86059	1.18206	-2.73333	0.00295
Wif1	chr10:120471059-120537698	leanveh	dbveh	OK	0.326967	2.47543	2.92047	0.00295
Elmo2	chr2:165113530-165151979	leanveh	dbveh	OK	10.032	21.933	1.12849	0.003
Mef2d	chr3:87946316-87973089	leanveh	dbveh	OK	19.9459	44.3837	1.15394	0.003
Tmem182	chr1:40862445-40912112	leanveh	dbveh	OK	36.146	97.4032	1.43013	0.003
Hspb1	chr5:136363788-136365433	leanveh	dbveh	OK	90.3406	196.29	1.11954	0.00305
Cacna1h	chr17:25507497-25570728	leanveh	dbveh	OK	6.27623	0.120045	-5.70825	0.00305
Fcgr1	chr3:96086831-96097892	leanveh	dbveh	OK	1.64489	10.9123	2.72989	0.00305
Mfsd7c	chr12:87087488-87154535	leanveh	dbveh	OK	3.54883	0.649432	-2.45009	0.00305
Mobkl2a	chr10:80147997-80164565	leanveh	dbveh	OK	11.7951	27.883	1.2412	0.00305
Gng4	chr13:13876805-13920162	leanveh	dbveh	OK	1.46784	0.238558	-2.62129	0.00305
Apoa1	chr9:46036712-46038549	leanveh	dbveh	OK	28.8524	125.654	2.12269	0.0031
Asgr1	chr11:69867870-69871396	leanveh	dbveh	OK	3.42991	16.2088	2.24053	0.0031
Cabyr	chr18:12899863-12913651	leanveh	dbveh	OK	18.6688	0.850763	-4.45573	0.0031
Irak2	chr6:113588460-113645020	leanveh	dbveh	OK	22.6012	50.1284	1.14923	0.0031
Nov	chr15:54577482-54585316	leanveh	dbveh	OK	10.8919	3.06435	-1.8296	0.0031
Otop1	chr5:38668642-38695456	leanveh	dbveh	OK	0.532549	2.88742	2.4388	0.0031
Gbp4	chr5:105544785-105568571	leanveh	dbveh	OK	12.3073	5.05214	-1.28455	0.00315
Slpi	chr2:164179805-164182243	leanveh	dbveh	OK	4.35949	23.7832	2.44771	0.00315
Ticam2	chr18:46717884-46734187	leanveh	dbveh	OK	1.03715	5.9867	2.52914	0.00315
Tmem120b	chr5:123526283-123567454	leanveh	dbveh	OK	62.6391	135.471	1.11285	0.00315
Wipf3	chr6:54402876-54453762	leanveh	dbveh	OK	9.61034	2.51846	-1.93205	0.00315
2610029I01Rik	chr4:21684528-21694358	leanveh	dbveh	OK	4.72492	15.7849	1.74019	0.00315
Ptgs1	chr2:36085945-36107789	leanveh	dbveh	OK	20.8018	6.64558	-1.64624	0.00315
Prlr	chr15:10106992-10266775	leanveh	dbveh	OK	6.95618	2.47321	-1.49191	0.0032
Arxes1	chrX:132567905-132569485	leanveh	dbveh	OK	14.8641	36.091	1.27981	0.0032
1700048O20Rik	chr9:121846392-121856134	leanveh	dbveh	OK	2.27646	0.384614	-2.56531	0.0032
C030037D09Rik	chr11:88579956-88589886	leanveh	dbveh	OK	2.14184	0.40976	-2.386	0.0032
Mthfd1l	chr10:6179459-6373466	leanveh	dbveh	OK	10.3291	2.39429	-2.10904	0.0032
Bri3bp	chr5:125921937-125941255	leanveh	dbveh	OK	8.40928	2.46331	-1.77138	0.0032
Prps2	chrX:163784264-163820631	leanveh	dbveh	OK	30.0433	11.4271	-1.39459	0.0032
Bhlhb9	chrX:132420389-132425620	leanveh	dbveh	OK	16.0968	4.62098	-1.8005	0.0032
Prrg1	chrX:75694951-75829235	leanveh	dbveh	OK	8.99628	2.22502	-2.01551	0.0032
Epha1	chr6:42308485-42323267	leanveh	dbveh	OK	3.4337	0.736526	-2.22096	0.00325
Rps6ka3	chrX:155694051-155801417	leanveh	dbveh	OK	25.5403	57.8222	1.17884	0.00325
Rbm20	chr19:53751795-53941570	leanveh	dbveh	OK	1.05867	0.205771	-2.36314	0.00325
Mthfd2	chr6:83255697-83267598	leanveh	dbveh	OK	25.5686	8.22918	-1.63555	0.00325
Mal	chr2:127458961-127482431	leanveh	dbveh	OK	12.524	1.12354	-3.47857	0.00325
Gm221	chr10:5785429-5836669	leanveh	dbveh	OK	1.77738	0.279956	-2.66648	0.00325
Ldlr	chr9:21528037-21554362	leanveh	dbveh	OK	10.4809	25.3485	1.27413	0.0033
Clic1	chr17:35187187-35195664	leanveh	dbveh	OK	111.577	242.725	1.12129	0.0033
Tln1	chr4:43544384-43575455	leanveh	dbveh	OK	23.3891	51.8941	1.14973	0.0033
Bag3	chr7:135667096-135690493	leanveh	dbveh	OK	33.567	66.7722	0.992204	0.0033
Cpe	chr8:67071348-67171837	leanveh	dbveh	OK	71.2216	33.2675	-1.0982	0.00335
Slc41a2	chr10:82693883-82800562	leanveh	dbveh	OK	4.0842	11.8451	1.53616	0.00335
1700009P17Rik	chr1:173051791-173057098	leanveh	dbveh	OK	30.247	4.29312	-2.8167	0.00335
2022-03-01	chr8:68141938-68995536	leanveh	dbveh	OK	2.39534	11.2355	2.22976	0.0034
Phf19	chr2:34749274-34769496	leanveh	dbveh	OK	7.8524	2.01221	-1.96435	0.0034
Angpt4	chr2:151737067-151770390	leanveh	dbveh	OK	3.00544	0.436785	-2.78258	0.0034
Apoc3	chr9:46041133-46043380	leanveh	dbveh	OK	22.8671	141.121	2.62559	0.00345
Rgs18	chr1:146599970-146622551	leanveh	dbveh	OK	1.27162	7.18647	2.49862	0.00345
Glrx	chr13:75977333-75987599	leanveh	dbveh	OK	8.01021	28.0287	1.807	0.00345
Myo9b	chr8:73796612-73884611	leanveh	dbveh	OK	11.7836	24.4995	1.05598	0.00345
Dbp	chr7:52960616-52973372	leanveh	dbveh	OK	98.493	27.7489	-1.82759	0.00345
Bex1	chrX:132748510-132750052	leanveh	dbveh	OK	11.2677	2.32109	-2.27931	0.00345
Igf1r	chr7:75097142-75378553	leanveh	dbveh	OK	7.41736	3.34527	-1.14878	0.00345
Trim67	chr8:127316918-127358604	leanveh	dbveh	OK	3.06699	7.53147	1.29611	0.00355
Sugp2	chr8:72744091-72787004	leanveh	dbveh	OK	21.8118	7.39001	-1.56146	0.00355
Rprml	chr11:103510822-103511894	leanveh	dbveh	OK	24.7423	7.91252	-1.64477	0.00355
Tmem88b	chr4:155155699-155159983	leanveh	dbveh	OK	6.68997	2.03487	-1.71706	0.00355
9430023L20Rik	chr15:101114731-101121365	leanveh	dbveh	OK	25.9457	57.9716	1.15985	0.00355
Fam46c	chr3:100275458-100293115	leanveh	dbveh	OK	22.7566	2.95584	-2.94465	0.0036
Rgs10	chr7:135517138-135561686	leanveh	dbveh	OK	14.1467	52.2145	1.88399	0.0036
BC005537	chr13:24893525-24904768	leanveh	dbveh	OK	77.7544	168.633	1.11689	0.0036
3930402G23Rik	chr8:10924426-10928457	leanveh	dbveh	OK	0.131464	0.851891	2.696	0.0036
Myoc	chr1:164569280-164588350	leanveh	dbveh	OK	0.618723	5.3794	3.12008	0.0036
Akap13	chr7:82600419-82899495	leanveh	dbveh	OK	11.547	23.6114	1.03196	0.0036
Akirin1	chr4:123412437-123427542	leanveh	dbveh	OK	24.2289	50.2887	1.05351	0.00365
Ston2	chr12:92871448-93024876	leanveh	dbveh	OK	3.47845	0.486881	-2.83681	0.00365
1700007G11Rik	chr5:98758322-99231038	leanveh	dbveh	OK	11.1111	0.190677	-5.86473	0.0037
Aph1c	chr9:66662800-66682513	leanveh	dbveh	OK	1.40504	4.73948	1.75412	0.0037
Daam2	chr17:49595346-49703662	leanveh	dbveh	OK	10.8825	4.00295	-1.44288	0.0037
Ptpdc1	chr13:48673240-48720942	leanveh	dbveh	OK	12.086	4.55119	-1.40902	0.0037
Lrrfip1	chr1:92895303-93025521	leanveh	dbveh	OK	15.3997	36.6462	1.25076	0.0037
Klf6	chr13:5860734-5869639	leanveh	dbveh	OK	44.3184	92.9552	1.06863	0.0037
Prosapip1	chr2:130458574-130468539	leanveh	dbveh	OK	9.73885	2.59386	-1.90865	0.0037
Retn	chr8:3655769-3659818	leanveh	dbveh	OK	2087	705.373	-1.56497	0.00375
Slc22a5	chr11:53678043-53705205	leanveh	dbveh	OK	24.133	10.0628	-1.26197	0.00375
Apln	chrX:45378322-45388029	leanveh	dbveh	OK	9.14304	2.70038	-1.75951	0.00375
Arl6ip5	chr6:97160785-97183309	leanveh	dbveh	OK	72.8624	148.96	1.03168	0.00375
Aqp11	chr7:104874888-104886757	leanveh	dbveh	OK	37.5987	4.75603	-2.98285	0.0038
Slc10a1	chr12:82054171-82069066	leanveh	dbveh	OK	0.602237	14.672	4.60659	0.0038
Mme	chr3:63099793-63186153	leanveh	dbveh	OK	30.1448	11.4677	-1.39434	0.0038
Dock10	chr1:80497647-80755128	leanveh	dbveh	OK	2.87861	7.10967	1.30441	0.0038
Plekha8	chr6:54545104-54595816	leanveh	dbveh	OK	8.01451	3.11733	-1.36231	0.0038
Gm5148	chr3:37613111-37623282	leanveh	dbveh	OK	1.88612	0.365569	-2.3672	0.0038
Vhl	chr6:113574014-113581627	leanveh	dbveh	OK	22.3791	46.9702	1.06959	0.00385
Galntl2	chr14:32842288-32871512	leanveh	dbveh	OK	17.7027	40.787	1.20414	0.00385
Abi1	chr2:22751041-22895760	leanveh	dbveh	OK	23.1638	48.7991	1.07498	0.0039
Gstt1	chr10:75246557-75261329	leanveh	dbveh	OK	78.7317	31.9396	-1.3016	0.0039
Hook2	chr8:87514493-87527263	leanveh	dbveh	OK	15.2198	4.57379	-1.73449	0.0039
D11Wsu47e	chr11:113545725-113555961	leanveh	dbveh	OK	16.3183	4.68396	-1.80069	0.00395
Prss23	chr7:96656294-96666096	leanveh	dbveh	OK	28.1467	61.1035	1.11829	0.00395
Mtap1a	chr2:121115337-121176749	leanveh	dbveh	OK	1.87611	7.92727	2.07908	0.00395
Slc14a2	chr18:78342882-78793689	leanveh	dbveh	OK	4.64832	0.0499371	-6.54045	0.00395
Ccng1	chr11:40562053-40568788	leanveh	dbveh	OK	34.2233	67.6762	0.983671	0.00395
Uox	chr3:146244336-146294447	leanveh	dbveh	OK	4.5297	26.1767	2.53079	0.004
4932412D23Rik	chr16:42725814-42875875	leanveh	dbveh	OK	2.03114	0	#NAME?	0.00405
Rab11fip5	chr6:85284955-85324628	leanveh	dbveh	OK	20.1114	46.9957	1.22451	0.00405
Nasp	chr4:116273656-116300556	leanveh	dbveh	OK	30.5188	8.41139	-1.85928	0.00405
Ahi1	chr10:20672352-20800235	leanveh	dbveh	OK	7.97072	2.15787	-1.8851	0.00405
Htatip2	chr7:57014475-57029369	leanveh	dbveh	OK	28.5383	71.0507	1.31595	0.00405
Samd10	chr2:181329923-181333852	leanveh	dbveh	OK	12.242	1.86584	-2.71395	0.00405
Kng1	chr16:23058372-23082151	leanveh	dbveh	OK	2.58041	33.8762	3.7146	0.0041
Arhgap11a	chr2:113671649-113688818	leanveh	dbveh	OK	3.43379	9.29898	1.43727	0.0041
Papolb	chr5:142960794-143027031	leanveh	dbveh	OK	24.4495	0.0803955	-8.24848	0.0041
Dnajb2	chr1:75232997-75242267	leanveh	dbveh	OK	37.6389	16.2083	-1.21549	0.0041
Ccdc120	chrX:7308839-7318450	leanveh	dbveh	OK	3.20825	0.581697	-2.46345	0.0041
B4galnt1	chr10:126602280-126609386	leanveh	dbveh	OK	10.9794	31.6674	1.5282	0.00415
Prdm8	chr5:98609887-98616467	leanveh	dbveh	OK	1.49799	0.273441	-2.45373	0.00415
Bmp1	chr14:70874361-70920067	leanveh	dbveh	OK	17.3217	36.8673	1.08976	0.00415
Eif2c2	chr15:72932054-73015377	leanveh	dbveh	OK	4.83762	10.0717	1.05794	0.00415
Plekhm3	chr1:64835694-65003398	leanveh	dbveh	OK	2.87119	7.28748	1.34377	0.00415
Bcl7a	chr5:123794456-123824092	leanveh	dbveh	OK	12.0776	4.34451	-1.47507	0.00415
Fhl1	chrX:53984963-54046523	leanveh	dbveh	OK	130.376	310.471	1.25178	0.0042
Phyhipl	chr10:69903415-70062039	leanveh	dbveh	OK	9.09969	0.176679	-5.68661	0.0042
Diap1	chr18:38004478-38095065	leanveh	dbveh	OK	10.8501	23.9697	1.14351	0.0042
Gabra3	chrX:69678014-69901585	leanveh	dbveh	OK	1.7678	5.51709	1.64195	0.00425
Rbm4b	chr19:4756524-4765940	leanveh	dbveh	OK	13.867	3.98945	-1.79739	0.00425
Sh3bgrl	chrX:106290745-106357806	leanveh	dbveh	OK	111.989	244.619	1.12717	0.00425
Acat2	chr17:13135907-13153591	leanveh	dbveh	OK	35.6925	15.3919	-1.21345	0.00425
Slc16a13	chr11:70030293-70034496	leanveh	dbveh	OK	8.27786	2.48139	-1.73811	0.00425
Pcna	chr2:132075021-132078916	leanveh	dbveh	OK	24.7046	55.2175	1.16035	0.0043
Cap1	chr4:122536470-122563124	leanveh	dbveh	OK	83.6594	179.745	1.10335	0.0043
Rhbdl1	chr17:25971409-25974072	leanveh	dbveh	OK	30.0347	8.40808	-1.83678	0.0043
Pitpna	chr11:75401609-75442280	leanveh	dbveh	OK	40.8452	82.6142	1.01622	0.0043
Matk	chr10:80720289-80725726	leanveh	dbveh	OK	2.27097	13.2041	2.53961	0.0043
Slc9a6	chrX:53863011-53917407	leanveh	dbveh	OK	30.5198	74.5944	1.28932	0.0043
Itgb7	chr15:102046425-102062366	leanveh	dbveh	OK	1.58911	9.39477	2.56364	0.0043
Acer2	chr4:86520317-86566785	leanveh	dbveh	OK	15.0675	32.2894	1.09963	0.00435
Ptpn7	chr1:137029301-137041897	leanveh	dbveh	OK	1.63609	11.6242	2.82881	0.00435
Spata7	chr12:99866393-99908024	leanveh	dbveh	OK	14.931	4.28237	-1.80183	0.00435
Trp53inp1	chr4:11083587-11101524	leanveh	dbveh	OK	12.9636	27.956	1.1087	0.00435
Uvrag	chr7:106035252-106289654	leanveh	dbveh	OK	11.8672	25.1384	1.08291	0.00435
Fam161b	chr12:85686266-85702771	leanveh	dbveh	OK	2.65654	0.522569	-2.34586	0.00435
Gprasp1	chrX:132277230-132338007	leanveh	dbveh	OK	11.3642	2.47041	-2.20167	0.00435
Hoxb2	chr11:96212945-96215328	leanveh	dbveh	OK	14.8769	4.47187	-1.73413	0.00435
Scube3	chr17:28279470-28308290	leanveh	dbveh	OK	1.41601	0.209798	-2.75476	0.00435
Agpat9	chr5:101275247-101328121	leanveh	dbveh	OK	41.9585	18.8933	-1.15109	0.0044
Pex5l	chr3:32848552-33042004	leanveh	dbveh	OK	1.35764	25.0501	4.20565	0.0044
Hhex	chr19:37509330-37515221	leanveh	dbveh	OK	4.5039	14.6495	1.70161	0.0044
Xk	chrX:8849909-8890371	leanveh	dbveh	OK	2.82934	0.497598	-2.50741	0.00445
Ddah1	chr3:145421655-145557241	leanveh	dbveh	OK	14.1741	4.8148	-1.55771	0.00445
Rnf149	chr1:39608143-39634192	leanveh	dbveh	OK	25.5277	54.6405	1.09791	0.0045
Armc2	chr10:41634796-41738188	leanveh	dbveh	OK	1.6619	0.207262	-3.00331	0.0045
Ift74	chr4:94281210-94359924	leanveh	dbveh	OK	19.3137	6.41159	-1.59087	0.0045
Nav2	chr7:56214442-56865458	leanveh	dbveh	OK	4.90657	1.9368	-1.34104	0.0045
Nrp2	chr1:62749890-62865266	leanveh	dbveh	OK	9.95382	23.119	1.21576	0.00455
6430531B16Rik	chr7:147158201-147164654	leanveh	dbveh	OK	4.61403	0.866054	-2.4135	0.00455
Keg1	chr19:12770279-12794386	leanveh	dbveh	OK	11.2433	2.50847	-2.16418	0.0046
Lepre1	chr4:118905519-118921582	leanveh	dbveh	OK	14.7513	31.7462	1.10574	0.0046
Rbms1	chr2:60590009-60801261	leanveh	dbveh	OK	20.7104	47.3075	1.19171	0.0046
Ptpn12	chr5:20492462-20561615	leanveh	dbveh	OK	14.8327	31.1074	1.06848	0.0046
3110082D06Rik	chr17:42452895-42644690	leanveh	dbveh	OK	0.433568	2.24988	2.37552	0.00465
Galns	chr8:125102136-125135387	leanveh	dbveh	OK	9.10973	22.9103	1.33051	0.00465
Mfsd7b	chr1:192829710-192853660	leanveh	dbveh	OK	4.14789	11.5176	1.47339	0.00465
Fndc3b	chr3:27315083-27609361	leanveh	dbveh	OK	19.5028	38.6975	0.98856	0.00465
Serping1	chr2:84605516-84615586	leanveh	dbveh	OK	125.381	269.284	1.1028	0.0047
Nek7	chr1:140381290-140516273	leanveh	dbveh	OK	27.5522	54.2343	0.97704	0.0047
Specc1	chr11:61890598-62036515	leanveh	dbveh	OK	2.81594	8.08994	1.52251	0.0047
Atg4a	chrX:137491455-137598813	leanveh	dbveh	OK	44.1157	11.9304	-1.88665	0.0047
Fmnl1	chr11:103032451-103060214	leanveh	dbveh	OK	9.2155	20.8969	1.18115	0.00475
Fam105a	chr15:27584825-27611297	leanveh	dbveh	OK	5.07818	13.8843	1.45107	0.00475
Ltbp1	chr17:75404868-75791109	leanveh	dbveh	OK	12.688	5.37316	-1.23963	0.00475
6330439K17Rik	chr2:144296292-144353134	leanveh	dbveh	OK	1.92328	0.348733	-2.46337	0.00475
F2rl1	chr13:96281683-96295195	leanveh	dbveh	OK	5.51204	1.01106	-2.44671	0.00475
4930550C14Rik	chr9:53213390-53240908	leanveh	dbveh	OK	4.90665	0.855254	-2.52031	0.0048
Arpc3	chr5:122841936-122856187	leanveh	dbveh	OK	196.291	390.013	0.990531	0.0048
Ptprs	chr17:56551848-56615903	leanveh	dbveh	OK	8.10729	16.5849	1.03258	0.00485
Arrb2	chr11:70246154-70254176	leanveh	dbveh	OK	20.7701	46.6335	1.16686	0.0049
Naip2	chr13:100914017-100972047	leanveh	dbveh	OK	1.12188	6.8222	2.60432	0.0049
Dusp10	chr1:185858339-185899515	leanveh	dbveh	OK	6.83264	19.6349	1.52291	0.0049
Pvrl3	chr16:46394970-46497080	leanveh	dbveh	OK	13.5425	4.33615	-1.64301	0.00495
Gsg2	chr11:72904096-72960951	leanveh	dbveh	OK	28.12	2.11313	-3.73414	0.005
Mns1	chr9:72286335-72339766	leanveh	dbveh	OK	22.7649	0.374168	-5.92698	0.005
Sorcs2	chr5:36359829-36740788	leanveh	dbveh	OK	5.05046	0.797922	-2.66209	0.005
Pmp22	chr11:62945011-62973048	leanveh	dbveh	OK	107.065	218.742	1.03075	0.005
Herc3	chr6:58783693-58870390	leanveh	dbveh	OK	6.43124	14.322	1.15507	0.005
Ace	chr11:105829258-105851278	leanveh	dbveh	OK	63.6957	29.5248	-1.10927	0.00505
C1qtnf6	chr15:78353775-78360081	leanveh	dbveh	OK	14.103	33.3049	1.23973	0.00505
Hck	chr2:152934203-152977177	leanveh	dbveh	OK	2.55806	16.4811	2.68769	0.00505
Fcna	chr2:25480186-25483494	leanveh	dbveh	OK	6.10588	43.0492	2.81771	0.00505
Dtna	chr18:23573915-23818215	leanveh	dbveh	OK	2.40616	0.602747	-1.99711	0.00505
Bak1	chr17:27156756-27165571	leanveh	dbveh	OK	18.9385	42.9874	1.18259	0.00505
Tspan17	chr13:54890765-54898136	leanveh	dbveh	OK	45.911	92.5933	1.01207	0.00505
Gpsm3	chr17:34726750-34728699	leanveh	dbveh	OK	12.3081	33.1149	1.42787	0.00505
Lsr	chr7:31742788-31758488	leanveh	dbveh	OK	17.6821	4.62835	-1.93372	0.00505
Fbxo24	chr5:138053732-138066306	leanveh	dbveh	OK	4.07603	0.585972	-2.79826	0.0051
Slc6a8	chrX:70918471-70927839	leanveh	dbveh	OK	22.4059	49.8763	1.15448	0.0051
Plod3	chr5:137458070-137472516	leanveh	dbveh	OK	30.1877	70.0425	1.21427	0.0051
Tctex1d4	chr4:116799417-116806557	leanveh	dbveh	OK	12.9528	0.592398	-4.45056	0.0051
Fbln1	chr15:85036437-85116724	leanveh	dbveh	OK	6.91968	17.8806	1.36961	0.00515
Dync2h1	chr9:6928502-7177046	leanveh	dbveh	OK	1.99067	0.606583	-1.71448	0.00515
Spire2	chr8:125856612-125893418	leanveh	dbveh	OK	3.68293	0.507554	-2.85922	0.00515
Ube2g2	chr10:77085065-77108735	leanveh	dbveh	OK	38.808	80.8293	1.05852	0.00515
Zcchc18	chrX:133515654-133572841	leanveh	dbveh	OK	1.31064	0.0858235	-3.93276	0.00515
Cab39	chr1:87690021-87748152	leanveh	dbveh	OK	41.8785	81.4167	0.959114	0.0052
Gyg	chr3:20021969-20054995	leanveh	dbveh	OK	38.0467	81.221	1.09408	0.0052
Srgap3	chr6:112667965-112897260	leanveh	dbveh	OK	2.65214	0.82391	-1.6866	0.0052
Hpx	chr7:112740124-112748630	leanveh	dbveh	OK	5.39367	27.1062	2.32928	0.00525
Lhfp	chr3:52845468-53065601	leanveh	dbveh	OK	16.599	36.7915	1.14828	0.00525
Tgm2	chr2:157942140-157972128	leanveh	dbveh	OK	94.79	217.684	1.19943	0.00525
Ptk2b	chr14:66772093-66899889	leanveh	dbveh	OK	13.8272	29.2909	1.08294	0.00525
1810044D09Rik	chr6:91390980-91391749	leanveh	dbveh	OK	27.1038	5.54591	-2.289	0.00525
3000002C10Rik	chr9:109732667-109733945	leanveh	dbveh	OK	3.7788	0.646945	-2.54621	0.00525
Dnase1l1	chrX:71518555-71527672	leanveh	dbveh	OK	13.0075	34.2244	1.39568	0.0053
Gpr77	chr7:16819933-16829503	leanveh	dbveh	OK	0.854773	4.6247	2.43575	0.00535
Slc48a1	chr15:97614795-97674933	leanveh	dbveh	OK	108.507	265.038	1.28841	0.00535
Snx9	chr17:5841379-5930711	leanveh	dbveh	OK	31.6868	64.0986	1.01641	0.00535
Ctf1	chr7:134856249-134861699	leanveh	dbveh	OK	9.51167	1.89352	-2.32863	0.00535
Hip1r	chr5:124423636-124453224	leanveh	dbveh	OK	13.3638	5.5873	-1.25811	0.0054
Nptn	chr9:58430046-58589366	leanveh	dbveh	OK	99.8282	201.159	1.01082	0.0054
Tppp	chr13:74146866-74173201	leanveh	dbveh	OK	8.55315	3.06576	-1.48021	0.00545
Ufm1	chr3:53657297-53667729	leanveh	dbveh	OK	12.5343	24.9524	0.993302	0.0055
Wdr35	chr12:8980806-9035653	leanveh	dbveh	OK	11.9427	4.21995	-1.50083	0.0055
Ttll5	chr12:87165899-87394710	leanveh	dbveh	OK	10.0595	3.33969	-1.59077	0.00555
Med26	chr8:75018457-75072209	leanveh	dbveh	OK	10.6187	4.20307	-1.33709	0.00555
4930528F23Rik	chr17:24941326-24976732	leanveh	dbveh	OK	4.3909	0.750628	-2.54835	0.00555
Lpgat1	chr1:193541902-193608134	leanveh	dbveh	OK	82.5685	251.535	1.60709	0.00555
Iigp1	chr18:60535682-60552283	leanveh	dbveh	OK	21.9475	9.26513	-1.24417	0.0056
Rgs16	chr1:155587482-155592598	leanveh	dbveh	OK	1.15376	6.10224	2.403	0.0056
Sox6	chr7:122614857-123182258	leanveh	dbveh	OK	4.9921	1.57151	-1.66749	0.0056
4921530L18Rik	chr2:13991959-13995561	leanveh	dbveh	OK	4.59812	0.897824	-2.35654	0.0056
Med28	chr5:45911467-45920523	leanveh	dbveh	OK	21.0795	10.1726	-1.05115	0.0056
Mertk	chr2:128524732-128627924	leanveh	dbveh	OK	16.4423	32.4219	0.979557	0.0056
Tsga14	chr6:30603456-30643682	leanveh	dbveh	OK	7.05738	2.23303	-1.66013	0.00565
Mdc1	chr17:35978442-35996615	leanveh	dbveh	OK	11.991	5.44662	-1.13852	0.00565
Ano1	chr7:151774453-151924497	leanveh	dbveh	OK	8.12091	2.45779	-1.72428	0.00565
Rasa1	chr13:85354303-85429091	leanveh	dbveh	OK	10.4372	21.3557	1.03289	0.0057
Tnfaip8l2	chr3:94938009-94946282	leanveh	dbveh	OK	5.96121	34.5648	2.53563	0.0057
Nqo1	chr8:109912124-109927105	leanveh	dbveh	OK	19.3603	5.8834	-1.71838	0.0057
Sh3bgr	chr16:96422076-96450540	leanveh	dbveh	OK	3.0985	0.514398	-2.59061	0.0057
Lss	chr10:75994371-76016679	leanveh	dbveh	OK	8.04014	19.1271	1.25033	0.00575
Spnb3	chr19:4711222-4752352	leanveh	dbveh	OK	2.00019	0.451019	-2.14888	0.00575
Pppde1	chr1:180117547-180182728	leanveh	dbveh	OK	7.87451	17.5606	1.15708	0.0058
Wipi1	chr11:109434834-109472703	leanveh	dbveh	OK	14.6966	35.731	1.2817	0.0058
Ccdc37	chr6:90353729-90378474	leanveh	dbveh	OK	2.39221	0.433305	-2.46489	0.00585
Camk1d	chr2:5214502-5635710	leanveh	dbveh	OK	1.62979	5.86786	1.84815	0.00585
Pik3cg	chr12:32858261-32893514	leanveh	dbveh	OK	1.06423	4.13528	1.95817	0.00585
Gadd45b	chr10:80392835-80394949	leanveh	dbveh	OK	11.0171	39.7227	1.85022	0.00585
Kcnb1	chr2:166928882-167014299	leanveh	dbveh	OK	4.21404	11.2572	1.41758	0.00585
B130034C11Rik	chr16:87496317-87504283	leanveh	dbveh	OK	1.01786	0.215605	-2.23907	0.00585
Rcn1	chr2:105226104-105239476	leanveh	dbveh	OK	44.1067	18.0777	-1.28679	0.0059
Mcl1	chr3:95462642-95467101	leanveh	dbveh	OK	70.5505	145.897	1.04822	0.0059
Ift172	chr5:31555651-31593487	leanveh	dbveh	OK	9.42619	4.00729	-1.23405	0.0059
Itgb1	chr8:131209553-131257479	leanveh	dbveh	OK	120.994	283.456	1.22819	0.0059
Bmp3	chr5:99283457-99309979	leanveh	dbveh	OK	4.67645	11.7805	1.33292	0.00595
Soat1	chr1:158358238-158404459	leanveh	dbveh	OK	9.4453	21.2746	1.17147	0.00595
Lrrc32	chr7:105642731-105650340	leanveh	dbveh	OK	9.66314	20.4038	1.07827	0.00595
Ddi2	chr4:141239477-141279334	leanveh	dbveh	OK	5.51769	15.7477	1.51301	0.00595
Adra1a	chr14:67254094-67352166	leanveh	dbveh	OK	2.05707	6.67837	1.6989	0.00595
Klhl2	chr8:67218658-67373716	leanveh	dbveh	OK	40.2478	19.8305	-1.02119	0.006
Upk1b	chr16:38773296-38800316	leanveh	dbveh	OK	0.866712	4.71112	2.44244	0.00605
Perp	chr10:18564876-18576878	leanveh	dbveh	OK	15.0846	3.12806	-2.26974	0.00605
Fmr1	chrX:65931729-65971136	leanveh	dbveh	OK	43.5408	90.3521	1.05319	0.00605
Oasl1	chr5:115373248-115387920	leanveh	dbveh	OK	1.724	8.92907	2.37275	0.0061
Flywch2	chr17:23913884-23923044	leanveh	dbveh	OK	16.8669	3.32948	-2.34082	0.0061
Psip1	chr4:83101584-83132294	leanveh	dbveh	OK	16.8626	6.42778	-1.39143	0.0061
Igf2	chr7:149836672-149856261	leanveh	dbveh	OK	7.88039	1.89374	-2.05703	0.0061
2310014H01Rik	chr17:36002539-36012541	leanveh	dbveh	OK	27.5503	57.5207	1.06201	0.00615
2022-09-08	chr11:53333301-53357598	leanveh	dbveh	OK	23.9558	46.4407	0.955015	0.00615
Osr2	chr15:35225866-35233060	leanveh	dbveh	OK	6.65096	1.47844	-2.16949	0.00615
Maf	chr8:118227152-118230794	leanveh	dbveh	OK	16.3486	34.5064	1.07769	0.0062
Mfap2	chr4:140566338-140571899	leanveh	dbveh	OK	6.13908	28.4615	2.21292	0.00625
Serf1	chr13:100877973-100884188	leanveh	dbveh	OK	91.5429	32.1918	-1.50776	0.00625
Rab36	chr10:74499833-74516845	leanveh	dbveh	OK	4.46058	0.870011	-2.35813	0.00625
Ptgfrn	chr3:100844158-100914089	leanveh	dbveh	OK	11.7636	23.0019	0.967422	0.0063
Abhd12	chr2:150658250-150730467	leanveh	dbveh	OK	78.9918	165.081	1.0634	0.0063
Coil	chr11:88835248-88852927	leanveh	dbveh	OK	13.9252	3.99575	-1.80116	0.0063
Rgs5	chr1:171585631-171623657	leanveh	dbveh	OK	97.6226	45.3959	-1.10465	0.0063
Kif5c	chr2:49474833-49630298	leanveh	dbveh	OK	1.64957	0.316007	-2.38406	0.0063
Ikzf4	chr10:128069470-128083049	leanveh	dbveh	OK	1.18289	0.202774	-2.54437	0.0063
Arc	chr15:74499512-74503000	leanveh	dbveh	OK	10.3366	1.62562	-2.66869	0.00635
Plxna1	chr6:89266307-89312607	leanveh	dbveh	OK	9.89631	18.7327	0.920592	0.0064
Clic5	chr17:44325520-44417117	leanveh	dbveh	OK	11.8709	4.96643	-1.25715	0.00645
Zfp574	chr7:25862223-25868511	leanveh	dbveh	OK	12.9987	5.27877	-1.30009	0.00645
I830077J02Rik	chr3:105728808-105735582	leanveh	dbveh	OK	0.302433	1.43109	2.24242	0.00645
Trp53inp2	chr2:155207591-155215583	leanveh	dbveh	OK	156.368	407.356	1.38134	0.0065
Rab3b	chr4:108551674-108644682	leanveh	dbveh	OK	1.52481	0.285009	-2.41955	0.0065
Slc23a2	chr2:131878231-131970844	leanveh	dbveh	OK	6.92846	14.5319	1.06861	0.00655
Hsd17b12	chr2:93872853-93998066	leanveh	dbveh	OK	67.0942	128.065	0.932616	0.00655
Bbx	chr16:50191956-50432502	leanveh	dbveh	OK	11.5429	5.46453	-1.07884	0.00655
Mrap	chr16:90738568-90750021	leanveh	dbveh	OK	160.516	330.286	1.041	0.00655
Tmprss6	chr15:78270096-78299064	leanveh	dbveh	OK	0.491164	2.99889	2.61015	0.0066
Phf1	chr17:27070071-27074835	leanveh	dbveh	OK	35.0639	16.9281	-1.05056	0.00665
Grhpr	chr4:44994282-45003568	leanveh	dbveh	OK	78.7181	35.5218	-1.14799	0.00665
Lekr1	chr3:65470149-65635084	leanveh	dbveh	OK	3.80589	0.73222	-2.37789	0.00665
Luc7l3	chr11:94152452-94183225	leanveh	dbveh	OK	32.7156	15.5387	-1.07411	0.0067
Ccdc46	chr11:108286579-108721929	leanveh	dbveh	OK	8.44251	1.33129	-2.66485	0.00675
4930529L06Rik	chr16:84680033-84685392	leanveh	dbveh	OK	1.14803	0	#NAME?	0.00675
Epb4.1l4b	chr4:57074597-57156028	leanveh	dbveh	OK	7.06864	1.43299	-2.30241	0.00675
Rab22a	chr2:173485345-173527683	leanveh	dbveh	OK	30.2454	59.749	0.982199	0.00675
Scml2	chrX:157600703-157696145	leanveh	dbveh	OK	1.61622	0.269243	-2.58564	0.0068
Slc7a6	chr8:108692774-108722604	leanveh	dbveh	OK	10.039	21.8209	1.12009	0.0068
Efr3b	chr12:3962553-4038915	leanveh	dbveh	OK	3.61306	9.91197	1.45595	0.00685
Prkcq	chr2:11094008-11222853	leanveh	dbveh	OK	3.73712	0.782631	-2.25553	0.00685
Alb	chr5:90889914-90905629	leanveh	dbveh	OK	56.0125	1302.46	4.53935	0.00685
Zdhhc9	chrX:45525147-45561879	leanveh	dbveh	OK	11.7416	25.8469	1.13836	0.00685
Angpt1	chr15:42256270-42508341	leanveh	dbveh	OK	6.40757	1.0377	-2.62638	0.00685
Gm11428	chr11:83517557-83519771	leanveh	dbveh	OK	19.6793	111.521	2.50257	0.0069
Dgkz	chr2:91772978-91803720	leanveh	dbveh	OK	14.4882	29.4851	1.02511	0.0069
Ift140	chr17:25153030-25236442	leanveh	dbveh	OK	19.4529	6.3476	-1.6157	0.0069
Mctp1	chr13:76522408-77171071	leanveh	dbveh	OK	0.921389	4.61737	2.32519	0.00695
Tbx3	chr5:120120677-120134610	leanveh	dbveh	OK	11.86	4.53518	-1.38687	0.00695
Ctxn1	chr8:4257645-4259274	leanveh	dbveh	OK	15.7465	3.25915	-2.27246	0.00695
Sclt1	chr3:41430626-41546436	leanveh	dbveh	OK	6.80686	2.21502	-1.61967	0.007
Arntl	chr7:120350978-120457640	leanveh	dbveh	OK	2.28254	8.92787	1.96767	0.007
Cep72	chr13:74173942-74199733	leanveh	dbveh	OK	5.3627	0.940006	-2.51222	0.007
Fgfr3	chr5:34064372-34079717	leanveh	dbveh	OK	8.53939	2.43289	-1.81146	0.007
Krba1	chr6:48345584-48369854	leanveh	dbveh	OK	5.95774	1.69959	-1.80958	0.007
2200002K05Rik	chr9:15043488-15063857	leanveh	dbveh	OK	2.19947	0.417927	-2.39583	0.007
Atp2a3	chr11:72774670-72806545	leanveh	dbveh	OK	17.266	35.382	1.03508	0.00705
Nfkbid	chr7:31208322-31213765	leanveh	dbveh	OK	1.07064	5.06293	2.2415	0.00705
Vars	chr17:35137851-35153274	leanveh	dbveh	OK	36.4212	18.7726	-0.956152	0.00705
Gprin3	chr6:59302454-59376284	leanveh	dbveh	OK	0.934365	4.38315	2.22991	0.00705
Epn2	chr11:61330750-61393153	leanveh	dbveh	OK	24.571	46.3065	0.914255	0.0071
Fibin	chr2:110201081-110203150	leanveh	dbveh	OK	4.34117	13.5547	1.64264	0.0071
Cxcl14	chr13:56390005-56397912	leanveh	dbveh	OK	10.4558	27.7944	1.41049	0.00715
Mtpn	chr6:35458823-35489888	leanveh	dbveh	OK	48.1607	98.643	1.03436	0.00715
Clock	chr5:76641201-76733573	leanveh	dbveh	OK	8.5385	16.8693	0.982347	0.00715
Rhoj	chr12:76409299-76502442	leanveh	dbveh	OK	21.7076	43.5628	1.00489	0.00715
Plscr2	chr9:92170439-92192590	leanveh	dbveh	OK	18.5774	5.78347	-1.68354	0.00715
Csf3r	chr4:125701902-125721684	leanveh	dbveh	OK	1.0737	5.27226	2.29583	0.00715
Fabp1	chr6:71149881-71155017	leanveh	dbveh	OK	28.7008	148.625	2.37251	0.0072
Cnr2	chr4:135451318-135476125	leanveh	dbveh	OK	0.96225	5.00013	2.37748	0.00725
Gcom1	chr9:71352153-71440167	leanveh	dbveh	OK	10.7589	3.61269	-1.57438	0.00725
Ptpre	chr7:142729506-142877977	leanveh	dbveh	OK	4.37892	10.282	1.23147	0.0073
Cabp1	chr5:115618699-115636130	leanveh	dbveh	OK	1.37074	0.28329	-2.27461	0.0073
Pacsin3	chr2:91096969-91104836	leanveh	dbveh	OK	26.9146	10.7502	-1.32402	0.00735
B430306N03Rik	chr17:48455486-48465836	leanveh	dbveh	OK	0.774986	3.16076	2.02803	0.00735
Ifrd1	chr12:40929715-40949776	leanveh	dbveh	OK	48.9449	96.8945	0.985256	0.00735
Ugt1a1	chr1:89951985-90116577	leanveh	dbveh	OK	0.0936067	7.52787	6.32949	0.0074
Plekha5	chr6:140372619-140543427	leanveh	dbveh	OK	9.65059	3.53869	-1.4474	0.0074
Serpina1a	chr12:105091668-105101829	leanveh	dbveh	OK	4.16362	20.5169	2.3009	0.00745
Trim36	chr18:46324953-46372261	leanveh	dbveh	OK	9.14994	2.68168	-1.77063	0.0075
Rnf138	chr18:21159841-21186724	leanveh	dbveh	OK	22.1314	9.03814	-1.292	0.0075
Hsd11b1	chr1:195047834-195090239	leanveh	dbveh	OK	96.6223	216.245	1.16224	0.0075
2210020M01Rik	chr11:115753908-115794806	leanveh	dbveh	OK	12.7431	0.489428	-4.70247	0.00755
Plp1	chrX:133357374-133372281	leanveh	dbveh	OK	3.27882	0.846685	-1.95328	0.00755
1700080N15Rik	chr2:4053110-4062187	leanveh	dbveh	OK	0.71178	0	#NAME?	0.0076
Cd47	chr16:49855766-49911796	leanveh	dbveh	OK	31.6024	60.9519	0.947635	0.0076
Itih4	chr14:31699677-31715169	leanveh	dbveh	OK	2.38682	15.4542	2.69484	0.00765
Rhoc	chr3:104591951-104597377	leanveh	dbveh	OK	145.163	273.782	0.915356	0.00765
Zfp711	chrX:109714134-109748671	leanveh	dbveh	OK	1.7005	0.296878	-2.51801	0.0077
Ube2c	chr2:164595428-164598402	leanveh	dbveh	OK	10.2172	30.166	1.56192	0.0077
Ostm1	chr10:42398721-42422268	leanveh	dbveh	OK	24.9177	48.2069	0.952067	0.0077
Impdh1	chr6:29150439-29162271	leanveh	dbveh	OK	17.6916	38.3469	1.11604	0.0077
Ntn1	chr11:68022865-68200328	leanveh	dbveh	OK	9.73717	4.13494	-1.23564	0.0077
Ahcy	chr2:154885047-154900233	leanveh	dbveh	OK	5.49027	15.5074	1.49801	0.00775
Ckap4	chr10:83989049-83996633	leanveh	dbveh	OK	20.6361	40.0819	0.957781	0.00775
Pkp2	chr16:16213437-16272805	leanveh	dbveh	OK	27.1013	52.5397	0.955045	0.00775
Got2	chr8:98388036-98412265	leanveh	dbveh	OK	68.3474	28.3757	-1.26823	0.00775
Slc44a3	chr3:121162445-121235262	leanveh	dbveh	OK	15.3856	4.54199	-1.76018	0.00775
Tuba1a	chr15:98780277-98783932	leanveh	dbveh	OK	163.811	339.595	1.05178	0.00775
Hadhb	chr5:30481861-30511123	leanveh	dbveh	OK	60.9167	121.29	0.993552	0.00775
1700065J18Rik	chr1:194667898-194668933	leanveh	dbveh	OK	0.660186	0	#NAME?	0.0078
Cyp2e1	chr7:147949730-147960876	leanveh	dbveh	OK	1495.31	317.369	-2.23621	0.0078
Abl2	chr1:158488917-158579750	leanveh	dbveh	OK	4.08717	8.31032	1.0238	0.0078
Nnt	chr13:120123123-120197945	leanveh	dbveh	OK	16.4365	6.94569	-1.24271	0.0078
Flnc	chr6:29383152-29411888	leanveh	dbveh	OK	1.99219	5.4272	1.44585	0.0079
Fhl3	chr4:124377942-124385855	leanveh	dbveh	OK	9.30608	23.3294	1.32591	0.0079
Heatr5a	chr12:52976859-53072308	leanveh	dbveh	OK	4.45134	9.60427	1.10944	0.00795
Cd37	chr7:52489001-52494209	leanveh	dbveh	OK	5.36782	31.7194	2.56296	0.008
Klk1b7-ps	chr7:51200381-51201297	leanveh	dbveh	OK	0.844162	0	#NAME?	0.00805
Ndrg1	chr15:66760879-66801203	leanveh	dbveh	OK	89.4902	44.8492	-0.996647	0.00805
Itfg3	chr17:26349636-26381187	leanveh	dbveh	OK	26.6225	52.6954	0.985032	0.00805
Tdrd6	chr17:43752283-43767248	leanveh	dbveh	OK	11.5359	0.0384171	-8.23017	0.0081
Lrrcc1	chr3:14533787-14572658	leanveh	dbveh	OK	12.7791	4.64086	-1.46132	0.0081
Aplnr	chr2:84976516-84980080	leanveh	dbveh	OK	14.6064	5.50677	-1.40732	0.0081
Cd82	chr2:93259268-93310031	leanveh	dbveh	OK	44.7463	19.5969	-1.19114	0.0081
Arhgap8	chr15:84545058-84602637	leanveh	dbveh	OK	4.61257	1.11725	-2.04562	0.00815
Itsn1	chr16:91729615-91920824	leanveh	dbveh	OK	15.3274	30.9394	1.01333	0.00815
Adra2c	chr5:35621214-35624412	leanveh	dbveh	OK	1.56096	0.259391	-2.58923	0.00815
Tpcn1	chr5:120984165-121038622	leanveh	dbveh	OK	17.8832	35.2517	0.979088	0.0082
2410001C21Rik	chr2:172266077-172295399	leanveh	dbveh	OK	63.4607	121.803	0.940612	0.0082
Fam102b	chr3:108773914-108830525	leanveh	dbveh	OK	12.6334	24.5347	0.957586	0.0082
Slc7a2	chr8:41947720-42007424	leanveh	dbveh	OK	3.36987	7.68993	1.19028	0.00825
Mocos	chr18:24812191-24860057	leanveh	dbveh	OK	6.86969	18.987	1.46669	0.0083
Runx1	chr16:92601710-92826311	leanveh	dbveh	OK	1.35959	4.2558	1.64626	0.0083
Khdrbs3	chr15:68758849-68923948	leanveh	dbveh	OK	14.3719	4.79943	-1.58232	0.0083
Gm10267	chr18:44316057-44318957	leanveh	dbveh	OK	5.55288	0	#NAME?	0.0083
Incenp	chr19:9946786-9974023	leanveh	dbveh	OK	4.48234	10.8275	1.27237	0.00835
Lars2	chr9:123276057-123371782	leanveh	dbveh	OK	296.785	116.826	-1.34506	0.00835
Ptpra	chr2:130276013-130389485	leanveh	dbveh	OK	40.3139	77.0577	0.934662	0.00835
Naip5	chr13:100981694-101017291	leanveh	dbveh	OK	1.1952	3.55239	1.57154	0.00835
Nomo1	chr7:53289065-53339582	leanveh	dbveh	OK	38.5098	71.5979	0.894693	0.00835
Fam102a	chr2:32390878-32425270	leanveh	dbveh	OK	20.1911	9.59222	-1.07378	0.0084
Clip1	chr5:124029078-124134300	leanveh	dbveh	OK	14.6951	28.585	0.959926	0.0084
Nkapl	chr13:21558915-21560370	leanveh	dbveh	OK	6.63817	1.04499	-2.6673	0.00845
A630033H20Rik	chrX:104344265-104369000	leanveh	dbveh	OK	0.679552	4.03606	2.57029	0.00845
Dtx3	chr10:126627433-126632765	leanveh	dbveh	OK	46.689	23.284	-1.00374	0.00845
Frmd4b	chr6:97236860-97567651	leanveh	dbveh	OK	6.63303	14.3058	1.10886	0.00845
Mpdz	chr4:80924403-81088709	leanveh	dbveh	OK	9.13199	17.4799	0.9367	0.00845
Hsd17b4	chr18:50287854-50355924	leanveh	dbveh	OK	102.188	204.64	1.00187	0.00845
Defb18	chr1:18226553-18227524	leanveh	dbveh	OK	1.77901	0	#NAME?	0.00845
Pde1a	chr2:79674609-79969569	leanveh	dbveh	OK	15.1316	5.45571	-1.47172	0.0085
Kctd9	chr14:68334154-68360367	leanveh	dbveh	OK	9.06597	20.7681	1.19584	0.0085
Syngr1	chr15:79921763-79949931	leanveh	dbveh	OK	7.45217	58.1964	2.9652	0.0085
Eea1	chr10:95403296-95508152	leanveh	dbveh	OK	8.1025	15.5888	0.944075	0.00855
Tctn2	chr5:125048757-125077658	leanveh	dbveh	OK	13.8014	5.32777	-1.37321	0.00855
Ano6	chr15:95621273-95805182	leanveh	dbveh	OK	29.2615	54.3437	0.893109	0.00855
Col4a1	chr8:11198422-11312826	leanveh	dbveh	OK	133.464	409.454	1.61725	0.00855
Igf2bp3	chr6:49035216-49164953	leanveh	dbveh	OK	1.66985	0.303458	-2.46015	0.0086
Vwa5a	chr9:38525852-38550922	leanveh	dbveh	OK	21.7873	43.3379	0.992145	0.0086
Hoxd8	chr2:74543545-74545364	leanveh	dbveh	OK	38.8787	17.4131	-1.15881	0.0086
Gm973	chr1:59573107-59691353	leanveh	dbveh	OK	3.88109	0.0587939	-6.04465	0.00865
Was	chrX:7658591-7667617	leanveh	dbveh	OK	2.41508	12.9718	2.42524	0.00865
Nsf	chr11:103683096-103815370	leanveh	dbveh	OK	9.69283	20.9209	1.10996	0.00865
Hmgb3	chrX:68809167-68813829	leanveh	dbveh	OK	34.5043	14.9386	-1.20773	0.00865
Lrig1	chr6:94450307-94650139	leanveh	dbveh	OK	15.6675	7.08822	-1.14428	0.00865
Cadm4	chr7:25267041-25289552	leanveh	dbveh	OK	4.71984	15.2958	1.69633	0.0087
Flrt2	chr12:96930435-97023423	leanveh	dbveh	OK	2.38394	6.14733	1.36661	0.0087
Lrrc36	chr8:107937521-107987986	leanveh	dbveh	OK	8.57395	0.908401	-3.23856	0.0087
Ergic1	chr17:26698456-26793878	leanveh	dbveh	OK	49.4404	93.3411	0.916821	0.0087
Setx	chr2:28980511-29037991	leanveh	dbveh	OK	19.7679	7.64844	-1.36992	0.0087
Tmem135	chr7:96288230-96487297	leanveh	dbveh	OK	34.4326	67.2148	0.965005	0.0087
Nln	chr13:104813518-104899694	leanveh	dbveh	OK	10.7166	21.007	0.97102	0.0087
Col16a1	chr4:129725083-129776521	leanveh	dbveh	OK	9.41446	20.3035	1.10878	0.0087
Adam11	chr11:102622752-102641576	leanveh	dbveh	OK	6.13173	1.23106	-2.31639	0.0087
Col4a6	chrX:137599945-137908619	leanveh	dbveh	OK	1.9559	0.516469	-1.92108	0.0088
2022-09-07	chr9:25060039-25116156	leanveh	dbveh	OK	61.8404	114.616	0.89018	0.0088
Atp1b2	chr11:69413251-69419462	leanveh	dbveh	OK	18.6106	6.3656	-1.54775	0.0088
Gm14420	chr2:177249446-177263899	leanveh	dbveh	OK	13.9219	30.0342	1.10925	0.0088
Glg1	chr8:113681457-113783102	leanveh	dbveh	OK	15.4355	29.2738	0.923361	0.00885
Hpse	chr5:101108504-101148702	leanveh	dbveh	OK	1.65519	8.39722	2.34291	0.00885
B230312A22Rik	chr4:43045381-43059075	leanveh	dbveh	OK	21.8919	42.2672	0.949142	0.00885
4930511M06Rik	chr18:57693479-57890719	leanveh	dbveh	OK	1.11936	0.00847837	-7.04466	0.0089
Mitf	chr6:97757051-97971352	leanveh	dbveh	OK	3.5443	10.0591	1.50493	0.0089
Slc9a9	chr9:94570310-95130871	leanveh	dbveh	OK	2.73309	8.72349	1.67437	0.0089
Mpp3	chr11:101860966-101888269	leanveh	dbveh	OK	2.99038	0.665602	-2.1676	0.0089
Ccdc18	chr5:108561932-108661968	leanveh	dbveh	OK	1.12469	0.242043	-2.2162	0.0089
Defb10	chr8:22969372-22972482	leanveh	dbveh	OK	3.4566	0	#NAME?	0.0089
Znhit2-ps	chr19:6061206-6062468	leanveh	dbveh	OK	51.9607	24.2803	-1.09763	0.00895
Cyfip1	chr7:63097440-63217820	leanveh	dbveh	OK	17.9813	38.0616	1.08184	0.00895
Izumo4	chr10:80165437-80168127	leanveh	dbveh	OK	28.7973	9.71583	-1.56753	0.009
Ccdc109b	chr3:129617877-129673124	leanveh	dbveh	OK	3.02157	14.5345	2.26611	0.00905
Cpeb4	chr11:31772210-31831577	leanveh	dbveh	OK	11.3264	25.8371	1.18976	0.00905
Lrrc56	chr7:148380028-148399979	leanveh	dbveh	OK	13.3527	3.21622	-2.0537	0.00905
Eif4a1	chr11:69480437-69485925	leanveh	dbveh	OK	51.6323	97.2852	0.913945	0.00905
Fam169a	chr13:97837241-97907881	leanveh	dbveh	OK	4.9437	0.142452	-5.11704	0.0091
Tnc	chr4:63620818-63708049	leanveh	dbveh	OK	3.35046	7.77781	1.21501	0.00915
Ywhah	chr5:33361464-33370615	leanveh	dbveh	OK	58.0378	108.312	0.900126	0.00915
Ric3	chr7:116154393-116226838	leanveh	dbveh	OK	4.8197	11.3491	1.23557	0.00915
Zfp318	chr17:46520714-46557867	leanveh	dbveh	OK	12.9744	5.63911	-1.20213	0.00915
Mrgpre	chr7:150964267-150970405	leanveh	dbveh	OK	0.881899	3.94059	2.15972	0.00915
Fnip1	chr11:54251680-54331743	leanveh	dbveh	OK	9.76192	18.4615	0.91928	0.0092
Podxl	chr6:31469492-31513937	leanveh	dbveh	OK	25.4543	11.9016	-1.09675	0.0092
Nr6a1	chr2:38578893-38781981	leanveh	dbveh	OK	3.82401	0.664822	-2.52405	0.00925
Antxr1	chr6:87083846-87285769	leanveh	dbveh	OK	4.58301	10.545	1.20219	0.00925
Cltb	chr13:54694299-54712633	leanveh	dbveh	OK	44.5801	84.9595	0.930374	0.00925
Lyn	chr4:3605267-3718759	leanveh	dbveh	OK	15.7736	32.6152	1.04804	0.00925
Evpl	chr11:116081872-116099405	leanveh	dbveh	OK	1.82062	0.428655	-2.08654	0.00925
Sh3bp1	chr15:78730215-78742482	leanveh	dbveh	OK	4.26159	12.3703	1.53742	0.0093
AI428936	chr7:31099834-31104064	leanveh	dbveh	OK	1.96126	0.443022	-2.14633	0.0093
Adcy7	chr8:90796301-90853861	leanveh	dbveh	OK	11.8783	26.3219	1.14793	0.00935
H2-Ab1	chr17:34400171-34406363	leanveh	dbveh	OK	288.733	154.567	-0.901505	0.00935
Itgb3	chr11:104469313-104531785	leanveh	dbveh	OK	1.49416	4.34565	1.54024	0.0094
0610011F06Rik	chr17:26012444-26014108	leanveh	dbveh	OK	42.0094	14.0393	-1.58124	0.0094
Reep1	chr6:71657674-71760699	leanveh	dbveh	OK	10.0357	3.04269	-1.72172	0.00945
Hspb6	chr7:31338320-31340458	leanveh	dbveh	OK	17.647	38.8801	1.13961	0.00945
Myb	chr10:20844735-20880790	leanveh	dbveh	OK	2.63057	0.101716	-4.69276	0.00945
Xylt1	chr7:124524492-124811144	leanveh	dbveh	OK	1.00286	4.53488	2.17694	0.0095
Gm6377	chrX:106392094-106395784	leanveh	dbveh	OK	0.312221	1.79458	2.523	0.0095
Rogdi	chr16:5008821-5013646	leanveh	dbveh	OK	28.2816	8.75845	-1.69111	0.00955
Atp11a	chr8:12757015-12868728	leanveh	dbveh	OK	38.8875	18.9644	-1.03601	0.00955
Aprt	chr8:125098536-125100807	leanveh	dbveh	OK	23.8016	60.0214	1.33442	0.0096
AI662270	chr11:83037077-83040086	leanveh	dbveh	OK	4.65893	27.4183	2.55707	0.00965
Aldh1a2	chr9:71063595-71144050	leanveh	dbveh	OK	13.5657	4.47309	-1.60062	0.00965
Man2b2	chr5:37198051-37221888	leanveh	dbveh	OK	17.0853	32.2137	0.914922	0.00965
Racgap1	chr15:99450926-99482052	leanveh	dbveh	OK	5.20041	12.4125	1.2551	0.0097
Cdk14	chr5:4803384-5380251	leanveh	dbveh	OK	5.53278	12.5937	1.18663	0.0097
1700025M24Rik	chr5:73659818-73675423	leanveh	dbveh	OK	1.28129	0	#NAME?	0.0097
Tubb2b	chr13:34218876-34222223	leanveh	dbveh	OK	1.50942	6.43059	2.09096	0.0097
Cd276	chr9:58372106-58388747	leanveh	dbveh	OK	2.05768	6.02987	1.5511	0.0097
Ap2m1	chr16:20535576-20544126	leanveh	dbveh	OK	51.4097	99.4391	0.951773	0.0097
Nhlrc3	chr3:53255917-53267180	leanveh	dbveh	OK	5.51423	16.0363	1.54011	0.00975
Camsap1	chr2:25782357-25838802	leanveh	dbveh	OK	8.00442	3.40486	-1.2332	0.00975
Aim2	chr1:175350734-175396167	leanveh	dbveh	OK	1.46276	7.17656	2.2946	0.00975
Mpi	chr9:57392074-57400559	leanveh	dbveh	OK	20.4925	8.28659	-1.30624	0.00975
Spag17	chr3:99689339-99966326	leanveh	dbveh	OK	6.34281	0.0574784	-6.78596	0.0098
Phospho2	chr2:69627793-69635225	leanveh	dbveh	OK	30.4004	12.6167	-1.26875	0.0098
Megf9	chr4:70092960-70195962	leanveh	dbveh	OK	6.66472	14.6722	1.13847	0.0098
Etl4	chr2:20211539-20732162	leanveh	dbveh	OK	13.0889	6.03008	-1.1181	0.0099
Ccdc148	chr2:58674108-58998684	leanveh	dbveh	OK	1.19664	0.0629128	-4.2495	0.0099
2310022B05Rik	chr8:127159655-127187269	leanveh	dbveh	OK	18.9609	35.6143	0.909426	0.0099
Dhh	chr15:98723457-98728971	leanveh	dbveh	OK	4.42829	1.05103	-2.07494	0.00995

## Sheet: C - dbLSD1i_vs_leanVeh
gene_id	locus	sample_1	sample_2	status	value_1	value_2	log2(fold_change)	p_value_dbLSD1i_vs_leanVeh
Spp1	chr5:104864129-104870072	leanveh	dbLSDi	OK	39.5425	218.574	2.46664	5e-05
Adam8	chr7:147164839-147178387	leanveh	dbLSDi	OK	4.04604	51.6738	3.67485	5e-05
Emr1	chr17:57498108-57622952	leanveh	dbLSDi	OK	10.1217	43.8122	2.11389	5e-05
S100a8	chr3:90472992-90473956	leanveh	dbLSDi	OK	23.3947	380.137	4.02227	5e-05
Aldob	chr4:49548866-49562355	leanveh	dbLSDi	OK	35.1813	5.86291	-2.58512	5e-05
Igfbp3	chr11:7106095-7113926	leanveh	dbLSDi	OK	15.7682	149.635	3.24636	5e-05
Pmepa1	chr2:173049965-173102034	leanveh	dbLSDi	OK	54.0285	154.449	1.51534	5e-05
Alas2	chrX:146981959-147005165	leanveh	dbLSDi	OK	26.452	108.585	2.03737	5e-05
Slc27a2	chr2:126378759-126413979	leanveh	dbLSDi	OK	25.4954	2.57871	-3.30551	5e-05
Wisp2	chr2:163646569-163658883	leanveh	dbLSDi	OK	13.2044	130.603	3.3061	5e-05
Peg3	chr7:6658670-6683130	leanveh	dbLSDi	OK	17.166	89.149	2.37666	5e-05
Slc36a2	chr11:54971969-54998579	leanveh	dbLSDi	OK	6.36587	49.8102	2.96801	5e-05
Col6a5	chr9:105758399-105862974	leanveh	dbLSDi	OK	10.4232	3.52524	-1.56401	5e-05
Trank1	chr9:111214242-111298279	leanveh	dbLSDi	OK	9.55077	0.641332	-3.89647	5e-05
Nceh1	chr3:27081925-27143833	leanveh	dbLSDi	OK	5.89626	24.3397	2.04544	5e-05
Lcp1	chr14:75536231-75630610	leanveh	dbLSDi	OK	21.8886	84.0442	1.94097	5e-05
Nckap1l	chr15:103284255-103329231	leanveh	dbLSDi	OK	8.31556	34.4305	2.0498	5e-05
Nedd9	chr13:41405284-41582689	leanveh	dbLSDi	OK	15.3266	52.8132	1.78486	5e-05
Anpep	chr7:86966688-86987238	leanveh	dbLSDi	OK	9.09806	35.7804	1.97554	5e-05
S100a4	chr3:90407691-90409967	leanveh	dbLSDi	OK	54.5084	392.58	2.84844	5e-05
Itgam	chr7:135206153-135262005	leanveh	dbLSDi	OK	6.46397	37.6109	2.54066	5e-05
Cd180	chr13:103483637-103496711	leanveh	dbLSDi	OK	1.80683	15.0456	3.05781	5e-05
Cyth4	chr15:78427476-78452449	leanveh	dbLSDi	OK	13.6936	49.2855	1.84766	5e-05
Vhl	chr6:113574014-113581627	leanveh	dbLSDi	OK	22.6654	85.0799	1.90832	5e-05
Atp2a3	chr11:72774670-72806545	leanveh	dbLSDi	OK	17.4793	61.6317	1.81803	5e-05
Trem2	chr17:48485725-48491598	leanveh	dbLSDi	OK	11.9115	124.572	3.38656	5e-05
Gusb	chr5:130464890-130478698	leanveh	dbLSDi	OK	23.8711	77.9062	1.70647	5e-05
Ctsk	chr3:95303207-95313284	leanveh	dbLSDi	OK	20.2245	222.707	3.46097	5e-05
Gcnt2	chr13:40955500-41056261	leanveh	dbLSDi	OK	12.568	60.1343	2.25844	5e-05
Atp6v0d2	chr4:19803984-19849713	leanveh	dbLSDi	OK	5.55632	61.9987	3.48004	5e-05
Acer2	chr4:86520317-86566785	leanveh	dbLSDi	OK	15.2361	55.2981	1.85974	5e-05
Sirpa	chr2:129418574-129457964	leanveh	dbLSDi	OK	26.9599	79.8842	1.56709	5e-05
Pcp4l1	chr1:173103394-173126399	leanveh	dbLSDi	OK	17.297	2.01458	-3.10197	5e-05
Tyrobp	chr7:31198806-31202598	leanveh	dbLSDi	OK	91.2165	457.713	2.32708	5e-05
Laptm5	chr4:130469248-130492063	leanveh	dbLSDi	OK	24.9702	126.106	2.33635	5e-05
Capg	chr6:72494432-72512974	leanveh	dbLSDi	OK	54.5476	193.482	1.82661	5e-05
Sykb	chr13:52678805-52744161	leanveh	dbLSDi	OK	7.12571	25.3765	1.83239	5e-05
Cd68	chr11:69477872-69479564	leanveh	dbLSDi	OK	21.6641	229.325	3.40401	5e-05
Tlr13	chrX:103338613-103355832	leanveh	dbLSDi	OK	3.12862	29.7785	3.25067	5e-05
Apbb1ip	chr2:22629846-22731173	leanveh	dbLSDi	OK	7.39423	37.8393	2.35541	5e-05
C3ar1	chr6:122797157-122806175	leanveh	dbLSDi	OK	4.30691	39.6576	3.20287	5e-05
Irak2	chr6:113588460-113645020	leanveh	dbLSDi	OK	22.8964	81.1824	1.82604	5e-05
Trim67	chr8:127316918-127358604	leanveh	dbLSDi	OK	3.1224	12.6831	2.02218	5e-05
Cpe	chr8:67071348-67171837	leanveh	dbLSDi	OK	71.9	19.0937	-1.9129	5e-05
Rcn1	chr2:105226104-105239476	leanveh	dbLSDi	OK	44.9815	9.80362	-2.19794	5e-05
Oxtr	chr6:112423677-112439802	leanveh	dbLSDi	OK	16.6661	131.923	2.98471	5e-05
Itgb2	chr10:76993092-77028419	leanveh	dbLSDi	OK	14.8839	116.92	2.9737	5e-05
Pld3	chr7:28317036-28338131	leanveh	dbLSDi	OK	33.0207	106.289	1.68654	5e-05
Mafb	chr2:160189412-160192801	leanveh	dbLSDi	OK	15.1779	54.4166	1.84208	5e-05
Cd200r1	chr16:44765848-44795090	leanveh	dbLSDi	OK	2.15493	15.6262	2.85826	5e-05
Pdk4	chr6:5433350-5446278	leanveh	dbLSDi	OK	15.5487	188.728	3.60144	5e-05
Myo1f	chr17:33692651-33744709	leanveh	dbLSDi	OK	5.44273	21.7725	2.0001	5e-05
Fbln2	chr6:91162757-91222534	leanveh	dbLSDi	OK	22.91	79.1856	1.78926	5e-05
Ccl9	chr11:83386418-83392138	leanveh	dbLSDi	OK	15.2452	68.4926	2.16759	5e-05
Spint2	chr7:30041348-30066996	leanveh	dbLSDi	OK	143.383	27.6211	-2.37603	5e-05
Plekho2	chr9:65402190-65427841	leanveh	dbLSDi	OK	16.0146	51.3532	1.68107	5e-05
Fcgr3	chr1:172981299-172989534	leanveh	dbLSDi	OK	29.7511	133.789	2.16894	5e-05
Slc1a3	chr15:8584123-8660807	leanveh	dbLSDi	OK	43.4637	11.7878	-1.88252	5e-05
Cybb	chrX:9012377-9046450	leanveh	dbLSDi	OK	6.81222	28.4819	2.06385	5e-05
Zfp185	chrX:70232677-70276882	leanveh	dbLSDi	OK	48.6926	6.3558	-2.93756	5e-05
5430435G22Rik	chr1:133585271-133610041	leanveh	dbLSDi	OK	7.28328	46.9758	2.68926	5e-05
Sash1	chr10:8442016-8605868	leanveh	dbLSDi	OK	16.4644	52.2241	1.66536	5e-05
Plin2	chr4:86302468-86315963	leanveh	dbLSDi	OK	102.302	579.049	2.50085	5e-05
Coro1c	chr5:114292447-114358715	leanveh	dbLSDi	OK	25.6726	73.397	1.51549	5e-05
Csf1r	chr18:61265225-61290793	leanveh	dbLSDi	OK	30.0699	102.044	1.76279	5e-05
Cd44	chr2:102651299-102741822	leanveh	dbLSDi	OK	4.87606	24.777	2.34522	5e-05
Gldc	chr19:30172936-30249908	leanveh	dbLSDi	OK	26.6659	0.804877	-5.05009	5e-05
C1qb	chr4:136436060-136442092	leanveh	dbLSDi	OK	108.086	390.032	1.85141	5e-05
Dnaja4	chr9:54547365-54564124	leanveh	dbLSDi	OK	72.7145	13.597	-2.41895	5e-05
Dmrt2	chr19:25746900-25753481	leanveh	dbLSDi	OK	16.4854	85.4581	2.37403	5e-05
Myo5a	chr9:74919012-75071494	leanveh	dbLSDi	OK	6.14935	20.5701	1.74204	5e-05
Ctss	chr3:95330707-95360325	leanveh	dbLSDi	OK	78.8848	554.127	2.8124	5e-05
Adamts2	chr11:50415586-50617551	leanveh	dbLSDi	OK	18.6635	53.7085	1.52493	5e-05
Lgmn	chr12:103632307-103677907	leanveh	dbLSDi	OK	66.0234	355.61	2.42924	5e-05
Pla2g7	chr17:43705399-43749150	leanveh	dbLSDi	OK	22.6213	93.1306	2.04157	5e-05
Tcirg1	chr19:3896049-3907133	leanveh	dbLSDi	OK	11.0247	47.9898	2.12199	5e-05
Mpeg1	chr19:12535268-12539775	leanveh	dbLSDi	OK	21.8301	158.041	2.85591	5e-05
Ccl2	chr11:81849078-81850954	leanveh	dbLSDi	OK	5.38366	62.5336	3.53797	5e-05
Lipa	chr19:34566805-34601964	leanveh	dbLSDi	OK	32.5881	164.119	2.33232	5e-05
Cd300a	chr11:114751354-114765965	leanveh	dbLSDi	OK	2.90578	19.2168	2.72537	5e-05
Clec10a	chr11:69980124-69984338	leanveh	dbLSDi	OK	34.9893	243.585	2.79944	5e-05
Slc5a7	chr17:54412914-54438359	leanveh	dbLSDi	OK	2.37967	79.2231	5.05709	5e-05
Fgf1	chr18:38998326-39130928	leanveh	dbLSDi	OK	15.7474	41.2815	1.39038	5e-05
Gja1	chr10:56097105-56110225	leanveh	dbLSDi	OK	111.916	33.2323	-1.75176	5e-05
Cdr2	chr7:128100549-128125826	leanveh	dbLSDi	OK	26.6961	139.847	2.38915	5e-05
Tgfbi	chr13:56710963-56740700	leanveh	dbLSDi	OK	26.6594	78.5387	1.55876	5e-05
Col12a1	chr9:79446797-79566485	leanveh	dbLSDi	OK	0.943102	10.0817	3.41817	5e-05
2310046K01Rik	chr2:151822246-151834994	leanveh	dbLSDi	OK	38.9694	5.32848	-2.87054	5e-05
Col5a3	chr9:20574493-20619478	leanveh	dbLSDi	OK	20.1852	69.1536	1.7765	5e-05
Cd24a	chr10:43298974-43304071	leanveh	dbLSDi	OK	63.0378	15.09	-2.06263	5e-05
C1qc	chr4:136445716-136448829	leanveh	dbLSDi	OK	109.884	374.84	1.77029	5e-05
Atp2b4	chr1:135600841-135650098	leanveh	dbLSDi	OK	39.4581	16.053	-1.29748	5e-05
Cdkn1a	chr17:29227930-29237667	leanveh	dbLSDi	OK	31.9752	160.95	2.33159	5e-05
Stom	chr2:35169509-35192529	leanveh	dbLSDi	OK	31.2188	85.1218	1.44711	5e-05
Gstm7	chr3:107729251-107734663	leanveh	dbLSDi	OK	283.259	9.40896	-4.91194	5e-05
Mrc2	chr11:105153959-105212459	leanveh	dbLSDi	OK	5.10222	97.0124	4.24897	5e-05
BC021891	chr8:128434349-128471339	leanveh	dbLSDi	OK	7.35715	0.614225	-3.58231	5e-05
Vat1	chr11:101320061-101327513	leanveh	dbLSDi	OK	72.129	218.352	1.59801	5e-05
Tnfrsf1b	chr4:144802270-144836773	leanveh	dbLSDi	OK	7.20614	23.3877	1.69846	5e-05
Acsbg1	chr9:54452803-54509692	leanveh	dbLSDi	OK	52.3254	1.93378	-4.75802	5e-05
P2rx7	chr5:123093919-123141441	leanveh	dbLSDi	OK	4.70724	18.5988	1.98226	5e-05
Anxa1	chr19:20447923-20465161	leanveh	dbLSDi	OK	102.43	485.901	2.24603	5e-05
Atp6v1b2	chr8:71561606-71637616	leanveh	dbLSDi	OK	61.6487	179.176	1.53924	5e-05
Emilin2	chr17:71601515-71660305	leanveh	dbLSDi	OK	10.091	42.2504	2.0659	5e-05
Arl4c	chr1:90594800-90598766	leanveh	dbLSDi	OK	29.948	4.27644	-2.80798	5e-05
Sox9	chr11:112643523-112649071	leanveh	dbLSDi	OK	11.712	0.986411	-3.56965	5e-05
Fads2	chr19:10138653-10175993	leanveh	dbLSDi	OK	59.7701	4.3735	-3.77256	5e-05
Alox5ap	chr5:150076633-150099623	leanveh	dbLSDi	OK	30.4684	135.551	2.15345	5e-05
Lyz2	chr10:116714596-116719328	leanveh	dbLSDi	OK	305.493	1446.01	2.24286	5e-05
Ctsz	chr2:174241304-174264493	leanveh	dbLSDi	OK	97.0496	343.579	1.82385	5e-05
Fgf13	chrX:56315327-56387613	leanveh	dbLSDi	OK	5.32767	38.5123	2.85374	5e-05
Gpr64	chrX:156828621-156936002	leanveh	dbLSDi	OK	45.9688	5.79591	-2.98755	5e-05
Slc7a4	chr16:17572110-17576764	leanveh	dbLSDi	OK	34.8044	1.23156	-4.82071	5e-05
Spint1	chr2:119063095-119075249	leanveh	dbLSDi	OK	11.6179	1.03013	-3.49545	5e-05
Adrb3	chr8:28336247-28340060	leanveh	dbLSDi	OK	197.148	7.12911	-4.78941	5e-05
Ehd3	chr17:74154180-74181433	leanveh	dbLSDi	OK	10.9007	75.3528	2.78925	5e-05
Fam13a	chr6:58883529-58974496	leanveh	dbLSDi	OK	57.6921	12.2492	-2.23568	5e-05
Hmox1	chr8:77617516-77624492	leanveh	dbLSDi	OK	34.9266	402.001	3.5248	5e-05
S100a6	chr3:90416815-90418336	leanveh	dbLSDi	OK	179.236	705.363	1.97651	5e-05
Tead1	chr7:119822833-120050319	leanveh	dbLSDi	OK	10.5852	34.4046	1.70055	5e-05
Ptprf	chr4:117880817-117964002	leanveh	dbLSDi	OK	19.0149	3.71409	-2.35605	5e-05
Thbs1	chr2:117937657-117952869	leanveh	dbLSDi	OK	15.7941	106.046	2.74724	5e-05
F13a1	chr13:36959046-37142113	leanveh	dbLSDi	OK	21.4282	69.5934	1.69944	5e-05
Tatdn2	chr6:113647492-113661062	leanveh	dbLSDi	OK	21.6473	85.0365	1.9739	5e-05
Vgll3	chr16:65815877-65863311	leanveh	dbLSDi	OK	4.84331	43.9044	3.1803	5e-05
Cstb	chr10:77888414-77890367	leanveh	dbLSDi	OK	153.476	508.79	1.72906	5e-05
Marcksl1	chr4:129190824-129193225	leanveh	dbLSDi	OK	62.5579	12.3521	-2.34044	5e-05
Esr1	chr10:5342779-5734495	leanveh	dbLSDi	OK	15.9743	3.91439	-2.02889	5e-05
Dse	chr10:33871198-33927357	leanveh	dbLSDi	OK	8.90732	31.7632	1.83429	5e-05
Serpinf1	chr11:75223530-75236125	leanveh	dbLSDi	OK	58.396	238.753	2.03157	5e-05
Gda	chr19:21465796-21547151	leanveh	dbLSDi	OK	17.1068	62.7038	1.87399	5e-05
Dock8	chr19:25074018-25276922	leanveh	dbLSDi	OK	4.65054	27.9495	2.58736	5e-05
Creg1	chr1:167693910-167705435	leanveh	dbLSDi	OK	41.8388	150.309	1.84502	5e-05
Mdfic	chr6:15670660-15752169	leanveh	dbLSDi	OK	17.6734	80.845	2.19358	5e-05
Gltp	chr5:115119510-115140944	leanveh	dbLSDi	OK	63.1595	218.309	1.7893	5e-05
Suox	chr10:128106942-128110974	leanveh	dbLSDi	OK	50.4199	9.14563	-2.46284	5e-05
Cd163	chr6:124254668-124280545	leanveh	dbLSDi	OK	14.0199	54.5173	1.95923	5e-05
Nek6	chr2:38367216-38443010	leanveh	dbLSDi	OK	13.6025	47.3745	1.80024	5e-05
Hdac6	chrX:7507247-7525015	leanveh	dbLSDi	OK	45.5328	4.46163	-3.35126	5e-05
Ramp1	chr1:93076398-93121773	leanveh	dbLSDi	OK	47.4714	2.19486	-4.43486	5e-05
Myl9	chr2:156601199-156607393	leanveh	dbLSDi	OK	176.503	63.5764	-1.47313	5e-05
Ccl6	chr11:83395562-83437195	leanveh	dbLSDi	OK	55.0321	340.403	2.6289	5e-05
Wfs1	chr5:37357342-37380221	leanveh	dbLSDi	OK	11.1297	48.4865	2.12316	5e-05
Slc11a1	chr1:74421776-74432625	leanveh	dbLSDi	OK	10.094	62.849	2.6384	5e-05
Hoxb9	chr11:96132643-96137907	leanveh	dbLSDi	OK	9.32303	0.818506	-3.50973	5e-05
Ninj1	chr13:49282915-49291620	leanveh	dbLSDi	OK	65.5668	194.677	1.57004	5e-05
Mt2	chr8:96696517-96697467	leanveh	dbLSDi	OK	370.212	1390.52	1.9092	5e-05
Tnfaip2	chr12:112680871-112693229	leanveh	dbLSDi	OK	9.05018	33.5513	1.89035	5e-05
Fam129b	chr2:32731653-32816771	leanveh	dbLSDi	OK	33.4267	208.981	2.6443	5e-05
1700047G03Rik	chr15:11896816-11899838	leanveh	dbLSDi	OK	25.6744	137.044	2.41623	5e-05
Pam	chr1:99717670-99992209	leanveh	dbLSDi	OK	23.6445	91.0373	1.94495	5e-05
Lox	chr18:52676891-52689362	leanveh	dbLSDi	OK	15.1343	204.237	3.75435	5e-05
Smarcd3	chr5:24098439-24107820	leanveh	dbLSDi	OK	82.1423	7.42094	-3.46845	5e-05
Myh11	chr16:14194619-14291501	leanveh	dbLSDi	OK	21.2756	5.29421	-2.00672	5e-05
Cryab	chr9:50560862-50564738	leanveh	dbLSDi	OK	103.919	348.82	1.74702	5e-05
Syne2	chr12:76919304-77211915	leanveh	dbLSDi	OK	15.3678	3.97499	-1.95088	5e-05
Hspb7	chr4:140976693-140981225	leanveh	dbLSDi	OK	12.1883	178.71	3.87405	5e-05
Tmem30b	chr12:74644100-74647382	leanveh	dbLSDi	OK	15.912	1.13535	-3.80892	5e-05
Mmp19	chr10:128227965-128241426	leanveh	dbLSDi	OK	15.1712	85.0848	2.48756	5e-05
Fam49a	chr12:12268944-12383167	leanveh	dbLSDi	OK	6.45732	26.087	2.01432	5e-05
Thbs2	chr17:14802506-14831269	leanveh	dbLSDi	OK	14.4658	73.253	2.34024	5e-05
Defb38	chr8:19023463-19026529	leanveh	dbLSDi	OK	626.674	0	#NAME?	5e-05
Defb39	chr8:19052825-19064810	leanveh	dbLSDi	OK	337.819	0	#NAME?	5e-05
BC048679	chr7:88639159-88643216	leanveh	dbLSDi	OK	290.591	0	#NAME?	5e-05
Defb40	chr8:18974939-18978116	leanveh	dbLSDi	OK	254.337	0	#NAME?	5e-05
Gm17252	chr9:35492663-35494956	leanveh	dbLSDi	OK	113.921	0	#NAME?	5e-05
9230107M04Rik	chr7:14140214-14156416	leanveh	dbLSDi	OK	88.1138	0	#NAME?	5e-05
Defb26	chr2:152333491-152337472	leanveh	dbLSDi	OK	80.9941	0	#NAME?	5e-05
Abcb5	chr12:120106296-120204894	leanveh	dbLSDi	OK	30.1913	0	#NAME?	5e-05
Crisp4	chr1:18105271-18127132	leanveh	dbLSDi	OK	18.8936	0	#NAME?	5e-05
Gm10823	chr16:27850015-27926214	leanveh	dbLSDi	OK	10.7345	0	#NAME?	5e-05
Zfp648	chr1:156048316-156052804	leanveh	dbLSDi	OK	2.91149	0	#NAME?	5e-05
Ces1f	chr8:95780134-95803635	leanveh	dbLSDi	OK	31.4845	5.75011	-2.45298	5e-05
Dpep1	chr8:125710134-125725713	leanveh	dbLSDi	OK	47.2766	166.134	1.81315	5e-05
Cds1	chr5:102194148-102252871	leanveh	dbLSDi	OK	32.4457	9.26361	-1.80838	5e-05
Nrbp2	chr15:75916023-75920443	leanveh	dbLSDi	OK	58.6183	18.5004	-1.66379	5e-05
Nt5e	chr9:88222446-88266927	leanveh	dbLSDi	OK	19.886	1.72041	-3.53092	5e-05
Tsc22d2	chr3:58219610-58270709	leanveh	dbLSDi	OK	5.3385	18.362	1.78222	5e-05
Myo6	chr9:80012840-80159536	leanveh	dbLSDi	OK	28.9051	8.1169	-1.83232	5e-05
Ezr	chr17:6942479-6987129	leanveh	dbLSDi	OK	45.1365	11.3609	-1.99021	5e-05
Fbxl5	chr5:44135856-44173388	leanveh	dbLSDi	OK	33.1317	91.1655	1.46027	5e-05
Col4a3	chr1:82583495-82718634	leanveh	dbLSDi	OK	3.05103	0.280014	-3.44572	5e-05
Lgals3	chr14:47993534-48005842	leanveh	dbLSDi	OK	116.442	862.211	2.88843	5e-05
Itga7	chr10:128370868-128398044	leanveh	dbLSDi	OK	38.8112	143.567	1.88718	5e-05
G6pdx	chrX:71638629-71699117	leanveh	dbLSDi	OK	57.6405	207.21	1.84594	5e-05
Kirrel	chr3:86882513-86978669	leanveh	dbLSDi	OK	13.508	41.2169	1.60942	5e-05
Trfr2	chr5:138011078-138028709	leanveh	dbLSDi	OK	1.043	18.2959	4.1327	5e-05
Gyk	chrX:82947275-83022158	leanveh	dbLSDi	OK	22.3031	2.8357	-2.97546	5e-05
Atp1b1	chr1:166237805-166388486	leanveh	dbLSDi	OK	94.3562	4.9583	-4.2502	5e-05
Lipg	chr18:75098975-75120917	leanveh	dbLSDi	OK	18.1141	0.749386	-4.59526	5e-05
Gstm6	chr3:107741765-107746667	leanveh	dbLSDi	OK	75.6487	6.73094	-3.49044	5e-05
Ncan	chr8:72616983-72644743	leanveh	dbLSDi	OK	0.513085	8.16649	3.99245	5e-05
Gprc5c	chr11:114712845-114733931	leanveh	dbLSDi	OK	26.924	7.54382	-1.83553	5e-05
Svep1	chr4:58055667-58219468	leanveh	dbLSDi	OK	5.67489	16.1674	1.51043	5e-05
Vldlr	chr19:27291509-27328721	leanveh	dbLSDi	OK	10.9808	31.119	1.50281	5e-05
Ildr2	chr1:168184269-168246963	leanveh	dbLSDi	OK	8.48283	1.2786	-2.72998	5e-05
Htra3	chr5:35994681-36022431	leanveh	dbLSDi	OK	100.207	448.182	2.1611	5e-05
Thbd	chr2:148230206-148233924	leanveh	dbLSDi	OK	65.8356	25.4789	-1.36956	5e-05
Ifi27l2a	chr12:104680376-104681890	leanveh	dbLSDi	OK	821.186	223.038	-1.88042	5e-05
Stard10	chr7:108469832-108494826	leanveh	dbLSDi	OK	127.379	24.6037	-2.37218	5e-05
Orm1	chr4:63005599-63009196	leanveh	dbLSDi	OK	117.656	407.321	1.79159	5e-05
Hip1	chr5:135882387-136020992	leanveh	dbLSDi	OK	16.67	43.1909	1.37347	5e-05
Pqlc3	chr12:16995453-17006924	leanveh	dbLSDi	OK	10.8868	44.3656	2.02686	5e-05
Adap2	chr11:79967663-79992329	leanveh	dbLSDi	OK	35.2536	112.573	1.67502	5e-05
Mboat1	chr13:30228358-30338563	leanveh	dbLSDi	OK	8.04125	0.779859	-3.36613	5e-05
Hspb1	chr5:136363788-136365433	leanveh	dbLSDi	OK	91.3797	296.542	1.69829	5e-05
Fhl1	chrX:53984963-54046523	leanveh	dbLSDi	OK	132.371	490.26	1.88896	5e-05
Atg4a	chrX:137491455-137598813	leanveh	dbLSDi	OK	45.1623	11.8603	-1.92898	5e-05
Epn2	chr11:61330750-61393153	leanveh	dbLSDi	OK	24.8969	63.5032	1.35086	5e-05
Cyp2e1	chr7:147949730-147960876	leanveh	dbLSDi	OK	1511.19	106.143	-3.83161	5e-05
Ampd3	chr7:117916117-117955909	leanveh	dbLSDi	OK	17.4338	49.4377	1.50372	5e-05
Sfrp5	chr19:42272460-42276742	leanveh	dbLSDi	OK	92.6887	299.39	1.69156	5e-05
Ddit4l	chr3:137286635-137291296	leanveh	dbLSDi	OK	8.24775	1.06353	-2.95513	5e-05
Ap1s3	chr1:79603450-79668547	leanveh	dbLSDi	OK	7.53135	0.933681	-3.01191	5e-05
Chdh	chr14:30822185-31340242	leanveh	dbLSDi	OK	28.6622	3.63636	-2.97858	5e-05
Sntn	chr14:14503389-14515662	leanveh	dbLSDi	OK	10.5497	0	#NAME?	5e-05
Ly6f	chr15:75098850-75102664	leanveh	dbLSDi	OK	197.998	0	#NAME?	5e-05
Spag11a	chr8:19157886-19159578	leanveh	dbLSDi	OK	29.3973	0	#NAME?	5e-05
Ces5a	chr8:96038094-96059607	leanveh	dbLSDi	OK	261.579	0	#NAME?	5e-05
Mia1	chr7:27964759-27966168	leanveh	dbLSDi	OK	18.4126	0	#NAME?	5e-05
Defb2	chr8:22950397-22953953	leanveh	dbLSDi	OK	227.924	0	#NAME?	5e-05
Gpnmb	chr6:48986516-49008181	leanveh	dbLSDi	OK	28.3916	648.13	4.51275	5e-05
Rnase9	chr14:51658133-51661542	leanveh	dbLSDi	OK	201.012	0	#NAME?	5e-05
Cgn	chr3:94563991-94590437	leanveh	dbLSDi	OK	8.30738	0.976328	-3.08896	5e-05
Frmpd4	chrX:163909240-165015165	leanveh	dbLSDi	OK	1.7555	0	#NAME?	5e-05
Defb37	chr8:18986232-18991055	leanveh	dbLSDi	OK	325.946	0	#NAME?	5e-05
AY761185	chr8_random:264606-265659	leanveh	dbLSDi	OK	74.1513	0	#NAME?	5e-05
Fam84a	chr12:14154403-14158844	leanveh	dbLSDi	OK	9.60211	1.28431	-2.90236	5e-05
Lilrb4	chr10:51210780-51216417	leanveh	dbLSDi	OK	10.9165	92.6656	3.08552	0.0001
Gpc1	chr1:94728262-94756773	leanveh	dbLSDi	OK	14.5288	46.6166	1.68193	0.0001
Dpep2	chr8:108508956-108520323	leanveh	dbLSDi	OK	2.01395	15.7759	2.96963	0.0001
Sh3pxd2b	chr11:32247810-32328183	leanveh	dbLSDi	OK	4.92983	15.4076	1.64403	0.0001
Daglb	chr5:144225360-144265310	leanveh	dbLSDi	OK	10.038	30.3538	1.59641	0.0001
Fabp5	chr3:10012605-10016610	leanveh	dbLSDi	OK	152.872	448.326	1.55222	0.0001
AI607873	chr1:175653558-175671940	leanveh	dbLSDi	OK	9.09289	32.6056	1.84231	0.0001
Ldhd	chr8:114150170-114154222	leanveh	dbLSDi	OK	42.6086	9.52548	-2.16128	0.0001
Cyth3	chr5:144383315-144471117	leanveh	dbLSDi	OK	20.7106	53.0697	1.35752	0.0001
Akap2	chr4:57858119-57909856	leanveh	dbLSDi	OK	32.6067	109.027	1.74145	0.0001
Dmpk	chr7:19669197-19679169	leanveh	dbLSDi	OK	51.7223	143.468	1.47187	0.0001
Eif1a	chr18:46757357-46769879	leanveh	dbLSDi	OK	31.1391	84.4687	1.43969	0.0001
Atp6v0a1	chr11:100870765-100925031	leanveh	dbLSDi	OK	47.0705	134.302	1.51258	0.0001
Pgd	chr4:148524093-148540816	leanveh	dbLSDi	OK	103.387	320.735	1.63333	0.0001
Cyb5r3	chr15:82983931-83002638	leanveh	dbLSDi	OK	124.78	306.144	1.29482	0.0001
Maff	chr15:79178107-79189506	leanveh	dbLSDi	OK	6.43244	34.8075	2.43596	0.0001
2810474O19Rik	chr6:149257935-149284185	leanveh	dbLSDi	OK	9.46873	27.4991	1.53814	0.0001
Tmem120b	chr5:123526283-123567454	leanveh	dbLSDi	OK	63.3122	174.493	1.46262	0.0001
Galntl2	chr14:32842288-32871512	leanveh	dbLSDi	OK	17.9084	62.6557	1.80681	0.0001
Serping1	chr2:84605516-84615586	leanveh	dbLSDi	OK	126.905	408.867	1.68788	0.0001
Srd5a1	chr13:69712326-69750341	leanveh	dbLSDi	OK	6.31272	0.76796	-3.03916	0.0001
Ctgf	chr10:24315247-24318488	leanveh	dbLSDi	OK	62.3102	22.3073	-1.48195	0.0001
Pdzrn3	chr6:101099600-101327891	leanveh	dbLSDi	OK	13.3623	40.6302	1.60438	0.00015
Apobec1	chr6:122527809-122552462	leanveh	dbLSDi	OK	9.40672	42.4245	2.17313	0.00015
Dusp9	chrX:70884779-70888853	leanveh	dbLSDi	OK	2.05684	17.4485	3.0846	0.00015
C5ar1	chr7:16832091-16844889	leanveh	dbLSDi	OK	6.86208	39.6913	2.5321	0.00015
Irf5	chr6:29476732-29487319	leanveh	dbLSDi	OK	9.45783	37.9563	2.00476	0.00015
Grn	chr11:102291635-102298123	leanveh	dbLSDi	OK	149.504	427.945	1.51724	0.00015
C1qa	chr4:136451830-136454759	leanveh	dbLSDi	OK	125.423	338.911	1.43411	0.00015
C7	chr15:4938761-5013773	leanveh	dbLSDi	OK	36.2121	2.65786	-3.76814	0.00015
Syp	chrX:7215705-7230382	leanveh	dbLSDi	OK	8.19969	36.7629	2.16461	0.00015
Gab2	chr7:104230260-104457461	leanveh	dbLSDi	OK	11.1382	29.729	1.41636	0.00015
Rlf	chr4:120817977-120861139	leanveh	dbLSDi	OK	6.52076	17.1316	1.39355	0.00015
Mosc1	chr1:186610645-186635192	leanveh	dbLSDi	OK	6.11946	33.376	2.44733	0.00015
Csf2rb	chr15:78156419-78181431	leanveh	dbLSDi	OK	11.9154	33.3909	1.48663	0.00015
Pde2a	chr7:108570204-108661343	leanveh	dbLSDi	OK	39.3175	114.247	1.53891	0.00015
Phf19	chr2:34749274-34769496	leanveh	dbLSDi	OK	8.046	0.846122	-3.24933	0.00015
Slc48a1	chr15:97614795-97674933	leanveh	dbLSDi	OK	109.896	343.905	1.64587	0.00015
Gm11428	chr11:83517557-83519771	leanveh	dbLSDi	OK	19.917	195.25	3.29325	0.00015
Gstm5	chr3:107680147-107701603	leanveh	dbLSDi	OK	413.696	98.5676	-2.06939	0.0002
Sdc1	chr12:8778201-8800493	leanveh	dbLSDi	OK	12.5873	38.704	1.62051	0.0002
Cd84	chr1:173769827-173820849	leanveh	dbLSDi	OK	5.13066	34.0053	2.72854	0.0002
Ubd	chr17:37330836-37333046	leanveh	dbLSDi	OK	7.00576	67.8977	3.27675	0.0002
Col6a2	chr10:76058500-76086149	leanveh	dbLSDi	OK	68.8112	193.658	1.4928	0.0002
Lmna	chr3:88285070-88307254	leanveh	dbLSDi	OK	42.2333	110.949	1.39344	0.0002
Foxred2	chr15:77770951-77787152	leanveh	dbLSDi	OK	26.2624	4.173	-2.65384	0.0002
Nus1	chr10:52137352-52159998	leanveh	dbLSDi	OK	24.4849	61.9654	1.33957	0.0002
Inadl	chr4:98062516-98386294	leanveh	dbLSDi	OK	7.04246	0.628297	-3.48656	0.0002
6330406I15Rik	chr5:150214380-150234278	leanveh	dbLSDi	OK	14.7815	40.2908	1.44666	0.0002
Cad	chr5:31357183-31380852	leanveh	dbLSDi	OK	30.0197	4.30403	-2.80215	0.0002
Slc24a6	chr5:120961200-120984033	leanveh	dbLSDi	OK	18.7618	55.4862	1.56433	0.0002
Gsta4	chr9:78039772-78057156	leanveh	dbLSDi	OK	119.793	41.9685	-1.51317	0.0002
Ncam1	chr9:49310250-49607174	leanveh	dbLSDi	OK	6.5952	0.134178	-5.6192	0.0002
Il4ra	chr7:132695795-132722988	leanveh	dbLSDi	OK	11.7048	30.8795	1.39954	0.0002
Fam20c	chr5:139231034-139286017	leanveh	dbLSDi	OK	20.5184	58.0734	1.50096	0.0002
Rbm28	chr6:29073572-29114724	leanveh	dbLSDi	OK	16.5796	42.4616	1.35675	0.0002
Serpina3m	chr12:105625373-105632467	leanveh	dbLSDi	OK	3.25544	30.3687	3.22166	0.0002
Amt	chr9:108199252-108203928	leanveh	dbLSDi	OK	13.0149	1.80518	-2.84995	0.0002
Itgb7	chr15:102046425-102062366	leanveh	dbLSDi	OK	1.60869	10.8778	2.75743	0.0002
C3	chr17:57343395-57367559	leanveh	dbLSDi	OK	48.0669	136.85	1.50948	0.0002
Ccnd1	chr7:152115835-152125830	leanveh	dbLSDi	OK	24.0609	7.23751	-1.73312	0.00025
Slc37a2	chr9:37036733-37063323	leanveh	dbLSDi	OK	1.68194	22.9128	3.76796	0.00025
Kap	chr6:133799872-133803685	leanveh	dbLSDi	OK	381.428	27.1246	-3.81374	0.00025
Fcer1g	chr1:173159702-173164480	leanveh	dbLSDi	OK	41.6776	152.27	1.86929	0.00025
Ccl8	chr11:81928686-81930301	leanveh	dbLSDi	OK	48.2879	283.38	2.553	0.00025
Fam198b	chr3:79689851-79750200	leanveh	dbLSDi	OK	11.8009	30.3561	1.36309	0.00025
Espn	chr4:151494984-151526316	leanveh	dbLSDi	OK	28.9567	2.24808	-3.68713	0.00025
Fkbp4	chr6:128380124-128388649	leanveh	dbLSDi	OK	72.7752	27.6306	-1.39718	0.00025
Adam9	chr8:26060082-26127394	leanveh	dbLSDi	OK	25.9247	60.2203	1.21592	0.00025
C2	chr17:34999546-35019045	leanveh	dbLSDi	OK	40.1768	8.51182	-2.23882	0.00025
Enah	chr1:183834575-183950111	leanveh	dbLSDi	OK	15.5027	3.68326	-2.07347	0.00025
Zmiz1	chr14:26278670-26486233	leanveh	dbLSDi	OK	16.8579	42.0507	1.31871	0.00025
Tpm4	chr8:74659190-74677028	leanveh	dbLSDi	OK	92.7899	219.202	1.24022	0.00025
Ucp2	chr7:107641853-107650682	leanveh	dbLSDi	OK	74.8515	200.324	1.42023	0.00025
Ldhb	chr6:142438768-142456463	leanveh	dbLSDi	OK	69.7885	21.5578	-1.69478	0.00025
Tcfcp2l1	chr1:120524521-120581745	leanveh	dbLSDi	OK	3.13263	0.371681	-3.07524	0.00025
Smpdl3a	chr10:57514349-57531636	leanveh	dbLSDi	OK	61.0716	148.019	1.27721	0.00025
Hoxb6	chr11:96160484-96162883	leanveh	dbLSDi	OK	35.526	3.78381	-3.23097	0.00025
3110082D06Rik	chr17:42452895-42644690	leanveh	dbLSDi	OK	0.438935	3.27778	2.90064	0.00025
Gprin3	chr6:59302454-59376284	leanveh	dbLSDi	OK	0.945725	6.64381	2.81252	0.00025
Optn	chr2:4941687-4984984	leanveh	dbLSDi	OK	17.2944	51.5352	1.57525	0.00025
Lats2	chr14:58308498-58364960	leanveh	dbLSDi	OK	16.3174	37.4291	1.19775	0.00025
Gria1	chr11:56825192-57143746	leanveh	dbLSDi	OK	2.05833	0.0353778	-5.86249	0.00025
Hba-a1_dup2	chr11:32196488-32197310	leanveh	dbLSDi	OK	594.165	1921.85	1.69356	0.0003
Cotl1	chr8:122333113-122364479	leanveh	dbLSDi	OK	41.1337	112.419	1.45049	0.0003
2022-09-09	chr11:117060974-117223639	leanveh	dbLSDi	OK	32.5556	80.5503	1.30698	0.0003
Tmem38b	chr4:53838916-53874890	leanveh	dbLSDi	OK	12.8242	37.2071	1.53671	0.0003
Sdc4	chr2:164249746-164268688	leanveh	dbLSDi	OK	35.2272	88.1724	1.32364	0.0003
Ap3s1	chr18:46901570-46950480	leanveh	dbLSDi	OK	49.4402	117.139	1.24446	0.0003
Mid1ip1	chrX:10294490-10296828	leanveh	dbLSDi	OK	97.6961	28.6003	-1.77227	0.0003
Epb4.1l4b	chr4:57074597-57156028	leanveh	dbLSDi	OK	7.22429	0.983195	-2.87731	0.0003
Blvrb	chr7:28232996-28251000	leanveh	dbLSDi	OK	70.0971	180.054	1.361	0.0003
Tmem45b	chr9:31233780-31271823	leanveh	dbLSDi	OK	111.75	264.5	1.24299	0.0003
Pi15	chr1:17591981-17621020	leanveh	dbLSDi	OK	2.34008	0.314096	-2.89728	0.0003
Col7a1	chr9:108855789-108886920	leanveh	dbLSDi	OK	1.3071	0.202054	-2.69356	0.0003
Rab8b	chr9:66691470-66767512	leanveh	dbLSDi	OK	10.1061	26.6266	1.39765	0.00035
Rbpms	chr8:34893115-35040313	leanveh	dbLSDi	OK	40.8208	107.217	1.39316	0.00035
Itgax	chr7:135273081-135294171	leanveh	dbLSDi	OK	4.49121	26.2532	2.54731	0.00035
Slc2a3	chr6:122677826-122692763	leanveh	dbLSDi	OK	37.8968	9.48875	-1.99779	0.00035
Fstl3	chr10:79240018-79251730	leanveh	dbLSDi	OK	10.1975	34.859	1.77332	0.00035
Abcg1	chr17:31194638-31254926	leanveh	dbLSDi	OK	3.94338	15.7301	1.99602	0.00035
Ces1d	chr8:95689970-95721703	leanveh	dbLSDi	OK	363.234	122.348	-1.56991	0.00035
Rap1gap	chr4:137237617-137285782	leanveh	dbLSDi	OK	6.88222	0.980822	-2.81081	0.00035
Tnfrsf23	chr7:150851711-150871777	leanveh	dbLSDi	OK	0.937437	6.45193	2.78294	0.00035
Hpdl	chr4:116492511-116494113	leanveh	dbLSDi	OK	15.565	2.22588	-2.80586	0.00035
Adamts5	chr16:85858401-85901370	leanveh	dbLSDi	OK	23.1711	59.5612	1.36204	0.00035
Cltb	chr13:54694299-54712633	leanveh	dbLSDi	OK	45.1329	108.797	1.26939	0.00035
Ccdc108	chr1:74948653-74982173	leanveh	dbLSDi	OK	9.68422	1.2472	-2.95695	0.00035
Fnip2	chr3:79149297-79371601	leanveh	dbLSDi	OK	4.63874	15.6708	1.75627	0.0004
Atp13a2	chr4:140542787-140563616	leanveh	dbLSDi	OK	19.577	45.1467	1.20546	0.0004
Tbx2	chr11:85646116-85655450	leanveh	dbLSDi	OK	22.762	5.9054	-1.94652	0.0004
Trpv2	chr11:62387987-62413807	leanveh	dbLSDi	OK	9.25	26.9546	1.54301	0.0004
Pde7a	chr3:19125917-19211322	leanveh	dbLSDi	OK	8.31	29.7715	1.84101	0.0004
Ctsl	chr13:64464521-64471614	leanveh	dbLSDi	OK	236.353	1099.13	2.21735	0.0004
Adam23	chr1:63492477-63643089	leanveh	dbLSDi	OK	10.8379	33.7797	1.64008	0.0004
Pex5l	chr3:32848552-33042004	leanveh	dbLSDi	OK	1.36811	41.5623	4.92502	0.0004
Stim1	chr7:109416337-109585369	leanveh	dbLSDi	OK	49.6527	119.6	1.26827	0.0004
Saa3	chr7:53967367-53971046	leanveh	dbLSDi	OK	23.3841	206.294	3.1411	0.00045
Cldn11	chr3:31048841-31063248	leanveh	dbLSDi	OK	40.2553	4.73575	-3.08751	0.00045
Mrc1	chr2:14151040-14253650	leanveh	dbLSDi	OK	16.6566	40.5119	1.28225	0.00045
Mmp12	chr9:7347373-7360461	leanveh	dbLSDi	OK	14.7312	94.0396	2.67439	0.00045
Slc22a4	chr11:53796627-53841592	leanveh	dbLSDi	OK	6.48532	31.0072	2.25735	0.00045
Rassf3	chr10:120847406-120913306	leanveh	dbLSDi	OK	17.5703	45.9505	1.38694	0.00045
Tgfbr2	chr9:115996812-116084481	leanveh	dbLSDi	OK	30.8092	76.5643	1.31331	0.00045
Ptpn13	chr5:103854210-104027380	leanveh	dbLSDi	OK	9.04597	2.41134	-1.90744	0.00045
Hprt	chrX:50341254-50374837	leanveh	dbLSDi	OK	90.5493	206.93	1.19236	0.00045
Mthfd1l	chr10:6179459-6373466	leanveh	dbLSDi	OK	10.5822	1.684	-2.65168	0.00045
Gstt1	chr10:75246557-75261329	leanveh	dbLSDi	OK	79.7856	27.6304	-1.52987	0.00045
Fcna	chr2:25480186-25483494	leanveh	dbLSDi	OK	6.18113	63.3393	3.35716	0.00045
Cyb561	chr11:105795017-105805461	leanveh	dbLSDi	OK	133.5	11.2598	-3.5676	0.0005
Lrrc33	chr16:32142910-32165562	leanveh	dbLSDi	OK	9.59204	25.6306	1.41796	0.0005
Inha	chr1:75503651-75506929	leanveh	dbLSDi	OK	28.2294	4.20005	-2.74872	0.0005
Prom1	chr5:44384860-44492975	leanveh	dbLSDi	OK	67.8524	2.30064	-4.88229	0.0005
Penk	chr4:4060682-4065592	leanveh	dbLSDi	OK	91.7877	31.7486	-1.53161	0.0005
Ank3	chr10:68996455-69490184	leanveh	dbLSDi	OK	6.31552	0.423104	-3.89982	0.0005
Pon2	chr6:5214623-5248373	leanveh	dbLSDi	OK	55.5513	123.029	1.14711	0.0005
Tspan17	chr13:54890765-54898136	leanveh	dbLSDi	OK	46.4429	109.43	1.23648	0.0005
Serpine1	chr5:137537375-137548142	leanveh	dbLSDi	OK	58.331	160.736	1.46236	0.00055
Atp1a3	chr7:25763187-25790914	leanveh	dbLSDi	OK	2.01897	18.5587	3.2004	0.00055
Tmem104	chr11:115048800-115108339	leanveh	dbLSDi	OK	7.39384	20.4094	1.46484	0.00055
Zfand2a	chr5:139947169-139960445	leanveh	dbLSDi	OK	12.1235	32.6046	1.42727	0.00055
Mmp11	chr10:75385968-75395208	leanveh	dbLSDi	OK	6.77795	31.1424	2.19996	0.00055
Podn	chr4:107687397-107704695	leanveh	dbLSDi	OK	36.6458	14.5456	-1.33306	0.00055
Prm1	chr16:10796424-10796916	leanveh	dbLSDi	OK	471.361	86.3755	-2.44814	0.00055
Lep	chr6:29010220-29023876	leanveh	dbLSDi	OK	227.602	1539.1	2.7575	0.00055
Plek	chr11:16871208-16908721	leanveh	dbLSDi	OK	4.12313	24.9299	2.59606	0.0006
Sfpi1	chr2:90936953-90955913	leanveh	dbLSDi	OK	14.186	82.998	2.54861	0.0006
Tubb6	chr18:67550384-67562403	leanveh	dbLSDi	OK	20.9228	53.8243	1.36318	0.0006
Fam124a	chr14:63174573-63227322	leanveh	dbLSDi	OK	5.0474	17.5763	1.80002	0.0006
Gpr81	chr5:124326744-124330029	leanveh	dbLSDi	OK	25.0032	6.9478	-1.84748	0.0006
Ap1s2	chrX:160347091-160367478	leanveh	dbLSDi	OK	22.153	4.41629	-2.32659	0.0006
Tst	chr15:78229985-78236289	leanveh	dbLSDi	OK	76.1331	14.9926	-2.34427	0.0006
Rasd2	chr8:77737842-77748012	leanveh	dbLSDi	OK	8.64806	1.34456	-2.68524	0.0006
Cyp4v3	chr8:46391155-46418550	leanveh	dbLSDi	OK	22.7329	59.1786	1.38029	0.0006
Wwp1	chr4:19536819-19636140	leanveh	dbLSDi	OK	12.2628	29.3953	1.2613	0.00065
Wnk4	chr11:101121880-101138723	leanveh	dbLSDi	OK	10.5388	1.34463	-2.97042	0.00065
Arl11	chr14:61928589-61930773	leanveh	dbLSDi	OK	2.46649	13.1694	2.41666	0.00065
Akap13	chr7:82600419-82899495	leanveh	dbLSDi	OK	11.7141	26.2112	1.16194	0.00065
Uvrag	chr7:106035252-106289654	leanveh	dbLSDi	OK	12.033	29.193	1.27862	0.00065
Ube2g2	chr10:77085065-77108735	leanveh	dbLSDi	OK	39.2996	86.4421	1.13722	0.00065
Cldn3	chr5:135462083-135477220	leanveh	dbLSDi	OK	78.538	2.92421	-4.74727	0.00065
Hbb-b1	chr7:110961037-110962437	leanveh	dbLSDi	OK	188.363	1123.85	2.57687	0.0007
Msr1	chr8:40667053-40728032	leanveh	dbLSDi	OK	2.88509	19.0492	2.72304	0.0007
Arhgap30	chr1:173319090-173340370	leanveh	dbLSDi	OK	4.90474	18.6098	1.92382	0.0007
Plau	chr14:21655883-21662610	leanveh	dbLSDi	OK	48.1719	112.467	1.22324	0.0007
Slfn2	chr11:82878613-82884180	leanveh	dbLSDi	OK	13.2345	47.9056	1.85589	0.0007
Ncf1	chr5:134696129-134705495	leanveh	dbLSDi	OK	6.9266	23.2529	1.74719	0.0007
Fcgr2b	chr1:172890688-172906202	leanveh	dbLSDi	OK	22.9781	65.9517	1.52115	0.0007
Aco1	chr4:40090297-40146042	leanveh	dbLSDi	OK	77.7873	35.1966	-1.1441	0.0007
Irs3	chr5:138084259-138086942	leanveh	dbLSDi	OK	13.1682	42.0858	1.67628	0.0007
Col1a1	chr11:94797583-94813170	leanveh	dbLSDi	OK	63.1211	157.856	1.32241	0.00075
Lilrb3	chr7:3664106-3671984	leanveh	dbLSDi	OK	5.6013	28.9357	2.36902	0.00075
Cyp2d22	chr15:82200956-82210690	leanveh	dbLSDi	OK	14.7456	39.5625	1.42385	0.00075
Lbp	chr2:158132228-158158588	leanveh	dbLSDi	OK	97.2227	290.068	1.57702	0.00075
Pik3r5	chr11:68245626-68311348	leanveh	dbLSDi	OK	3.469	19.9871	2.52648	0.0008
Man1c1	chr4:134117604-134260205	leanveh	dbLSDi	OK	7.11404	17.602	1.307	0.0008
Tmem64	chr4:15192966-15213900	leanveh	dbLSDi	OK	53.1818	11.5019	-2.20906	0.0008
Rab31	chr17:66001065-66122092	leanveh	dbLSDi	OK	17.3726	44.717	1.36401	0.0008
Clec4a1	chr6:122871865-122884637	leanveh	dbLSDi	OK	7.85227	30.0714	1.93721	0.0008
Pde4dip	chr3:97493751-97692630	leanveh	dbLSDi	OK	17.0632	6.65141	-1.35916	0.0008
Gsto1	chr19:47929478-47939278	leanveh	dbLSDi	OK	66.335	152.436	1.20036	0.0008
Wipi1	chr11:109434834-109472703	leanveh	dbLSDi	OK	14.8961	42.9573	1.52797	0.0008
Csdc2	chr15:81767188-81781371	leanveh	dbLSDi	OK	7.0936	1.10167	-2.68683	0.0008
Ccr5	chr9:124036281-124041922	leanveh	dbLSDi	OK	3.97437	16.2247	2.0294	0.00085
Dnase2a	chr8:87432522-87435360	leanveh	dbLSDi	OK	11.7774	36.8482	1.64558	0.00085
Il6ra	chr3:89673245-89717084	leanveh	dbLSDi	OK	8.35711	23.7237	1.50525	0.00085
Txndc16	chr14:45754122-45839069	leanveh	dbLSDi	OK	23.2195	8.01835	-1.53396	0.00085
Eya2	chr2:165480797-165597131	leanveh	dbLSDi	OK	5.05352	19.5742	1.9536	0.00085
Fbp1	chr13:62966112-62989596	leanveh	dbLSDi	OK	45.48	11.5182	-1.98131	0.00085
Colec12	chr18:9707645-9877993	leanveh	dbLSDi	OK	10.342	30.5852	1.56431	0.0009
Metrnl	chr11:121563740-121578703	leanveh	dbLSDi	OK	8.21901	25.6077	1.63954	0.0009
Folr2	chr7:108988501-109005708	leanveh	dbLSDi	OK	18.2785	62.0092	1.76234	0.0009
Srpx2	chrX:130442964-130466989	leanveh	dbLSDi	OK	6.76429	23.4531	1.79377	0.0009
Slc12a2	chr18:58038331-58106475	leanveh	dbLSDi	OK	14.1945	6.11486	-1.21494	0.0009
Blvra	chr2:126896392-126922820	leanveh	dbLSDi	OK	37.4392	101.033	1.43221	0.0009
Ly9	chr1:173518743-173537491	leanveh	dbLSDi	OK	1.83476	10.1832	2.47252	0.0009
Hoxb8	chr11:96143218-96146639	leanveh	dbLSDi	OK	24.619	5.35388	-2.20111	0.0009
Ccdc120	chrX:7308839-7318450	leanveh	dbLSDi	OK	3.27542	0.588011	-2.47777	0.0009
Bcar3	chr3:122122697-122233100	leanveh	dbLSDi	OK	39.8165	91.454	1.19968	0.0009
Sdc3	chr4:130348451-130382233	leanveh	dbLSDi	OK	24.854	54.7359	1.13901	0.00095
Mmp2	chr8:95351226-95377319	leanveh	dbLSDi	OK	27.2398	62.2283	1.19185	0.00095
Col6a1	chr10:76171536-76188789	leanveh	dbLSDi	OK	66.4359	180.876	1.44496	0.00095
Tmed5	chr5:108550665-108561610	leanveh	dbLSDi	OK	28.314	65.1109	1.20138	0.00095
Mtap6	chr7:106415956-106485647	leanveh	dbLSDi	OK	6.61739	28.1234	2.08744	0.00095
Ctxn1	chr8:4257645-4259274	leanveh	dbLSDi	OK	15.9985	2.69027	-2.57212	0.00095
Tubb2a	chr13:34166146-34169877	leanveh	dbLSDi	OK	17.7578	50.1067	1.49655	0.001
Unc93b1	chr19:3935185-3949340	leanveh	dbLSDi	OK	43.2251	98.0141	1.18112	0.001
Pgap2	chr7:109371587-109386265	leanveh	dbLSDi	OK	75.4555	20.8961	-1.85239	0.001
Ptgs1	chr2:36085945-36107789	leanveh	dbLSDi	OK	21.2197	6.34878	-1.74086	0.001
Pkp2	chr16:16213437-16272805	leanveh	dbLSDi	OK	27.4573	63.0936	1.2003	0.001
Chst12	chr5:140981562-141001192	leanveh	dbLSDi	OK	43.3085	95.2277	1.13673	0.001
Cd1d1	chr3:86799757-86803262	leanveh	dbLSDi	OK	105.486	238.879	1.17923	0.001
Slc12a3	chr8:96853107-96890121	leanveh	dbLSDi	OK	1.82517	0.10057	-4.18175	0.001
Zim1	chr7:6628153-6649143	leanveh	dbLSDi	OK	1.20665	7.13827	2.56457	0.00105
Scarb2	chr5:92872898-92934634	leanveh	dbLSDi	OK	31.5626	70.1295	1.1518	0.00105
Ccl11	chr11:81871333-81876457	leanveh	dbLSDi	OK	27.5414	94.1212	1.77292	0.00105
Lhfpl2	chr13:94827750-94965364	leanveh	dbLSDi	OK	31.9011	74.0294	1.21449	0.00105
Prtn3	chr10:79342411-79345917	leanveh	dbLSDi	OK	25.1032	4.21293	-2.57497	0.00105
Pkdcc	chr17:83614622-83624409	leanveh	dbLSDi	OK	31.8826	11.1082	-1.52115	0.00105
Slc6a9	chr4:117507862-117545075	leanveh	dbLSDi	OK	12.2112	2.81093	-2.11909	0.00105
Prps2	chrX:163784264-163820631	leanveh	dbLSDi	OK	30.6778	9.79872	-1.64653	0.00105
Fgfrl1	chr5:109123247-109135969	leanveh	dbLSDi	OK	93.1241	219.354	1.23603	0.00105
Acta1	chr8:126415666-126418636	leanveh	dbLSDi	OK	7.68782	84.6069	3.46013	0.0011
Dusp3	chr11:101832457-101846105	leanveh	dbLSDi	OK	42.3103	96.5389	1.1901	0.0011
Lgr4	chr2:109757803-109854414	leanveh	dbLSDi	OK	15.3526	34.7543	1.1787	0.0011
Degs1	chr1:184205900-184212890	leanveh	dbLSDi	OK	87.0046	190.398	1.12986	0.0011
Ddah1	chr3:145421655-145557241	leanveh	dbLSDi	OK	14.4377	4.65134	-1.63413	0.0011
Doc2b	chr11:75582591-75609559	leanveh	dbLSDi	OK	2.73283	10.7598	1.97718	0.0011
Grap	chr11:61466822-61486279	leanveh	dbLSDi	OK	15.1954	52.8144	1.79729	0.00115
F2r	chr13:96371743-96388388	leanveh	dbLSDi	OK	7.22738	24.427	1.75693	0.00115
Bri3bp	chr5:125921937-125941255	leanveh	dbLSDi	OK	8.59033	1.92083	-2.16098	0.00115
2210403K04Rik	chr11:75275040-75280192	leanveh	dbLSDi	OK	29.4579	70.9132	1.2674	0.00115
Bcl2l13	chr6:120786247-120842860	leanveh	dbLSDi	OK	14.3764	31.5006	1.13168	0.00115
Hebp1	chr6:135087536-135118233	leanveh	dbLSDi	OK	105.683	240.813	1.18818	0.0012
Nrgn	chr9:37352077-37360330	leanveh	dbLSDi	OK	39.501	5.35112	-2.88397	0.0012
Capn2	chr1:184397389-184447614	leanveh	dbLSDi	OK	58.9913	136.646	1.21186	0.0012
Hsd11b1	chr1:195047834-195090239	leanveh	dbLSDi	OK	97.84	212.459	1.11869	0.0012
Rnf180	chr13:105937573-106083094	leanveh	dbLSDi	OK	3.69719	0.654631	-2.49768	0.00125
Cth	chr3:157557211-157588027	leanveh	dbLSDi	OK	16.0291	2.57588	-2.63756	0.00125
1100001G20Rik	chr11:83560441-83566148	leanveh	dbLSDi	OK	80.2832	258.512	1.68706	0.0013
Bmp3	chr5:99283457-99309979	leanveh	dbLSDi	OK	4.73334	20.4171	2.10885	0.0013
Synpo2	chr3:122779436-122939067	leanveh	dbLSDi	OK	14.0682	35.058	1.3173	0.0013
S100b	chr10:75716580-75724064	leanveh	dbLSDi	OK	1.6006	8.75782	2.45196	0.0013
Gp49a	chr10:51200484-51206025	leanveh	dbLSDi	OK	8.18876	83.3144	3.34685	0.00135
Alad	chr4:62170203-62181097	leanveh	dbLSDi	OK	56.0714	16.6242	-1.75398	0.00135
P2rx4	chr5:123157565-123179051	leanveh	dbLSDi	OK	26.9396	65.1723	1.27453	0.00135
Tsku	chr7:105499177-105509838	leanveh	dbLSDi	OK	9.84953	33.1597	1.7513	0.00135
H2-Eb1	chr17:34442811-34453619	leanveh	dbLSDi	OK	172.299	75.5004	-1.19036	0.00135
Fam83f	chr15:80502276-80530855	leanveh	dbLSDi	OK	1.3998	7.60884	2.44246	0.00135
Deptor	chr15:54931471-55085757	leanveh	dbLSDi	OK	12.7005	37.3442	1.556	0.0014
Efhd1	chr1:89160938-89207366	leanveh	dbLSDi	OK	41.1916	9.66215	-2.09194	0.0014
Myo5b	chr18:74602272-74931131	leanveh	dbLSDi	OK	10.7716	3.31832	-1.69871	0.0014
Ston2	chr12:92871448-93024876	leanveh	dbLSDi	OK	3.55221	0.513159	-2.79124	0.0014
Dennd4a	chr9:64658817-64767474	leanveh	dbLSDi	OK	4.21081	10.5838	1.32969	0.0014
Gstt3	chr10:75236866-75244159	leanveh	dbLSDi	OK	21.6381	5.98198	-1.85488	0.0014
Prm2	chr16:10791473-10792190	leanveh	dbLSDi	OK	706.448	104.734	-2.75385	0.0014
Ttyh2	chr11:114536781-114582298	leanveh	dbLSDi	OK	21.3455	47.1967	1.14476	0.00145
Slc6a6	chr6:91634060-91709057	leanveh	dbLSDi	OK	35.612	98.8474	1.47284	0.00145
Nnt	chr13:120123123-120197945	leanveh	dbLSDi	OK	16.7062	5.47565	-1.60928	0.00145
Tmem106a	chr11:101443555-101453099	leanveh	dbLSDi	OK	22.3169	51.4684	1.20555	0.0015
Pid1	chr1:84032867-84281220	leanveh	dbLSDi	OK	23.0883	56.1441	1.28197	0.0015
Maoa	chrX:16196823-16264938	leanveh	dbLSDi	OK	9.78823	24.93	1.34877	0.0015
Hunk	chr16:90386641-90499798	leanveh	dbLSDi	OK	5.25271	0.868285	-2.59682	0.0015
Lrrc59	chr11:94491137-94515068	leanveh	dbLSDi	OK	59.5526	133.414	1.16367	0.0015
Limch1	chr5:67137078-67448398	leanveh	dbLSDi	OK	8.05126	18.7274	1.21786	0.0016
Esd	chr14:75132151-75150250	leanveh	dbLSDi	OK	69.2477	161.619	1.22275	0.0016
Mt1	chr8:96702988-96704227	leanveh	dbLSDi	OK	558.78	1232.04	1.1407	0.0016
Mafk	chr5:140267489-140278606	leanveh	dbLSDi	OK	18.1473	42.1538	1.21591	0.0016
Cd300lb	chr11:114784094-114795700	leanveh	dbLSDi	OK	2.52653	17.8953	2.82435	0.00165
Adssl1	chr12:113858257-113879566	leanveh	dbLSDi	OK	4.36784	33.2964	2.93037	0.00165
Atp6v1a	chr16:44085516-44139132	leanveh	dbLSDi	OK	30.9103	64.4335	1.05972	0.00165
Mfsd1	chr3:67386689-67408153	leanveh	dbLSDi	OK	32.4032	68.5213	1.08042	0.00165
Plk2	chr13:111185251-111191051	leanveh	dbLSDi	OK	13.3163	32.8277	1.30172	0.00165
Isyna1	chr8:73118379-73121189	leanveh	dbLSDi	OK	62.3591	23.0295	-1.43712	0.00165
Rnasel	chr1:155596555-155611351	leanveh	dbLSDi	OK	10.7998	25.8462	1.25895	0.00165
Csf2rb2	chr15:78112939-78136033	leanveh	dbLSDi	OK	4.5395	13.9498	1.61964	0.00165
Gm7444	chr9:55875442-55879380	leanveh	dbLSDi	OK	11.9946	1.95646	-2.61607	0.00165
Rorc	chr3:94176747-94202161	leanveh	dbLSDi	OK	14.7752	4.24217	-1.8003	0.00165
Sox7	chr14:64562542-64569569	leanveh	dbLSDi	OK	21.3185	7.94652	-1.42371	0.0017
Trpm3	chr19:22213606-23064374	leanveh	dbLSDi	OK	3.50716	0.733432	-2.25757	0.0017
Tmem182	chr1:40862445-40912112	leanveh	dbLSDi	OK	36.5378	100.685	1.46239	0.0017
Slc37a4	chr9:44206258-44211048	leanveh	dbLSDi	OK	31.0411	11.9857	-1.37287	0.0017
Iqgap1	chr7:87856468-87948217	leanveh	dbLSDi	OK	22.7833	47.2029	1.0509	0.00175
Aspg	chr12:113344893-113365784	leanveh	dbLSDi	OK	23.1242	2.79639	-3.04777	0.00175
AF251705	chr11:114858082-114863194	leanveh	dbLSDi	OK	4.08875	21.0998	2.3675	0.00175
Tgm2	chr2:157942140-157972128	leanveh	dbLSDi	OK	95.9265	296.229	1.62671	0.00175
Hpse	chr5:101108504-101148702	leanveh	dbLSDi	OK	1.67464	9.99135	2.57683	0.00175
Atp13a4	chr16:29396123-29544950	leanveh	dbLSDi	OK	7.03158	0.0687125	-6.67713	0.00185
Cib2	chr9:54393158-54407886	leanveh	dbLSDi	OK	83.8186	200.8	1.26042	0.00185
Tmem184a	chr5:140280905-140290237	leanveh	dbLSDi	OK	25.5975	4.36153	-2.55309	0.00185
Mlph	chr1:92811676-92847719	leanveh	dbLSDi	OK	21.0167	2.16408	-3.27971	0.0019
Fgfr2	chr7:137305964-137410322	leanveh	dbLSDi	OK	9.27475	1.70408	-2.44432	0.0019
Col16a1	chr4:129725083-129776521	leanveh	dbLSDi	OK	9.53238	21.2661	1.15765	0.0019
Slc6a13	chr6:121250313-121287736	leanveh	dbLSDi	OK	21.384	54.3449	1.34561	0.00195
Abcb4	chr5:8893720-8959226	leanveh	dbLSDi	OK	0.849887	4.15296	2.2888	0.00195
F630110N24Rik	chr10:80820314-80828565	leanveh	dbLSDi	OK	11.1404	35.9537	1.69034	0.002
Mup11	chr4:60591132-60675267	leanveh	dbLSDi	OK	9.69754	0.12957	-6.22581	0.002
Ms4a6d	chr19:11661095-11679294	leanveh	dbLSDi	OK	5.33891	32.7977	2.61898	0.00205
Arhgef6	chrX:54484661-54591906	leanveh	dbLSDi	OK	6.99825	18.9149	1.43446	0.00205
Sgpp1	chr12:76815234-76836716	leanveh	dbLSDi	OK	76.9682	18.6832	-2.04252	0.00205
Gng2	chr14:20691780-20796471	leanveh	dbLSDi	OK	6.633	17.4417	1.39481	0.0021
Ccr1	chr9:123876958-123883525	leanveh	dbLSDi	OK	2.97651	25.4377	3.09527	0.0021
Celsr3	chr9:108728650-108755300	leanveh	dbLSDi	OK	0.217071	1.0422	2.26339	0.0021
Pamr1	chr2:102390177-102483197	leanveh	dbLSDi	OK	3.6846	12.3346	1.74313	0.0021
Pebp1	chr5:117732659-117737573	leanveh	dbLSDi	OK	291.291	122.466	-1.25007	0.00215
Bst1	chr5:44210131-44234707	leanveh	dbLSDi	OK	2.60697	15.1278	2.53676	0.00215
Akirin1	chr4:123412437-123427542	leanveh	dbLSDi	OK	24.5413	53.0962	1.11339	0.00215
Htatip2	chr7:57014475-57029369	leanveh	dbLSDi	OK	28.876	81.819	1.50256	0.00215
Specc1	chr11:61890598-62036515	leanveh	dbLSDi	OK	2.8527	8.73945	1.61522	0.00215
Ric3	chr7:116154393-116226838	leanveh	dbLSDi	OK	4.87266	13.7389	1.49548	0.00215
Napsa	chr7:51827814-51842216	leanveh	dbLSDi	OK	40.083	10.3197	-1.9576	0.00225
Car2	chr3:14886425-14900770	leanveh	dbLSDi	OK	47.3367	14.1716	-1.73996	0.00225
Ptafr	chr4:132119981-132136781	leanveh	dbLSDi	OK	4.23097	28.8393	2.76897	0.00225
Ss18l1	chr2:179777187-179804906	leanveh	dbLSDi	OK	11.0241	2.87933	-1.93686	0.00225
Amhr2	chr15:102275797-102285070	leanveh	dbLSDi	OK	44.7093	10.5309	-2.08595	0.0023
Gla	chrX:131122707-131135544	leanveh	dbLSDi	OK	4.12148	14.9862	1.8624	0.0023
Got2	chr8:98388036-98412265	leanveh	dbLSDi	OK	69.8855	24.0581	-1.53847	0.0023
Ap2a2	chr7:148748078-148818910	leanveh	dbLSDi	OK	39.7812	84.5864	1.08834	0.00235
Hba-a1_dup1	chr11:32183671-32184493	leanveh	dbLSDi	OK	910.116	3164.98	1.79807	0.0024
Inpp5d	chr1:89516886-89617083	leanveh	dbLSDi	OK	5.75302	17.8722	1.63533	0.0024
Pfn2	chr3:57645816-57651679	leanveh	dbLSDi	OK	30.9679	10.6356	-1.54187	0.0024
Fbp2	chr13:62938244-62959730	leanveh	dbLSDi	OK	9.46198	1.99614	-2.24493	0.0024
Slc16a11	chr11:70027411-70029916	leanveh	dbLSDi	OK	14.2582	2.60155	-2.45435	0.0024
Slc7a6	chr8:108692774-108722604	leanveh	dbLSDi	OK	10.1503	23.785	1.22853	0.0024
Wwtr1	chr3:57259565-57379832	leanveh	dbLSDi	OK	30.5101	63.6113	1.05999	0.0024
Mthfd2	chr6:83255697-83267598	leanveh	dbLSDi	OK	26.1237	6.51128	-2.00434	0.00245
C1qtnf1	chr11:118289770-118313096	leanveh	dbLSDi	OK	30.5501	64.9393	1.08792	0.00245
Slc1a1	chr19:28909655-28988450	leanveh	dbLSDi	OK	15.971	3.91421	-2.02866	0.0025
Hspb6	chr7:31338320-31340458	leanveh	dbLSDi	OK	17.8666	55.0116	1.62247	0.0025
Fmr1	chrX:65931729-65971136	leanveh	dbLSDi	OK	44.1088	116.034	1.39541	0.00255
Fam70a	chrX:35550477-35605658	leanveh	dbLSDi	OK	5.17219	1.04662	-2.30503	0.00255
Mest	chr6:30688062-30846760	leanveh	dbLSDi	OK	207.837	604.57	1.54046	0.0026
Cmpk1	chr4:114633217-114659833	leanveh	dbLSDi	OK	46.4187	95.4458	1.03997	0.0026
Plekha2	chr8:26149616-26212283	leanveh	dbLSDi	OK	10.9291	24.8455	1.18481	0.0026
Galnt6	chr15:100520345-100559807	leanveh	dbLSDi	OK	0.688074	8.68977	3.65868	0.00265
Scn1b	chr7:31901542-31911964	leanveh	dbLSDi	OK	23.1455	60.9976	1.39802	0.00265
Lyve1	chr7:117994120-118006467	leanveh	dbLSDi	OK	10.1962	31.7735	1.63979	0.0027
Fam164c	chr12:86629540-86640308	leanveh	dbLSDi	OK	4.34278	0.917623	-2.24264	0.0027
Pld4	chr12:113998865-114007197	leanveh	dbLSDi	OK	14.6294	37.58	1.3611	0.0027
Tlr8	chrX:163680663-163701720	leanveh	dbLSDi	OK	1.57055	8.05474	2.35857	0.00275
Col5a2	chr1:45431175-45560127	leanveh	dbLSDi	OK	18.7719	41.3797	1.14035	0.00275
Ncf2	chr1:154655019-154684120	leanveh	dbLSDi	OK	6.55292	26.9112	2.038	0.00275
Osgin1	chr8:121961061-121970156	leanveh	dbLSDi	OK	29.49	63.4698	1.10584	0.00275
Synm	chr7:74875046-74904628	leanveh	dbLSDi	OK	9.52196	3.29122	-1.53264	0.00275
BC051019	chr7:116847250-116867285	leanveh	dbLSDi	OK	2.45366	0.044707	-5.77829	0.00275
Gm10267	chr18:44316057-44318957	leanveh	dbLSDi	OK	5.69795	0	#NAME?	0.00275
Cyp4b1	chr4:115297332-115320310	leanveh	dbLSDi	OK	43.3042	97.3595	1.16882	0.00275
Tmem37	chr1:121963953-121970357	leanveh	dbLSDi	OK	31.7408	79.0694	1.31678	0.00275
Pgap3	chr11:98249985-98261804	leanveh	dbLSDi	OK	6.96258	1.32072	-2.3983	0.00275
Palmd	chr3:116621179-116687324	leanveh	dbLSDi	OK	72.6082	156.882	1.11147	0.00275
Evpl	chr11:116081872-116099405	leanveh	dbLSDi	OK	1.84935	0.390569	-2.24337	0.0028
Col5a1	chr2:27741944-27895030	leanveh	dbLSDi	OK	29.0905	64.9007	1.15769	0.00285
Pdzk1	chr3:96633748-96674849	leanveh	dbLSDi	OK	31.7095	6.89396	-2.20151	0.00285
Plxnb1	chr9:108997949-109022429	leanveh	dbLSDi	OK	8.71473	1.07256	-3.0224	0.00285
Pde1b	chr15:103333728-103360483	leanveh	dbLSDi	OK	6.62443	18.338	1.46897	0.00285
Fads1	chr19:10257377-10271362	leanveh	dbLSDi	OK	56.0315	25.7737	-1.12034	0.0029
Fbxo10	chr4:45047119-45097476	leanveh	dbLSDi	OK	15.4409	3.52006	-2.13308	0.0029
Pabpc2	chr18:39933150-39935736	leanveh	dbLSDi	OK	26.6738	6.91891	-1.94681	0.0029
Ston1	chr17:89025894-89045064	leanveh	dbLSDi	OK	6.07266	16.5944	1.4503	0.0029
Elovl2	chr13:41277750-41315772	leanveh	dbLSDi	OK	15.7922	2.48752	-2.66643	0.00295
Arhgdib	chr6:136872229-136890238	leanveh	dbLSDi	OK	29.0412	73.6078	1.34176	0.00295
Acat2	chr17:13135907-13153591	leanveh	dbLSDi	OK	36.3799	13.7891	-1.39962	0.00295
Fermt3	chr19:7070620-7093959	leanveh	dbLSDi	OK	5.04819	20.7461	2.039	0.003
Stambpl1	chr19:34266759-34314818	leanveh	dbLSDi	OK	5.78284	18.5729	1.68335	0.003
Fndc5	chr4:128814303-128821837	leanveh	dbLSDi	OK	10.8402	2.09017	-2.3747	0.003
Hcls1	chr16:36935068-36963300	leanveh	dbLSDi	OK	14.9565	38.3231	1.35744	0.00305
Defb10	chr8:22969372-22972482	leanveh	dbLSDi	OK	3.54636	0	#NAME?	0.00305
S100a11	chr3:93324417-93330210	leanveh	dbLSDi	OK	667.008	1347.17	1.01415	0.00305
Mum1l1	chrX:135744582-135772874	leanveh	dbLSDi	OK	29.3134	1.4215	-4.36608	0.00315
Cyba	chr8:124948670-124956840	leanveh	dbLSDi	OK	52.7821	133.727	1.34117	0.0032
Cfp	chrX:20502660-20508650	leanveh	dbLSDi	OK	15.2616	44.2574	1.53601	0.0032
Slc43a2	chr11:75345195-75391074	leanveh	dbLSDi	OK	12.1959	27.7284	1.18497	0.0032
Pltp	chr2:164656229-164683208	leanveh	dbLSDi	OK	43.8177	208.486	2.25036	0.0032
Dpp4	chr2:62168129-62250288	leanveh	dbLSDi	OK	7.51591	2.29793	-1.70961	0.0032
Cln8	chr8:14888535-14901719	leanveh	dbLSDi	OK	4.75374	12.6134	1.40782	0.00325
Parva	chr7:119571219-119735202	leanveh	dbLSDi	OK	42.7372	86.5185	1.01752	0.00325
Mtap7d1	chr4:125909411-125933563	leanveh	dbLSDi	OK	43.2597	92.631	1.09847	0.0033
Spag1	chr15:36109284-36164932	leanveh	dbLSDi	OK	4.23879	0.980009	-2.11279	0.0033
Ell2	chr13:75844931-75909806	leanveh	dbLSDi	OK	19.9706	41.7118	1.06258	0.0033
Ednrb	chr14:104213841-104243390	leanveh	dbLSDi	OK	12.9938	30.5565	1.23365	0.0033
Gm10804	chr2:93259268-93310031	leanveh	dbLSDi	OK	1.58162	0.0734132	-4.42922	0.0033
4930471M23Rik	chr5:30950311-30962102	leanveh	dbLSDi	OK	12.5402	29.2657	1.22265	0.00335
Mfge8	chr7:86278653-86293946	leanveh	dbLSDi	OK	200.199	1153.12	2.52603	0.00335
Gprasp1	chrX:132277230-132338007	leanveh	dbLSDi	OK	11.5244	3.06285	-1.91174	0.00335
Acot1	chr12:85350451-85358619	leanveh	dbLSDi	OK	9.60061	2.04497	-2.23105	0.00335
Acpp	chr9:104190569-104240052	leanveh	dbLSDi	OK	6.38339	1.29804	-2.29799	0.0034
Litaf	chr16:10959365-10993214	leanveh	dbLSDi	OK	35.2885	71.3516	1.01575	0.0034
Cd53	chr3:106561778-106593067	leanveh	dbLSDi	OK	5.65506	21.5512	1.93015	0.00345
Unc79	chr12:104187068-104422207	leanveh	dbLSDi	OK	0.315697	1.51272	2.26053	0.00345
Ngfrap1	chrX:132804791-132806517	leanveh	dbLSDi	OK	61.58	16.6842	-1.88398	0.0035
Cd209b	chr8:3917656-3926814	leanveh	dbLSDi	OK	2.55423	11.499	2.17055	0.0035
Cacna1e	chr1:156239648-156573050	leanveh	dbLSDi	OK	0.429271	2.27604	2.40657	0.0035
Clec7a	chr6:129411608-129422795	leanveh	dbLSDi	OK	5.85022	20.2311	1.79001	0.00355
2310016C08Rik	chr6:29222487-29225449	leanveh	dbLSDi	OK	13.785	57.1563	2.05181	0.00355
Dbp	chr7:52960616-52973372	leanveh	dbLSDi	OK	99.6468	37.1131	-1.4249	0.00355
Aifm2	chr10:61178010-61246612	leanveh	dbLSDi	OK	88.2664	206.022	1.22287	0.00355
Ctsd	chr7:149561820-149573775	leanveh	dbLSDi	OK	480.189	2222.44	2.21047	0.0036
Igf1r	chr7:75097142-75378553	leanveh	dbLSDi	OK	7.54934	3.15808	-1.2573	0.0036
Sorbs2	chr8:46593141-46913260	leanveh	dbLSDi	OK	9.94148	3.56185	-1.48083	0.0036
Arpc1b	chr5:145875124-145889055	leanveh	dbLSDi	OK	157.847	324.239	1.03853	0.00365
1300014I06Rik	chr13:34719709-34744550	leanveh	dbLSDi	OK	20.3367	45.1667	1.15117	0.00365
Mbnl2	chr14:120674890-120830920	leanveh	dbLSDi	OK	38.1866	77.7925	1.02656	0.0037
Lamc3	chr2:31742800-31802055	leanveh	dbLSDi	OK	7.67636	2.85931	-1.42475	0.0037
Kif5c	chr2:49474833-49630298	leanveh	dbLSDi	OK	1.67558	0.390053	-2.10291	0.0037
Aplnr	chr2:84976516-84980080	leanveh	dbLSDi	OK	14.7783	4.01496	-1.88003	0.0037
Rasa4	chr5:136559785-136587730	leanveh	dbLSDi	OK	12.359	28.1076	1.1854	0.0037
Gm14420	chr2:177249446-177263899	leanveh	dbLSDi	OK	14.0757	30.4787	1.1146	0.00375
Per3	chr4:150377763-150418731	leanveh	dbLSDi	OK	18.8297	8.59713	-1.13108	0.0038
Rab11fip4	chr11:79404713-79507514	leanveh	dbLSDi	OK	6.97529	1.38172	-2.33579	0.0038
Trp53inp2	chr2:155207591-155215583	leanveh	dbLSDi	OK	158.487	556.435	1.81185	0.0038
D0H4S114	chr18:33596672-33623683	leanveh	dbLSDi	OK	31.736	11.4177	-1.47485	0.00385
Pi4k2a	chr19:42164924-42196708	leanveh	dbLSDi	OK	17.2735	35.5279	1.04039	0.00385
Tuba3b	chr6:145564482-145569997	leanveh	dbLSDi	OK	71.9554	19.6338	-1.87376	0.00385
Spink12	chr18:44264176-44268197	leanveh	dbLSDi	OK	1.10442	0	#NAME?	0.00385
9030425E11Rik	chr9:40494046-40592129	leanveh	dbLSDi	OK	8.54303	25.5447	1.58021	0.0039
Cd274	chr19:29441927-29462584	leanveh	dbLSDi	OK	7.1649	17.6686	1.30217	0.00395
Strbp	chr2:37425387-37502805	leanveh	dbLSDi	OK	2.56682	0.747616	-1.77962	0.00395
Defb18	chr1:18226553-18227524	leanveh	dbLSDi	OK	1.82465	0	#NAME?	0.00395
2310001A20Rik	chr2:150408816-150434259	leanveh	dbLSDi	OK	64.3532	126.88	0.979384	0.00395
Fosl2	chr5:32438844-32460212	leanveh	dbLSDi	OK	11.0102	23.8151	1.11303	0.004
Cd82	chr2:93259268-93310031	leanveh	dbLSDi	OK	45.5575	18.0752	-1.33367	0.00405
Slc40a1	chr1:45964914-45982439	leanveh	dbLSDi	OK	8.64487	21.0208	1.2819	0.00415
Plod1	chr4:147283861-147310885	leanveh	dbLSDi	OK	22.088	44.82	1.02088	0.00415
Pygb	chr2:150612531-150657484	leanveh	dbLSDi	OK	117.776	54.4426	-1.11324	0.00415
4933411K20Rik	chr8:47254909-47280944	leanveh	dbLSDi	OK	16.1408	6.1049	-1.40267	0.0042
Bcap31	chrX:70931521-70961514	leanveh	dbLSDi	OK	131.882	264.522	1.00414	0.0042
Zc3h12a	chr4:124795657-124805125	leanveh	dbLSDi	OK	4.08514	13.2966	1.7026	0.00425
Apod	chr16:31296277-31314682	leanveh	dbLSDi	OK	10.6655	30.0192	1.49293	0.0043
Olfm1	chr2:28048612-28086256	leanveh	dbLSDi	OK	36.5954	88.2753	1.27035	0.0043
Itih5	chr2:10075169-10178156	leanveh	dbLSDi	OK	61.0006	176.519	1.53293	0.0043
Dap	chr15:31154139-31204093	leanveh	dbLSDi	OK	128.034	262.211	1.0342	0.0043
Plekha6	chr1:135142673-135200012	leanveh	dbLSDi	OK	11.3403	3.90466	-1.5382	0.00435
Nav2	chr7:56214442-56865458	leanveh	dbLSDi	OK	4.9933	1.77866	-1.4892	0.00435
Ifrd1	chr12:40929715-40949776	leanveh	dbLSDi	OK	49.5728	96.0266	0.953884	0.00435
Gjb2	chr14:57717438-57723539	leanveh	dbLSDi	OK	2.39414	10.7506	2.16683	0.00435
Creld1	chr6:113433562-113443332	leanveh	dbLSDi	OK	32.8239	63.9184	0.961485	0.00435
Dctn3	chr4:41661829-41670195	leanveh	dbLSDi	OK	60.0909	126.942	1.07895	0.0044
Fgl2	chr5:20798778-20930495	leanveh	dbLSDi	OK	17.2474	6.52725	-1.40183	0.0044
Rap1b	chr10:117251652-117283030	leanveh	dbLSDi	OK	70.399	138.427	0.975494	0.00445
Mgat3	chr15:80004150-80045949	leanveh	dbLSDi	OK	7.27019	1.31258	-2.46958	0.00445
Rragc	chr4:123594675-123614240	leanveh	dbLSDi	OK	65.996	129.033	0.967287	0.00445
Epb4.1	chr4:131479340-131631228	leanveh	dbLSDi	OK	18.7309	37.6926	1.00886	0.00445
Pf4	chr5:91201460-91202409	leanveh	dbLSDi	OK	55.1679	154.57	1.48636	0.0045
Fzd6	chr15:38837825-38869736	leanveh	dbLSDi	OK	14.5893	4.40461	-1.72782	0.00455
Tmem231	chr8:114435917-114457691	leanveh	dbLSDi	OK	6.54431	1.4611	-2.16318	0.00455
Efemp1	chr11:28753204-28826743	leanveh	dbLSDi	OK	59.5833	123.668	1.05349	0.0046
Ggt5	chr10:75052125-75079713	leanveh	dbLSDi	OK	6.41509	15.2174	1.24618	0.0046
Rassf2	chr2:131818585-131855724	leanveh	dbLSDi	OK	9.94913	20.5906	1.04934	0.00465
Gns	chr10:120802145-120834301	leanveh	dbLSDi	OK	70.5948	141.389	1.00203	0.00465
Clip1	chr5:124029078-124134300	leanveh	dbLSDi	OK	14.8748	30.2491	1.02402	0.00465
Sucnr1	chr3:59885790-59891488	leanveh	dbLSDi	OK	48.3155	103.344	1.09689	0.00465
Luc7l3	chr11:94152452-94183225	leanveh	dbLSDi	OK	33.2391	15.6354	-1.08807	0.0047
Rspo1	chr4:124663673-124686343	leanveh	dbLSDi	OK	23.0301	4.05918	-2.50426	0.00475
Tctex1d4	chr4:116799417-116806557	leanveh	dbLSDi	OK	13.2104	0.64204	-4.36287	0.00485
Serpinb6a	chr13:34009786-34094663	leanveh	dbLSDi	OK	92.2821	200.727	1.12111	0.0049
Aacs	chr5:125956242-125997773	leanveh	dbLSDi	OK	67.4991	33.337	-1.01775	0.0049
Slc16a2	chrX:100892752-101017327	leanveh	dbLSDi	OK	13.7877	3.65409	-1.91579	0.00495
Slc9a3r1	chr11:115024654-115042492	leanveh	dbLSDi	OK	77.7038	26.4914	-1.55246	0.00495
5031439G07Rik	chr15:84776149-84818401	leanveh	dbLSDi	OK	12.9934	26.7388	1.04115	0.005
Fkbp5	chr17:28536039-28623057	leanveh	dbLSDi	OK	78.3242	169.07	1.11009	0.005
Pafah1b3	chr7:26080067-26082974	leanveh	dbLSDi	OK	19.7868	4.44493	-2.1543	0.005
Pip5k1c	chr10:80755716-80782719	leanveh	dbLSDi	OK	21.2872	42.6215	1.0016	0.00505
Parvb	chr15:84062472-84146039	leanveh	dbLSDi	OK	11.5239	26.1348	1.18134	0.00505
Sec24d	chr3:122970413-123068554	leanveh	dbLSDi	OK	22.0954	42.7116	0.950881	0.00505
1110008P14Rik	chr2:32234620-32237435	leanveh	dbLSDi	OK	82.1498	184.579	1.16791	0.0051
Ormdl3	chr11:98442607-98448559	leanveh	dbLSDi	OK	148.286	294.582	0.990291	0.0051
1700010I14Rik	chr17:9181197-9201184	leanveh	dbLSDi	OK	32.1664	8.42668	-1.93252	0.00515
Nomo1	chr7:53289065-53339582	leanveh	dbLSDi	OK	38.9738	75.6062	0.956001	0.00515
Fads3	chr19:10116037-10134161	leanveh	dbLSDi	OK	161.102	403.564	1.32482	0.00515
Bspry	chr4:62141100-62158332	leanveh	dbLSDi	OK	41.0276	6.68557	-2.61747	0.0052
Itfg3	chr17:26349636-26381187	leanveh	dbLSDi	OK	26.9519	54.2107	1.00819	0.00525
Tmem164	chrX:139115942-139278037	leanveh	dbLSDi	OK	20.8953	10.1451	-1.04239	0.0053
Slc25a24	chr3:108926066-108971327	leanveh	dbLSDi	OK	9.50446	23.4407	1.30234	0.00535
2900073G15Rik	chr17:71343132-71351873	leanveh	dbLSDi	OK	153.361	311.69	1.02318	0.0054
Tle2	chr10:81038276-81053590	leanveh	dbLSDi	OK	9.68188	1.98668	-2.28493	0.00545
Sema3g	chr14:32031058-32042697	leanveh	dbLSDi	OK	20.5909	40.8302	0.987628	0.00545
Hdac11	chr6:91106808-91124677	leanveh	dbLSDi	OK	25.1761	6.94857	-1.85727	0.0055
Ppp1r9a	chr6:4853319-5115661	leanveh	dbLSDi	OK	6.52584	2.72588	-1.25944	0.0055
9430023L20Rik	chr15:101114731-101121365	leanveh	dbLSDi	OK	26.303	63.2273	1.26532	0.0055
Ptpn12	chr5:20492462-20561615	leanveh	dbLSDi	OK	15.0106	31.5813	1.07309	0.0055
Slc35e2	chr4:154975524-154998864	leanveh	dbLSDi	OK	9.53115	3.96635	-1.26484	0.0055
Sh2b2	chr5:136694018-136720773	leanveh	dbLSDi	OK	18.6081	38.8686	1.06267	0.0055
Slc2a5	chr4:149493452-149518277	leanveh	dbLSDi	OK	24.2885	7.47951	-1.69926	0.00555
Akr1b8	chr6:34304163-34318454	leanveh	dbLSDi	OK	34.1486	84.8391	1.3129	0.00565
Psph	chr5:130271433-130293129	leanveh	dbLSDi	OK	27.6907	8.50962	-1.70223	0.00565
Prdx5	chr19:6981308-6984135	leanveh	dbLSDi	OK	161.455	309.11	0.93699	0.00565
Ggnbp1	chr17:27166203-27173323	leanveh	dbLSDi	OK	61.4122	17.0391	-1.84967	0.0057
Rab36	chr10:74499833-74516845	leanveh	dbLSDi	OK	4.52664	1.14033	-1.98899	0.0057
Hsd17b4	chr18:50287854-50355924	leanveh	dbLSDi	OK	103.432	211.928	1.0349	0.0058
Ttc26	chr6:38331523-38377647	leanveh	dbLSDi	OK	4.16705	1.0058	-2.05068	0.0058
Mrgpre	chr7:150964267-150970405	leanveh	dbLSDi	OK	0.891876	3.67025	2.04096	0.00585
Hsd3b1	chr3:98656119-98663717	leanveh	dbLSDi	OK	54.5395	0.159069	-8.42151	0.00585
Arfgef2	chr2:166631080-166723551	leanveh	dbLSDi	OK	11.3854	22.1627	0.960953	0.00585
Angptl4	chr17:33911844-33918520	leanveh	dbLSDi	OK	207.014	465.796	1.16997	0.0059
6330439K17Rik	chr2:144296292-144353134	leanveh	dbLSDi	OK	1.95444	0.457281	-2.09561	0.0059
Acox3	chr5:35925708-35956450	leanveh	dbLSDi	OK	56.6669	21.4404	-1.40218	0.0059
Alppl2	chr1:88983265-88986503	leanveh	dbLSDi	OK	3.5471	0.073512	-5.59252	0.00595
Csf2ra	chr19:61300304-61304321	leanveh	dbLSDi	OK	16.383	40.2442	1.29658	0.00595
Acpl2	chr9:96723761-96789841	leanveh	dbLSDi	OK	6.52302	1.33332	-2.29052	0.00595
Nog	chr11:89161951-89163873	leanveh	dbLSDi	OK	2.61389	11.5541	2.14414	0.00595
6330503K22Rik	chr7:125856124-125880532	leanveh	dbLSDi	OK	9.97752	3.79579	-1.39428	0.006
Gpr137b	chr13:13449887-13485891	leanveh	dbLSDi	OK	5.00599	17.4346	1.80022	0.00605
Klhl23	chr2:69660426-69674708	leanveh	dbLSDi	OK	7.42344	1.51222	-2.29542	0.00605
Arhgef5	chr6:43215642-43239319	leanveh	dbLSDi	OK	8.87052	3.42511	-1.37287	0.00605
Gpr137b-ps	chr13:12706332-12742662	leanveh	dbLSDi	OK	5.48175	19.6476	1.84165	0.0061
Mme	chr3:63099793-63186153	leanveh	dbLSDi	OK	30.7163	14.2303	-1.11004	0.0061
Tuba1a	chr15:98780277-98783932	leanveh	dbLSDi	OK	165.837	387.547	1.22461	0.0061
Slc38a10	chr11:119965264-120012665	leanveh	dbLSDi	OK	38.9916	74.3134	0.930459	0.0061
Hoxd4	chr2:74548100-74586328	leanveh	dbLSDi	OK	22.1436	6.22612	-1.83048	0.00615
Atp8b4	chr2:126146708-126317289	leanveh	dbLSDi	OK	0.581862	2.3794	2.03185	0.00615
2310022B05Rik	chr8:127159655-127187269	leanveh	dbLSDi	OK	19.1853	37.912	0.982655	0.00615
Agrn	chr4:155539398-155571597	leanveh	dbLSDi	OK	10.8438	5.39036	-1.00842	0.00615
Siglec1	chr2:130894955-130912501	leanveh	dbLSDi	OK	2.4092	8.58034	1.83248	0.0062
Sbsn	chr7:31536489-31541153	leanveh	dbLSDi	OK	28.4773	88.9195	1.64269	0.0062
Plod3	chr5:137458070-137472516	leanveh	dbLSDi	OK	30.5484	64.2854	1.07339	0.0062
Gm8909	chr17:36301388-36305482	leanveh	dbLSDi	OK	42.9245	89.2206	1.05558	0.0062
Serpinb8	chr1:109486582-109505555	leanveh	dbLSDi	OK	3.55758	10.1925	1.51854	0.0063
Cpt1a	chr19:3323300-3385733	leanveh	dbLSDi	OK	33.7452	63.9369	0.921968	0.00635
Scel	chr14:103912557-104012563	leanveh	dbLSDi	OK	10.6011	2.20827	-2.26323	0.0064
Dnahc8	chr17:30763880-31012209	leanveh	dbLSDi	OK	24.294	5.32809	-2.18891	0.00645
Mfap3l	chr8:63111656-63155528	leanveh	dbLSDi	OK	14.3874	5.96858	-1.26935	0.0065
Tpcn2	chr7:152439827-152469832	leanveh	dbLSDi	OK	1.70568	7.17703	2.07304	0.0065
Serpina3n	chr12:105644917-105652539	leanveh	dbLSDi	OK	161.879	931.082	2.52399	0.00655
Cdhr5	chr7:148454983-148462685	leanveh	dbLSDi	OK	11.1251	0.111327	-6.64287	0.00655
Echdc2	chr4:107838070-107851913	leanveh	dbLSDi	OK	63.6066	29.9224	-1.08795	0.0066
Gas7	chr11:67346499-67502494	leanveh	dbLSDi	OK	10.7323	22.18	1.0473	0.0067
Ankrd29	chr18:12410865-12464229	leanveh	dbLSDi	OK	9.13421	3.18947	-1.51797	0.0067
Mtap1b	chr13:100191418-100286557	leanveh	dbLSDi	OK	7.39507	3.62141	-1.03001	0.0067
Naip2	chr13:100914017-100972047	leanveh	dbLSDi	OK	1.13544	5.04187	2.15071	0.0067
Prune	chr3:95057595-95085998	leanveh	dbLSDi	OK	11.8969	26.2181	1.13997	0.0067
Pde4d	chr13:109444370-110746177	leanveh	dbLSDi	OK	2.01074	6.80528	1.75893	0.00675
Nes	chr3:87775014-87784373	leanveh	dbLSDi	OK	8.67309	3.3163	-1.38697	0.0068
Igsf5	chr16:96583363-96643728	leanveh	dbLSDi	OK	7.92542	0.110694	-6.16184	0.0068
Gyg	chr3:20021969-20054995	leanveh	dbLSDi	OK	38.5442	75.8352	0.976354	0.00685
Zfp541	chr7:16657290-16681677	leanveh	dbLSDi	OK	7.09014	1.61193	-2.13702	0.00685
Fyb	chr15:6529870-6613312	leanveh	dbLSDi	OK	4.29886	12.6005	1.55145	0.0069
Cela1	chr15:100504852-100518351	leanveh	dbLSDi	OK	8.73673	48.7527	2.48032	0.0069
Hadhb	chr5:30481861-30511123	leanveh	dbLSDi	OK	61.627	116.364	0.917004	0.0069
Aldh1a2	chr9:71063595-71144050	leanveh	dbLSDi	OK	13.6871	2.95032	-2.21387	0.00695
Zfp385b	chr2:77248688-77654873	leanveh	dbLSDi	OK	5.98131	0.91966	-2.70129	0.00695
Lrriq1	chr10:102525831-102698956	leanveh	dbLSDi	OK	1.62233	0.162818	-3.31673	0.007
Stk33	chr7:116422729-116582567	leanveh	dbLSDi	OK	10.9329	2.68011	-2.02831	0.007
Slc34a1	chr13:55501008-55516593	leanveh	dbLSDi	OK	17.6788	1.31872	-3.7448	0.00705
Osbpl11	chr16:33185156-33243398	leanveh	dbLSDi	OK	29.2642	54.7098	0.902659	0.00705
Mfap5	chr6:122463693-122479305	leanveh	dbLSDi	OK	28.077	67.179	1.25862	0.0071
Enc1	chr13:98011059-98022995	leanveh	dbLSDi	OK	15.2187	29.1079	0.935566	0.0071
St8sia4	chr1:97484258-97564171	leanveh	dbLSDi	OK	3.67246	9.3219	1.34388	0.00715
Clgn	chr8:85913789-85950728	leanveh	dbLSDi	OK	34.4108	10.0895	-1.77	0.00715
Arhgef4	chr1:34858566-34869599	leanveh	dbLSDi	OK	7.52157	1.69836	-2.14689	0.0072
Itpk1	chr12:103806792-103943079	leanveh	dbLSDi	OK	20.3522	41.3744	1.02355	0.0072
Gm70	chr12:77518585-77540478	leanveh	dbLSDi	OK	15.8341	4.20909	-1.91146	0.00725
Fos	chr12:86814850-86818219	leanveh	dbLSDi	OK	8.66097	31.2909	1.85314	0.00725
Cald1	chr6:34659443-34725469	leanveh	dbLSDi	OK	45.0197	89.0086	0.983389	0.00725
Rbms1	chr2:60590009-60801261	leanveh	dbLSDi	OK	20.9577	45.3222	1.11274	0.00725
Ccdc96	chr5:36827236-36830820	leanveh	dbLSDi	OK	8.81028	2.02741	-2.11955	0.0073
Chrna2	chr14:66759796-66771785	leanveh	dbLSDi	OK	13.5834	2.36503	-2.52191	0.0073
Adcy5	chr16:35155721-35304635	leanveh	dbLSDi	OK	30.0687	59.441	0.983195	0.0073
Khk	chr5:31224267-31233619	leanveh	dbLSDi	OK	37.9994	12.5069	-1.60325	0.0074
Tdrd6	chr17:43752283-43767248	leanveh	dbLSDi	OK	11.6155	2.69743	-2.1064	0.0074
Acsm3	chr7:126904436-126937572	leanveh	dbLSDi	OK	9.52009	0.881483	-3.43297	0.00745
Gadd45b	chr10:80392835-80394949	leanveh	dbLSDi	OK	11.1467	33.8368	1.60197	0.0075
Pygl	chr12:71291801-71328670	leanveh	dbLSDi	OK	56.0769	118.474	1.07909	0.0075
Krt79	chr15:101759762-101770755	leanveh	dbLSDi	OK	3.39493	15.9916	2.23586	0.0075
Clec4a2	chr6:123072707-123094017	leanveh	dbLSDi	OK	3.64448	13.5475	1.89424	0.00755
Prkce	chr17:86567124-87057259	leanveh	dbLSDi	OK	10.5136	20.2339	0.944518	0.00755
Atf3	chr1:192994175-193007212	leanveh	dbLSDi	OK	4.57186	24.8308	2.44128	0.00755
Bcam	chr7:20341486-20355881	leanveh	dbLSDi	OK	47.8432	24.5611	-0.961938	0.00755
Cds2	chr2:132088992-132137777	leanveh	dbLSDi	OK	23.3996	43.7822	0.90386	0.00755
Cilp	chr9:65112986-65128412	leanveh	dbLSDi	OK	5.44213	14.1142	1.37491	0.0076
Krt5	chr15:101537500-101543322	leanveh	dbLSDi	OK	5.31396	0.10637	-5.64262	0.0076
Ubxn2b	chr4:6118251-6146935	leanveh	dbLSDi	OK	6.07728	2.20076	-1.46542	0.0076
Sycp2	chr2:178080000-178142363	leanveh	dbLSDi	OK	4.91588	1.19042	-2.04598	0.00765
Klb	chr5:65739649-65775242	leanveh	dbLSDi	OK	6.45641	17.1317	1.40786	0.00765
Plekha5	chr6:140372619-140543427	leanveh	dbLSDi	OK	9.79904	3.83587	-1.35309	0.0077
Rtn2	chr7:19868015-19881509	leanveh	dbLSDi	OK	27.7297	71.4319	1.36514	0.0077
Gstm2	chr3:107784619-107789354	leanveh	dbLSDi	OK	270.698	126.2	-1.10097	0.00775
Tusc5	chr11:76493374-76512166	leanveh	dbLSDi	OK	121.899	263.648	1.11293	0.00775
Sgpl1	chr10:60561389-60610413	leanveh	dbLSDi	OK	40.246	74.6549	0.891392	0.0078
Map3k6	chr4:132796732-132808843	leanveh	dbLSDi	OK	22.3586	41.1815	0.881166	0.0078
Csf3r	chr4:125701902-125721684	leanveh	dbLSDi	OK	1.08753	4.40139	2.01691	0.00785
Eps8l2	chr7:148524900-148551009	leanveh	dbLSDi	OK	20.5017	3.22736	-2.66731	0.0079
Ndrg2	chr14:52524945-52533163	leanveh	dbLSDi	OK	88.2002	173.686	0.977624	0.0079
Heg1	chr16:33684551-33768281	leanveh	dbLSDi	OK	23.3071	44.4841	0.932519	0.0079
Aldh3b1	chr19:3913490-3929716	leanveh	dbLSDi	OK	8.60321	27.655	1.68459	0.00795
Itpripl2	chr7:125628625-125635489	leanveh	dbLSDi	OK	9.65375	18.2682	0.920175	0.008
Rtn4	chr11:29592897-29926033	leanveh	dbLSDi	OK	72.2842	161.974	1.16401	0.008
Cdkn1c	chr7:150644243-150646955	leanveh	dbLSDi	OK	17.9611	40.3433	1.16746	0.008
Prrx1	chr1:165175249-165243781	leanveh	dbLSDi	OK	6.78332	17.2623	1.34756	0.00805
Mmp14	chr14:55050440-55060095	leanveh	dbLSDi	OK	31.2482	59.2998	0.924255	0.00805
Mmgt1	chrX:53838688-53851096	leanveh	dbLSDi	OK	16.0838	31.2305	0.957346	0.00805
Isg20	chr7:86058650-86065282	leanveh	dbLSDi	OK	136.699	46.796	-1.54655	0.0081
Hipk2	chr6:38647838-38826189	leanveh	dbLSDi	OK	13.1938	27.6645	1.06818	0.0081
Piwil2	chr14:70772286-70828901	leanveh	dbLSDi	OK	7.37849	1.57853	-2.22474	0.00815
Sytl4	chrX:130470923-130516322	leanveh	dbLSDi	OK	6.23141	1.42633	-2.12725	0.00815
Rac2	chr15:78389598-78403213	leanveh	dbLSDi	OK	4.72257	14.9508	1.66258	0.0082
1110059M19Rik	chrX:42444080-42445967	leanveh	dbLSDi	OK	9.47229	51.6211	2.44618	0.0082
Rnf144b	chr13:47218088-47343360	leanveh	dbLSDi	OK	30.4691	15.8606	-0.941901	0.0082
C1qtnf4	chr2:90725942-90730683	leanveh	dbLSDi	OK	17.5571	4.35563	-2.0111	0.0082
Ttc9	chr12:82732355-82765928	leanveh	dbLSDi	OK	7.00506	1.78829	-1.96982	0.00825
Rab3ip	chr10:116342839-116387436	leanveh	dbLSDi	OK	16.0775	6.71965	-1.25859	0.00825
Zfp423	chr8:90185708-90483494	leanveh	dbLSDi	OK	8.4913	18.0766	1.09007	0.00825
Tmem65	chr15:58613823-58654982	leanveh	dbLSDi	OK	23.3081	43.2163	0.890747	0.0083
Lpgat1	chr1:193541902-193608134	leanveh	dbLSDi	OK	83.6083	248.465	1.57133	0.0083
Atp11a	chr8:12757015-12868728	leanveh	dbLSDi	OK	39.6176	19.011	-1.05931	0.0083
Nap1l1	chr10:110910247-110935206	leanveh	dbLSDi	OK	122.199	269.899	1.14319	0.0083
Cd300ld	chr11:114843760-114851200	leanveh	dbLSDi	OK	4.88153	14.024	1.52249	0.00835
Plaur	chr7:25247518-25260892	leanveh	dbLSDi	OK	7.1456	40.3272	2.49662	0.00835
Gatm	chr2:122420208-122437013	leanveh	dbLSDi	OK	24.1029	9.36957	-1.36315	0.00835
Fam38a	chr8:125000042-125075229	leanveh	dbLSDi	OK	11.2792	22.9807	1.02676	0.0084
Anxa6	chr11:54792463-54846973	leanveh	dbLSDi	OK	76.0605	147.506	0.955555	0.0084
Ece1	chr4:137418151-137521144	leanveh	dbLSDi	OK	44.9099	86.8382	0.951296	0.0084
Ubtd2	chr11:32355371-32418709	leanveh	dbLSDi	OK	8.51587	18.8291	1.14474	0.0084
Postn	chr3:54165028-54194963	leanveh	dbLSDi	OK	59.4814	113.853	0.936667	0.00845
Tgfb1	chr7:26472020-26490015	leanveh	dbLSDi	OK	32.3706	63.4528	0.971	0.00845
Capza2	chr6:17587097-17616536	leanveh	dbLSDi	OK	80.6921	149.303	0.887748	0.00845
Marveld3	chr8:112471808-112486105	leanveh	dbLSDi	OK	6.97613	0.0576927	-6.91789	0.00845
Rassf10	chr7:120097475-120100972	leanveh	dbLSDi	OK	3.68175	0.919352	-2.0017	0.00855
Ppfibp1	chr6:146837015-146980545	leanveh	dbLSDi	OK	27.8312	58.5626	1.07328	0.00855
Bpgm	chr6:34426355-34455610	leanveh	dbLSDi	OK	31.2121	62.3708	0.998765	0.0086
Dync2h1	chr9:6928502-7177046	leanveh	dbLSDi	OK	2.01775	0.732511	-1.46182	0.0086
Gm1564	chr11:102526901-102543551	leanveh	dbLSDi	OK	4.67057	1.27538	-1.87267	0.0086
Lrig1	chr6:94450307-94650139	leanveh	dbLSDi	OK	15.8788	6.73491	-1.23737	0.00865
P2ry6	chr7:108086147-108112880	leanveh	dbLSDi	OK	6.88465	20.6875	1.5873	0.0087
Crabp1	chr9:54612614-54620916	leanveh	dbLSDi	OK	21.1113	0.482462	-5.45145	0.0087
Sox12	chr2:152219347-152223782	leanveh	dbLSDi	OK	6.9407	2.42284	-1.51838	0.00875
Hmga1	chr17:27693518-27700617	leanveh	dbLSDi	OK	5.35412	17.819	1.73469	0.0088
Samd5	chr10:9347056-9395006	leanveh	dbLSDi	OK	3.73464	0.70151	-2.41243	0.0088
Egf	chr3:129380492-129466800	leanveh	dbLSDi	OK	7.45319	0.543476	-3.77757	0.00885
Lrrc25	chr8:73140742-73144749	leanveh	dbLSDi	OK	4.09692	15.9848	1.96409	0.00885
Wipf3	chr6:54402876-54453762	leanveh	dbLSDi	OK	9.69686	3.35944	-1.52929	0.00885
Plekhb1	chr7:107792409-107810908	leanveh	dbLSDi	OK	11.2837	1.27512	-3.14553	0.0089
Ubxn10	chr4:138274440-138281166	leanveh	dbLSDi	OK	13.9317	4.64523	-1.58455	0.00895
Samd10	chr2:181329923-181333852	leanveh	dbLSDi	OK	12.4863	2.82086	-2.14613	0.00895
Phospho1	chr11:95685813-95707045	leanveh	dbLSDi	OK	14.7639	42.4253	1.52286	0.00895
Sh3kbp1	chrX:156065339-156413849	leanveh	dbLSDi	OK	9.44984	19.7767	1.06544	0.009
Exoc6	chr19:37624907-37757739	leanveh	dbLSDi	OK	14.9345	31.7063	1.08612	0.009
Mboat2	chr12:25516463-25645164	leanveh	dbLSDi	OK	20.1947	0.892759	-4.49956	0.009
Pcyt1a	chr16:32431006-32475151	leanveh	dbLSDi	OK	20.9403	39.4736	0.914606	0.00905
Fam178a	chr19:45005608-45059040	leanveh	dbLSDi	OK	16.4924	7.95543	-1.05179	0.0091
Rasa3	chr8:13567217-13677587	leanveh	dbLSDi	OK	25.8834	46.994	0.86045	0.0091
Prdx6	chr1:163170242-163181297	leanveh	dbLSDi	OK	173.864	358.111	1.04245	0.0091
Lamc2	chr1:154969885-155033577	leanveh	dbLSDi	OK	5.93749	1.23998	-2.25954	0.00915
Snx7	chr3:117484414-117571854	leanveh	dbLSDi	OK	10.0525	24.345	1.27607	0.00915
Riok3	chr18:12287358-12315876	leanveh	dbLSDi	OK	39.6625	73.7167	0.894216	0.0092
Ankrd44	chr1:54702183-54983231	leanveh	dbLSDi	OK	5.91929	12.1954	1.04284	0.00925
Adam11	chr11:102622752-102641576	leanveh	dbLSDi	OK	6.23165	1.31668	-2.24271	0.00935
Lama3	chr18:12492532-12741521	leanveh	dbLSDi	OK	1.50965	0.365426	-2.04656	0.00935
Xylb	chr9:119266498-119302915	leanveh	dbLSDi	OK	7.58154	1.678	-2.17575	0.0094
Ocrl	chrX:45265632-45319043	leanveh	dbLSDi	OK	22.6401	10.5178	-1.10604	0.00945
Zcchc16	chrX:141123449-141556953	leanveh	dbLSDi	OK	1.4638	0.0447933	-5.03029	0.00945
Papss1	chr3:131227731-131306635	leanveh	dbLSDi	OK	41.8375	21.049	-0.991047	0.0095
Lpxn	chr19:12873098-12908298	leanveh	dbLSDi	OK	5.68218	30.8414	2.44035	0.00955
Stk24	chr14:121685562-121778452	leanveh	dbLSDi	OK	20.8361	39.9056	0.937504	0.00955
Cd37	chr7:52489001-52494209	leanveh	dbLSDi	OK	5.43276	22.7843	2.06828	0.00955
Cyp2j13	chr4:95709350-95744231	leanveh	dbLSDi	OK	5.07669	0.0188309	-8.07464	0.00955
Gna12	chr5:141235897-141306385	leanveh	dbLSDi	OK	25.6453	50.7054	0.983442	0.0096
Mef2d	chr3:87946316-87973089	leanveh	dbLSDi	OK	20.1989	40.5318	1.00478	0.0097
Mrap	chr16:90738568-90750021	leanveh	dbLSDi	OK	162.263	308.831	0.92848	0.0097
Osbpl7	chr11:96912133-96930218	leanveh	dbLSDi	OK	12.0565	4.97183	-1.27796	0.00975
Pex6	chr17:46848411-46862490	leanveh	dbLSDi	OK	29.9344	15.228	-0.975083	0.00975
Gm8439	chr4:120261349-120282277	leanveh	dbLSDi	OK	4.06378	0	#NAME?	0.00975
Ift122	chr6:115803545-115876717	leanveh	dbLSDi	OK	13.4805	4.46722	-1.59342	0.0098
Mal	chr2:127458961-127482431	leanveh	dbLSDi	OK	12.7323	0.926457	-3.78062	0.0098
H2-Ab1	chr17:34400171-34406363	leanveh	dbLSDi	OK	292.725	145.606	-1.00748	0.0098
Fitm2	chr2:163294438-163298739	leanveh	dbLSDi	OK	58.851	111.735	0.924941	0.0098
Galntl4	chr7:118615174-118923491	leanveh	dbLSDi	OK	19.2945	7.429	-1.37695	0.00985
Myh10	chr11:68505416-68630126	leanveh	dbLSDi	OK	9.4754	4.54863	-1.05876	0.00985
Tuba3a	chr6:125228291-125236060	leanveh	dbLSDi	OK	58.8989	18.1702	-1.69666	0.00985
Large	chr8:75338497-75876455	leanveh	dbLSDi	OK	6.13146	16.1772	1.39966	0.0099
Mtmr6	chr14:60884064-60921207	leanveh	dbLSDi	OK	32.2201	58.6814	0.864942	0.0099
Gapdh	chr6:125111869-125115601	leanveh	dbLSDi	OK	80.1986	148.447	0.888303	0.0099
Cbr2	chr11:120590798-120593335	leanveh	dbLSDi	OK	25.4935	65.6934	1.36562	0.0099

## Sheet: D - LSD1i-Upregulated GO terms
GroupID	Category	Term	Description	LogP	Log(q-value)	InTerm_InList	Genes	Symbols
1_Summary	GO Biological Processes	GO:0048232	male gamete generation	-24.2777	-20.0159	58/486	480,676,1636,2591,3306,3985,4957,5010,5224,6676,9389,10388,10732,11063,23762,25981,26038,26256,51087,51361,51686,53340,55124,55231,55779,55811,56155,56163,64753,79846,81626,81833,83449,83853,83890,83942,84073,84519,89765,124626,135138,143471,146849,148327,199223,199720,201164,202051,219793,257062,283629,285588,317719,346653,347732,375341,388799,646480,4846,54586	ATP1A4,BRDT,ACE,GALNT3,HSPA2,LIMK2,ODF2,CLDN11,PGAM2,SPAG4,SLC22A14,SYCP2,TCFL5,SOX30,OSBP2,DNAH1,CHD5,CABYR,YBX2,HOOK1,OAZ3,SPA17,PIWIL2,CCDC87,CFAP44,ADCY10,TEX14,RNF17,CCDC136,CFAP69,SHCBP1L,SPACA1,PMFBP1,ROPN1L,SPATA9,TSSK1B,MYCBPAP,ACRBP,RSPH1,ZPBP2,PACRG,PSMA8,CCDC42,CREB3L4,TTC21A,GGN,PLD6,SPATA24,TBATA,CATSPERD,TSSK4,EFCAB9,KLHL10,GARIN1A,CATSPER3,C3orf62,FAM209B,FABP9,NOS3,EQTN
1_Member	GO Biological Processes	GO:0048232	male gamete generation	-24.2777	-20.0159	58/486	480,676,1636,2591,3306,3985,4957,5010,5224,6676,9389,10388,10732,11063,23762,25981,26038,26256,51087,51361,51686,53340,55124,55231,55779,55811,56155,56163,64753,79846,81626,81833,83449,83853,83890,83942,84073,84519,89765,124626,135138,143471,146849,148327,199223,199720,201164,202051,219793,257062,283629,285588,317719,346653,347732,375341,388799,646480	ATP1A4,BRDT,ACE,GALNT3,HSPA2,LIMK2,ODF2,CLDN11,PGAM2,SPAG4,SLC22A14,SYCP2,TCFL5,SOX30,OSBP2,DNAH1,CHD5,CABYR,YBX2,HOOK1,OAZ3,SPA17,PIWIL2,CCDC87,CFAP44,ADCY10,TEX14,RNF17,CCDC136,CFAP69,SHCBP1L,SPACA1,PMFBP1,ROPN1L,SPATA9,TSSK1B,MYCBPAP,ACRBP,RSPH1,ZPBP2,PACRG,PSMA8,CCDC42,CREB3L4,TTC21A,GGN,PLD6,SPATA24,TBATA,CATSPERD,TSSK4,EFCAB9,KLHL10,GARIN1A,CATSPER3,C3orf62,FAM209B,FABP9
1_Member	GO Biological Processes	GO:0007283	spermatogenesis	-23.3345	-19.3737	56/471	480,676,1636,2591,3306,3985,4957,5010,5224,6676,9389,10732,11063,23762,25981,26038,26256,51087,51361,51686,53340,55124,55231,55779,55811,56163,64753,79846,81626,81833,83449,83853,83890,83942,84073,84519,89765,124626,135138,143471,146849,148327,199223,199720,201164,202051,219793,257062,283629,285588,317719,346653,347732,375341,388799,646480	ATP1A4,BRDT,ACE,GALNT3,HSPA2,LIMK2,ODF2,CLDN11,PGAM2,SPAG4,SLC22A14,TCFL5,SOX30,OSBP2,DNAH1,CHD5,CABYR,YBX2,HOOK1,OAZ3,SPA17,PIWIL2,CCDC87,CFAP44,ADCY10,RNF17,CCDC136,CFAP69,SHCBP1L,SPACA1,PMFBP1,ROPN1L,SPATA9,TSSK1B,MYCBPAP,ACRBP,RSPH1,ZPBP2,PACRG,PSMA8,CCDC42,CREB3L4,TTC21A,GGN,PLD6,SPATA24,TBATA,CATSPERD,TSSK4,EFCAB9,KLHL10,GARIN1A,CATSPER3,C3orf62,FAM209B,FABP9
1_Member	GO Biological Processes	GO:0007276	gamete generation	-20.6748	-16.8901	59/592	480,676,1636,2591,3306,3985,4846,4957,5010,5224,6676,9389,10388,10732,11063,23762,25981,26038,26256,51087,51361,51686,53340,55124,55231,55779,55811,56155,56163,64753,79846,81626,81833,83449,83853,83890,83942,84073,84519,89765,124626,135138,143471,146849,148327,199223,199720,201164,202051,219793,257062,283629,285588,317719,346653,347732,375341,388799,646480	ATP1A4,BRDT,ACE,GALNT3,HSPA2,LIMK2,NOS3,ODF2,CLDN11,PGAM2,SPAG4,SLC22A14,SYCP2,TCFL5,SOX30,OSBP2,DNAH1,CHD5,CABYR,YBX2,HOOK1,OAZ3,SPA17,PIWIL2,CCDC87,CFAP44,ADCY10,TEX14,RNF17,CCDC136,CFAP69,SHCBP1L,SPACA1,PMFBP1,ROPN1L,SPATA9,TSSK1B,MYCBPAP,ACRBP,RSPH1,ZPBP2,PACRG,PSMA8,CCDC42,CREB3L4,TTC21A,GGN,PLD6,SPATA24,TBATA,CATSPERD,TSSK4,EFCAB9,KLHL10,GARIN1A,CATSPER3,C3orf62,FAM209B,FABP9
1_Member	GO Biological Processes	GO:0007286	spermatid development	-19.4592	-15.7994	31/156	676,3306,4957,9389,11063,23762,25981,26038,26256,51361,55779,56163,64753,79846,81833,83853,83942,84519,89765,124626,135138,146849,199223,201164,257062,283629,285588,317719,346653,347732,646480	BRDT,HSPA2,ODF2,SLC22A14,SOX30,OSBP2,DNAH1,CHD5,CABYR,HOOK1,CFAP44,RNF17,CCDC136,CFAP69,SPACA1,ROPN1L,TSSK1B,ACRBP,RSPH1,ZPBP2,PACRG,CCDC42,TTC21A,PLD6,CATSPERD,TSSK4,EFCAB9,KLHL10,GARIN1A,CATSPER3,FABP9
1_Member	GO Biological Processes	GO:0048515	spermatid differentiation	-19.0342	-15.4713	31/161	676,3306,4957,9389,11063,23762,25981,26038,26256,51361,55779,56163,64753,79846,81833,83853,83942,84519,89765,124626,135138,146849,199223,201164,257062,283629,285588,317719,346653,347732,646480	BRDT,HSPA2,ODF2,SLC22A14,SOX30,OSBP2,DNAH1,CHD5,CABYR,HOOK1,CFAP44,RNF17,CCDC136,CFAP69,SPACA1,ROPN1L,TSSK1B,ACRBP,RSPH1,ZPBP2,PACRG,CCDC42,TTC21A,PLD6,CATSPERD,TSSK4,EFCAB9,KLHL10,GARIN1A,CATSPER3,FABP9
1_Member	GO Biological Processes	GO:0007281	germ cell development	-15.5105	-12.0268	33/242	676,3306,4957,9389,11063,23762,25981,26038,26256,51087,51361,55124,55779,56163,64753,79846,81833,83853,83942,84519,89765,124626,135138,146849,199223,201164,257062,283629,285588,317719,346653,347732,646480	BRDT,HSPA2,ODF2,SLC22A14,SOX30,OSBP2,DNAH1,CHD5,CABYR,YBX2,HOOK1,PIWIL2,CFAP44,RNF17,CCDC136,CFAP69,SPACA1,ROPN1L,TSSK1B,ACRBP,RSPH1,ZPBP2,PACRG,CCDC42,TTC21A,PLD6,CATSPERD,TSSK4,EFCAB9,KLHL10,GARIN1A,CATSPER3,FABP9
1_Member	GO Biological Processes	GO:0022412	cellular process involved in reproduction in multicellular organism	-14.462	-11.0452	37/332	676,3306,4957,9389,10388,11063,23762,25981,26038,26256,51087,51361,54586,55124,55779,56155,56163,64753,79846,81626,81833,83853,83942,84519,89765,124626,135138,146849,199223,201164,257062,283629,285588,317719,346653,347732,646480	BRDT,HSPA2,ODF2,SLC22A14,SYCP2,SOX30,OSBP2,DNAH1,CHD5,CABYR,YBX2,HOOK1,EQTN,PIWIL2,CFAP44,TEX14,RNF17,CCDC136,CFAP69,SHCBP1L,SPACA1,ROPN1L,TSSK1B,ACRBP,RSPH1,ZPBP2,PACRG,CCDC42,TTC21A,PLD6,CATSPERD,TSSK4,EFCAB9,KLHL10,GARIN1A,CATSPER3,FABP9
2_Summary	GO Biological Processes	GO:0001539	cilium or flagellum-dependent cell motility	-12.5575	-9.24985	21/115	480,1769,9389,25790,25981,27285,55036,55779,79846,80258,83853,85478,92749,114327,199223,219670,257062,283629,285588,347732,387712,26256,53340,55582,55811,83538,150082,7422,201164	ATP1A4,DNAH8,SLC22A14,CFAP45,DNAH1,TEKT2,CCDC40,CFAP44,CFAP69,EFHC2,ROPN1L,CCDC65,DRC1,EFHC1,TTC21A,ENKUR,CATSPERD,TSSK4,EFCAB9,CATSPER3,ENO4,CABYR,SPA17,KIF27,ADCY10,ODAD4,LCA5L,VEGFA,PLD6
2_Member	GO Biological Processes	GO:0001539	cilium or flagellum-dependent cell motility	-12.5575	-9.24985	21/115	480,1769,9389,25790,25981,27285,55036,55779,79846,80258,83853,85478,92749,114327,199223,219670,257062,283629,285588,347732,387712	ATP1A4,DNAH8,SLC22A14,CFAP45,DNAH1,TEKT2,CCDC40,CFAP44,CFAP69,EFHC2,ROPN1L,CCDC65,DRC1,EFHC1,TTC21A,ENKUR,CATSPERD,TSSK4,EFCAB9,CATSPER3,ENO4
2_Member	GO Biological Processes	GO:0060285	cilium-dependent cell motility	-12.5575	-9.24985	21/115	480,1769,9389,25790,25981,27285,55036,55779,79846,80258,83853,85478,92749,114327,199223,219670,257062,283629,285588,347732,387712	ATP1A4,DNAH8,SLC22A14,CFAP45,DNAH1,TEKT2,CCDC40,CFAP44,CFAP69,EFHC2,ROPN1L,CCDC65,DRC1,EFHC1,TTC21A,ENKUR,CATSPERD,TSSK4,EFCAB9,CATSPER3,ENO4
2_Member	GO Biological Processes	GO:0003341	cilium movement	-10.5395	-7.2776	21/145	480,9389,25790,25981,26256,27285,53340,55036,55582,55779,55811,79846,83538,83853,199223,219670,257062,283629,285588,347732,387712	ATP1A4,SLC22A14,CFAP45,DNAH1,CABYR,TEKT2,SPA17,CCDC40,KIF27,CFAP44,ADCY10,CFAP69,ODAD4,ROPN1L,TTC21A,ENKUR,CATSPERD,TSSK4,EFCAB9,CATSPER3,ENO4
2_Member	GO Biological Processes	GO:0030317	flagellated sperm motility	-9.0139	-5.83123	16/97	480,9389,25790,25981,27285,55036,55779,79846,83853,199223,219670,257062,283629,285588,347732,387712	ATP1A4,SLC22A14,CFAP45,DNAH1,TEKT2,CCDC40,CFAP44,CFAP69,ROPN1L,TTC21A,ENKUR,CATSPERD,TSSK4,EFCAB9,CATSPER3,ENO4
2_Member	GO Biological Processes	GO:0097722	sperm motility	-9.0139	-5.83123	16/97	480,9389,25790,25981,27285,55036,55779,79846,83853,199223,219670,257062,283629,285588,347732,387712	ATP1A4,SLC22A14,CFAP45,DNAH1,TEKT2,CCDC40,CFAP44,CFAP69,ROPN1L,TTC21A,ENKUR,CATSPERD,TSSK4,EFCAB9,CATSPER3,ENO4
2_Member	GO Biological Processes	GO:0060294	cilium movement involved in cell motility	-8.49209	-5.34418	16/105	480,9389,25790,25981,27285,55036,55779,79846,83853,199223,219670,257062,283629,285588,347732,387712	ATP1A4,SLC22A14,CFAP45,DNAH1,TEKT2,CCDC40,CFAP44,CFAP69,ROPN1L,TTC21A,ENKUR,CATSPERD,TSSK4,EFCAB9,CATSPER3,ENO4
2_Member	GO Biological Processes	GO:0048240	sperm capacitation	-5.30359	-2.36395	6/20	9389,26256,83853,257062,285588,347732	SLC22A14,CABYR,ROPN1L,CATSPERD,EFCAB9,CATSPER3
2_Member	GO Biological Processes	GO:0007018	microtubule-based movement	-5.22766	-2.30823	23/338	480,1769,9389,25790,25981,26256,27285,53340,55036,55582,55779,55811,79846,83538,83853,150082,199223,219670,257062,283629,285588,347732,387712	ATP1A4,DNAH8,SLC22A14,CFAP45,DNAH1,CABYR,TEKT2,SPA17,CCDC40,KIF27,CFAP44,ADCY10,CFAP69,ODAD4,ROPN1L,LCA5L,TTC21A,ENKUR,CATSPERD,TSSK4,EFCAB9,CATSPER3,ENO4
2_Member	GO Biological Processes	GO:0048469	cell maturation	-2.08916	0	8/121	7422,9389,26256,83853,201164,257062,285588,347732	VEGFA,SLC22A14,CABYR,ROPN1L,PLD6,CATSPERD,EFCAB9,CATSPER3
3_Summary	GO Biological Processes	GO:0003351	epithelial cilium movement involved in extracellular fluid movement	-7.17984	-4.06412	9/34	25790,25981,26256,53340,55036,55582,55811,83538,83853,150082,199223	CFAP45,DNAH1,CABYR,SPA17,CCDC40,KIF27,ADCY10,ODAD4,ROPN1L,LCA5L,TTC21A
3_Member	GO Biological Processes	GO:0003351	epithelial cilium movement involved in extracellular fluid movement	-7.17984	-4.06412	9/34	25790,25981,26256,53340,55036,55582,55811,83538,83853	CFAP45,DNAH1,CABYR,SPA17,CCDC40,KIF27,ADCY10,ODAD4,ROPN1L
3_Member	GO Biological Processes	GO:0006858	extracellular transport	-6.832	-3.74925	9/37	25790,25981,26256,53340,55036,55582,55811,83538,83853	CFAP45,DNAH1,CABYR,SPA17,CCDC40,KIF27,ADCY10,ODAD4,ROPN1L
3_Member	GO Biological Processes	GO:0099111	microtubule-based transport	-2.33058	0	11/185	25790,25981,26256,53340,55036,55582,55811,83538,83853,150082,199223	CFAP45,DNAH1,CABYR,SPA17,CCDC40,KIF27,ADCY10,ODAD4,ROPN1L,LCA5L,TTC21A
4_Summary	GO Biological Processes	GO:0001675	acrosome assembly	-6.80699	-3.74925	7/19	11063,64753,81833,84519,124626,346653,646480,2817,11076	SOX30,CCDC136,SPACA1,ACRBP,ZPBP2,GARIN1A,FABP9,GPC1,TPPP
4_Member	GO Biological Processes	GO:0001675	acrosome assembly	-6.80699	-3.74925	7/19	11063,64753,81833,84519,124626,346653,646480	SOX30,CCDC136,SPACA1,ACRBP,ZPBP2,GARIN1A,FABP9
4_Member	GO Biological Processes	GO:0010927	cellular component assembly involved in morphogenesis	-4.12578	-1.2789	9/76	2817,11063,11076,64753,81833,84519,124626,346653,646480	GPC1,SOX30,TPPP,CCDC136,SPACA1,ACRBP,ZPBP2,GARIN1A,FABP9
4_Member	GO Biological Processes	GO:0033363	secretory granule organization	-3.7287	-0.898207	7/51	11063,64753,81833,84519,124626,346653,646480	SOX30,CCDC136,SPACA1,ACRBP,ZPBP2,GARIN1A,FABP9
5_Summary	GO Biological Processes	GO:0001578	microtubule bundle formation	-6.59781	-3.56641	14/108	1769,4133,11076,25981,27285,55036,55779,79846,83538,85478,89765,92749,284076,352909,480,3985,4957,9053,9389,25790,26256,51361,53340,54986,55521,55582,55811,79745,80258,83853,114327,150082,199223,219670,257062,283629,285588,347732,387712,127733,257236	DNAH8,MAP2,TPPP,DNAH1,TEKT2,CCDC40,CFAP44,CFAP69,ODAD4,CCDC65,RSPH1,DRC1,TTLL6,DNAAF3,ATP1A4,LIMK2,ODF2,MAP7,SLC22A14,CFAP45,CABYR,HOOK1,SPA17,ULK4,TRIM36,KIF27,ADCY10,CLIP4,EFHC2,ROPN1L,EFHC1,LCA5L,TTC21A,ENKUR,CATSPERD,TSSK4,EFCAB9,CATSPER3,ENO4,UBXN10,CCDC96
5_Member	GO Biological Processes	GO:0001578	microtubule bundle formation	-6.59781	-3.56641	14/108	1769,4133,11076,25981,27285,55036,55779,79846,83538,85478,89765,92749,284076,352909	DNAH8,MAP2,TPPP,DNAH1,TEKT2,CCDC40,CFAP44,CFAP69,ODAD4,CCDC65,RSPH1,DRC1,TTLL6,DNAAF3
5_Member	GO Biological Processes	GO:0007017	microtubule-based process	-6.14804	-3.14145	39/705	480,1769,3985,4133,4957,9053,9389,11076,25790,25981,26256,27285,51361,53340,54986,55036,55521,55582,55779,55811,79745,79846,80258,83538,83853,85478,89765,92749,114327,150082,199223,219670,257062,283629,284076,285588,347732,352909,387712	ATP1A4,DNAH8,LIMK2,MAP2,ODF2,MAP7,SLC22A14,TPPP,CFAP45,DNAH1,CABYR,TEKT2,HOOK1,SPA17,ULK4,CCDC40,TRIM36,KIF27,CFAP44,ADCY10,CLIP4,CFAP69,EFHC2,ODAD4,ROPN1L,CCDC65,RSPH1,DRC1,EFHC1,LCA5L,TTC21A,ENKUR,CATSPERD,TSSK4,TTLL6,EFCAB9,CATSPER3,DNAAF3,ENO4
5_Member	GO Biological Processes	GO:0070286	axonemal dynein complex assembly	-5.90807	-2.92497	8/35	1769,25981,27285,55036,83538,85478,92749,352909	DNAH8,DNAH1,TEKT2,CCDC40,ODAD4,CCDC65,DRC1,DNAAF3
5_Member	GO Biological Processes	GO:0035082	axoneme assembly	-5.67254	-2.71172	11/78	1769,25981,27285,55036,55779,79846,83538,85478,89765,92749,352909	DNAH8,DNAH1,TEKT2,CCDC40,CFAP44,CFAP69,ODAD4,CCDC65,RSPH1,DRC1,DNAAF3
5_Member	GO Biological Processes	GO:0044782	cilium organization	-3.32089	-0.521432	18/312	1769,4957,25981,27285,55036,55582,55779,79846,83538,85478,89765,92749,127733,150082,199223,257236,352909,387712	DNAH8,ODF2,DNAH1,TEKT2,CCDC40,KIF27,CFAP44,CFAP69,ODAD4,CCDC65,RSPH1,DRC1,UBXN10,LCA5L,TTC21A,CCDC96,DNAAF3,ENO4
5_Member	GO Biological Processes	GO:0000226	microtubule cytoskeleton organization	-3.04752	-0.290811	23/472	1769,3985,4133,4957,9053,11076,25981,27285,51361,54986,55036,55521,55779,79745,79846,80258,83538,85478,89765,92749,114327,284076,352909	DNAH8,LIMK2,MAP2,ODF2,MAP7,TPPP,DNAH1,TEKT2,HOOK1,ULK4,CCDC40,TRIM36,CFAP44,CLIP4,CFAP69,EFHC2,ODAD4,CCDC65,RSPH1,DRC1,EFHC1,TTLL6,DNAAF3
5_Member	GO Biological Processes	GO:0036159	inner dynein arm assembly	-2.31306	0	3/15	25981,27285,55036	DNAH1,TEKT2,CCDC40
5_Member	GO Biological Processes	GO:0060271	cilium assembly	-2.08597	0	14/285	1769,25981,27285,55036,55582,55779,79846,83538,85478,89765,92749,127733,257236,352909	DNAH8,DNAH1,TEKT2,CCDC40,KIF27,CFAP44,CFAP69,ODAD4,CCDC65,RSPH1,DRC1,UBXN10,CCDC96,DNAAF3
5_Member	GO Biological Processes	GO:0044458	motile cilium assembly	-2.08481	0	5/53	25981,55036,55779,79846,352909	DNAH1,CCDC40,CFAP44,CFAP69,DNAAF3
6_Summary	GO Biological Processes	GO:0060632	regulation of microtubule-based movement	-4.42482	-1.52469	7/40	4133,25790,55036,79846,85478,92749,284076,83538	MAP2,CFAP45,CCDC40,CFAP69,CCDC65,DRC1,TTLL6,ODAD4
6_Member	GO Biological Processes	GO:0060632	regulation of microtubule-based movement	-4.42482	-1.52469	7/40	4133,25790,55036,79846,85478,92749,284076	MAP2,CFAP45,CCDC40,CFAP69,CCDC65,DRC1,TTLL6
6_Member	GO Biological Processes	GO:0003352	regulation of cilium movement	-4.38552	-1.50387	6/28	25790,55036,79846,85478,92749,284076	CFAP45,CCDC40,CFAP69,CCDC65,DRC1,TTLL6
6_Member	GO Biological Processes	GO:0060287	epithelial cilium movement involved in determination of left/right asymmetry	-2.72304	-0.084428	3/11	25790,55036,83538	CFAP45,CCDC40,ODAD4
6_Member	GO Biological Processes	GO:0003356	regulation of cilium beat frequency	-2.31306	0	3/15	25790,55036,284076	CFAP45,CCDC40,TTLL6
6_Member	GO Biological Processes	GO:0060295	regulation of cilium movement involved in cell motility	-2.01514	0	3/19	25790,79846,284076	CFAP45,CFAP69,TTLL6
6_Member	GO Biological Processes	GO:1902019	regulation of cilium-dependent cell motility	-2.01514	0	3/19	25790,79846,284076	CFAP45,CFAP69,TTLL6
7_Summary	GO Biological Processes	GO:0009566	fertilization	-4.32391	-1.45999	13/147	49,480,3305,10388,53340,54586,55231,55521,64753,84519,124626,283629,317719	ACR,ATP1A4,HSPA1L,SYCP2,SPA17,EQTN,CCDC87,TRIM36,CCDC136,ACRBP,ZPBP2,TSSK4,KLHL10
7_Member	GO Biological Processes	GO:0009566	fertilization	-4.32391	-1.45999	13/147	49,480,3305,10388,53340,54586,55231,55521,64753,84519,124626,283629,317719	ACR,ATP1A4,HSPA1L,SYCP2,SPA17,EQTN,CCDC87,TRIM36,CCDC136,ACRBP,ZPBP2,TSSK4,KLHL10
7_Member	GO Biological Processes	GO:0007339	binding of sperm to zona pellucida	-2.22973	0	4/31	49,3305,53340,124626	ACR,HSPA1L,SPA17,ZPBP2
7_Member	GO Biological Processes	GO:0007338	single fertilization	-2.15275	0	8/118	49,3305,53340,54586,55231,55521,64753,124626	ACR,HSPA1L,SPA17,EQTN,CCDC87,TRIM36,CCDC136,ZPBP2
7_Member	GO Biological Processes	GO:0007340	acrosome reaction	-2.01514	0	3/19	49,54586,55521	ACR,EQTN,TRIM36
8_Summary	Reactome Gene Sets	R-HSA-1247673	Erythrocytes take up oxygen and release carbon dioxide	-3.6011	-0.7864	3/6	762,3043,6521,7439	CA4,HBB,SLC4A1,BEST1
8_Member	Reactome Gene Sets	R-HSA-1247673	Erythrocytes take up oxygen and release carbon dioxide	-3.6011	-0.7864	3/6	762,3043,6521	CA4,HBB,SLC4A1
8_Member	Reactome Gene Sets	R-HSA-1237044	Erythrocytes take up carbon dioxide and release oxygen	-3.00091	-0.283122	3/9	762,3043,6521	CA4,HBB,SLC4A1
8_Member	Reactome Gene Sets	R-HSA-1480926	O2/CO2 exchange in erythrocytes	-3.00091	-0.283122	3/9	762,3043,6521	CA4,HBB,SLC4A1
8_Member	GO Biological Processes	GO:0015701	bicarbonate transport	-2.08219	0	3/18	762,6521,7439	CA4,SLC4A1,BEST1
9_Summary	GO Biological Processes	GO:2000243	positive regulation of reproductive process	-3.28457	-0.499831	7/60	5021,7422,55124,55231,56729,79846,151056	OXTR,VEGFA,PIWIL2,CCDC87,RETN,CFAP69,PLB1
9_Member	GO Biological Processes	GO:2000243	positive regulation of reproductive process	-3.28457	-0.499831	7/60	5021,7422,55124,55231,56729,79846,151056	OXTR,VEGFA,PIWIL2,CCDC87,RETN,CFAP69,PLB1
10_Summary	GO Biological Processes	GO:0003018	vascular process in circulatory system	-3.1268	-0.356301	14/219	183,480,489,1311,1636,3764,4846,5021,6515,6540,7422,9194,11156,83483	AGT,ATP1A4,ATP2A3,COMP,ACE,KCNJ8,NOS3,OXTR,SLC2A3,SLC6A13,VEGFA,SLC16A7,PTP4A3,PLVAP
10_Member	GO Biological Processes	GO:0003018	vascular process in circulatory system	-3.1268	-0.356301	14/219	183,480,489,1311,1636,3764,4846,5021,6515,6540,7422,9194,11156,83483	AGT,ATP1A4,ATP2A3,COMP,ACE,KCNJ8,NOS3,OXTR,SLC2A3,SLC6A13,VEGFA,SLC16A7,PTP4A3,PLVAP
11_Summary	Reactome Gene Sets	R-HSA-1300642	Sperm Motility And Taxes	-3.00091	-0.283122	3/9	157855,257062,347732,49,3306,10388,10734	KCNU1,CATSPERD,CATSPER3,ACR,HSPA2,SYCP2,STAG3
11_Member	Reactome Gene Sets	R-HSA-1300642	Sperm Motility And Taxes	-3.00091	-0.283122	3/9	157855,257062,347732	KCNU1,CATSPERD,CATSPER3
11_Member	Reactome Gene Sets	R-HSA-1187000	Fertilization	-2.95335	-0.247795	4/20	49,157855,257062,347732	ACR,KCNU1,CATSPERD,CATSPER3
11_Member	Reactome Gene Sets	R-HSA-1474165	Reproduction	-2.06144	0	7/98	49,3306,10388,10734,157855,257062,347732	ACR,HSPA2,SYCP2,STAG3,KCNU1,CATSPERD,CATSPER3
12_Summary	GO Biological Processes	GO:0003044	regulation of systemic arterial blood pressure mediated by a chemical signal	-2.93943	-0.245774	5/34	183,1636,4846,5021,6518,51655,4739,9094,80725,18,91683	AGT,ACE,NOS3,OXTR,SLC2A5,RASD1,NEDD9,UNC119,SRCIN1,ABAT,SYT12
12_Member	GO Biological Processes	GO:0003044	regulation of systemic arterial blood pressure mediated by a chemical signal	-2.93943	-0.245774	5/34	183,1636,4846,5021,6518	AGT,ACE,NOS3,OXTR,SLC2A5
12_Member	GO Biological Processes	GO:0007263	nitric oxide mediated signal transduction	-2.60575	0	3/12	183,4846,51655	AGT,NOS3,RASD1
12_Member	GO Biological Processes	GO:0001990	regulation of systemic arterial blood pressure by hormone	-2.57707	0	4/25	183,1636,4846,5021	AGT,ACE,NOS3,OXTR
12_Member	GO Biological Processes	GO:0061098	positive regulation of protein tyrosine kinase activity	-2.38904	0	5/45	183,1636,4739,9094,80725	AGT,ACE,NEDD9,UNC119,SRCIN1
12_Member	GO Biological Processes	GO:0050433	regulation of catecholamine secretion	-2.33577	0	4/29	18,183,5021,91683	ABAT,AGT,OXTR,SYT12
12_Member	GO Biological Processes	GO:0050886	endocrine process	-2.04069	0	4/35	183,1636,4846,5021	AGT,ACE,NOS3,OXTR
13_Summary	GO Biological Processes	GO:0006165	nucleoside diphosphate phosphorylation	-2.81661	-0.134541	6/53	669,3098,5211,5224,158067,387712,79873,222,23225,283871,4846,5054,7422,7428	BPGM,HK1,PFKL,PGAM2,AK8,ENO4,NUDT18,ALDH3B2,NUP210,PGP,NOS3,SERPINE1,VEGFA,VHL
13_Member	GO Biological Processes	GO:0006165	nucleoside diphosphate phosphorylation	-2.81661	-0.134541	6/53	669,3098,5211,5224,158067,387712	BPGM,HK1,PFKL,PGAM2,AK8,ENO4
13_Member	GO Biological Processes	GO:0006096	glycolytic process	-2.76968	-0.109886	5/37	669,3098,5211,5224,387712	BPGM,HK1,PFKL,PGAM2,ENO4
13_Member	GO Biological Processes	GO:0006757	ATP generation from ADP	-2.76968	-0.109886	5/37	669,3098,5211,5224,387712	BPGM,HK1,PFKL,PGAM2,ENO4
13_Member	GO Biological Processes	GO:0046939	nucleotide phosphorylation	-2.73247	-0.084428	6/55	669,3098,5211,5224,158067,387712	BPGM,HK1,PFKL,PGAM2,AK8,ENO4
13_Member	GO Biological Processes	GO:0009135	purine nucleoside diphosphate metabolic process	-2.65211	-0.033702	6/57	669,3098,5211,5224,79873,387712	BPGM,HK1,PFKL,PGAM2,NUDT18,ENO4
13_Member	GO Biological Processes	GO:0009179	purine ribonucleoside diphosphate metabolic process	-2.65211	-0.033702	6/57	669,3098,5211,5224,79873,387712	BPGM,HK1,PFKL,PGAM2,NUDT18,ENO4
13_Member	KEGG Pathway	hsa00010	Glycolysis / Gluconeogenesis	-2.53806	0	6/60	222,669,3098,5211,5224,387712	ALDH3B2,BPGM,HK1,PFKL,PGAM2,ENO4
13_Member	GO Biological Processes	GO:0009132	nucleoside diphosphate metabolic process	-2.45407	0	7/83	669,3098,5211,5224,79873,158067,387712	BPGM,HK1,PFKL,PGAM2,NUDT18,AK8,ENO4
13_Member	GO Biological Processes	GO:0046031	ADP metabolic process	-2.38904	0	5/45	669,3098,5211,5224,387712	BPGM,HK1,PFKL,PGAM2,ENO4
13_Member	GO Biological Processes	GO:0009185	ribonucleoside diphosphate metabolic process	-2.29831	0	6/67	669,3098,5211,5224,79873,387712	BPGM,HK1,PFKL,PGAM2,NUDT18,ENO4
13_Member	Reactome Gene Sets	R-HSA-70171	Glycolysis	-2.23574	0	6/69	669,3098,5211,5224,23225,283871	BPGM,HK1,PFKL,PGAM2,NUP210,PGP
13_Member	KEGG Pathway	hsa04066	HIF-1 signaling pathway	-2.01536	0	7/100	3098,4846,5054,5211,7422,7428,387712	HK1,NOS3,SERPINE1,PFKL,VEGFA,VHL,ENO4
14_Summary	GO Biological Processes	GO:0007140	male meiotic nuclear division	-2.19162	0	5/50	676,3306,10388,56155,81626	BRDT,HSPA2,SYCP2,TEX14,SHCBP1L
14_Member	GO Biological Processes	GO:0007140	male meiotic nuclear division	-2.19162	0	5/50	676,3306,10388,56155,81626	BRDT,HSPA2,SYCP2,TEX14,SHCBP1L
15_Summary	GO Biological Processes	GO:0035640	exploration behavior	-2.15378	0	3/17	18,5581,10752	ABAT,PRKCE,CHL1
15_Member	GO Biological Processes	GO:0035640	exploration behavior	-2.15378	0	3/17	18,5581,10752	ABAT,PRKCE,CHL1
16_Summary	KEGG Pathway	hsa00591	Linoleic acid metabolism	-2.01514	0	3/19	1557,5322,151056	CYP2C19,PLA2G5,PLB1
16_Member	KEGG Pathway	hsa00591	Linoleic acid metabolism	-2.01514	0	3/19	1557,5322,151056	CYP2C19,PLA2G5,PLB1

## Sheet: E - LSD1i-Downregulated GO term
GroupID	Category	Term	Description	LogP	Log(q-value)	InTerm_InList	Genes	Symbols
1_Summary	Reactome Gene Sets	R-HSA-1474244	Extracellular matrix organization	-27.3433	-23.0815	47/240	2,101,633,1277,1278,1281,1289,1290,1293,1295,1306,1513,2192,2200,2243,2244,2266,2331,2335,3371,3681,3684,3685,3687,3689,3908,4017,4060,4239,4321,4323,5118,5340,5351,6382,6696,7276,7373,7448,8038,8076,8728,9672,11117,80781,164656,256076,538,1545,3936,4643,5345,10631,25903,60681,81792,822,2059,2318,3059,3855,3856,3925,4082,7018,9051,9938,11151,22974,283431,3783,64759,3083,5795,9935,135228,151516,445	A2M,ADAM8,BGN,COL1A1,COL1A2,COL3A1,COL5A1,COL5A2,COL6A3,COL8A1,COL15A1,CTSK,FBLN1,FBN1,FGA,FGB,FGG,FMOD,FN1,TNC,ITGAD,ITGAM,ITGAV,ITGAX,ITGB2,LAMA2,LOXL2,LUM,MFAP4,MMP12,MMP14,PCOLCE,PLG,PLOD1,SDC1,SPP1,TTR,COL14A1,VTN,ADAM12,MFAP5,ADAM19,SDC3,EMILIN1,COL18A1,TMPRSS6,COL6A5,ATP7A,CYP1B1,LCP1,MYO1E,SERPINF2,POSTN,OLFML2B,FKBP10,ADAMTS12,CAPG,EPS8,FLNC,HCLS1,KRT7,KRT8,STMN1,MARCKS,TF,PSTPIP1,ARHGAP…
1_Member	Reactome Gene Sets	R-HSA-1474244	Extracellular matrix organization	-27.3433	-23.0815	47/240	2,101,633,1277,1278,1281,1289,1290,1293,1295,1306,1513,2192,2200,2243,2244,2266,2331,2335,3371,3681,3684,3685,3687,3689,3908,4017,4060,4239,4321,4323,5118,5340,5351,6382,6696,7276,7373,7448,8038,8076,8728,9672,11117,80781,164656,256076	A2M,ADAM8,BGN,COL1A1,COL1A2,COL3A1,COL5A1,COL5A2,COL6A3,COL8A1,COL15A1,CTSK,FBLN1,FBN1,FGA,FGB,FGG,FMOD,FN1,TNC,ITGAD,ITGAM,ITGAV,ITGAX,ITGB2,LAMA2,LOXL2,LUM,MFAP4,MMP12,MMP14,PCOLCE,PLG,PLOD1,SDC1,SPP1,TTR,COL14A1,VTN,ADAM12,MFAP5,ADAM19,SDC3,EMILIN1,COL18A1,TMPRSS6,COL6A5
1_Member	Reactome Gene Sets	R-HSA-216083	Integrin cell surface interactions	-18.3597	-14.3989	23/74	1277,1278,1281,1289,1290,1293,1295,2200,2243,2244,2266,2335,3371,3681,3684,3685,3687,3689,4060,6696,7448,80781,256076	COL1A1,COL1A2,COL3A1,COL5A1,COL5A2,COL6A3,COL8A1,FBN1,FGA,FGB,FGG,FN1,TNC,ITGAD,ITGAM,ITGAV,ITGAX,ITGB2,LUM,SPP1,VTN,COL18A1,COL6A5
1_Member	GO Biological Processes	GO:0030198	extracellular matrix organization	-14.5681	-11.0249	31/208	101,538,1277,1278,1281,1289,1290,1295,1306,1513,1545,2192,2331,3936,4017,4060,4239,4321,4323,4643,5340,5345,7373,10631,11117,25903,60681,80781,81792,164656,256076	ADAM8,ATP7A,COL1A1,COL1A2,COL3A1,COL5A1,COL5A2,COL8A1,COL15A1,CTSK,CYP1B1,FBLN1,FMOD,LCP1,LOXL2,LUM,MFAP4,MMP12,MMP14,MYO1E,PLG,SERPINF2,COL14A1,POSTN,EMILIN1,OLFML2B,FKBP10,COL18A1,ADAMTS12,TMPRSS6,COL6A5
1_Member	GO Biological Processes	GO:0045229	external encapsulating structure organization	-14.5681	-11.0249	31/208	101,538,1277,1278,1281,1289,1290,1295,1306,1513,1545,2192,2331,3936,4017,4060,4239,4321,4323,4643,5340,5345,7373,10631,11117,25903,60681,80781,81792,164656,256076	ADAM8,ATP7A,COL1A1,COL1A2,COL3A1,COL5A1,COL5A2,COL8A1,COL15A1,CTSK,CYP1B1,FBLN1,FMOD,LCP1,LOXL2,LUM,MFAP4,MMP12,MMP14,MYO1E,PLG,SERPINF2,COL14A1,POSTN,EMILIN1,OLFML2B,FKBP10,COL18A1,ADAMTS12,TMPRSS6,COL6A5
1_Member	GO Biological Processes	GO:0043062	extracellular structure organization	-14.5086	-11.0249	31/209	101,538,1277,1278,1281,1289,1290,1295,1306,1513,1545,2192,2331,3936,4017,4060,4239,4321,4323,4643,5340,5345,7373,10631,11117,25903,60681,80781,81792,164656,256076	ADAM8,ATP7A,COL1A1,COL1A2,COL3A1,COL5A1,COL5A2,COL8A1,COL15A1,CTSK,CYP1B1,FBLN1,FMOD,LCP1,LOXL2,LUM,MFAP4,MMP12,MMP14,MYO1E,PLG,SERPINF2,COL14A1,POSTN,EMILIN1,OLFML2B,FKBP10,COL18A1,ADAMTS12,TMPRSS6,COL6A5
1_Member	Reactome Gene Sets	R-HSA-1474228	Degradation of the extracellular matrix	-12.8533	-9.59144	21/102	2,101,1277,1278,1281,1289,1290,1293,1295,1306,1513,2200,2335,4321,4323,5340,6696,7373,80781,164656,256076	A2M,ADAM8,COL1A1,COL1A2,COL3A1,COL5A1,COL5A2,COL6A3,COL8A1,COL15A1,CTSK,FBN1,FN1,MMP12,MMP14,PLG,SPP1,COL14A1,COL18A1,TMPRSS6,COL6A5
1_Member	Reactome Gene Sets	R-HSA-1442490	Collagen degradation	-11.7621	-8.57942	15/51	1277,1278,1281,1289,1290,1293,1295,1306,1513,4321,4323,7373,80781,164656,256076	COL1A1,COL1A2,COL3A1,COL5A1,COL5A2,COL6A3,COL8A1,COL15A1,CTSK,MMP12,MMP14,COL14A1,COL18A1,TMPRSS6,COL6A5
1_Member	Reactome Gene Sets	R-HSA-3000178	ECM proteoglycans	-11.6544	-8.50649	16/61	633,1277,1278,1281,1289,1290,1293,2331,2335,3371,3685,3687,3908,4060,7448,256076	BGN,COL1A1,COL1A2,COL3A1,COL5A1,COL5A2,COL6A3,FMOD,FN1,TNC,ITGAV,ITGAX,LAMA2,LUM,VTN,COL6A5
1_Member	Reactome Gene Sets	R-HSA-3000170	Syndecan interactions	-10.7615	-7.6458	11/26	1277,1278,1281,1289,1290,2335,3371,3685,6382,7448,9672	COL1A1,COL1A2,COL3A1,COL5A1,COL5A2,FN1,TNC,ITGAV,SDC1,VTN,SDC3
1_Member	GO Biological Processes	GO:0030199	collagen fibril organization	-10.6914	-7.60564	14/50	538,1277,1278,1281,1289,1290,1545,2331,4017,4060,5345,7373,60681,81792	ATP7A,COL1A1,COL1A2,COL3A1,COL5A1,COL5A2,CYP1B1,FMOD,LOXL2,LUM,SERPINF2,COL14A1,FKBP10,ADAMTS12
1_Member	Reactome Gene Sets	R-HSA-8948216	Collagen chain trimerization	-9.27417	-6.42728	11/34	1277,1278,1281,1289,1290,1293,1295,1306,7373,80781,256076	COL1A1,COL1A2,COL3A1,COL5A1,COL5A2,COL6A3,COL8A1,COL15A1,COL14A1,COL18A1,COL6A5
1_Member	Reactome Gene Sets	R-HSA-2022090	Assembly of collagen fibrils and other multimeric structures	-9.1782	-6.40771	13/53	1277,1278,1281,1289,1290,1293,1295,1306,4017,5118,7373,80781,256076	COL1A1,COL1A2,COL3A1,COL5A1,COL5A2,COL6A3,COL8A1,COL15A1,LOXL2,PCOLCE,COL14A1,COL18A1,COL6A5
1_Member	Reactome Gene Sets	R-HSA-1650814	Collagen biosynthesis and modifying enzymes	-9.06881	-6.3121	13/54	1277,1278,1281,1289,1290,1293,1295,1306,5118,5351,7373,80781,256076	COL1A1,COL1A2,COL3A1,COL5A1,COL5A2,COL6A3,COL8A1,COL15A1,PCOLCE,PLOD1,COL14A1,COL18A1,COL6A5
1_Member	Reactome Gene Sets	R-HSA-3000171	Non-integrin membrane-ECM interactions	-8.96191	-6.23154	13/55	1277,1278,1281,1289,1290,2335,3371,3685,3908,6382,7276,7448,9672	COL1A1,COL1A2,COL3A1,COL5A1,COL5A2,FN1,TNC,ITGAV,LAMA2,SDC1,TTR,VTN,SDC3
1_Member	Reactome Gene Sets	R-HSA-1474290	Collagen formation	-8.09276	-5.42197	14/76	1277,1278,1281,1289,1290,1293,1295,1306,4017,5118,5351,7373,80781,256076	COL1A1,COL1A2,COL3A1,COL5A1,COL5A2,COL6A3,COL8A1,COL15A1,LOXL2,PCOLCE,PLOD1,COL14A1,COL18A1,COL6A5
1_Member	GO Biological Processes	GO:0097435	supramolecular fiber organization	-7.53993	-4.94083	33/431	538,822,1277,1278,1281,1289,1290,1545,2059,2318,2331,3059,3855,3856,3925,3936,4017,4060,4082,4239,4643,5345,7018,7373,8076,9051,9938,11117,11151,22974,60681,81792,283431	ATP7A,CAPG,COL1A1,COL1A2,COL3A1,COL5A1,COL5A2,CYP1B1,EPS8,FLNC,FMOD,HCLS1,KRT7,KRT8,STMN1,LCP1,LOXL2,LUM,MARCKS,MFAP4,MYO1E,SERPINF2,TF,COL14A1,MFAP5,PSTPIP1,ARHGAP25,EMILIN1,CORO1A,TPX2,FKBP10,ADAMTS12,GAS2L3
1_Member	KEGG Pathway	hsa04974	Protein digestion and absorption	-6.51956	-4.17678	12/72	1277,1278,1281,1289,1290,1293,1295,1306,3783,7373,80781,256076	COL1A1,COL1A2,COL3A1,COL5A1,COL5A2,COL6A3,COL8A1,COL15A1,KCNN4,COL14A1,COL18A1,COL6A5
1_Member	Reactome Gene Sets	R-HSA-8875878	MET promotes cell motility	-5.31868	-3.24715	8/38	1277,1278,1281,1289,1290,2335,3908,64759	COL1A1,COL1A2,COL3A1,COL5A1,COL5A2,FN1,LAMA2,TNS3
1_Member	Reactome Gene Sets	R-HSA-8874081	MET activates PTK2 signaling	-5.24984	-3.18389	7/28	1277,1278,1281,1289,1290,2335,3908	COL1A1,COL1A2,COL3A1,COL5A1,COL5A2,FN1,LAMA2
1_Member	Reactome Gene Sets	R-HSA-6806834	Signaling by MET	-4.58484	-2.63048	10/76	1277,1278,1281,1289,1290,2335,3083,3908,5795,64759	COL1A1,COL1A2,COL3A1,COL5A1,COL5A2,FN1,HGFAC,LAMA2,PTPRJ,TNS3
1_Member	Reactome Gene Sets	R-HSA-186797	Signaling by PDGF	-3.27777	-1.61797	7/55	1281,1289,1290,1293,5340,6696,256076	COL3A1,COL5A1,COL5A2,COL6A3,PLG,SPP1,COL6A5
1_Member	GO Biological Processes	GO:0043588	skin development	-3.10601	-1.47863	12/156	538,1277,1278,1281,1289,1290,3855,3856,3925,9935,135228,151516	ATP7A,COL1A1,COL1A2,COL3A1,COL5A1,COL5A2,KRT7,KRT8,STMN1,MAFB,CD109,ASPRV1
1_Member	Reactome Gene Sets	R-HSA-419037	NCAM1 interactions	-2.9475	-1.35589	5/31	1281,1289,1290,1293,256076	COL3A1,COL5A1,COL5A2,COL6A3,COL6A5
1_Member	Reactome Gene Sets	R-HSA-375165	NCAM signaling for neurite out-growth	-2.0628	-0.667226	5/49	1281,1289,1290,1293,256076	COL3A1,COL5A1,COL5A2,COL6A3,COL6A5
1_Member	GO Biological Processes	GO:0071230	cellular response to amino acid stimulus	-2.04571	-0.656122	6/69	445,538,1277,1278,1281,1290	ASS1,ATP7A,COL1A1,COL1A2,COL3A1,COL5A2
2_Summary	GO Biological Processes	GO:0006954	inflammatory response	-15.2788	-11.494	43/386	2,12,101,197,336,445,719,727,728,929,968,1234,2335,2350,2353,2921,3557,3663,3684,3689,3700,3827,4064,4153,5265,5345,5743,6280,6382,6614,6696,6850,7099,7305,7852,9051,23646,29760,51284,51311,54209,55331,84868,1545,1958,2207,4060,4321,5788,5795,7805,8832,23705,467,3273,3482,7153,8091,9770,10537	A2M,SERPINA3,ADAM8,AHSG,APOA2,ASS1,C3AR1,C5,C5AR1,CD14,CD68,CCR5,FN1,FOLR2,FOS,CXCL3,IL1RN,IRF5,ITGAM,ITGB2,ITIH4,KNG1,CD180,MBL2,SERPINA1,SERPINF2,PTGS2,S100A9,SDC1,SIGLEC1,SPP1,SYK,TLR4,TYROBP,CXCR4,PSTPIP1,PLD3,BLNK,TLR7,TLR8,TREM2,ACER3,HAVCR2,CYP1B1,EGR1,FCER1G,LUM,MMP12,PTPRC,PTPRJ,LAPTM5,CD84,CADM1,ATF3,HRG,IGF2R,TOP2A,HMGA2,RASSF2,UBD
2_Member	GO Biological Processes	GO:0006954	inflammatory response	-15.2788	-11.494	43/386	2,12,101,197,336,445,719,727,728,929,968,1234,2335,2350,2353,2921,3557,3663,3684,3689,3700,3827,4064,4153,5265,5345,5743,6280,6382,6614,6696,6850,7099,7305,7852,9051,23646,29760,51284,51311,54209,55331,84868	A2M,SERPINA3,ADAM8,AHSG,APOA2,ASS1,C3AR1,C5,C5AR1,CD14,CD68,CCR5,FN1,FOLR2,FOS,CXCL3,IL1RN,IRF5,ITGAM,ITGB2,ITIH4,KNG1,CD180,MBL2,SERPINA1,SERPINF2,PTGS2,S100A9,SDC1,SIGLEC1,SPP1,SYK,TLR4,TYROBP,CXCR4,PSTPIP1,PLD3,BLNK,TLR7,TLR8,TREM2,ACER3,HAVCR2
2_Member	GO Biological Processes	GO:0001819	positive regulation of cytokine production	-5.75266	-3.59117	26/352	101,336,719,727,728,929,1545,1958,2207,3663,4060,4321,5345,5743,5788,5795,6850,7099,7305,7805,8832,23705,51284,51311,54209,84868	ADAM8,APOA2,C3AR1,C5,C5AR1,CD14,CYP1B1,EGR1,FCER1G,IRF5,LUM,MMP12,SERPINF2,PTGS2,PTPRC,PTPRJ,SYK,TLR4,TYROBP,LAPTM5,CD84,CADM1,TLR7,TLR8,TREM2,HAVCR2
2_Member	GO Biological Processes	GO:0010942	positive regulation of cell death	-2.16105	-0.746766	22/477	101,467,1545,1958,2353,3273,3482,3663,3684,3689,3827,5743,5788,6280,6850,7099,7153,7305,7805,8091,9770,10537	ADAM8,ATF3,CYP1B1,EGR1,FOS,HRG,IGF2R,IRF5,ITGAM,ITGB2,KNG1,PTGS2,PTPRC,S100A9,SYK,TLR4,TOP2A,TYROBP,LAPTM5,HMGA2,RASSF2,UBD
3_Summary	Reactome Gene Sets	R-HSA-381426	Regulation of Insulin-like Growth Factor (IGF) transport and uptake by Insulin-like Growth Factor Binding Proteins (IGFBPs)	-14.2746	-10.8636	22/98	197,335,336,338,462,2200,2243,2266,2335,3371,3827,5265,5340,5624,5954,6696,7018,10232,10970,11098,11167,116519	AHSG,APOA1,APOA2,APOB,SERPINC1,FBN1,FGA,FGG,FN1,TNC,KNG1,SERPINA1,PLG,PROC,RCN1,SPP1,TF,MSLN,CKAP4,PRSS23,FSTL1,APOA5
3_Member	Reactome Gene Sets	R-HSA-381426	Regulation of Insulin-like Growth Factor (IGF) transport and uptake by Insulin-like Growth Factor Binding Proteins (IGFBPs)	-14.2746	-10.8636	22/98	197,335,336,338,462,2200,2243,2266,2335,3371,3827,5265,5340,5624,5954,6696,7018,10232,10970,11098,11167,116519	AHSG,APOA1,APOA2,APOB,SERPINC1,FBN1,FGA,FGG,FN1,TNC,KNG1,SERPINA1,PLG,PROC,RCN1,SPP1,TF,MSLN,CKAP4,PRSS23,FSTL1,APOA5
3_Member	Reactome Gene Sets	R-HSA-8957275	Post-translational protein phosphorylation	-14.2224	-10.8636	21/88	197,335,336,338,462,2200,2243,2266,2335,3371,3827,5265,5624,5954,6696,7018,10232,10970,11098,11167,116519	AHSG,APOA1,APOA2,APOB,SERPINC1,FBN1,FGA,FGG,FN1,TNC,KNG1,SERPINA1,PROC,RCN1,SPP1,TF,MSLN,CKAP4,PRSS23,FSTL1,APOA5
4_Summary	KEGG Pathway	hsa04610	Complement and coagulation cascades	-14.1639	-10.8563	19/69	2,462,719,727,728,2243,2244,2266,3075,3684,3687,3689,3827,4153,5265,5340,5345,5624,7448,1545,5743,4323,11117,54209,1234,2921,4852,7852,101,3071,3663,595,929,2168,7099,9663,1843,6688,7070,2015,5031,7482,10203	A2M,SERPINC1,C3AR1,C5,C5AR1,FGA,FGB,FGG,CFH,ITGAM,ITGAX,ITGB2,KNG1,MBL2,SERPINA1,PLG,SERPINF2,PROC,VTN,CYP1B1,PTGS2,MMP14,EMILIN1,TREM2,CCR5,CXCL3,NPY,CXCR4,ADAM8,NCKAP1L,IRF5,CCND1,CD14,FABP1,TLR4,LPIN2,DUSP1,SPI1,THY1,ADGRE1,P2RY6,WNT2B,CALCRL
4_Member	KEGG Pathway	hsa04610	Complement and coagulation cascades	-14.1639	-10.8563	19/69	2,462,719,727,728,2243,2244,2266,3075,3684,3687,3689,3827,4153,5265,5340,5345,5624,7448	A2M,SERPINC1,C3AR1,C5,C5AR1,FGA,FGB,FGG,CFH,ITGAM,ITGAX,ITGB2,KNG1,MBL2,SERPINA1,PLG,SERPINF2,PROC,VTN
4_Member	KEGG Pathway	hsa05150	Staphylococcus aureus infection	-5.63315	-3.49514	9/46	719,727,728,2266,3075,3684,3689,4153,5340	C3AR1,C5,C5AR1,FGG,CFH,ITGAM,ITGB2,MBL2,PLG
4_Member	GO Biological Processes	GO:0010575	positive regulation of vascular endothelial growth factor production	-3.67376	-1.92778	5/22	719,727,728,1545,5743	C3AR1,C5,C5AR1,CYP1B1,PTGS2
4_Member	GO Biological Processes	GO:1905521	regulation of macrophage migration	-3.66554	-1.9222	6/34	719,727,728,4323,11117,54209	C3AR1,C5,C5AR1,MMP14,EMILIN1,TREM2
4_Member	GO Biological Processes	GO:0010574	regulation of vascular endothelial growth factor production	-3.39681	-1.70366	5/25	719,727,728,1545,5743	C3AR1,C5,C5AR1,CYP1B1,PTGS2
4_Member	Reactome Gene Sets	R-HSA-166658	Complement cascade	-3.15042	-1.51593	6/42	719,727,728,3075,4153,7448	C3AR1,C5,C5AR1,CFH,MBL2,VTN
4_Member	Reactome Gene Sets	R-HSA-375276	Peptide ligand-binding receptors	-2.88753	-1.3143	8/82	719,727,728,1234,2921,3827,4852,7852	C3AR1,C5,C5AR1,CCR5,CXCL3,KNG1,NPY,CXCR4
4_Member	GO Biological Processes	GO:1902624	positive regulation of neutrophil migration	-2.72145	-1.1936	4/21	101,719,728,3071	ADAM8,C3AR1,C5AR1,NCKAP1L
4_Member	GO Biological Processes	GO:1905523	positive regulation of macrophage migration	-2.72145	-1.1936	4/21	719,728,4323,54209	C3AR1,C5AR1,MMP14,TREM2
4_Member	Reactome Gene Sets	R-HSA-977606	Regulation of Complement cascade	-2.64754	-1.13232	5/36	719,727,728,3075,7448	C3AR1,C5,C5AR1,CFH,VTN
4_Member	GO Biological Processes	GO:0032494	response to peptidoglycan	-2.60782	-1.1026	3/11	728,3663,54209	C5AR1,IRF5,TREM2
4_Member	KEGG Pathway	hsa04936	Alcoholic liver disease	-2.51034	-1.02007	9/115	595,719,727,728,929,2168,2921,7099,9663	CCND1,C3AR1,C5,C5AR1,CD14,FABP1,CXCL3,TLR4,LPIN2
4_Member	GO Biological Processes	GO:0002685	regulation of leukocyte migration	-2.36418	-0.909179	11/167	101,719,727,728,1843,3071,4323,6688,7070,11117,54209	ADAM8,C3AR1,C5,C5AR1,DUSP1,NCKAP1L,MMP14,SPI1,THY1,EMILIN1,TREM2
4_Member	GO Biological Processes	GO:0002687	positive regulation of leukocyte migration	-2.145	-0.733173	8/108	101,719,728,3071,4323,6688,7070,54209	ADAM8,C3AR1,C5AR1,NCKAP1L,MMP14,SPI1,THY1,TREM2
4_Member	Reactome Gene Sets	R-HSA-500792	GPCR ligand binding	-2.12642	-0.71711	12/205	719,727,728,1234,2015,2921,3827,4852,5031,7482,7852,10203	C3AR1,C5,C5AR1,CCR5,ADGRE1,CXCL3,KNG1,NPY,P2RY6,WNT2B,CXCR4,CALCRL
4_Member	GO Biological Processes	GO:0090023	positive regulation of neutrophil chemotaxis	-2.04303	-0.656122	3/17	719,728,3071	C3AR1,C5AR1,NCKAP1L
4_Member	GO Biological Processes	GO:1902622	regulation of neutrophil migration	-2.04018	-0.655697	4/32	101,719,728,3071	ADAM8,C3AR1,C5AR1,NCKAP1L
5_Summary	Reactome Gene Sets	R-HSA-6798695	Neutrophil degranulation	-12.3795	-9.15907	40/408	12,101,197,290,383,411,719,728,929,963,968,1794,2207,2990,3071,3074,3101,3482,3684,3685,3687,3689,5265,5269,5284,5788,5795,6280,6590,7276,7305,10970,11001,11025,23406,25797,138050,140885,160364,203068	SERPINA3,ADAM8,AHSG,ANPEP,ARG1,ARSB,C3AR1,C5AR1,CD14,CD53,CD68,DOCK2,FCER1G,GUSB,NCKAP1L,HEXB,HK3,IGF2R,ITGAM,ITGAV,ITGAX,ITGB2,SERPINA1,SERPINB6,PIGR,PTPRC,PTPRJ,S100A9,SLPI,TTR,TYROBP,CKAP4,SLC27A2,LILRB3,COTL1,QPCT,HGSNAT,SIRPA,CLEC12A,TUBB
5_Member	Reactome Gene Sets	R-HSA-6798695	Neutrophil degranulation	-12.3795	-9.15907	40/408	12,101,197,290,383,411,719,728,929,963,968,1794,2207,2990,3071,3074,3101,3482,3684,3685,3687,3689,5265,5269,5284,5788,5795,6280,6590,7276,7305,10970,11001,11025,23406,25797,138050,140885,160364,203068	SERPINA3,ADAM8,AHSG,ANPEP,ARG1,ARSB,C3AR1,C5AR1,CD14,CD53,CD68,DOCK2,FCER1G,GUSB,NCKAP1L,HEXB,HK3,IGF2R,ITGAM,ITGAV,ITGAX,ITGB2,SERPINA1,SERPINB6,PIGR,PTPRC,PTPRJ,S100A9,SLPI,TTR,TYROBP,CKAP4,SLC27A2,LILRB3,COTL1,QPCT,HGSNAT,SIRPA,CLEC12A,TUBB
6_Summary	Reactome Gene Sets	R-HSA-114608	Platelet degranulation	-10.4827	-7.425	20/120	2,12,197,335,350,2243,2244,2266,2335,3273,3699,3700,3827,5099,5265,5340,5341,5345,7018,135228,338,462,1277,1278,1794,2207,3684,3685,3687,3689,3832,5269,5624,6382,6850,7409,8832,9672,29127,54518,84617,140885,383,1192,1281,1289,2192,3083,3172,3371,4321,7099,7305,8529,8858,9315,26509,54209,60681,131566,538,595,1579,3783,3925,7448,11117,6696,7852,199731,8728	A2M,SERPINA3,AHSG,APOA1,APOH,FGA,FGB,FGG,FN1,HRG,ITIH3,ITIH4,KNG1,PCDH7,SERPINA1,PLG,PLEK,SERPINF2,TF,CD109,APOB,SERPINC1,COL1A1,COL1A2,DOCK2,FCER1G,ITGAM,ITGAV,ITGAX,ITGB2,KIF11,SERPINB6,PROC,SDC1,SYK,VAV1,CD84,SDC3,RACGAP1,APBB1IP,TUBB6,SIRPA,ARG1,CLIC1,COL3A1,COL5A1,FBLN1,HGFAC,HNF4A,TNC,MMP12,TLR4,TYROBP,CYP4F2,PROZ,NREP,MYOF,TREM2,FKBP10,DCBLD2,ATP7A,CCND1,CYP4A11,KCNN4,STMN1,VTN,EMILIN1,SPP…
6_Member	Reactome Gene Sets	R-HSA-114608	Platelet degranulation	-10.4827	-7.425	20/120	2,12,197,335,350,2243,2244,2266,2335,3273,3699,3700,3827,5099,5265,5340,5341,5345,7018,135228	A2M,SERPINA3,AHSG,APOA1,APOH,FGA,FGB,FGG,FN1,HRG,ITIH3,ITIH4,KNG1,PCDH7,SERPINA1,PLG,PLEK,SERPINF2,TF,CD109
6_Member	Reactome Gene Sets	R-HSA-109582	Hemostasis	-10.3772	-7.34582	42/514	2,12,197,335,338,350,462,1277,1278,1794,2207,2243,2244,2266,2335,3273,3684,3685,3687,3689,3699,3700,3827,3832,5099,5265,5269,5340,5341,5345,5624,6382,6850,7018,7409,8832,9672,29127,54518,84617,135228,140885	A2M,SERPINA3,AHSG,APOA1,APOB,APOH,SERPINC1,COL1A1,COL1A2,DOCK2,FCER1G,FGA,FGB,FGG,FN1,HRG,ITGAM,ITGAV,ITGAX,ITGB2,ITIH3,ITIH4,KNG1,KIF11,PCDH7,SERPINA1,SERPINB6,PLG,PLEK,SERPINF2,PROC,SDC1,SYK,TF,VAV1,CD84,SDC3,RACGAP1,APBB1IP,TUBB6,CD109,SIRPA
6_Member	Reactome Gene Sets	R-HSA-76005	Response to elevated platelet cytosolic Ca2+	-10.1489	-7.1669	20/125	2,12,197,335,350,2243,2244,2266,2335,3273,3699,3700,3827,5099,5265,5340,5341,5345,7018,135228	A2M,SERPINA3,AHSG,APOA1,APOH,FGA,FGB,FGG,FN1,HRG,ITIH3,ITIH4,KNG1,PCDH7,SERPINA1,PLG,PLEK,SERPINF2,TF,CD109
6_Member	GO Biological Processes	GO:0009611	response to wounding	-10.1277	-7.1669	34/360	350,383,462,1192,1277,1281,1289,2192,2243,2244,2266,2335,3083,3172,3273,3371,3827,4321,5265,5340,5341,5624,6382,6850,7099,7305,7409,8529,8858,9315,26509,54209,60681,131566	APOH,ARG1,SERPINC1,CLIC1,COL1A1,COL3A1,COL5A1,FBLN1,FGA,FGB,FGG,FN1,HGFAC,HNF4A,HRG,TNC,KNG1,MMP12,SERPINA1,PLG,PLEK,PROC,SDC1,SYK,TLR4,TYROBP,VAV1,CYP4F2,PROZ,NREP,MYOF,TREM2,FKBP10,DCBLD2
6_Member	GO Biological Processes	GO:0007596	blood coagulation	-9.61856	-6.71843	21/148	350,462,1192,1281,2192,2243,2244,2266,2335,3083,3172,3273,3827,5265,5340,5341,5624,6850,7409,8529,8858	APOH,SERPINC1,CLIC1,COL3A1,FBLN1,FGA,FGB,FGG,FN1,HGFAC,HNF4A,HRG,KNG1,SERPINA1,PLG,PLEK,PROC,SYK,VAV1,CYP4F2,PROZ
6_Member	GO Biological Processes	GO:0050817	coagulation	-9.61856	-6.71843	21/148	350,462,1192,1281,2192,2243,2244,2266,2335,3083,3172,3273,3827,5265,5340,5341,5624,6850,7409,8529,8858	APOH,SERPINC1,CLIC1,COL3A1,FBLN1,FGA,FGB,FGG,FN1,HGFAC,HNF4A,HRG,KNG1,SERPINA1,PLG,PLEK,PROC,SYK,VAV1,CYP4F2,PROZ
6_Member	GO Biological Processes	GO:0042060	wound healing	-9.57269	-6.69105	29/282	350,462,1192,1277,1281,1289,2192,2243,2244,2266,2335,3083,3172,3273,3827,4321,5265,5340,5341,5624,6382,6850,7099,7409,8529,8858,26509,60681,131566	APOH,SERPINC1,CLIC1,COL1A1,COL3A1,COL5A1,FBLN1,FGA,FGB,FGG,FN1,HGFAC,HNF4A,HRG,KNG1,MMP12,SERPINA1,PLG,PLEK,PROC,SDC1,SYK,TLR4,VAV1,CYP4F2,PROZ,MYOF,FKBP10,DCBLD2
6_Member	GO Biological Processes	GO:0007599	hemostasis	-9.39872	-6.5348	21/152	350,462,1192,1281,2192,2243,2244,2266,2335,3083,3172,3273,3827,5265,5340,5341,5624,6850,7409,8529,8858	APOH,SERPINC1,CLIC1,COL3A1,FBLN1,FGA,FGB,FGG,FN1,HGFAC,HNF4A,HRG,KNG1,SERPINA1,PLG,PLEK,PROC,SYK,VAV1,CYP4F2,PROZ
6_Member	Reactome Gene Sets	R-HSA-76002	Platelet activation, signaling and aggregation	-9.20078	-6.40771	26/238	2,12,197,335,350,1277,1278,2207,2243,2244,2266,2335,3273,3699,3700,3827,5099,5265,5340,5341,5345,6850,7018,7409,54518,135228	A2M,SERPINA3,AHSG,APOA1,APOH,COL1A1,COL1A2,FCER1G,FGA,FGB,FGG,FN1,HRG,ITIH3,ITIH4,KNG1,PCDH7,SERPINA1,PLG,PLEK,SERPINF2,SYK,TF,VAV1,APBB1IP,CD109
6_Member	GO Biological Processes	GO:0050878	regulation of body fluid levels	-9.17872	-6.40771	29/293	350,462,538,595,1192,1281,1579,2192,2243,2244,2266,2335,3083,3172,3273,3783,3827,3925,5265,5340,5341,5345,5624,6850,7409,7448,8529,8858,11117	APOH,SERPINC1,ATP7A,CCND1,CLIC1,COL3A1,CYP4A11,FBLN1,FGA,FGB,FGG,FN1,HGFAC,HNF4A,HRG,KCNN4,KNG1,STMN1,SERPINA1,PLG,PLEK,SERPINF2,PROC,SYK,VAV1,VTN,CYP4F2,PROZ,EMILIN1
6_Member	GO Biological Processes	GO:0030195	negative regulation of blood coagulation	-7.38985	-4.80924	10/39	350,2243,2244,2266,3273,3827,5340,5345,5624,7448	APOH,FGA,FGB,FGG,HRG,KNG1,PLG,SERPINF2,PROC,VTN
6_Member	GO Biological Processes	GO:0030193	regulation of blood coagulation	-7.3532	-4.79031	12/61	350,462,2243,2244,2266,3273,3827,5340,5345,5624,7448,11117	APOH,SERPINC1,FGA,FGB,FGG,HRG,KNG1,PLG,SERPINF2,PROC,VTN,EMILIN1
6_Member	GO Biological Processes	GO:1900047	negative regulation of hemostasis	-7.27499	-4.74048	10/40	350,2243,2244,2266,3273,3827,5340,5345,5624,7448	APOH,FGA,FGB,FGG,HRG,KNG1,PLG,SERPINF2,PROC,VTN
6_Member	GO Biological Processes	GO:1900046	regulation of hemostasis	-7.26994	-4.74048	12/62	350,462,2243,2244,2266,3273,3827,5340,5345,5624,7448,11117	APOH,SERPINC1,FGA,FGB,FGG,HRG,KNG1,PLG,SERPINF2,PROC,VTN,EMILIN1
6_Member	GO Biological Processes	GO:0050819	negative regulation of coagulation	-7.16363	-4.64996	10/41	350,2243,2244,2266,3273,3827,5340,5345,5624,7448	APOH,FGA,FGB,FGG,HRG,KNG1,PLG,SERPINF2,PROC,VTN
6_Member	GO Biological Processes	GO:0050818	regulation of coagulation	-7.10833	-4.62462	12/64	350,462,2243,2244,2266,3273,3827,5340,5345,5624,7448,11117	APOH,SERPINC1,FGA,FGB,FGG,HRG,KNG1,PLG,SERPINF2,PROC,VTN,EMILIN1
6_Member	GO Biological Processes	GO:1903034	regulation of response to wounding	-7.01391	-4.53738	17/137	350,462,538,2243,2244,2266,3273,3827,5340,5345,5624,6696,7448,7852,11117,135228,199731	APOH,SERPINC1,ATP7A,FGA,FGB,FGG,HRG,KNG1,PLG,SERPINF2,PROC,SPP1,VTN,CXCR4,EMILIN1,CD109,CADM4
6_Member	GO Biological Processes	GO:1903035	negative regulation of response to wounding	-6.73035	-4.301	12/69	350,2243,2244,2266,3273,3827,5340,5345,5624,6696,7448,135228	APOH,FGA,FGB,FGG,HRG,KNG1,PLG,SERPINF2,PROC,SPP1,VTN,CD109
6_Member	GO Biological Processes	GO:0061041	regulation of wound healing	-6.69576	-4.28672	15/112	350,462,2243,2244,2266,3273,3827,5340,5345,5624,7448,7852,11117,135228,199731	APOH,SERPINC1,FGA,FGB,FGG,HRG,KNG1,PLG,SERPINF2,PROC,VTN,CXCR4,EMILIN1,CD109,CADM4
6_Member	GO Biological Processes	GO:0061045	negative regulation of wound healing	-6.61644	-4.24107	11/58	350,2243,2244,2266,3273,3827,5340,5345,5624,7448,135228	APOH,FGA,FGB,FGG,HRG,KNG1,PLG,SERPINF2,PROC,VTN,CD109
6_Member	GO Biological Processes	GO:0042730	fibrinolysis	-6.12543	-3.87989	6/14	2243,2244,2266,3273,5340,5345	FGA,FGB,FGG,HRG,PLG,SERPINF2
6_Member	GO Biological Processes	GO:0051918	negative regulation of fibrinolysis	-4.90079	-2.87154	5/13	350,3273,5340,5345,7448	APOH,HRG,PLG,SERPINF2,VTN
6_Member	GO Biological Processes	GO:0051917	regulation of fibrinolysis	-4.3981	-2.50174	5/16	350,3273,5340,5345,7448	APOH,HRG,PLG,SERPINF2,VTN
6_Member	GO Biological Processes	GO:0030194	positive regulation of blood coagulation	-4.25619	-2.39398	6/27	350,3273,5340,5345,7448,11117	APOH,HRG,PLG,SERPINF2,VTN,EMILIN1
6_Member	GO Biological Processes	GO:1900048	positive regulation of hemostasis	-4.25619	-2.39398	6/27	350,3273,5340,5345,7448,11117	APOH,HRG,PLG,SERPINF2,VTN,EMILIN1
6_Member	GO Biological Processes	GO:0050820	positive regulation of coagulation	-4.161	-2.32402	6/28	350,3273,5340,5345,7448,11117	APOH,HRG,PLG,SERPINF2,VTN,EMILIN1
6_Member	Reactome Gene Sets	R-HSA-75205	Dissolution of Fibrin Clot	-3.72342	-1.96942	4/12	3273,5269,5340,5345	HRG,SERPINB6,PLG,SERPINF2
6_Member	GO Biological Processes	GO:1903036	positive regulation of response to wounding	-3.5704	-1.83874	8/65	350,538,3273,5340,5345,7448,7852,11117	APOH,ATP7A,HRG,PLG,SERPINF2,VTN,CXCR4,EMILIN1
6_Member	GO Biological Processes	GO:0090303	positive regulation of wound healing	-3.32724	-1.65644	7/54	350,3273,5340,5345,7448,7852,11117	APOH,HRG,PLG,SERPINF2,VTN,CXCR4,EMILIN1
6_Member	GO Biological Processes	GO:2000047	regulation of cell-cell adhesion mediated by cadherin	-2.04303	-0.656122	3/17	5340,5345,8728	PLG,SERPINF2,ADAM19
7_Summary	GO Biological Processes	GO:0030155	regulation of cell adhesion	-10.2005	-7.19394	46/608	101,335,383,445,1277,1295,1545,1601,1843,2192,2243,2244,2266,2267,2335,3071,3273,3371,3557,3685,3689,3827,3908,4321,4323,4852,5340,5345,5788,5795,6688,6850,7070,7409,7448,7805,7852,8728,9404,11006,11117,11151,23654,54518,84868,140885,2200,3949,4124,5624,6696,7274,7305,54209,2059,3074,5168	ADAM8,APOA1,ARG1,ASS1,COL1A1,COL8A1,CYP1B1,DAB2,DUSP1,FBLN1,FGA,FGB,FGG,FGL1,FN1,NCKAP1L,HRG,TNC,IL1RN,ITGAV,ITGB2,KNG1,LAMA2,MMP12,MMP14,NPY,PLG,SERPINF2,PTPRC,PTPRJ,SPI1,SYK,THY1,VAV1,VTN,LAPTM5,CXCR4,ADAM19,LPXN,LILRB4,EMILIN1,CORO1A,PLXNB2,APBB1IP,HAVCR2,SIRPA,FBN1,LDLR,MAN2A1,PROC,SPP1,TTPA,TYROBP,TREM2,EPS8,HEXB,ENPP2
7_Member	GO Biological Processes	GO:0030155	regulation of cell adhesion	-10.2005	-7.19394	46/608	101,335,383,445,1277,1295,1545,1601,1843,2192,2243,2244,2266,2267,2335,3071,3273,3371,3557,3685,3689,3827,3908,4321,4323,4852,5340,5345,5788,5795,6688,6850,7070,7409,7448,7805,7852,8728,9404,11006,11117,11151,23654,54518,84868,140885	ADAM8,APOA1,ARG1,ASS1,COL1A1,COL8A1,CYP1B1,DAB2,DUSP1,FBLN1,FGA,FGB,FGG,FGL1,FN1,NCKAP1L,HRG,TNC,IL1RN,ITGAV,ITGB2,KNG1,LAMA2,MMP12,MMP14,NPY,PLG,SERPINF2,PTPRC,PTPRJ,SPI1,SYK,THY1,VAV1,VTN,LAPTM5,CXCR4,ADAM19,LPXN,LILRB4,EMILIN1,CORO1A,PLXNB2,APBB1IP,HAVCR2,SIRPA
7_Member	GO Biological Processes	GO:0045785	positive regulation of cell adhesion	-6.03554	-3.81111	27/362	101,335,1295,1601,2243,2244,2266,2335,3071,3273,3685,3689,3908,4852,5345,5788,5795,6850,7070,7409,8728,11006,11117,11151,54518,84868,140885	ADAM8,APOA1,COL8A1,DAB2,FGA,FGB,FGG,FN1,NCKAP1L,HRG,ITGAV,ITGB2,LAMA2,NPY,SERPINF2,PTPRC,PTPRJ,SYK,THY1,VAV1,ADAM19,LILRB4,EMILIN1,CORO1A,APBB1IP,HAVCR2,SIRPA
7_Member	GO Biological Processes	GO:0010810	regulation of cell-substrate adhesion	-5.20044	-3.1427	17/184	335,1277,1295,1601,2192,2243,2244,2266,2335,3273,4321,4323,4852,5340,5795,7070,11117	APOA1,COL1A1,COL8A1,DAB2,FBLN1,FGA,FGB,FGG,FN1,HRG,MMP12,MMP14,NPY,PLG,PTPRJ,THY1,EMILIN1
7_Member	GO Biological Processes	GO:0010811	positive regulation of cell-substrate adhesion	-4.75019	-2.75816	12/105	335,1295,1601,2243,2244,2266,2335,3273,4852,5795,7070,11117	APOA1,COL8A1,DAB2,FGA,FGB,FGG,FN1,HRG,NPY,PTPRJ,THY1,EMILIN1
7_Member	GO Biological Processes	GO:0060284	regulation of cell development	-2.05772	-0.66333	18/372	335,1601,2192,2200,2243,2244,2266,2335,3949,4124,5624,6696,7070,7274,7305,7852,23654,54209	APOA1,DAB2,FBLN1,FBN1,FGA,FGB,FGG,FN1,LDLR,MAN2A1,PROC,SPP1,THY1,TTPA,TYROBP,CXCR4,PLXNB2,TREM2
7_Member	GO Biological Processes	GO:0022604	regulation of cell morphogenesis	-2.02806	-0.644729	14/264	335,1601,2059,2192,2243,2244,2266,2335,3074,3689,5168,7852,11151,23654	APOA1,DAB2,EPS8,FBLN1,FGA,FGB,FGG,FN1,HEXB,ITGB2,ENPP2,CXCR4,CORO1A,PLXNB2
8_Summary	GO Biological Processes	GO:0008202	steroid metabolic process	-9.88753	-6.9479	25/205	335,336,338,1545,1548,1551,1557,1576,1577,1582,2538,2638,3931,3949,5444,6307,6696,6713,6721,7367,8608,10170,11001,55911,116519,538,1513,1579,5053,7274,7276,8529,55331,389434	APOA1,APOA2,APOB,CYP1B1,CYP2A6,CYP3A7,CYP2C19,CYP3A4,CYP3A5,CYP8B1,G6PC1,GC,LCAT,LDLR,PON1,MSMO1,SPP1,SQLE,SREBF2,UGT2B17,RDH16,DHRS9,SLC27A2,APOBR,APOA5,ATP7A,CTSK,CYP4A11,PAH,TTPA,TTR,CYP4F2,ACER3,IYD
8_Member	GO Biological Processes	GO:0008202	steroid metabolic process	-9.88753	-6.9479	25/205	335,336,338,1545,1548,1551,1557,1576,1577,1582,2538,2638,3931,3949,5444,6307,6696,6713,6721,7367,8608,10170,11001,55911,116519	APOA1,APOA2,APOB,CYP1B1,CYP2A6,CYP3A7,CYP2C19,CYP3A4,CYP3A5,CYP8B1,G6PC1,GC,LCAT,LDLR,PON1,MSMO1,SPP1,SQLE,SREBF2,UGT2B17,RDH16,DHRS9,SLC27A2,APOBR,APOA5
8_Member	GO Biological Processes	GO:1901615	organic hydroxy compound metabolic process	-6.70215	-4.28672	29/378	335,336,338,538,1513,1545,1551,1576,1577,1579,1582,2638,3931,3949,5053,5444,6307,6713,6721,7274,7276,8529,8608,10170,11001,55331,55911,116519,389434	APOA1,APOA2,APOB,ATP7A,CTSK,CYP1B1,CYP3A7,CYP3A4,CYP3A5,CYP4A11,CYP8B1,GC,LCAT,LDLR,PAH,PON1,MSMO1,SQLE,SREBF2,TTPA,TTR,CYP4F2,RDH16,DHRS9,SLC27A2,ACER3,APOBR,APOA5,IYD
8_Member	GO Biological Processes	GO:0016125	sterol metabolic process	-5.87004	-3.68736	14/113	335,336,338,1545,1576,1582,3931,3949,5444,6307,6713,6721,55911,116519	APOA1,APOA2,APOB,CYP1B1,CYP3A4,CYP8B1,LCAT,LDLR,PON1,MSMO1,SQLE,SREBF2,APOBR,APOA5
8_Member	GO Biological Processes	GO:0008203	cholesterol metabolic process	-4.8359	-2.82624	12/103	335,336,338,1576,3931,3949,5444,6307,6713,6721,55911,116519	APOA1,APOA2,APOB,CYP3A4,LCAT,LDLR,PON1,MSMO1,SQLE,SREBF2,APOBR,APOA5
8_Member	GO Biological Processes	GO:1902652	secondary alcohol metabolic process	-4.50537	-2.58593	12/111	335,336,338,1576,3931,3949,5444,6307,6713,6721,55911,116519	APOA1,APOA2,APOB,CYP3A4,LCAT,LDLR,PON1,MSMO1,SQLE,SREBF2,APOBR,APOA5
8_Member	GO Biological Processes	GO:0006066	alcohol metabolic process	-4.22165	-2.36803	19/263	335,336,338,1545,1551,1576,1577,3931,3949,5444,6307,6713,6721,7276,8608,10170,55331,55911,116519	APOA1,APOA2,APOB,CYP1B1,CYP3A7,CYP3A4,CYP3A5,LCAT,LDLR,PON1,MSMO1,SQLE,SREBF2,TTR,RDH16,DHRS9,ACER3,APOBR,APOA5
8_Member	GO Biological Processes	GO:0006694	steroid biosynthetic process	-2.42528	-0.955814	8/97	335,1551,1576,1582,6307,6713,11001,116519	APOA1,CYP3A7,CYP3A4,CYP8B1,MSMO1,SQLE,SLC27A2,APOA5
9_Summary	GO Biological Processes	GO:0002683	negative regulation of immune system process	-9.24668	-6.41619	31/329	2,259,335,336,383,727,968,1281,1843,2200,2267,3071,3949,4321,4852,5788,5795,6688,6850,7070,7099,7305,7805,8832,9404,9935,11006,11025,11117,54209,84868,101,350,719,728,3263,3273,4064,4153,5340,5345,5743,6280,7409,7448,7852,8792,23705,51284,51311,84699,445,1277,1545,2192,2266,3557,3827,4323,23654,563,3075,3684,3689,2243,2244,8728,11151,140885,2207,2335,5341	A2M,AMBP,APOA1,APOA2,ARG1,C5,CD68,COL3A1,DUSP1,FBN1,FGL1,NCKAP1L,LDLR,MMP12,NPY,PTPRC,PTPRJ,SPI1,SYK,THY1,TLR4,TYROBP,LAPTM5,CD84,LPXN,MAFB,LILRB4,LILRB3,EMILIN1,TREM2,HAVCR2,ADAM8,APOH,C3AR1,C5AR1,HPX,HRG,CD180,MBL2,PLG,SERPINF2,PTGS2,S100A9,VAV1,VTN,CXCR4,TNFRSF11A,CADM1,TLR7,TLR8,CREB3L3,ASS1,COL1A1,CYP1B1,FBLN1,FGG,IL1RN,KNG1,MMP14,PLXNB2,AZGP1,CFH,ITGAM,ITGB2,FGA,FGB,ADAM19,CORO1A,SIRPA,FCER…
9_Member	GO Biological Processes	GO:0002683	negative regulation of immune system process	-9.24668	-6.41619	31/329	2,259,335,336,383,727,968,1281,1843,2200,2267,3071,3949,4321,4852,5788,5795,6688,6850,7070,7099,7305,7805,8832,9404,9935,11006,11025,11117,54209,84868	A2M,AMBP,APOA1,APOA2,ARG1,C5,CD68,COL3A1,DUSP1,FBN1,FGL1,NCKAP1L,LDLR,MMP12,NPY,PTPRC,PTPRJ,SPI1,SYK,THY1,TLR4,TYROBP,LAPTM5,CD84,LPXN,MAFB,LILRB4,LILRB3,EMILIN1,TREM2,HAVCR2
9_Member	GO Biological Processes	GO:0032103	positive regulation of response to external stimulus	-9.19852	-6.40771	32/350	101,350,383,719,728,3071,3263,3273,3949,4064,4153,4321,4852,5340,5345,5743,6280,6688,6850,7099,7305,7409,7448,7852,8792,11117,23705,51284,51311,54209,84699,84868	ADAM8,APOH,ARG1,C3AR1,C5AR1,NCKAP1L,HPX,HRG,LDLR,CD180,MBL2,MMP12,NPY,PLG,SERPINF2,PTGS2,S100A9,SPI1,SYK,TLR4,TYROBP,VAV1,VTN,CXCR4,TNFRSF11A,EMILIN1,CADM1,TLR7,TLR8,TREM2,CREB3L3,HAVCR2
9_Member	GO Biological Processes	GO:0007162	negative regulation of cell adhesion	-7.33069	-4.78124	23/234	335,383,445,1277,1545,1843,2192,2266,2267,3071,3273,3557,3827,4321,4323,5340,5788,6688,7805,9404,11006,23654,84868	APOA1,ARG1,ASS1,COL1A1,CYP1B1,DUSP1,FBLN1,FGG,FGL1,NCKAP1L,HRG,IL1RN,KNG1,MMP12,MMP14,PLG,PTPRC,SPI1,LAPTM5,LPXN,LILRB4,PLXNB2,HAVCR2
9_Member	GO Biological Processes	GO:0031341	regulation of cell killing	-7.10833	-4.62462	12/64	383,563,3071,3075,3684,5788,6688,6850,7305,7409,23705,84868	ARG1,AZGP1,NCKAP1L,CFH,ITGAM,PTPRC,SPI1,SYK,TYROBP,VAV1,CADM1,HAVCR2
9_Member	GO Biological Processes	GO:0002697	regulation of immune effector process	-6.97725	-4.51474	24/264	2,335,336,383,563,3071,3075,3263,3684,3689,4153,5788,5795,6688,6850,7099,7305,7409,7805,8832,11006,23705,54209,84868	A2M,APOA1,APOA2,ARG1,AZGP1,NCKAP1L,CFH,HPX,ITGAM,ITGB2,MBL2,PTPRC,PTPRJ,SPI1,SYK,TLR4,TYROBP,VAV1,LAPTM5,CD84,LILRB4,CADM1,TREM2,HAVCR2
9_Member	GO Biological Processes	GO:0031343	positive regulation of cell killing	-6.60165	-4.23742	9/36	383,563,3684,5788,6688,6850,7305,7409,23705	ARG1,AZGP1,ITGAM,PTPRC,SPI1,SYK,TYROBP,VAV1,CADM1
9_Member	GO Biological Processes	GO:0031349	positive regulation of defense response	-6.33146	-4.02385	21/226	101,383,3263,3949,4153,4321,5743,6280,6688,6850,7099,7305,7409,8792,11117,23705,51284,51311,54209,84699,84868	ADAM8,ARG1,HPX,LDLR,MBL2,MMP12,PTGS2,S100A9,SPI1,SYK,TLR4,TYROBP,VAV1,TNFRSF11A,EMILIN1,CADM1,TLR7,TLR8,TREM2,CREB3L3,HAVCR2
9_Member	GO Biological Processes	GO:0002833	positive regulation of response to biotic stimulus	-6.22774	-3.93901	16/138	101,383,3263,3273,4064,4153,4321,6688,6850,7099,7305,7409,11117,23705,51311,84868	ADAM8,ARG1,HPX,HRG,CD180,MBL2,MMP12,SPI1,SYK,TLR4,TYROBP,VAV1,EMILIN1,CADM1,TLR8,HAVCR2
9_Member	GO Biological Processes	GO:0001910	regulation of leukocyte mediated cytotoxicity	-5.96507	-3.76011	10/54	383,563,3071,3684,5788,6688,7305,7409,23705,84868	ARG1,AZGP1,NCKAP1L,ITGAM,PTPRC,SPI1,TYROBP,VAV1,CADM1,HAVCR2
9_Member	GO Biological Processes	GO:0001912	positive regulation of leukocyte mediated cytotoxicity	-5.92682	-3.73684	8/32	383,563,3684,5788,6688,7305,7409,23705	ARG1,AZGP1,ITGAM,PTPRC,SPI1,TYROBP,VAV1,CADM1
9_Member	GO Biological Processes	GO:0002703	regulation of leukocyte mediated immunity	-5.66924	-3.52795	17/170	383,563,3071,3263,3684,3689,5788,6688,6850,7099,7305,7409,8832,11006,23705,54209,84868	ARG1,AZGP1,NCKAP1L,HPX,ITGAM,ITGB2,PTPRC,SPI1,SYK,TLR4,TYROBP,VAV1,CD84,LILRB4,CADM1,TREM2,HAVCR2
9_Member	GO Biological Processes	GO:0002699	positive regulation of immune effector process	-5.46209	-3.35556	17/176	383,563,3263,3684,3689,4153,5788,5795,6688,6850,7099,7305,7409,7805,8832,23705,54209	ARG1,AZGP1,HPX,ITGAM,ITGB2,MBL2,PTPRC,PTPRJ,SPI1,SYK,TLR4,TYROBP,VAV1,LAPTM5,CD84,CADM1,TREM2
9_Member	GO Biological Processes	GO:0022407	regulation of cell-cell adhesion	-4.82803	-2.82624	24/349	101,335,383,445,2243,2244,2266,2267,3071,3557,3689,5340,5345,5788,6688,6850,7070,7409,7805,8728,11006,11151,84868,140885	ADAM8,APOA1,ARG1,ASS1,FGA,FGB,FGG,FGL1,NCKAP1L,IL1RN,ITGB2,PLG,SERPINF2,PTPRC,SPI1,SYK,THY1,VAV1,LAPTM5,ADAM19,LILRB4,CORO1A,HAVCR2,SIRPA
9_Member	GO Biological Processes	GO:0050777	negative regulation of immune response	-4.66529	-2.69347	14/143	2,259,383,1281,3071,4321,4852,5788,6688,6850,8832,11006,54209,84868	A2M,AMBP,ARG1,COL3A1,NCKAP1L,MMP12,NPY,PTPRC,SPI1,SYK,CD84,LILRB4,TREM2,HAVCR2
9_Member	GO Biological Processes	GO:0045089	positive regulation of innate immune response	-4.585	-2.63048	12/109	101,3263,4153,4321,6688,6850,7099,7305,7409,23705,51311,84868	ADAM8,HPX,MBL2,MMP12,SPI1,SYK,TLR4,TYROBP,VAV1,CADM1,TLR8,HAVCR2
9_Member	GO Biological Processes	GO:0002705	positive regulation of leukocyte mediated immunity	-4.49788	-2.58373	11/94	383,563,3263,3684,3689,5788,6688,7305,7409,23705,54209	ARG1,AZGP1,HPX,ITGAM,ITGB2,PTPRC,SPI1,TYROBP,VAV1,CADM1,TREM2
9_Member	GO Biological Processes	GO:0045088	regulation of innate immune response	-4.45578	-2.55186	16/189	2,101,383,3075,3263,4153,4321,6688,6850,7099,7305,7409,23705,51311,54209,84868	A2M,ADAM8,ARG1,CFH,HPX,MBL2,MMP12,SPI1,SYK,TLR4,TYROBP,VAV1,CADM1,TLR8,TREM2,HAVCR2
9_Member	GO Biological Processes	GO:0050865	regulation of cell activation	-4.19951	-2.35246	28/482	101,383,2207,2266,2267,2335,3071,3273,3684,3689,3949,4323,5341,5788,6688,6850,7070,7099,7305,7409,7805,8832,11006,11117,11151,54209,84868,140885	ADAM8,ARG1,FCER1G,FGG,FGL1,FN1,NCKAP1L,HRG,ITGAM,ITGB2,LDLR,MMP14,PLEK,PTPRC,SPI1,SYK,THY1,TLR4,TYROBP,VAV1,LAPTM5,CD84,LILRB4,EMILIN1,CORO1A,TREM2,HAVCR2,SIRPA
9_Member	GO Biological Processes	GO:0002698	negative regulation of immune effector process	-4.03005	-2.21998	10/88	2,335,336,383,3071,5788,6688,8832,11006,84868	A2M,APOA1,APOA2,ARG1,NCKAP1L,PTPRC,SPI1,CD84,LILRB4,HAVCR2
9_Member	GO Biological Processes	GO:0050866	negative regulation of cell activation	-4.00822	-2.20272	14/164	383,2266,2267,3071,3949,5788,6688,7305,7805,8832,11006,11117,54209,84868	ARG1,FGG,FGL1,NCKAP1L,LDLR,PTPRC,SPI1,TYROBP,LAPTM5,CD84,LILRB4,EMILIN1,TREM2,HAVCR2
9_Member	GO Biological Processes	GO:0002831	regulation of response to biotic stimulus	-3.86135	-2.08237	19/280	2,101,383,3075,3263,3273,4064,4153,4321,6688,6850,7099,7305,7409,11117,23705,51311,54209,84868	A2M,ADAM8,ARG1,CFH,HPX,HRG,CD180,MBL2,MMP12,SPI1,SYK,TLR4,TYROBP,VAV1,EMILIN1,CADM1,TLR8,TREM2,HAVCR2
9_Member	GO Biological Processes	GO:0002704	negative regulation of leukocyte mediated immunity	-3.59314	-1.85891	7/49	383,3071,5788,6688,8832,11006,84868	ARG1,NCKAP1L,PTPRC,SPI1,CD84,LILRB4,HAVCR2
9_Member	GO Biological Processes	GO:0022409	positive regulation of cell-cell adhesion	-3.56546	-1.83635	16/225	101,2243,2244,2266,3071,3689,5345,5788,6850,7070,7409,8728,11006,11151,84868,140885	ADAM8,FGA,FGB,FGG,NCKAP1L,ITGB2,SERPINF2,PTPRC,SYK,THY1,VAV1,ADAM19,LILRB4,CORO1A,HAVCR2,SIRPA
9_Member	GO Biological Processes	GO:0022408	negative regulation of cell-cell adhesion	-3.31044	-1.64673	12/148	335,383,445,2266,2267,3071,3557,5340,6688,7805,11006,84868	APOA1,ARG1,ASS1,FGG,FGL1,NCKAP1L,IL1RN,PLG,SPI1,LAPTM5,LILRB4,HAVCR2
9_Member	GO Biological Processes	GO:0002706	regulation of lymphocyte mediated immunity	-2.99438	-1.38862	10/118	383,563,3071,3263,5788,7409,11006,23705,54209,84868	ARG1,AZGP1,NCKAP1L,HPX,PTPRC,VAV1,LILRB4,CADM1,TREM2,HAVCR2
9_Member	GO Biological Processes	GO:0002710	negative regulation of T cell mediated immunity	-2.98604	-1.38599	4/18	383,3071,5788,11006	ARG1,NCKAP1L,PTPRC,LILRB4
9_Member	GO Biological Processes	GO:0002694	regulation of leukocyte activation	-2.9017	-1.3147	23/441	101,383,2267,2335,3071,3684,3689,3949,4323,5788,6688,6850,7070,7099,7305,7409,7805,8832,11006,11151,54209,84868,140885	ADAM8,ARG1,FGL1,FN1,NCKAP1L,ITGAM,ITGB2,LDLR,MMP14,PTPRC,SPI1,SYK,THY1,TLR4,TYROBP,VAV1,LAPTM5,CD84,LILRB4,CORO1A,TREM2,HAVCR2,SIRPA
9_Member	GO Biological Processes	GO:0002695	negative regulation of leukocyte activation	-2.89173	-1.3143	11/143	383,2267,3071,3949,5788,6688,7305,7805,8832,11006,84868	ARG1,FGL1,NCKAP1L,LDLR,PTPRC,SPI1,TYROBP,LAPTM5,CD84,LILRB4,HAVCR2
9_Member	GO Biological Processes	GO:0032703	negative regulation of interleukin-2 production	-2.80431	-1.24661	4/20	5788,7805,11006,84868	PTPRC,LAPTM5,LILRB4,HAVCR2
9_Member	GO Biological Processes	GO:0050867	positive regulation of cell activation	-2.80211	-1.24526	17/290	101,3071,3684,3689,4323,5341,5788,6850,7070,7099,7305,7409,11006,11151,54209,84868,140885	ADAM8,NCKAP1L,ITGAM,ITGB2,MMP14,PLEK,PTPRC,SYK,THY1,TLR4,TYROBP,VAV1,LILRB4,CORO1A,TREM2,HAVCR2,SIRPA
9_Member	GO Biological Processes	GO:0002696	positive regulation of leukocyte activation	-2.57327	-1.07259	16/279	101,3071,3684,3689,4323,5788,6850,7070,7099,7305,7409,11006,11151,54209,84868,140885	ADAM8,NCKAP1L,ITGAM,ITGB2,MMP14,PTPRC,SYK,THY1,TLR4,TYROBP,VAV1,LILRB4,CORO1A,TREM2,HAVCR2,SIRPA
9_Member	GO Biological Processes	GO:0002823	negative regulation of adaptive immune response based on somatic recombination of immune receptors built from immunoglobulin superfamily domains	-2.54164	-1.04842	5/38	383,3071,5788,11006,84868	ARG1,NCKAP1L,PTPRC,LILRB4,HAVCR2
9_Member	GO Biological Processes	GO:0002707	negative regulation of lymphocyte mediated immunity	-2.49125	-1.01166	5/39	383,3071,5788,11006,84868	ARG1,NCKAP1L,PTPRC,LILRB4,HAVCR2
9_Member	GO Biological Processes	GO:1903037	regulation of leukocyte cell-cell adhesion	-2.43854	-0.965556	15/262	101,383,445,2267,3071,3689,5788,6850,7070,7409,7805,11006,11151,84868,140885	ADAM8,ARG1,ASS1,FGL1,NCKAP1L,ITGB2,PTPRC,SYK,THY1,VAV1,LAPTM5,LILRB4,CORO1A,HAVCR2,SIRPA
9_Member	GO Biological Processes	GO:0032689	negative regulation of interferon-gamma production	-2.36831	-0.912635	4/26	7099,7805,11006,84868	TLR4,LAPTM5,LILRB4,HAVCR2
9_Member	GO Biological Processes	GO:0002820	negative regulation of adaptive immune response	-2.34928	-0.895638	5/42	383,3071,5788,11006,84868	ARG1,NCKAP1L,PTPRC,LILRB4,HAVCR2
9_Member	GO Biological Processes	GO:0051251	positive regulation of lymphocyte activation	-2.00463	-0.624727	13/239	101,3071,4323,5788,6850,7070,7099,7305,7409,11006,11151,84868,140885	ADAM8,NCKAP1L,MMP14,PTPRC,SYK,THY1,TLR4,TYROBP,VAV1,LILRB4,CORO1A,HAVCR2,SIRPA
10_Summary	GO Biological Processes	GO:0001775	cell activation	-8.97587	-6.23252	38/482	538,728,1192,1281,1794,1958,2207,2243,2244,2266,2335,3273,3684,3689,3936,4064,4852,5341,5730,5788,5795,6688,6850,7099,7163,7305,7409,7462,8832,9935,10537,11151,29760,50856,54209,54518,81501,84868,727,3075,4153,4239,51311,203068,7018,8792,135228,3059,3071,4643,7153,7482,8076,11006	ATP7A,C5AR1,CLIC1,COL3A1,DOCK2,EGR1,FCER1G,FGA,FGB,FGG,FN1,HRG,ITGAM,ITGB2,LCP1,CD180,NPY,PLEK,PTGDS,PTPRC,PTPRJ,SPI1,SYK,TLR4,TPD52,TYROBP,VAV1,LAT2,CD84,MAFB,UBD,CORO1A,BLNK,CLEC4A,TREM2,APBB1IP,DCSTAMP,HAVCR2,C5,CFH,MBL2,MFAP4,TLR8,TUBB,TF,TNFRSF11A,CD109,HCLS1,NCKAP1L,MYO1E,TOP2A,WNT2B,MFAP5,LILRB4
10_Member	GO Biological Processes	GO:0001775	cell activation	-8.97587	-6.23252	38/482	538,728,1192,1281,1794,1958,2207,2243,2244,2266,2335,3273,3684,3689,3936,4064,4852,5341,5730,5788,5795,6688,6850,7099,7163,7305,7409,7462,8832,9935,10537,11151,29760,50856,54209,54518,81501,84868	ATP7A,C5AR1,CLIC1,COL3A1,DOCK2,EGR1,FCER1G,FGA,FGB,FGG,FN1,HRG,ITGAM,ITGB2,LCP1,CD180,NPY,PLEK,PTGDS,PTPRC,PTPRJ,SPI1,SYK,TLR4,TPD52,TYROBP,VAV1,LAT2,CD84,MAFB,UBD,CORO1A,BLNK,CLEC4A,TREM2,APBB1IP,DCSTAMP,HAVCR2
10_Member	GO Biological Processes	GO:0002274	myeloid leukocyte activation	-7.79726	-5.16887	16/107	728,1794,2207,3684,3689,4852,5730,6688,6850,7099,7305,7462,10537,54209,81501,84868	C5AR1,DOCK2,FCER1G,ITGAM,ITGB2,NPY,PTGDS,SPI1,SYK,TLR4,TYROBP,LAT2,UBD,TREM2,DCSTAMP,HAVCR2
10_Member	GO Biological Processes	GO:0045321	leukocyte activation	-7.13976	-4.63378	30/382	538,728,1794,1958,2207,3684,3689,3936,4064,4852,5730,5788,5795,6688,6850,7099,7163,7305,7409,7462,8832,9935,10537,11151,29760,50856,54209,54518,81501,84868	ATP7A,C5AR1,DOCK2,EGR1,FCER1G,ITGAM,ITGB2,LCP1,CD180,NPY,PTGDS,PTPRC,PTPRJ,SPI1,SYK,TLR4,TPD52,TYROBP,VAV1,LAT2,CD84,MAFB,UBD,CORO1A,BLNK,CLEC4A,TREM2,APBB1IP,DCSTAMP,HAVCR2
10_Member	GO Biological Processes	GO:0002252	immune effector process	-6.28879	-3.99541	22/247	538,727,1794,2207,3075,3936,4064,4153,4239,5730,6688,6850,7099,7305,7409,7462,11151,51311,54209,54518,84868,203068	ATP7A,C5,DOCK2,FCER1G,CFH,LCP1,CD180,MBL2,MFAP4,PTGDS,SPI1,SYK,TLR4,TYROBP,VAV1,LAT2,CORO1A,TLR8,TREM2,APBB1IP,HAVCR2,TUBB
10_Member	GO Biological Processes	GO:0002366	leukocyte activation involved in immune response	-6.11263	-3.87524	15/124	538,1794,2207,3936,4064,5730,6688,6850,7099,7305,7462,11151,54209,54518,84868	ATP7A,DOCK2,FCER1G,LCP1,CD180,PTGDS,SPI1,SYK,TLR4,TYROBP,LAT2,CORO1A,TREM2,APBB1IP,HAVCR2
10_Member	GO Biological Processes	GO:0002263	cell activation involved in immune response	-5.93429	-3.74062	15/128	538,1794,2207,3936,4064,5730,6688,6850,7099,7305,7462,11151,54209,54518,84868	ATP7A,DOCK2,FCER1G,LCP1,CD180,PTGDS,SPI1,SYK,TLR4,TYROBP,LAT2,CORO1A,TREM2,APBB1IP,HAVCR2
10_Member	GO Biological Processes	GO:0002275	myeloid cell activation involved in immune response	-4.97548	-2.93634	8/42	1794,2207,5730,6850,7305,7462,54209,84868	DOCK2,FCER1G,PTGDS,SYK,TYROBP,LAT2,TREM2,HAVCR2
10_Member	GO Biological Processes	GO:0002521	leukocyte differentiation	-4.06909	-2.25284	19/270	538,1794,1958,2207,5788,5795,6688,6850,7018,7163,7305,7409,8792,9935,10537,29760,54209,81501,135228	ATP7A,DOCK2,EGR1,FCER1G,PTPRC,PTPRJ,SPI1,SYK,TF,TPD52,TYROBP,VAV1,TNFRSF11A,MAFB,UBD,BLNK,TREM2,DCSTAMP,CD109
10_Member	GO Biological Processes	GO:0046649	lymphocyte activation	-3.95032	-2.15385	20/299	538,1794,1958,2207,3936,4064,5788,5795,6688,6850,7099,7163,7409,7462,8832,9935,11151,29760,50856,54518	ATP7A,DOCK2,EGR1,FCER1G,LCP1,CD180,PTPRC,PTPRJ,SPI1,SYK,TLR4,TPD52,VAV1,LAT2,CD84,MAFB,CORO1A,BLNK,CLEC4A,APBB1IP
10_Member	GO Biological Processes	GO:0030097	hemopoiesis	-3.45951	-1.74543	26/480	538,1794,1958,2207,3059,3071,4643,5341,5788,5795,6688,6850,7018,7153,7163,7305,7409,7482,8076,8792,9935,10537,29760,54209,81501,135228	ATP7A,DOCK2,EGR1,FCER1G,HCLS1,NCKAP1L,MYO1E,PLEK,PTPRC,PTPRJ,SPI1,SYK,TF,TOP2A,TPD52,TYROBP,VAV1,WNT2B,MFAP5,TNFRSF11A,MAFB,UBD,BLNK,TREM2,DCSTAMP,CD109
10_Member	GO Biological Processes	GO:1903131	mononuclear cell differentiation	-3.28986	-1.62897	15/215	538,1794,1958,2207,5788,5795,6688,6850,7163,7409,9935,10537,29760,54209,81501	ATP7A,DOCK2,EGR1,FCER1G,PTPRC,PTPRJ,SPI1,SYK,TPD52,VAV1,MAFB,UBD,BLNK,TREM2,DCSTAMP
10_Member	GO Biological Processes	GO:0002520	immune system development	-3.21598	-1.57426	28/553	538,1794,1958,2207,3059,3071,4643,5341,5788,5795,6688,6850,7018,7153,7163,7305,7409,7482,8076,8792,9935,10537,11006,29760,54209,81501,84868,135228	ATP7A,DOCK2,EGR1,FCER1G,HCLS1,NCKAP1L,MYO1E,PLEK,PTPRC,PTPRJ,SPI1,SYK,TF,TOP2A,TPD52,TYROBP,VAV1,WNT2B,MFAP5,TNFRSF11A,MAFB,UBD,LILRB4,BLNK,TREM2,DCSTAMP,HAVCR2,CD109
10_Member	GO Biological Processes	GO:0048534	hematopoietic or lymphoid organ development	-2.9566	-1.36126	26/519	538,1794,1958,2207,3059,3071,4643,5341,5788,5795,6688,6850,7018,7153,7163,7305,7409,7482,8076,8792,9935,10537,29760,54209,81501,135228	ATP7A,DOCK2,EGR1,FCER1G,HCLS1,NCKAP1L,MYO1E,PLEK,PTPRC,PTPRJ,SPI1,SYK,TF,TOP2A,TPD52,TYROBP,VAV1,WNT2B,MFAP5,TNFRSF11A,MAFB,UBD,BLNK,TREM2,DCSTAMP,CD109
10_Member	GO Biological Processes	GO:0042110	T cell activation	-2.95206	-1.35765	13/185	538,1794,1958,2207,3936,5788,6688,6850,7409,8832,9935,50856,54518	ATP7A,DOCK2,EGR1,FCER1G,LCP1,PTPRC,SPI1,SYK,VAV1,CD84,MAFB,CLEC4A,APBB1IP
10_Member	GO Biological Processes	GO:0002285	lymphocyte activation involved in immune response	-2.88753	-1.3143	8/82	538,2207,3936,4064,6688,7099,11151,54518	ATP7A,FCER1G,LCP1,CD180,SPI1,TLR4,CORO1A,APBB1IP
10_Member	GO Biological Processes	GO:0030217	T cell differentiation	-2.48506	-1.00782	9/116	538,1794,1958,2207,5788,6688,6850,7409,9935	ATP7A,DOCK2,EGR1,FCER1G,PTPRC,SPI1,SYK,VAV1,MAFB
10_Member	GO Biological Processes	GO:0030098	lymphocyte differentiation	-2.43995	-0.966266	12/187	538,1794,1958,2207,5788,5795,6688,6850,7163,7409,9935,29760	ATP7A,DOCK2,EGR1,FCER1G,PTPRC,PTPRJ,SPI1,SYK,TPD52,VAV1,MAFB,BLNK
11_Summary	GO Biological Processes	GO:1905952	regulation of lipid localization	-8.80684	-6.08905	19/133	335,336,338,345,1579,1582,1601,3685,4481,5244,5444,6696,6721,6850,8529,8792,54209,114882,116519,411,1545,1557,1576,1962,2168,2274,2638,3074,3992,5730,5743,6307,6713,9663,11001,23646,27306,55331,64174,64850,79071	APOA1,APOA2,APOB,APOC3,CYP4A11,CYP8B1,DAB2,ITGAV,MSR1,ABCB4,PON1,SPP1,SREBF2,SYK,CYP4F2,TNFRSF11A,TREM2,OSBPL8,APOA5,ARSB,CYP1B1,CYP2C19,CYP3A4,EHHADH,FABP1,FHL2,GC,HEXB,FADS1,PTGDS,PTGS2,MSMO1,SQLE,LPIN2,SLC27A2,PLD3,HPGDS,ACER3,DPEP2,ETNPPL,ELOVL6
11_Member	GO Biological Processes	GO:1905952	regulation of lipid localization	-8.80684	-6.08905	19/133	335,336,338,345,1579,1582,1601,3685,4481,5244,5444,6696,6721,6850,8529,8792,54209,114882,116519	APOA1,APOA2,APOB,APOC3,CYP4A11,CYP8B1,DAB2,ITGAV,MSR1,ABCB4,PON1,SPP1,SREBF2,SYK,CYP4F2,TNFRSF11A,TREM2,OSBPL8,APOA5
11_Member	GO Biological Processes	GO:0032368	regulation of lipid transport	-7.79726	-5.16887	16/107	335,336,345,1579,1582,1601,3685,5244,5444,6696,6721,6850,8529,8792,54209,116519	APOA1,APOA2,APOC3,CYP4A11,CYP8B1,DAB2,ITGAV,ABCB4,PON1,SPP1,SREBF2,SYK,CYP4F2,TNFRSF11A,TREM2,APOA5
11_Member	GO Biological Processes	GO:1905954	positive regulation of lipid localization	-6.50027	-4.16615	13/86	335,338,1579,1582,1601,4481,5244,5444,6696,6721,8529,8792,54209	APOA1,APOB,CYP4A11,CYP8B1,DAB2,MSR1,ABCB4,PON1,SPP1,SREBF2,CYP4F2,TNFRSF11A,TREM2
11_Member	GO Biological Processes	GO:0032370	positive regulation of lipid transport	-5.20155	-3.1427	10/65	335,1579,1582,1601,5244,5444,6696,8529,8792,54209	APOA1,CYP4A11,CYP8B1,DAB2,ABCB4,PON1,SPP1,CYP4F2,TNFRSF11A,TREM2
11_Member	GO Biological Processes	GO:0032371	regulation of sterol transport	-4.89536	-2.87154	9/56	335,336,345,1582,5244,5444,6721,54209,116519	APOA1,APOA2,APOC3,CYP8B1,ABCB4,PON1,SREBF2,TREM2,APOA5
11_Member	GO Biological Processes	GO:0032374	regulation of cholesterol transport	-4.89536	-2.87154	9/56	335,336,345,1582,5244,5444,6721,54209,116519	APOA1,APOA2,APOC3,CYP8B1,ABCB4,PON1,SREBF2,TREM2,APOA5
11_Member	Reactome Gene Sets	R-HSA-556833	Metabolism of lipids	-3.27478	-1.61607	32/660	335,336,411,1545,1557,1576,1579,1582,1962,2168,2274,2638,3074,3992,5244,5444,5730,5743,6307,6713,6721,8529,9663,11001,23646,27306,55331,64174,64850,79071,114882,116519	APOA1,APOA2,ARSB,CYP1B1,CYP2C19,CYP3A4,CYP4A11,CYP8B1,EHHADH,FABP1,FHL2,GC,HEXB,FADS1,ABCB4,PON1,PTGDS,PTGS2,MSMO1,SQLE,SREBF2,CYP4F2,LPIN2,SLC27A2,PLD3,HPGDS,ACER3,DPEP2,ETNPPL,ELOVL6,OSBPL8,APOA5
11_Member	GO Biological Processes	GO:0032373	positive regulation of sterol transport	-2.76099	-1.21346	5/34	335,1582,5244,5444,54209	APOA1,CYP8B1,ABCB4,PON1,TREM2
11_Member	GO Biological Processes	GO:0032376	positive regulation of cholesterol transport	-2.76099	-1.21346	5/34	335,1582,5244,5444,54209	APOA1,CYP8B1,ABCB4,PON1,TREM2
11_Member	Reactome Gene Sets	R-HSA-1989781	PPARA activates gene expression	-2.58809	-1.08666	9/112	335,336,1579,2168,2274,3992,5244,6721,116519	APOA1,APOA2,CYP4A11,FABP1,FHL2,FADS1,ABCB4,SREBF2,APOA5
11_Member	Reactome Gene Sets	R-HSA-400206	Regulation of lipid metabolism by PPARalpha	-2.53594	-1.04346	9/114	335,336,1579,2168,2274,3992,5244,6721,116519	APOA1,APOA2,CYP4A11,FABP1,FHL2,FADS1,ABCB4,SREBF2,APOA5
12_Summary	GO Biological Processes	GO:0051346	negative regulation of hydrolase activity	-8.60734	-5.90179	27/272	2,12,197,259,335,336,345,462,727,1293,2168,2644,3071,3273,3697,3699,3700,3827,5265,5269,5345,5743,5997,6590,7448,9104,135228,445,2335,4153,2619,4130,143941,2192,5118,6280,6850,7805,101,1601,4323,54209,1843,5788,5795,7070,11006,80119	A2M,SERPINA3,AHSG,AMBP,APOA1,APOA2,APOC3,SERPINC1,C5,COL6A3,FABP1,GCHFR,NCKAP1L,HRG,ITIH1,ITIH3,ITIH4,KNG1,SERPINA1,SERPINB6,SERPINF2,PTGS2,RGS2,SLPI,VTN,RGN,CD109,ASS1,FN1,MBL2,GAS1,MAP1A,TTC36,FBLN1,PCOLCE,S100A9,SYK,LAPTM5,ADAM8,DAB2,MMP14,TREM2,DUSP1,PTPRC,PTPRJ,THY1,LILRB4,PIF1
12_Member	GO Biological Processes	GO:0051346	negative regulation of hydrolase activity	-8.60734	-5.90179	27/272	2,12,197,259,335,336,345,462,727,1293,2168,2644,3071,3273,3697,3699,3700,3827,5265,5269,5345,5743,5997,6590,7448,9104,135228	A2M,SERPINA3,AHSG,AMBP,APOA1,APOA2,APOC3,SERPINC1,C5,COL6A3,FABP1,GCHFR,NCKAP1L,HRG,ITIH1,ITIH3,ITIH4,KNG1,SERPINA1,SERPINB6,SERPINF2,PTGS2,RGS2,SLPI,VTN,RGN,CD109
12_Member	GO Biological Processes	GO:0010951	negative regulation of endopeptidase activity	-7.66256	-5.04754	20/172	2,12,197,259,462,727,1293,2168,3273,3697,3699,3700,3827,5265,5269,5345,5743,6590,7448,135228	A2M,SERPINA3,AHSG,AMBP,SERPINC1,C5,COL6A3,FABP1,HRG,ITIH1,ITIH3,ITIH4,KNG1,SERPINA1,SERPINB6,SERPINF2,PTGS2,SLPI,VTN,CD109
12_Member	GO Biological Processes	GO:0006953	acute-phase response	-7.65618	-5.04754	9/28	2,12,197,445,2335,3700,4153,5265,5345	A2M,SERPINA3,AHSG,ASS1,FN1,ITIH4,MBL2,SERPINA1,SERPINF2
12_Member	GO Biological Processes	GO:0010466	negative regulation of peptidase activity	-7.32709	-4.78124	20/180	2,12,197,259,462,727,1293,2168,3273,3697,3699,3700,3827,5265,5269,5345,5743,6590,7448,135228	A2M,SERPINA3,AHSG,AMBP,SERPINC1,C5,COL6A3,FABP1,HRG,ITIH1,ITIH3,ITIH4,KNG1,SERPINA1,SERPINB6,SERPINF2,PTGS2,SLPI,VTN,CD109
12_Member	GO Biological Processes	GO:0045861	negative regulation of proteolysis	-6.52631	-4.17827	23/259	2,12,197,259,462,727,1293,2168,2619,3273,3697,3699,3700,3827,4130,5265,5269,5345,5743,6590,7448,135228,143941	A2M,SERPINA3,AHSG,AMBP,SERPINC1,C5,COL6A3,FABP1,GAS1,HRG,ITIH1,ITIH3,ITIH4,KNG1,MAP1A,SERPINA1,SERPINB6,SERPINF2,PTGS2,SLPI,VTN,CD109,TTC36
12_Member	GO Biological Processes	GO:0002526	acute inflammatory response	-6.12472	-3.87989	10/52	2,12,197,336,445,2335,3700,4153,5265,5345	A2M,SERPINA3,AHSG,APOA2,ASS1,FN1,ITIH4,MBL2,SERPINA1,SERPINF2
12_Member	GO Biological Processes	GO:0052547	regulation of peptidase activity	-5.98725	-3.77461	26/342	2,12,197,259,462,727,1293,2168,2192,2335,3273,3697,3699,3700,3827,5118,5265,5269,5345,5743,6280,6590,6850,7448,7805,135228	A2M,SERPINA3,AHSG,AMBP,SERPINC1,C5,COL6A3,FABP1,FBLN1,FN1,HRG,ITIH1,ITIH3,ITIH4,KNG1,PCOLCE,SERPINA1,SERPINB6,SERPINF2,PTGS2,S100A9,SLPI,SYK,VTN,LAPTM5,CD109
12_Member	GO Biological Processes	GO:0052548	regulation of endopeptidase activity	-5.02404	-2.98229	23/317	2,12,197,259,462,727,1293,2168,3273,3697,3699,3700,3827,5265,5269,5345,5743,6280,6590,6850,7448,7805,135228	A2M,SERPINA3,AHSG,AMBP,SERPINC1,C5,COL6A3,FABP1,HRG,ITIH1,ITIH3,ITIH4,KNG1,SERPINA1,SERPINB6,SERPINF2,PTGS2,S100A9,SLPI,SYK,VTN,LAPTM5,CD109
12_Member	GO Biological Processes	GO:0030162	regulation of proteolysis	-4.75184	-2.75816	34/601	2,12,101,197,259,462,727,1293,1601,2168,2192,2335,2619,3273,3697,3699,3700,3827,4130,4323,5118,5265,5269,5345,5743,6280,6590,6850,7448,7805,9104,54209,135228,143941	A2M,SERPINA3,ADAM8,AHSG,AMBP,SERPINC1,C5,COL6A3,DAB2,FABP1,FBLN1,FN1,GAS1,HRG,ITIH1,ITIH3,ITIH4,KNG1,MAP1A,MMP14,PCOLCE,SERPINA1,SERPINB6,SERPINF2,PTGS2,S100A9,SLPI,SYK,VTN,LAPTM5,RGN,TREM2,CD109,TTC36
12_Member	GO Biological Processes	GO:0043086	negative regulation of catalytic activity	-4.31237	-2.43433	33/605	2,12,197,259,335,336,345,462,727,1293,1843,2168,2644,3071,3273,3697,3699,3700,3827,5265,5269,5345,5743,5788,5795,5997,6590,7070,7448,9104,11006,80119,135228	A2M,SERPINA3,AHSG,AMBP,APOA1,APOA2,APOC3,SERPINC1,C5,COL6A3,DUSP1,FABP1,GCHFR,NCKAP1L,HRG,ITIH1,ITIH3,ITIH4,KNG1,SERPINA1,SERPINB6,SERPINF2,PTGS2,PTPRC,PTPRJ,RGS2,SLPI,THY1,VTN,RGN,LILRB4,PIF1,CD109
13_Summary	GO Biological Processes	GO:0050778	positive regulation of immune response	-8.53057	-5.83691	31/352	101,563,719,727,728,2207,2533,3071,3075,3263,3273,3684,3689,3783,4153,4239,4321,5788,5795,6688,6850,7070,7099,7305,7409,7462,23705,29760,51311,54209,84868,929,5284,11006,51284,81035,118788,1234,2921,6280,7852,8792,11151,2059,2650,5340,140885,214,335,1794,3685,3908,4897,5168,9547,23654	ADAM8,AZGP1,C3AR1,C5,C5AR1,FCER1G,FYB1,NCKAP1L,CFH,HPX,HRG,ITGAM,ITGB2,KCNN4,MBL2,MFAP4,MMP12,PTPRC,PTPRJ,SPI1,SYK,THY1,TLR4,TYROBP,VAV1,LAT2,CADM1,BLNK,TLR8,TREM2,HAVCR2,CD14,PIGR,LILRB4,TLR7,COLEC12,PIK3AP1,CCR5,CXCL3,S100A9,CXCR4,TNFRSF11A,CORO1A,EPS8,GCNT1,PLG,SIRPA,ALCAM,APOA1,DOCK2,ITGAV,LAMA2,NRCAM,ENPP2,CXCL14,PLXNB2
13_Member	GO Biological Processes	GO:0050778	positive regulation of immune response	-8.53057	-5.83691	31/352	101,563,719,727,728,2207,2533,3071,3075,3263,3273,3684,3689,3783,4153,4239,4321,5788,5795,6688,6850,7070,7099,7305,7409,7462,23705,29760,51311,54209,84868	ADAM8,AZGP1,C3AR1,C5,C5AR1,FCER1G,FYB1,NCKAP1L,CFH,HPX,HRG,ITGAM,ITGB2,KCNN4,MBL2,MFAP4,MMP12,PTPRC,PTPRJ,SPI1,SYK,THY1,TLR4,TYROBP,VAV1,LAT2,CADM1,BLNK,TLR8,TREM2,HAVCR2
13_Member	GO Biological Processes	GO:0002764	immune response-regulating signaling pathway	-7.91008	-5.26101	23/218	719,728,929,2207,2533,3071,4153,5284,5788,5795,6850,7070,7099,7305,7409,7462,11006,29760,51284,51311,81035,84868,118788	C3AR1,C5AR1,CD14,FCER1G,FYB1,NCKAP1L,MBL2,PIGR,PTPRC,PTPRJ,SYK,THY1,TLR4,TYROBP,VAV1,LAT2,LILRB4,BLNK,TLR7,TLR8,COLEC12,HAVCR2,PIK3AP1
13_Member	GO Biological Processes	GO:0002768	immune response-regulating cell surface receptor signaling pathway	-6.05872	-3.82625	16/142	719,728,2207,2533,3071,4153,5284,5788,5795,6850,7070,7305,7409,7462,11006,29760	C3AR1,C5AR1,FCER1G,FYB1,NCKAP1L,MBL2,PIGR,PTPRC,PTPRJ,SYK,THY1,TYROBP,VAV1,LAT2,LILRB4,BLNK
13_Member	GO Biological Processes	GO:0030595	leukocyte chemotaxis	-5.78096	-3.60546	13/99	101,728,1234,2207,2921,3071,3689,6280,6850,7409,7852,8792,11151	ADAM8,C5AR1,CCR5,FCER1G,CXCL3,NCKAP1L,ITGB2,S100A9,SYK,VAV1,CXCR4,TNFRSF11A,CORO1A
13_Member	GO Biological Processes	GO:0050900	leukocyte migration	-5.77657	-3.60462	17/167	101,728,1234,2059,2207,2650,2921,3071,3689,5340,6280,6850,7409,7852,8792,11151,140885	ADAM8,C5AR1,CCR5,EPS8,FCER1G,GCNT1,CXCL3,NCKAP1L,ITGB2,PLG,S100A9,SYK,VAV1,CXCR4,TNFRSF11A,CORO1A,SIRPA
13_Member	GO Biological Processes	GO:0002253	activation of immune response	-5.76158	-3.59489	18/186	719,727,728,2207,2533,3071,3075,4153,4239,5788,5795,6850,7070,7099,7305,7409,7462,29760	C3AR1,C5,C5AR1,FCER1G,FYB1,NCKAP1L,CFH,MBL2,MFAP4,PTPRC,PTPRJ,SYK,THY1,TLR4,TYROBP,VAV1,LAT2,BLNK
13_Member	GO Biological Processes	GO:0006935	chemotaxis	-5.57209	-3.45011	26/360	101,214,335,719,727,728,1234,1794,2207,2921,3071,3273,3685,3689,3908,4897,5168,5795,6280,6850,7409,7852,8792,9547,11151,23654	ADAM8,ALCAM,APOA1,C3AR1,C5,C5AR1,CCR5,DOCK2,FCER1G,CXCL3,NCKAP1L,HRG,ITGAV,ITGB2,LAMA2,NRCAM,ENPP2,PTPRJ,S100A9,SYK,VAV1,CXCR4,TNFRSF11A,CXCL14,CORO1A,PLXNB2
13_Member	GO Biological Processes	GO:0042330	taxis	-5.57209	-3.45011	26/360	101,214,335,719,727,728,1234,1794,2207,2921,3071,3273,3685,3689,3908,4897,5168,5795,6280,6850,7409,7852,8792,9547,11151,23654	ADAM8,ALCAM,APOA1,C3AR1,C5,C5AR1,CCR5,DOCK2,FCER1G,CXCL3,NCKAP1L,HRG,ITGAV,ITGB2,LAMA2,NRCAM,ENPP2,PTPRJ,S100A9,SYK,VAV1,CXCR4,TNFRSF11A,CXCL14,CORO1A,PLXNB2
13_Member	GO Biological Processes	GO:0002429	immune response-activating cell surface receptor signaling pathway	-5.46799	-3.35842	14/122	719,728,2207,2533,3071,4153,5788,5795,6850,7070,7305,7409,7462,29760	C3AR1,C5AR1,FCER1G,FYB1,NCKAP1L,MBL2,PTPRC,PTPRJ,SYK,THY1,TYROBP,VAV1,LAT2,BLNK
13_Member	GO Biological Processes	GO:0002757	immune response-activating signal transduction	-5.46799	-3.35842	14/122	719,728,2207,2533,3071,4153,5788,5795,6850,7070,7305,7409,7462,29760	C3AR1,C5AR1,FCER1G,FYB1,NCKAP1L,MBL2,PTPRC,PTPRJ,SYK,THY1,TYROBP,VAV1,LAT2,BLNK
13_Member	GO Biological Processes	GO:0060326	cell chemotaxis	-5.14125	-3.09158	15/148	101,727,728,1234,2207,2921,3071,3689,6280,6850,7409,7852,8792,9547,11151	ADAM8,C5,C5AR1,CCR5,FCER1G,CXCL3,NCKAP1L,ITGB2,S100A9,SYK,VAV1,CXCR4,TNFRSF11A,CXCL14,CORO1A
13_Member	GO Biological Processes	GO:0097529	myeloid leukocyte migration	-4.38808	-2.49358	10/80	728,2207,2921,3071,3689,6280,6850,7409,8792,140885	C5AR1,FCER1G,CXCL3,NCKAP1L,ITGB2,S100A9,SYK,VAV1,TNFRSF11A,SIRPA
13_Member	GO Biological Processes	GO:0030593	neutrophil chemotaxis	-4.3321	-2.45045	8/51	728,2207,2921,3071,3689,6280,6850,7409	C5AR1,FCER1G,CXCL3,NCKAP1L,ITGB2,S100A9,SYK,VAV1
13_Member	GO Biological Processes	GO:0071621	granulocyte chemotaxis	-4.14834	-2.31461	8/54	728,2207,2921,3071,3689,6280,6850,7409	C5AR1,FCER1G,CXCL3,NCKAP1L,ITGB2,S100A9,SYK,VAV1
13_Member	GO Biological Processes	GO:1990266	neutrophil migration	-3.86879	-2.08694	8/59	728,2207,2921,3071,3689,6280,6850,7409	C5AR1,FCER1G,CXCL3,NCKAP1L,ITGB2,S100A9,SYK,VAV1
13_Member	GO Biological Processes	GO:0097530	granulocyte migration	-3.66583	-1.9222	8/63	728,2207,2921,3071,3689,6280,6850,7409	C5AR1,FCER1G,CXCL3,NCKAP1L,ITGB2,S100A9,SYK,VAV1
14_Summary	GO Biological Processes	GO:1901605	alpha-amino acid metabolic process	-8.21973	-5.53766	21/176	383,445,538,586,635,3081,3172,3242,4143,5053,6898,10157,10165,10841,23498,23743,27232,51268,64577,143941,389434,51733,1579,1962,5444,8529,9663,11001,339,1576,3101,191,1152,29958	ARG1,ASS1,ATP7A,BCAT1,BHMT,HGD,HNF4A,HPD,MAT1A,PAH,TAT,AASS,SLC25A13,FTCD,HAAO,BHMT2,GNMT,PIPOX,ALDH8A1,TTC36,IYD,UPB1,CYP4A11,EHHADH,PON1,CYP4F2,LPIN2,SLC27A2,APOBEC1,CYP3A4,HK3,AHCY,CKB,DMGDH
14_Member	GO Biological Processes	GO:1901605	alpha-amino acid metabolic process	-8.21973	-5.53766	21/176	383,445,538,586,635,3081,3172,3242,4143,5053,6898,10157,10165,10841,23498,23743,27232,51268,64577,143941,389434	ARG1,ASS1,ATP7A,BCAT1,BHMT,HGD,HNF4A,HPD,MAT1A,PAH,TAT,AASS,SLC25A13,FTCD,HAAO,BHMT2,GNMT,PIPOX,ALDH8A1,TTC36,IYD
14_Member	GO Biological Processes	GO:0009072	aromatic amino acid family metabolic process	-7.00305	-4.53358	8/24	538,3081,3242,5053,6898,23498,143941,389434	ATP7A,HGD,HPD,PAH,TAT,HAAO,TTC36,IYD
14_Member	GO Biological Processes	GO:0006570	tyrosine metabolic process	-6.6181	-4.24107	6/12	3081,3242,5053,6898,143941,389434	HGD,HPD,PAH,TAT,TTC36,IYD
14_Member	GO Biological Processes	GO:0006520	cellular amino acid metabolic process	-6.02449	-3.80403	22/256	383,445,538,586,635,3081,3172,3242,4143,5053,6898,10157,10165,10841,23498,23743,27232,51268,51733,64577,143941,389434	ARG1,ASS1,ATP7A,BCAT1,BHMT,HGD,HNF4A,HPD,MAT1A,PAH,TAT,AASS,SLC25A13,FTCD,HAAO,BHMT2,GNMT,PIPOX,UPB1,ALDH8A1,TTC36,IYD
14_Member	GO Biological Processes	GO:0046395	carboxylic acid catabolic process	-4.61033	-2.64514	17/204	383,1579,1962,3081,3242,4143,5053,5444,6898,8529,9663,10157,10841,11001,23498,51268,64577	ARG1,CYP4A11,EHHADH,HGD,HPD,MAT1A,PAH,PON1,TAT,CYP4F2,LPIN2,AASS,FTCD,SLC27A2,HAAO,PIPOX,ALDH8A1
14_Member	GO Biological Processes	GO:0009074	aromatic amino acid family catabolic process	-4.5515	-2.60754	5/15	3081,3242,5053,6898,23498	HGD,HPD,PAH,TAT,HAAO
14_Member	GO Biological Processes	GO:0006558	L-phenylalanine metabolic process	-4.53696	-2.60754	4/8	3081,3242,5053,6898	HGD,HPD,PAH,TAT
14_Member	GO Biological Processes	GO:0006559	L-phenylalanine catabolic process	-4.53696	-2.60754	4/8	3081,3242,5053,6898	HGD,HPD,PAH,TAT
14_Member	GO Biological Processes	GO:1902221	erythrose 4-phosphate/phosphoenolpyruvate family amino acid metabolic process	-4.53696	-2.60754	4/8	3081,3242,5053,6898	HGD,HPD,PAH,TAT
14_Member	GO Biological Processes	GO:1902222	erythrose 4-phosphate/phosphoenolpyruvate family amino acid catabolic process	-4.53696	-2.60754	4/8	3081,3242,5053,6898	HGD,HPD,PAH,TAT
14_Member	GO Biological Processes	GO:0016054	organic acid catabolic process	-4.50208	-2.58461	17/208	383,1579,1962,3081,3242,4143,5053,5444,6898,8529,9663,10157,10841,11001,23498,51268,64577	ARG1,CYP4A11,EHHADH,HGD,HPD,MAT1A,PAH,PON1,TAT,CYP4F2,LPIN2,AASS,FTCD,SLC27A2,HAAO,PIPOX,ALDH8A1
14_Member	GO Biological Processes	GO:1901606	alpha-amino acid catabolic process	-4.24861	-2.38816	10/83	383,3081,3242,4143,5053,6898,10157,23498,51268,64577	ARG1,HGD,HPD,MAT1A,PAH,TAT,AASS,HAAO,PIPOX,ALDH8A1
14_Member	GO Biological Processes	GO:0009063	cellular amino acid catabolic process	-4.24619	-2.38745	11/100	383,3081,3242,4143,5053,6898,10157,10841,23498,51268,64577	ARG1,HGD,HPD,MAT1A,PAH,TAT,AASS,FTCD,HAAO,PIPOX,ALDH8A1
14_Member	GO Biological Processes	GO:0044282	small molecule catabolic process	-4.19894	-2.35246	21/310	339,383,1576,1579,1962,3081,3101,3242,4143,5053,5444,6898,8529,9663,10157,10841,11001,23498,51268,51733,64577	APOBEC1,ARG1,CYP3A4,CYP4A11,EHHADH,HGD,HK3,HPD,MAT1A,PAH,PON1,TAT,CYP4F2,LPIN2,AASS,FTCD,SLC27A2,HAAO,PIPOX,UPB1,ALDH8A1
14_Member	Reactome Gene Sets	R-HSA-8963691	Phenylalanine and tyrosine metabolism	-3.89053	-2.10289	4/11	3081,3242,5053,6898	HGD,HPD,PAH,TAT
14_Member	Reactome Gene Sets	R-HSA-8963684	Tyrosine catabolism	-3.77467	-2.01112	3/5	3081,3242,6898	HGD,HPD,TAT
14_Member	GO Biological Processes	GO:0006572	tyrosine catabolic process	-3.4821	-1.76679	3/6	3081,3242,6898	HGD,HPD,TAT
14_Member	Reactome Gene Sets	R-HSA-71291	Metabolism of amino acids and derivatives	-3.25261	-1.60161	20/338	191,383,445,586,635,1152,3081,3242,4143,5053,6898,10157,10165,10841,23498,23743,27232,29958,51268,389434	AHCY,ARG1,ASS1,BCAT1,BHMT,CKB,HGD,HPD,MAT1A,PAH,TAT,AASS,SLC25A13,FTCD,HAAO,BHMT2,GNMT,DMGDH,PIPOX,IYD
14_Member	KEGG Pathway	hsa00360	Phenylalanine metabolism	-2.11901	-0.714481	3/16	3242,5053,6898	HPD,PAH,TAT
15_Summary	GO Biological Processes	GO:0120254	olefinic compound metabolic process	-7.97965	-5.31985	16/104	1545,1548,1551,1557,1572,1576,1577,1579,3992,5730,5743,7276,8529,8608,10170,64577,1582,5444,27306,64174,6850,7367,191,2328,4143,133688,11001,79071,2330,3172,57552,229,1962,3101,6307,9663,10841,23498,7852,336,383,445,595,1277,2353,3071	CYP1B1,CYP2A6,CYP3A7,CYP2C19,CYP2F1,CYP3A4,CYP3A5,CYP4A11,FADS1,PTGDS,PTGS2,TTR,CYP4F2,RDH16,DHRS9,ALDH8A1,CYP8B1,PON1,HPGDS,DPEP2,SYK,UGT2B17,AHCY,FMO3,MAT1A,UGT3A1,SLC27A2,ELOVL6,FMO5,HNF4A,NCEH1,ALDOB,EHHADH,HK3,MSMO1,LPIN2,FTCD,HAAO,CXCR4,APOA2,ARG1,ASS1,CCND1,COL1A1,FOS,NCKAP1L
15_Member	GO Biological Processes	GO:0120254	olefinic compound metabolic process	-7.97965	-5.31985	16/104	1545,1548,1551,1557,1572,1576,1577,1579,3992,5730,5743,7276,8529,8608,10170,64577	CYP1B1,CYP2A6,CYP3A7,CYP2C19,CYP2F1,CYP3A4,CYP3A5,CYP4A11,FADS1,PTGDS,PTGS2,TTR,CYP4F2,RDH16,DHRS9,ALDH8A1
15_Member	Reactome Gene Sets	R-HSA-211897	Cytochrome P450 - arranged by substrate type	-6.29215	-3.99541	10/50	1545,1548,1551,1557,1572,1576,1577,1579,1582,8529	CYP1B1,CYP2A6,CYP3A7,CYP2C19,CYP2F1,CYP3A4,CYP3A5,CYP4A11,CYP8B1,CYP4F2
15_Member	GO Biological Processes	GO:0019373	epoxygenase P450 pathway	-6.12543	-3.87989	6/14	1545,1548,1557,1572,1579,8529	CYP1B1,CYP2A6,CYP2C19,CYP2F1,CYP4A11,CYP4F2
15_Member	Reactome Gene Sets	R-HSA-2142753	Arachidonic acid metabolism	-6.12472	-3.87989	10/52	1545,1557,1579,1582,5444,5730,5743,8529,27306,64174	CYP1B1,CYP2C19,CYP4A11,CYP8B1,PON1,PTGDS,PTGS2,CYP4F2,HPGDS,DPEP2
15_Member	GO Biological Processes	GO:0006690	icosanoid metabolic process	-5.71884	-3.56982	12/85	1545,1548,1557,1572,1579,3992,5730,5743,6850,8529,27306,64174	CYP1B1,CYP2A6,CYP2C19,CYP2F1,CYP4A11,FADS1,PTGDS,PTGS2,SYK,CYP4F2,HPGDS,DPEP2
15_Member	Reactome Gene Sets	R-HSA-211981	Xenobiotics	-5.71866	-3.56982	6/16	1548,1551,1557,1572,1576,1577	CYP2A6,CYP3A7,CYP2C19,CYP2F1,CYP3A4,CYP3A5
15_Member	KEGG Pathway	hsa05204	Chemical carcinogenesis - DNA adducts	-5.71774	-3.56982	9/45	1545,1548,1551,1557,1576,1577,5743,7367,27306	CYP1B1,CYP2A6,CYP3A7,CYP2C19,CYP3A4,CYP3A5,PTGS2,UGT2B17,HPGDS
15_Member	Reactome Gene Sets	R-HSA-211859	Biological oxidations	-5.53005	-3.41433	17/174	191,1545,1548,1551,1557,1572,1576,1577,1579,1582,2328,4143,7367,8529,27306,64174,133688	AHCY,CYP1B1,CYP2A6,CYP3A7,CYP2C19,CYP2F1,CYP3A4,CYP3A5,CYP4A11,CYP8B1,FMO3,MAT1A,UGT2B17,CYP4F2,HPGDS,DPEP2,UGT3A1
15_Member	GO Biological Processes	GO:0001676	long-chain fatty acid metabolic process	-5.34925	-3.26924	12/92	1545,1548,1557,1572,1576,1579,3992,5730,5743,8529,11001,79071	CYP1B1,CYP2A6,CYP2C19,CYP2F1,CYP3A4,CYP4A11,FADS1,PTGDS,PTGS2,CYP4F2,SLC27A2,ELOVL6
15_Member	GO Biological Processes	GO:0006805	xenobiotic metabolic process	-5.34083	-3.26367	11/77	1545,1548,1551,1557,1572,1576,1577,2330,3172,8529,57552	CYP1B1,CYP2A6,CYP3A7,CYP2C19,CYP2F1,CYP3A4,CYP3A5,FMO5,HNF4A,CYP4F2,NCEH1
15_Member	GO Biological Processes	GO:0033559	unsaturated fatty acid metabolic process	-5.12241	-3.07539	11/81	1545,1548,1557,1572,1579,3992,5730,5743,8529,27306,79071	CYP1B1,CYP2A6,CYP2C19,CYP2F1,CYP4A11,FADS1,PTGDS,PTGS2,CYP4F2,HPGDS,ELOVL6
15_Member	GO Biological Processes	GO:0019369	arachidonic acid metabolic process	-4.89593	-2.87154	8/43	1545,1548,1557,1572,1579,5730,5743,8529	CYP1B1,CYP2A6,CYP2C19,CYP2F1,CYP4A11,PTGDS,PTGS2,CYP4F2
15_Member	Reactome Gene Sets	R-HSA-211945	Phase I - Functionalization of compounds	-4.86792	-2.84661	11/86	1545,1548,1551,1557,1572,1576,1577,1579,1582,2328,8529	CYP1B1,CYP2A6,CYP3A7,CYP2C19,CYP2F1,CYP3A4,CYP3A5,CYP4A11,CYP8B1,FMO3,CYP4F2
15_Member	Reactome Gene Sets	R-HSA-2142816	Synthesis of (16-20)-hydroxyeicosatetraenoic acids (HETE)	-4.53696	-2.60754	4/8	1545,1557,1579,8529	CYP1B1,CYP2C19,CYP4A11,CYP4F2
15_Member	KEGG Pathway	hsa00982	Drug metabolism - cytochrome P450	-4.46225	-2.55433	8/49	1548,1557,1576,1577,2328,2330,7367,27306	CYP2A6,CYP2C19,CYP3A4,CYP3A5,FMO3,FMO5,UGT2B17,HPGDS
15_Member	GO Biological Processes	GO:0032787	monocarboxylic acid metabolic process	-4.32294	-2.4431	26/424	229,1545,1548,1551,1557,1572,1576,1577,1579,1582,1962,3101,3992,5730,5743,6307,7367,8529,9663,10170,10841,11001,23498,27306,64577,79071	ALDOB,CYP1B1,CYP2A6,CYP3A7,CYP2C19,CYP2F1,CYP3A4,CYP3A5,CYP4A11,CYP8B1,EHHADH,HK3,FADS1,PTGDS,PTGS2,MSMO1,UGT2B17,CYP4F2,LPIN2,DHRS9,FTCD,SLC27A2,HAAO,HPGDS,ALDH8A1,ELOVL6
15_Member	GO Biological Processes	GO:0097267	omega-hydroxylase P450 pathway	-4.29069	-2.418	4/9	1545,1557,1579,8529	CYP1B1,CYP2C19,CYP4A11,CYP4F2
15_Member	Reactome Gene Sets	R-HSA-8978868	Fatty acid metabolism	-4.00822	-2.20272	14/164	1545,1557,1579,1582,1962,3992,5444,5730,5743,8529,11001,27306,64174,79071	CYP1B1,CYP2C19,CYP4A11,CYP8B1,EHHADH,FADS1,PON1,PTGDS,PTGS2,CYP4F2,SLC27A2,HPGDS,DPEP2,ELOVL6
15_Member	GO Biological Processes	GO:0071466	cellular response to xenobiotic stimulus	-3.99677	-2.1943	12/125	1545,1548,1551,1557,1572,1576,1577,2330,3172,7852,8529,57552	CYP1B1,CYP2A6,CYP3A7,CYP2C19,CYP2F1,CYP3A4,CYP3A5,FMO5,HNF4A,CXCR4,CYP4F2,NCEH1
15_Member	GO Biological Processes	GO:0009410	response to xenobiotic stimulus	-3.53986	-1.81456	20/321	336,383,445,595,1277,1545,1548,1551,1557,1572,1576,1577,2330,2353,3071,3172,5743,7852,8529,57552	APOA2,ARG1,ASS1,CCND1,COL1A1,CYP1B1,CYP2A6,CYP3A7,CYP2C19,CYP2F1,CYP3A4,CYP3A5,FMO5,FOS,NCKAP1L,HNF4A,PTGS2,CXCR4,CYP4F2,NCEH1
15_Member	KEGG Pathway	hsa00980	Metabolism of xenobiotics by cytochrome P450	-3.42973	-1.72418	7/52	1545,1548,1572,1576,1577,7367,27306	CYP1B1,CYP2A6,CYP2F1,CYP3A4,CYP3A5,UGT2B17,HPGDS
15_Member	Reactome Gene Sets	R-HSA-211999	CYP2E1 reactions	-3.24752	-1.60161	3/7	1548,1557,1572	CYP2A6,CYP2C19,CYP2F1
15_Member	GO Biological Processes	GO:0042178	xenobiotic catabolic process	-2.8923	-1.3143	4/19	1548,1557,1576,1577	CYP2A6,CYP2C19,CYP3A4,CYP3A5
15_Member	GO Biological Processes	GO:0006631	fatty acid metabolic process	-2.52732	-1.03631	16/282	1545,1548,1557,1572,1576,1579,1962,3992,5730,5743,6307,8529,9663,11001,27306,79071	CYP1B1,CYP2A6,CYP2C19,CYP2F1,CYP3A4,CYP4A11,EHHADH,FADS1,PTGDS,PTGS2,MSMO1,CYP4F2,LPIN2,SLC27A2,HPGDS,ELOVL6
16_Summary	GO Biological Processes	GO:0007160	cell-matrix adhesion	-7.50722	-4.91746	16/112	1281,2243,2244,2266,2335,3681,3684,3685,3687,3689,6614,7070,7448,10232,11117,81792,335,2533,5341,6850,7409,9404,11151,2200,4897,5788,140885,214,6382,9672,23705,3071,3827,7852,128239	COL3A1,FGA,FGB,FGG,FN1,ITGAD,ITGAM,ITGAV,ITGAX,ITGB2,SIGLEC1,THY1,VTN,MSLN,EMILIN1,ADAMTS12,APOA1,FYB1,PLEK,SYK,VAV1,LPXN,CORO1A,FBN1,NRCAM,PTPRC,SIRPA,ALCAM,SDC1,SDC3,CADM1,NCKAP1L,KNG1,CXCR4,IQGAP3
16_Member	GO Biological Processes	GO:0007160	cell-matrix adhesion	-7.50722	-4.91746	16/112	1281,2243,2244,2266,2335,3681,3684,3685,3687,3689,6614,7070,7448,10232,11117,81792	COL3A1,FGA,FGB,FGG,FN1,ITGAD,ITGAM,ITGAV,ITGAX,ITGB2,SIGLEC1,THY1,VTN,MSLN,EMILIN1,ADAMTS12
16_Member	GO Biological Processes	GO:0007229	integrin-mediated signaling pathway	-6.68598	-4.28672	13/83	335,1281,2335,2533,3681,3684,3685,3687,3689,5341,6850,7070,7409	APOA1,COL3A1,FN1,FYB1,ITGAD,ITGAM,ITGAV,ITGAX,ITGB2,PLEK,SYK,THY1,VAV1
16_Member	GO Biological Processes	GO:0031589	cell-substrate adhesion	-6.65151	-4.25888	18/162	1281,2243,2244,2266,2335,3681,3684,3685,3687,3689,6614,7070,7448,9404,10232,11117,11151,81792	COL3A1,FGA,FGB,FGG,FN1,ITGAD,ITGAM,ITGAV,ITGAX,ITGB2,SIGLEC1,THY1,VTN,LPXN,MSLN,EMILIN1,CORO1A,ADAMTS12
16_Member	GO Biological Processes	GO:0033627	cell adhesion mediated by integrin	-5.31868	-3.24715	8/38	2200,3681,3684,3685,3687,3689,7448,11117	FBN1,ITGAD,ITGAM,ITGAV,ITGAX,ITGB2,VTN,EMILIN1
16_Member	GO Biological Processes	GO:0034113	heterotypic cell-cell adhesion	-4.83507	-2.82624	7/32	3681,3685,3687,3689,4897,5788,140885	ITGAD,ITGAV,ITGAX,ITGB2,NRCAM,PTPRC,SIRPA
16_Member	KEGG Pathway	hsa04514	Cell adhesion molecules	-3.63803	-1.89731	10/98	214,3684,3685,3689,4897,5788,6382,6614,9672,23705	ALCAM,ITGAM,ITGAV,ITGB2,NRCAM,PTPRC,SDC1,SIGLEC1,SDC3,CADM1
16_Member	KEGG Pathway	hsa04810	Regulation of actin cytoskeleton	-2.08958	-0.69082	11/182	2335,3071,3681,3684,3685,3687,3689,3827,7409,7852,128239	FN1,NCKAP1L,ITGAD,ITGAM,ITGAV,ITGAX,ITGB2,KNG1,VAV1,CXCR4,IQGAP3
17_Summary	GO Biological Processes	GO:0098609	cell-cell adhesion	-7.36814	-4.79648	29/352	101,214,1009,1192,1545,2243,2244,2266,2335,2650,3681,3684,3685,3687,3689,4897,5099,5341,5788,6280,6614,6850,7070,7373,8832,10082,23654,23705,140885	ADAM8,ALCAM,CDH11,CLIC1,CYP1B1,FGA,FGB,FGG,FN1,GCNT1,ITGAD,ITGAM,ITGAV,ITGAX,ITGB2,NRCAM,PCDH7,PLEK,PTPRC,S100A9,SIGLEC1,SYK,THY1,COL14A1,CD84,GPC6,PLXNB2,CADM1,SIRPA
17_Member	GO Biological Processes	GO:0098609	cell-cell adhesion	-7.36814	-4.79648	29/352	101,214,1009,1192,1545,2243,2244,2266,2335,2650,3681,3684,3685,3687,3689,4897,5099,5341,5788,6280,6614,6850,7070,7373,8832,10082,23654,23705,140885	ADAM8,ALCAM,CDH11,CLIC1,CYP1B1,FGA,FGB,FGG,FN1,GCNT1,ITGAD,ITGAM,ITGAV,ITGAX,ITGB2,NRCAM,PCDH7,PLEK,PTPRC,S100A9,SIGLEC1,SYK,THY1,COL14A1,CD84,GPC6,PLXNB2,CADM1,SIRPA
17_Member	GO Biological Processes	GO:0098742	cell-cell adhesion via plasma-membrane adhesion molecules	-2.07806	-0.680122	9/134	214,1009,3684,3689,5099,8832,10082,23654,23705	ALCAM,CDH11,ITGAM,ITGB2,PCDH7,CD84,GPC6,PLXNB2,CADM1
18_Summary	GO Biological Processes	GO:0032102	negative regulation of response to external stimulus	-7.24793	-4.72644	27/315	2,335,350,383,727,1843,2243,2244,2266,3273,3827,3949,4321,4852,5340,5345,5624,5788,6696,6850,7448,10203,54209,84868,135228,140885,284207,101,197,3075,3263,3371,4153,5743,6280,6688,7099,7305,7409,8792,11117,23705,51284,51311,81792,84699,118788	A2M,APOA1,APOH,ARG1,C5,DUSP1,FGA,FGB,FGG,HRG,KNG1,LDLR,MMP12,NPY,PLG,SERPINF2,PROC,PTPRC,SPP1,SYK,VTN,CALCRL,TREM2,HAVCR2,CD109,SIRPA,METRNL,ADAM8,AHSG,CFH,HPX,TNC,MBL2,PTGS2,S100A9,SPI1,TLR4,TYROBP,VAV1,TNFRSF11A,EMILIN1,CADM1,TLR7,TLR8,ADAMTS12,CREB3L3,PIK3AP1
18_Member	GO Biological Processes	GO:0032102	negative regulation of response to external stimulus	-7.24793	-4.72644	27/315	2,335,350,383,727,1843,2243,2244,2266,3273,3827,3949,4321,4852,5340,5345,5624,5788,6696,6850,7448,10203,54209,84868,135228,140885,284207	A2M,APOA1,APOH,ARG1,C5,DUSP1,FGA,FGB,FGG,HRG,KNG1,LDLR,MMP12,NPY,PLG,SERPINF2,PROC,PTPRC,SPP1,SYK,VTN,CALCRL,TREM2,HAVCR2,CD109,SIRPA,METRNL
18_Member	GO Biological Processes	GO:0031347	regulation of defense response	-6.49334	-4.16599	34/501	2,101,197,335,383,3075,3263,3371,3949,4153,4321,4852,5624,5743,5788,6280,6688,6850,7099,7305,7409,8792,10203,11117,23705,51284,51311,54209,81792,84699,84868,118788,140885,284207	A2M,ADAM8,AHSG,APOA1,ARG1,CFH,HPX,TNC,LDLR,MBL2,MMP12,NPY,PROC,PTGS2,PTPRC,S100A9,SPI1,SYK,TLR4,TYROBP,VAV1,TNFRSF11A,CALCRL,EMILIN1,CADM1,TLR7,TLR8,TREM2,ADAMTS12,CREB3L3,HAVCR2,PIK3AP1,SIRPA,METRNL
18_Member	GO Biological Processes	GO:0050727	regulation of inflammatory response	-4.42657	-2.52644	21/299	101,197,335,3371,3949,4852,5624,5743,5788,6280,6850,7099,8792,10203,51284,54209,81792,84699,118788,140885,284207	ADAM8,AHSG,APOA1,TNC,LDLR,NPY,PROC,PTGS2,PTPRC,S100A9,SYK,TLR4,TNFRSF11A,CALCRL,TLR7,TREM2,ADAMTS12,CREB3L3,PIK3AP1,SIRPA,METRNL
18_Member	GO Biological Processes	GO:0031348	negative regulation of defense response	-3.16404	-1.52853	14/198	2,335,383,3949,4321,4852,5624,5788,6850,10203,54209,84868,140885,284207	A2M,APOA1,ARG1,LDLR,MMP12,NPY,PROC,PTPRC,SYK,CALCRL,TREM2,HAVCR2,SIRPA,METRNL
18_Member	GO Biological Processes	GO:0050728	negative regulation of inflammatory response	-2.83001	-1.26538	10/124	335,3949,4852,5624,5788,6850,10203,54209,140885,284207	APOA1,LDLR,NPY,PROC,PTPRC,SYK,CALCRL,TREM2,SIRPA,METRNL
19_Summary	Reactome Gene Sets	R-HSA-198933	Immunoregulatory interactions between a Lymphoid and a non-Lymphoid cell	-7.10833	-4.62462	12/64	1277,1278,1281,3689,6614,7305,11006,11025,54209,81035,124599,100131439,899,929,1513,2243,2244,2266,2533,3685,3832,4360,5788,5795,6280,6850,7099,7409,10437,11059,29127,29760,84617,118788	COL1A1,COL1A2,COL3A1,ITGB2,SIGLEC1,TYROBP,LILRB4,LILRB3,TREM2,COLEC12,CD300LB,CD300LD,CCNF,CD14,CTSK,FGA,FGB,FGG,FYB1,ITGAV,KIF11,MRC1,PTPRC,PTPRJ,S100A9,SYK,TLR4,VAV1,IFI30,WWP1,RACGAP1,BLNK,TUBB6,PIK3AP1
19_Member	Reactome Gene Sets	R-HSA-198933	Immunoregulatory interactions between a Lymphoid and a non-Lymphoid cell	-7.10833	-4.62462	12/64	1277,1278,1281,3689,6614,7305,11006,11025,54209,81035,124599,100131439	COL1A1,COL1A2,COL3A1,ITGB2,SIGLEC1,TYROBP,LILRB4,LILRB3,TREM2,COLEC12,CD300LB,CD300LD
19_Member	Reactome Gene Sets	R-HSA-1280218	Adaptive Immune System	-4.33582	-2.45236	34/630	899,929,1277,1278,1281,1513,2243,2244,2266,2533,3685,3689,3832,4360,5788,5795,6280,6614,6850,7099,7305,7409,10437,11006,11025,11059,29127,29760,54209,81035,84617,118788,124599,100131439	CCNF,CD14,COL1A1,COL1A2,COL3A1,CTSK,FGA,FGB,FGG,FYB1,ITGAV,ITGB2,KIF11,MRC1,PTPRC,PTPRJ,S100A9,SIGLEC1,SYK,TLR4,TYROBP,VAV1,IFI30,LILRB4,LILRB3,WWP1,RACGAP1,BLNK,TREM2,COLEC12,TUBB6,PIK3AP1,CD300LB,CD300LD
20_Summary	Reactome Gene Sets	R-HSA-3000480	Scavenging by Class A Receptors	-6.92693	-4.47125	7/17	335,338,1277,1278,1281,4481,81035,259,3263	APOA1,APOB,COL1A1,COL1A2,COL3A1,MSR1,COLEC12,AMBP,HPX
20_Member	Reactome Gene Sets	R-HSA-3000480	Scavenging by Class A Receptors	-6.92693	-4.47125	7/17	335,338,1277,1278,1281,4481,81035	APOA1,APOB,COL1A1,COL1A2,COL3A1,MSR1,COLEC12
20_Member	Reactome Gene Sets	R-HSA-2173782	Binding and Uptake of Ligands by Scavenger Receptors	-6.60165	-4.23742	9/36	259,335,338,1277,1278,1281,3263,4481,81035	AMBP,APOA1,APOB,COL1A1,COL1A2,COL3A1,HPX,MSR1,COLEC12
20_Member	Reactome Gene Sets	R-HSA-2168880	Scavenging of heme from plasma	-2.73771	-1.20339	3/10	259,335,3263	AMBP,APOA1,HPX
