# Supplementary material
Source: publisher figshare collection journal article supplement (https://diabetesjournals.figshare.com/articles/dataset/_/21035914)
Supplement: Supplementary file 1 [file 1]

## Supplemental material

### Supplemental figures

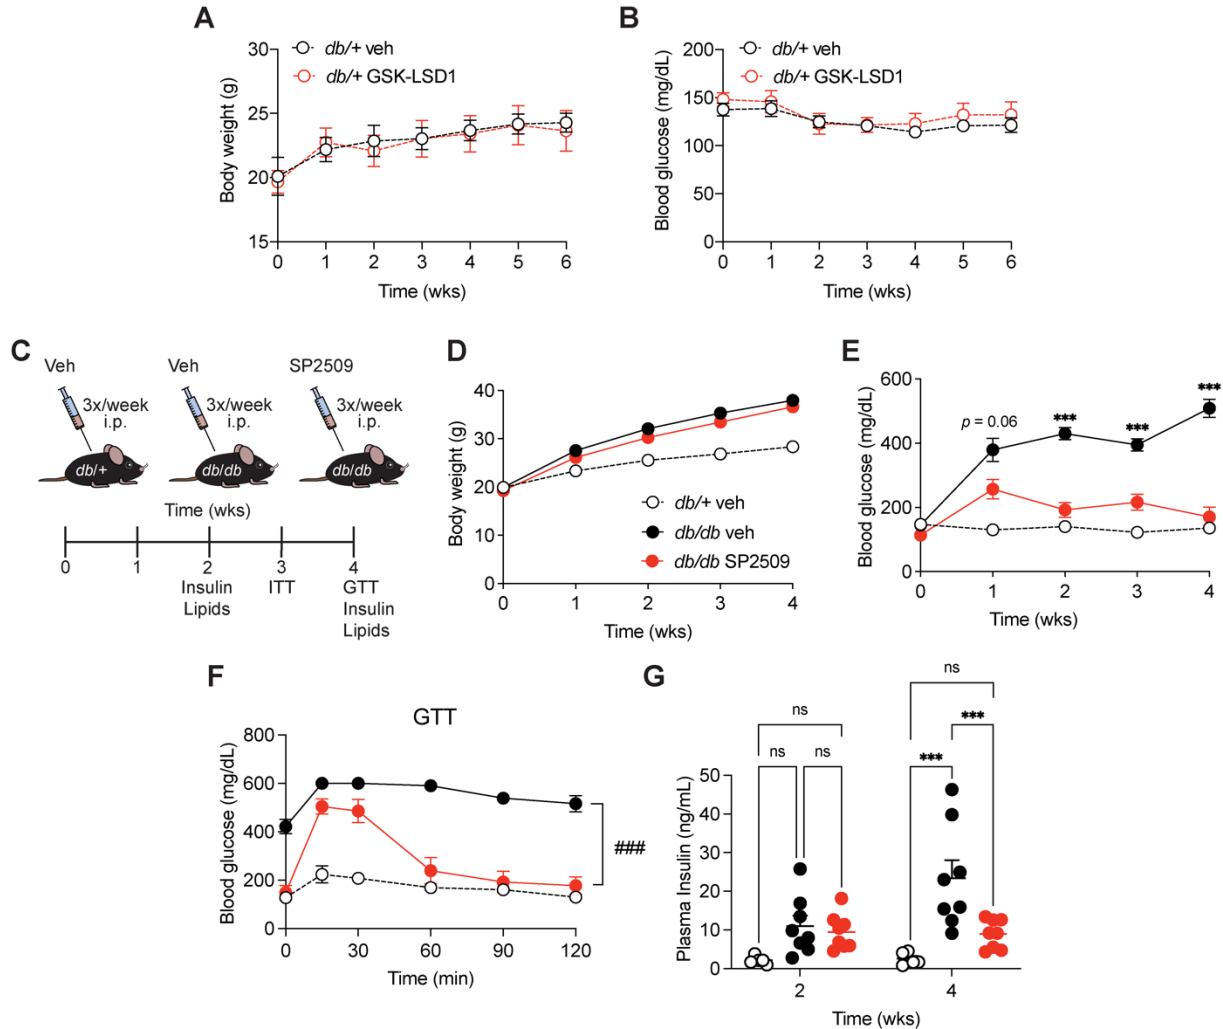

**Figure S1. The structurally and mechanistically distinct LSD1 inhibitor SP2509 recapitulates effects of GSK-LSD1 on glucose homeostasis in *db/db* mice** (A) Body weight and (B) blood glucose levels in 4-week-old male and female lean *db/+* mice treated with GSK-LSD1 or vehicle (veh), respectively, for 6 weeks ( $n = 6$  mice/group). (C-G) 4-week-old male and female *db/db* mice received SP2509 or vehicle (veh) thrice weekly via intraperitoneal injections for 4 weeks. As a control, lean *db/+* mice were injected with veh. Metabolic measurements were conducted at the indicated time points. (D) Body weight and (E) blood glucose levels measured weekly ( $n = 5-8$  mice/group). (F) Blood glucose levels at indicated time points after a glucose bolus via oral gavage ( $n = 5-8$  mice/group). Glucose tolerance test, GTT. (G) Fasting plasma insulin levels after 2 and 4 weeks of SP2509 or veh treatment ( $n = 5-8$  mice/group). Data are shown as mean  $\pm$  SEM. Statistical differences were calculated using a two-way ANOVA with Tukey post hoc analysis. \*\*\* $p < 0.001$ , ### $p < 0.001$ , ns, not significant.

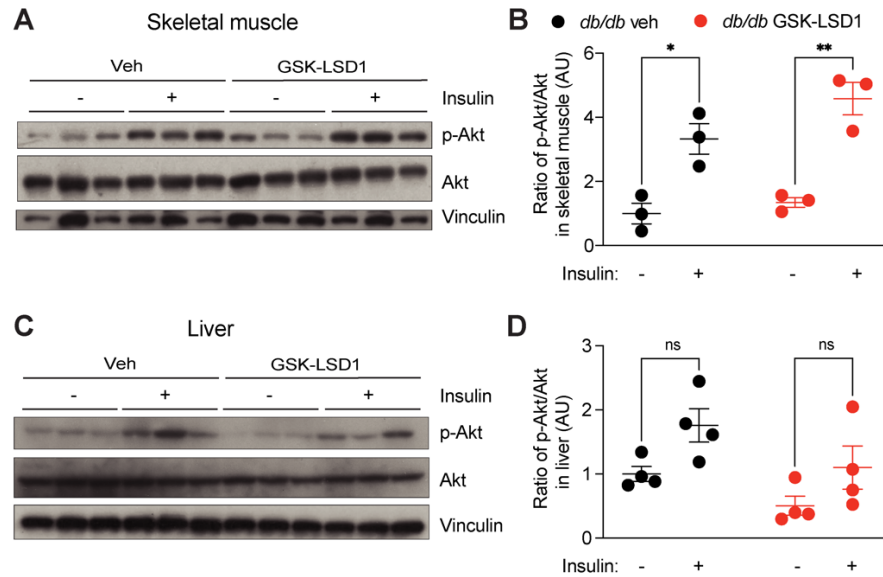

**Figure S2. Impact of LSD1 inhibition on insulin sensitivity in peripheral tissues. (A-D)** Immunoblot analysis of pAkt<sup>Ser473</sup>, Akt, and vinculin in (A) skeletal muscle (n = 3 mice/group) and (C) liver (n = 4 mice/group). Quantification of pAkt<sup>Ser473</sup> to Akt ratio as fold change compared to veh-treated mice without insulin injection in skeletal muscle (B) and liver (D). Data are shown as mean ± SEM. Statistical differences were calculated using a two-way ANOVA with Tukey post hoc analysis. \* $p < 0.05$ , \*\* $p < 0.01$ . AU, arbitrary units, ns, not significant.

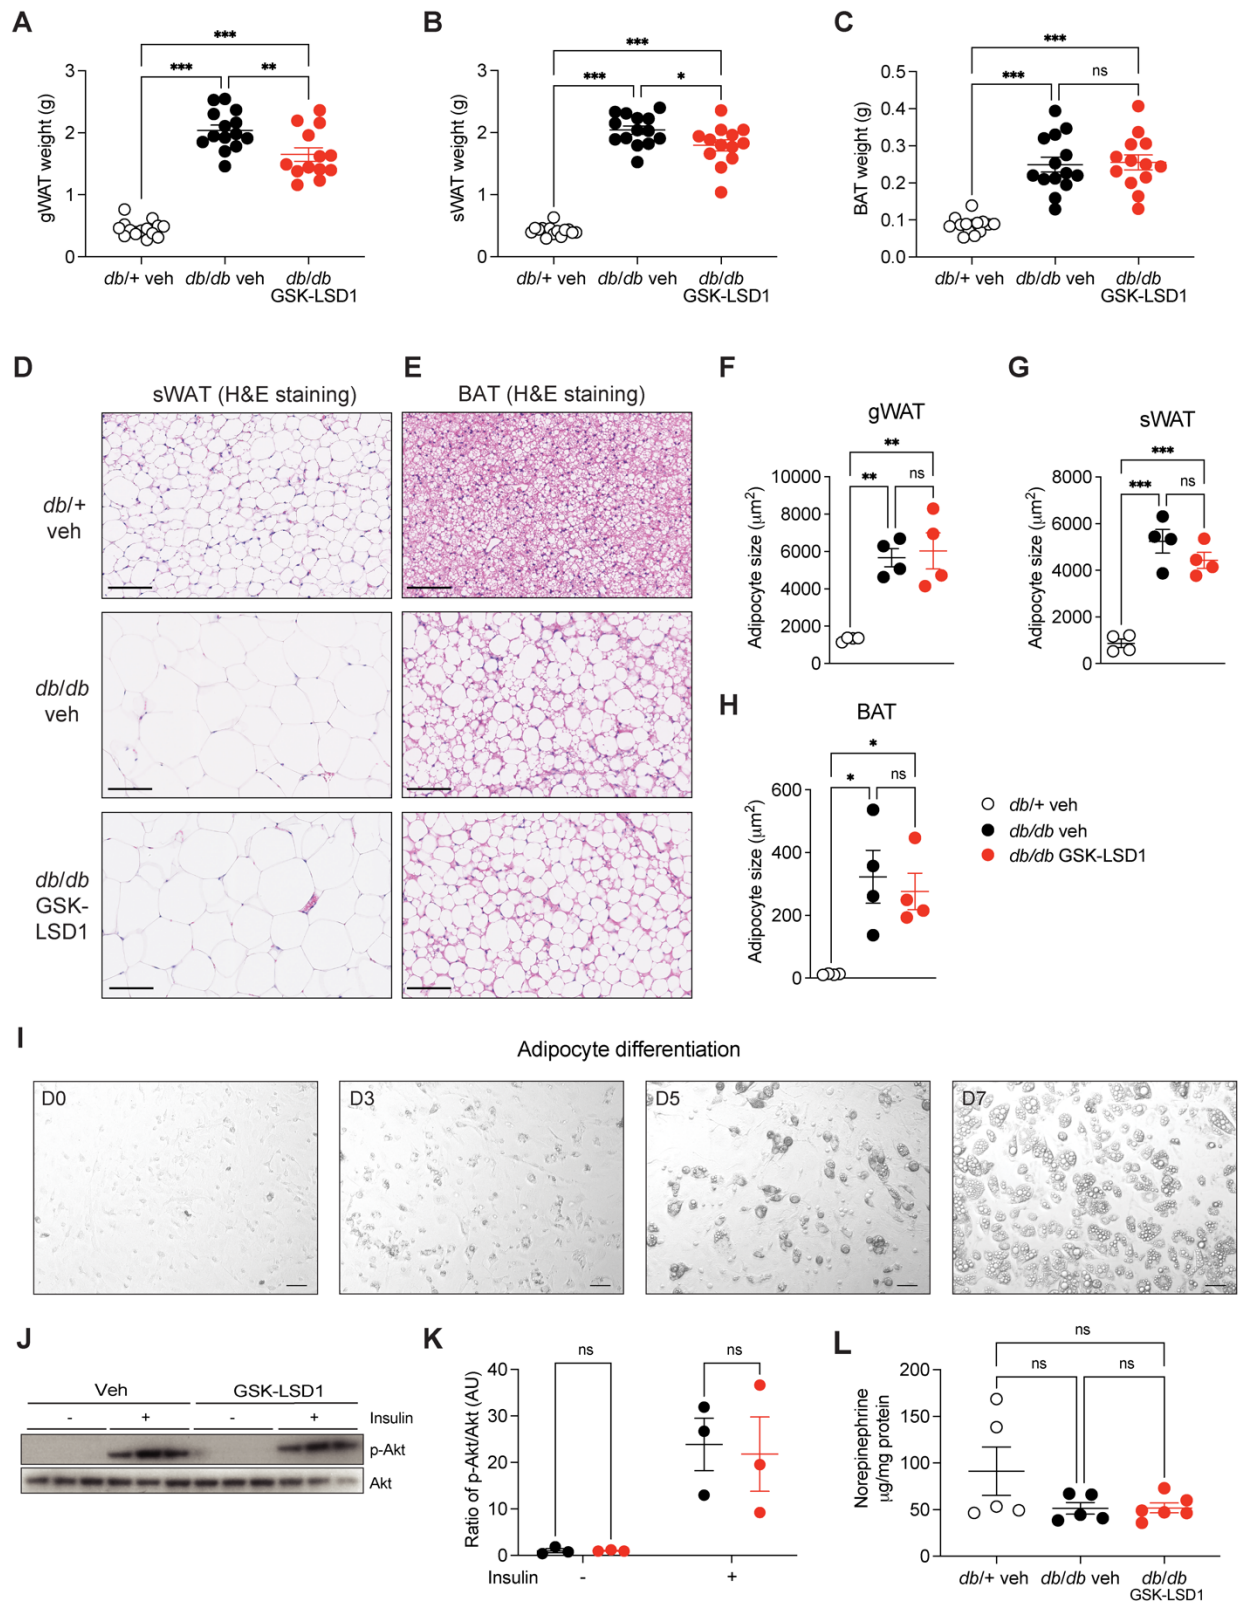

**Figure S3. Impact of LSD1 inhibition on adipose tissue.** (A-H) 4-week-old male and female *db/db* mice received daily intraperitoneal (i.p.) injections of GSK-LSD1 or vehicle (veh) for 6 weeks. As a control, lean *db/+* mice were injected with veh. Tissue weight of (A) gWAT, (B)

sWAT, and (C) BAT (n = 13-14 mice/group). (D) Representative images of sWAT and (E) BAT sections stained with hematoxylin and eosin (H&E). Scale bars = 100  $\mu$ m. (F) Adipocyte size quantified in gWAT, (G) sWAT, and (H) BAT (n = 4 mice/group). (I) Adipocytes were isolated from 5-week-old *db/db* mice. Representative images of adipocyte differentiation at day 0, 3, 5, and 7. Scale bars = 200  $\mu$ m. (J) Immunoblot analysis of pAkt<sup>Ser473</sup> and Akt in differentiated adipocytes isolated from *db/db* mice after preincubation with GSK-LSD1 or veh and stimulation with insulin (n = 3 mice). (K) Quantification of pAkt<sup>Ser473</sup> to Akt ratio as fold change compared to veh-treated adipocytes. (L) WAT norepinephrine levels after 6 weeks of GSK-LSD1 or veh treatment of *db/db* mice or lean *db/+* control mice (n = 5-6 mice/group). Data presented as mean  $\pm$  SEM. A one-way ANOVA with Tukey post hoc analysis was performed to analyze statistical differences between three or more groups. \* $p$ <0.05, \*\* $p$ <0.01, \*\*\* $p$ <0.001, ns, not significant.

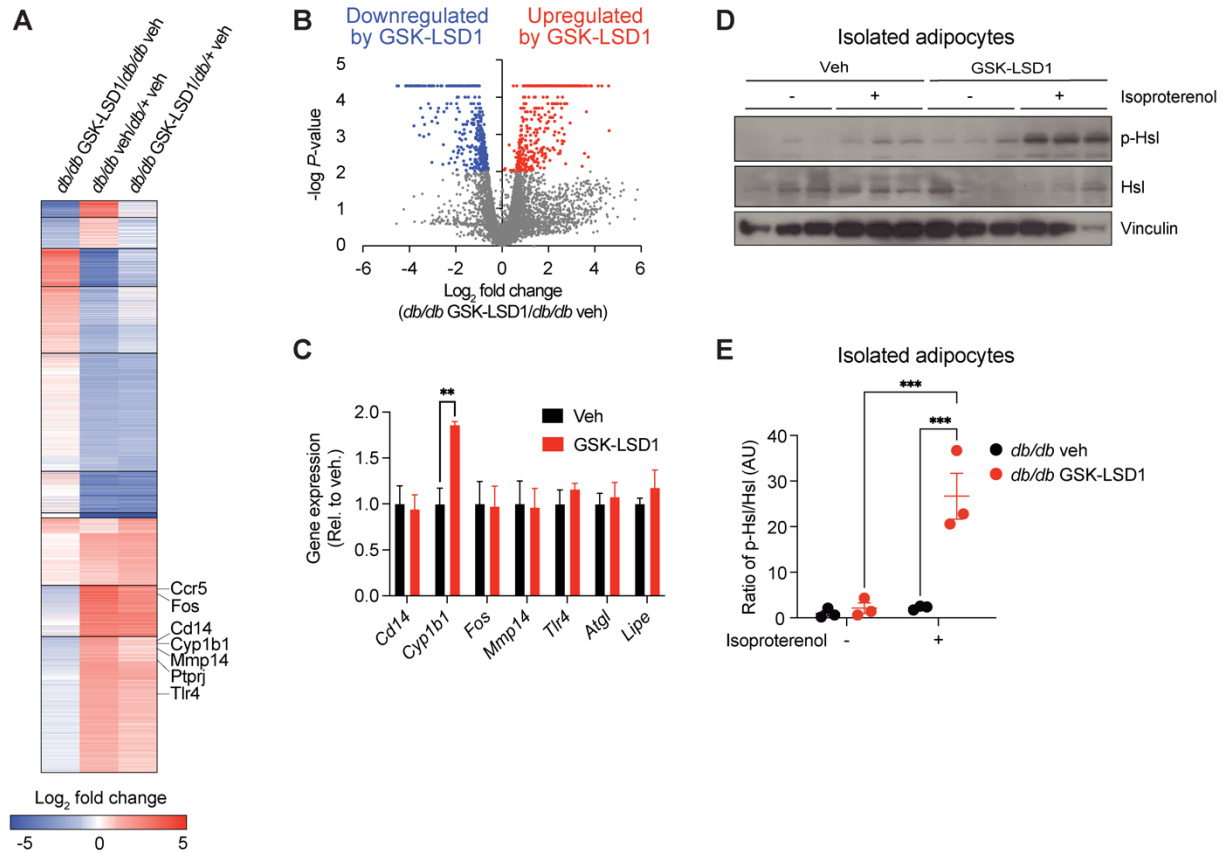

**Figure S4. LSD1 inhibition in vivo reverses a subset of the effects of obesity on the gWAT transcriptome.** (A) K-means clustering of log<sub>2</sub> fold changes in mRNA levels in gWAT following 6 weeks of GSK-LSD1 treatment of male and female *db/db* mice, veh treatment of *db/db* mice, or veh treatment of *db/+* mice for the indicated comparisons. mRNAs differentially expressed in at least one pairwise comparison ( $p < 0.01$  by Cuffdiff) were used for clustering ( $n = 4$  mice/group). (B) Volcano plot comparing mRNA levels in gWAT following GSK-LSD1 or veh treatment of *db/db* mice. Differentially expressed genes ( $p < 0.01$  by Cuffdiff) are indicated in red or blue. (C) Networks of genes upregulated (network nodes in red) or downregulated (network nodes in blue) by GSK-LSD1 compared to vehicle ( $p < 0.01$  by Cuffdiff) in gWAT from *db/db* mice following 6 weeks of treatment, shown as clustered functional categories ( $n = 4$  mice/group). (D) qPCR of select inflammation genes downregulated by GSK-LSD1 from (A) as well as the lipolysis enzyme genes Atgl and Lipe (encoding Hsl) in differentiated adipocytes isolated from *db/db* mice after preincubation with GSK-LSD1 or veh. (E) Immunoblot analysis of p-Hsl<sup>Ser660</sup>, Hsl, and vinculin in differentiated adipocytes isolated from *db/db* mice after preincubation with GSK-LSD1 or veh and stimulation with isoproterenol. (F) Quantification of p-Hsl<sup>Ser660</sup> to Hsl ratio as fold change compared to veh-treated adipocytes without isoproterenol. Data are shown as mean  $\pm$  SEM. Statistical differences were calculated using Cuffdiff (B), multiple t-tests (C), or two-way ANOVA with Tukey post hoc analysis (E). \*\* $p < 0.01$ , \*\*\* $p < 0.001$ . AU, arbitrary units.

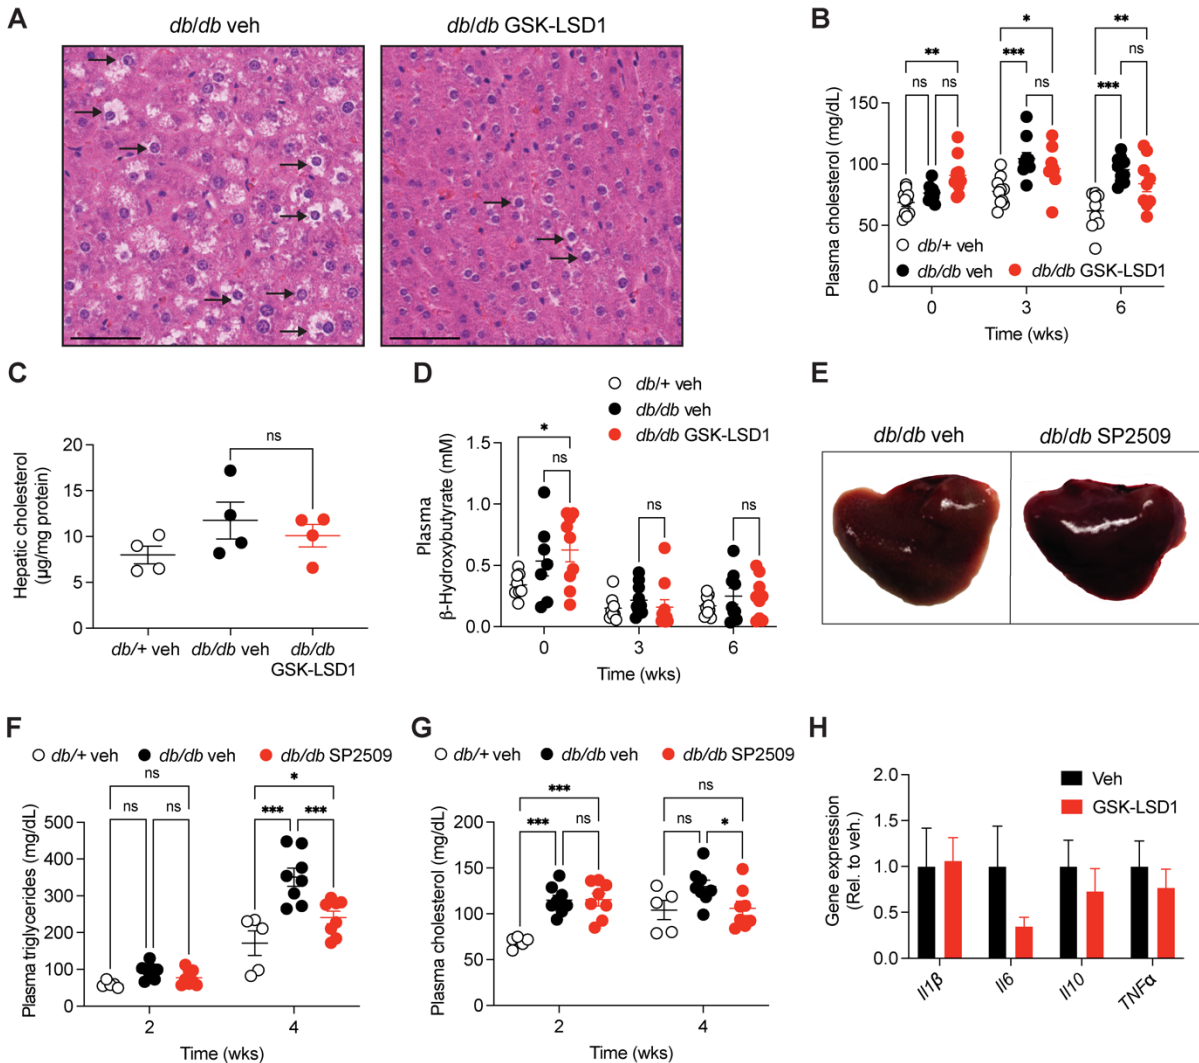

**Figure S5. Plasma and hepatic metabolites in *db/db* mice.** (A) 4-week-old male and female *db/db* mice received daily intraperitoneal injections of GSK-LSD1 or vehicle (veh) for 6 weeks. Representative images of H&E stains of livers. Examples of microvesicular steatosis are highlighted with an arrow. Scale bars = 50 μm. (B) Fasting plasma cholesterol levels at indicated time points (n = 9-10 mice/group). (C) Hepatic cholesterol levels (n = 4 mice/group). (D) Plasma β-hydroxybutyrate levels at indicated time points (n = 7-10 mice/group). (E-G) 4-week-old male and female *db/db* mice received SP2509 or vehicle (veh) thrice weekly via intraperitoneal injections for 4 weeks. As a control, lean *db/+* mice were injected with veh. (E) Representative images of livers of *db/db* mice treated with SP2509 or vehicle (veh). (F) Fasting plasma triglyceride and (G) cholesterol levels at indicated time points (n = 5-8 mice/group). (H) qPCR analysis of inflammatory genes in liver. Transcript levels in GSK-LSD1-treated relative to veh-treated *db/db* mice (n = 6-8 mice/group). Data are shown as mean ± SEM. Statistical differences were calculated using multiple t-tests (H), a one-way ANOVA (C) or two-way ANOVA (B, D, F, G) with Tukey post hoc analysis. \*p<0.05, \*\*p<0.01, \*\*\*p<0.001, ns, not significant.

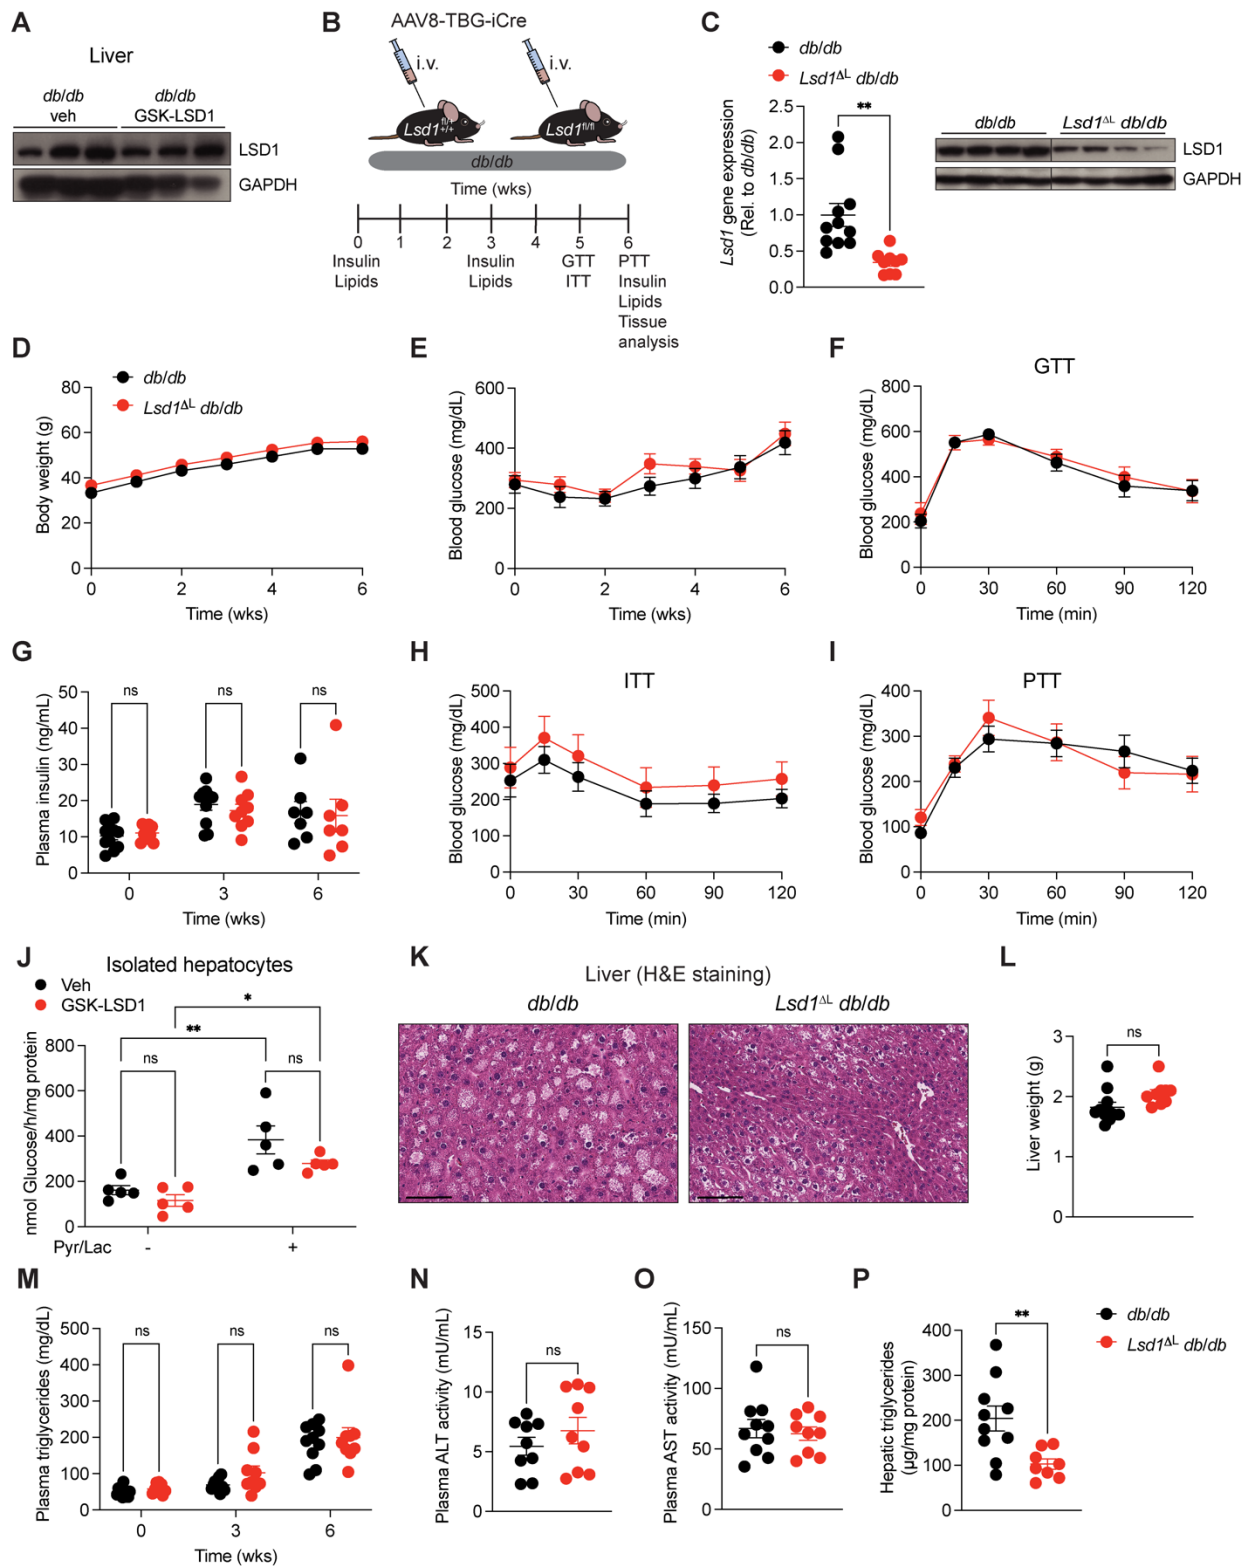

**Figure S6: Hepatocyte-specific *Lsd1* deletion does not improve metabolic health in *db/db* mice.** (A) Immunoblot analysis of LSD1 and GAPDH in the liver of GSK-LSD1- or vehicle (veh)-treated male and female *db/db* mice (n = 3 mice/group). (B) 5-week-old male and female *Lsd1<sup>ΔL</sup>db/db* or control (*Lsd1<sup>fl/+</sup>db/db* and *Lsd1<sup>+/+</sup>db/db*) mice were intravenously injected with

AAV8-TBG-iCre virus for hepatocyte-specific *Lsd1* deletion (hereafter referred to as *Lsd1<sup>Δ</sup>db/db* mice). (C) qPCR analysis of *Lsd1* in livers of *Lsd1<sup>Δ</sup>db/db* mice (left). Transcript levels relative to *db/db* control mice. (n = 9-11 mice/group). Immunoblot analysis of LSD1 and GAPDH in the liver of *Lsd1<sup>Δ</sup>db/db* and control mice (right). The lanes were run on the same gel but were noncontiguous (n = 4 mice/group). (D) Body weight and (E) blood glucose levels measured weekly (n = 9-11 mice/group). (F) Blood glucose levels at indicated time points after a glucose bolus via oral gavage (n = 9-11 mice/group). Glucose tolerance test, GTT. (G) Fasting plasma insulin levels at baseline and after 3 and 6 weeks of GSK-LSD1 or veh treatment (n = 9-11 mice/group for week 0 and 3, n = 7 mice/group for week 6). (H) Blood glucose levels at indicated time points after intraperitoneal insulin (2.0 U/kg body weight) injection (n = 9-11 mice/group). Insulin tolerance test, ITT. (I) Blood glucose levels at indicated time points after intraperitoneal pyruvate injection (n = 9-11 mice/group). Pyruvate tolerance test, PTT. (J) Glucose production in hepatocytes isolated from 5-week-old *db/db* mice after preincubation with GSK-LSD1 or veh overnight. Glucose release into the medium was measured after 2 hours of pyruvate and lactate stimulation (n = 5 mice). (K) Representative images of liver sections stained with hematoxylin and eosin (H&E). Scale bars = 100  $\mu$ m (n = 5-7 mice/group). (L) Liver weight (n = 9-11 mice/group). (M) Fasting plasma triglyceride levels at indicated time points. (N) Plasma ALT and (O) AST activity (n = 9-11 mice/group). (P) Hepatic triglyceride levels (n = 8-10 mice/group). Data are shown as mean  $\pm$  SEM. Statistical differences were calculated using an unpaired Student's t-test (L, O-P) or two-way ANOVA (D-J, M) with Tukey post hoc analysis. \* $p$ <0.05, \*\* $p$ <0.01, \*\*\* $p$ <0.001, ns, not significant.

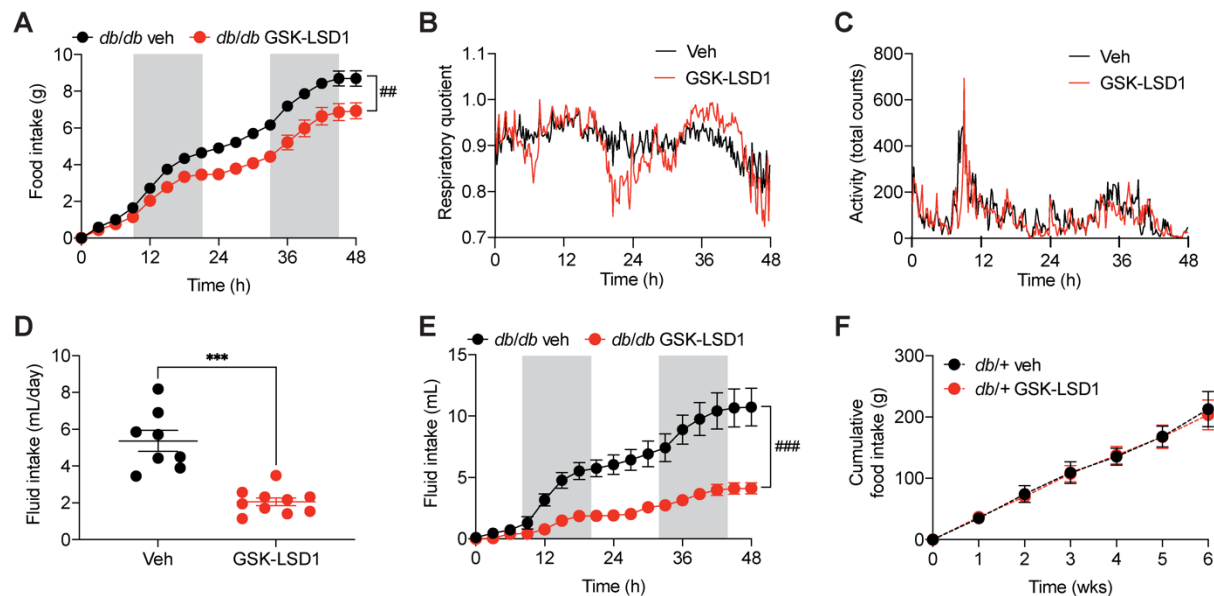

**Figure S7. LSD1 inhibition does not alter energy expenditure in *db/db* mice.** (A) Male and female *db/db* mice were injected daily with GSK-LSD1 or vehicle (veh) for 5 weeks and then placed into metabolic cages. Using the Comprehensive Laboratory Monitoring System (CLAMS), food intake was monitored and is shown as additive food intake over 48 hours (n = 4-5 mice/group). (B) Respiratory quotient over the course of 48 hours (n = 4-5 mice/group). (C) Spontaneous motor activity along the X-, Y-, and Z- axis with IR photocells (n = 4-5 mice/group). (D) Daily water consumption (n = 4-5 mice/group/day) and (E) Cumulative water consumption (n = 4-5 mice/group). (F) Cumulative food intake in lean *db/+* mice treated with GSK-LSD1 or veh for 6 weeks (n = 3 cages/group, total n = 7-9 mice/group). Data presented as mean  $\pm$  SEM. Statistical differences were calculated using an unpaired Student's t-test (C) or two-way ANOVA (A, B, D-F) with Tukey post hoc analysis. \* $p < 0.05$ , \*\* $p < 0.01$ , \*\*\* $p < 0.001$ .

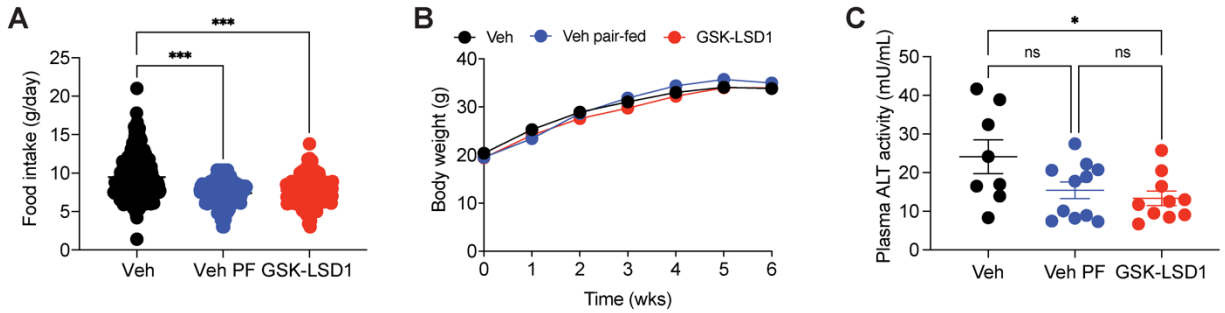

**Figure S8. Metabolic parameters of pair-feeding study in *db/db* mice.** (A) 4-week-old male and female *db/db* mice were injected daily with vehicle (veh) or GSK-LSD1 for 6 weeks and fed a normal chow diet ad libitum. A third group of mice received veh and was pair-fed to GSK-LSD1-treated mice. Food intake was measured daily (n = 8-11 mice/group/day). (B) Body weight measured weekly (n = 8-11 mice/group). (C) Plasma ALT activity (n = 8-11 mice/group). Data presented as mean  $\pm$  SEM. Statistical differences were calculated using a one-way ANOVA (A, D) or two-way ANOVA (B, C) with Tukey post hoc analysis. \* $p < 0.05$ , \*\* $p < 0.01$ , \*\*\* $p < 0.001$ , ns, not significant.

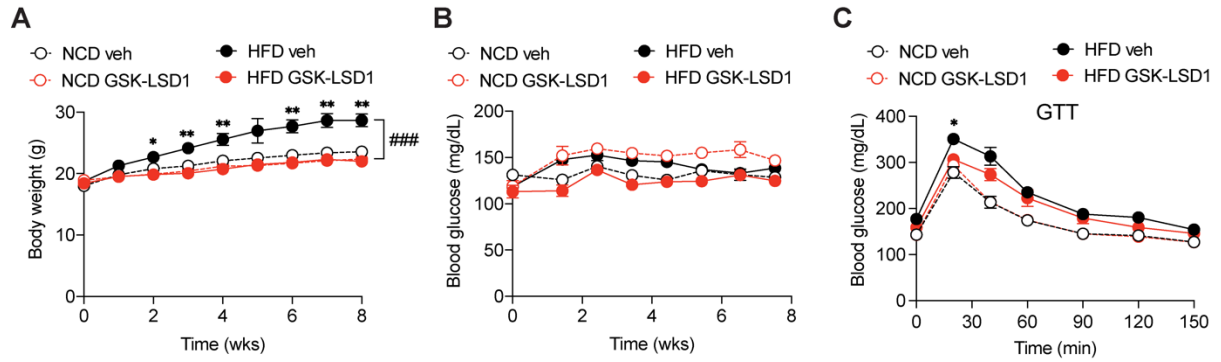

**Figure S9. LSD1 inhibition prevents weight gain in high fat diet-fed mice.** (A) 10-week-old male C57BL/6J *wild type* (WT) mice were fed a high fat diet (HFD) or normal chow diet (NCD) for 8 weeks and injected daily with GSK-LSD1 or vehicle (veh). (B) Body weight and (C) blood glucose levels measured weekly (n = 8 mice/group). Asterisks indicate statistical differences between HFD GSK-LSD1- and HFD veh-treated mice. (C) Blood glucose levels after 7 weeks of treatment at indicated time points after a glucose bolus via oral gavage (n = 8 mice/group). Glucose tolerance test, GTT. Asterisk indicates statistical difference between HFD GSK-LSD1 and HFD veh mice. Data presented as mean  $\pm$  SEM. A two-way ANOVA with Tukey post hoc analysis was performed to determine statistical differences. \* $p < 0.05$ , \*\* $p < 0.01$ , ### $p < 0.001$ .

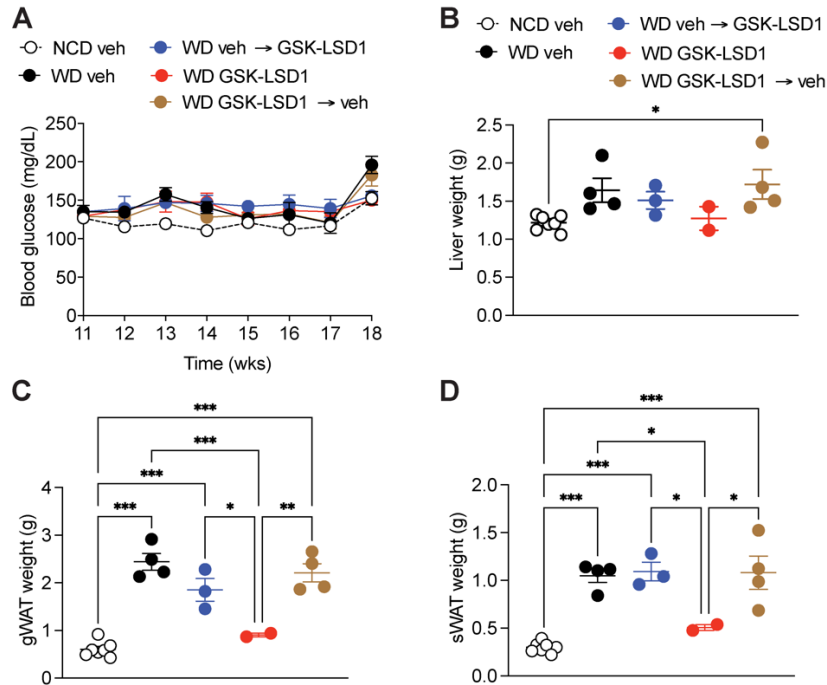

**Figure S10. The effect of GSK-LSD1 on body weight in Western diet-fed mice is reversible.** (A) 10-week-old male C57BL/6J mice fed a Western diet (WD) were injected daily with GSK-LSD1 or vehicle (veh) for 11 weeks. As a control, a group of mice received veh and was kept on a normal chow diet (NCD). After 11 weeks of veh administration, the veh group was split into one group continuing veh administration (black), whereas the other half began to receive GSK-LSD1 daily for another 7 weeks (blue). Likewise, the GSK-LSD1 group was split into one group continuing GSK-LSD1 administration after 11 weeks (red), whereas the other half began to receive veh daily for another 7 weeks (brown). Blood glucose levels were measured weekly (NCD veh:  $n = 7$  mice, WD groups:  $n = 4$  mice). (B-D) Tissue weights for (B) liver, (C) gWAT, and (D) sWAT ( $n = 2-7$  mice/group). Data are shown as mean  $\pm$  SEM. Statistical differences were calculated using a two-way ANOVA (A-D) with Tukey post hoc analysis.  $*p < 0.05$ ,  $**p < 0.01$ ,  $***p < 0.001$ .

**Supplemental Table S1.** List of quantitative PCR primers.

| <b>Gene</b>   | <b>Forward Primer</b>                | <b>Reverse Primer</b>                 |
|---------------|--------------------------------------|---------------------------------------|
| <i>Acc1</i>   | 5'-CTTCCTGACAAACGAGTCTGG-<br>3'      | 5'-CTGCCGAAACATCTCTGGGA-3'            |
| <i>Atgl</i>   | 5'-AACACCAGCATCCAGTTCAA-3'           | 5'-GGTTCAGTAGGCCATTCTC-3'             |
| <i>Ccl2</i>   | 5'-CTCAGCCAGATGCAGTTAACG-<br>3'      | 5'-<br>AAACTACAGCTTCTTTGGGACAC-<br>3' |
| <i>Cd14</i>   | 5'-GCCTTTCTCGGAGCCTATCT-3'           | 5'-TGGCTTCGGATCTGAGAAGT-3'            |
| <i>Cd36</i>   | 5'-GAATTAGAACCGGGCCACGTA-<br>3'      | 5'-CAGCCAGGACTGCACCAATA-3'            |
| <i>Cyp1b1</i> | 5'-TCCTCTCTGCCGAAAAGAAA-3'           | 5'-ACAACCTGGTCCAACTCAGC-3'            |
| <i>Elovl6</i> | 5'-<br>GAAAAGCAGTTCAACGAGAACG-<br>3' | 5'-AGATGCCGACCACCAAAGATA-<br>3'       |
| <i>Fabp1</i>  | 5'-TGTGGTCAGCTGTGGAAAGG-3'           | 5'-CGGGCAGACCTATTGCCTTC-3'            |
| <i>Fasn</i>   | 5'-GGAGGTGGTGATAGCCGGTAT-<br>3'      | 5'-TGGGTAATCCATAGAGCCCAG-<br>3'       |
| <i>Fos</i>    | 5'-CGGGTTTCAACGCCGACTA-3'            | 5'-TTGGCACTAGAGACGGACAGA-<br>3'       |

|              |                                       |                                  |
|--------------|---------------------------------------|----------------------------------|
| <i>Il1β</i>  | 5'-<br>GAAATGCCACCTTTTGACAGTG-3'      | 5'-TGGATGCTCTCATCAGGACAG-<br>3'  |
| <i>Il6</i>   | 5'-<br>TAGTCCTTCCTACCCCAATTTC-<br>3'  | 5'-TTGGTCCTTAGCCACTCCTTC-3'      |
| <i>Il10</i>  | 5'-GCTCTTACTGACTGGCATGAG-<br>3-       | 5'-CGCAGCTCTAGGAGCATGTG-3'       |
| <i>Lipe</i>  | 5'-TGGTTCAACTGGAGAGCGGAT-<br>3'       | 5'-TGATGCAGAGATTCCCACCTG-<br>3'  |
| <i>Lsd1</i>  | 5'-GCGCCATGGTCTTATCAACT-3'            | 5'-GCAACTCGTCCACCTACTCG-3'       |
| <i>Mmp14</i> | 5'-AAAGGCGCCCCAAGAGAG-3'              | 5'-GTCCCCTGGAGGTAGGTAGC-3'       |
| <i>Pklr</i>  | 5'-GCCAGCAGGATACCTGAGAC-<br>3'        | 5'-CATCCCTGCCTTGATCATCT-3'       |
| <i>Pparα</i> | 5'-<br>AACATCGAGTGTCGAATATGTGG-<br>3' | 5'-AGCCGAATAGTTCGCCGAAAG-<br>3'  |
| <i>Pparγ</i> | 5'-TCGCTGATGCACTGCCTATG-3'            | 5'-GAGAGGTCCACAGAGCTGATT-<br>3'  |
| <i>Scd1</i>  | 5'-<br>TTCTTGCGATACACTCTGGTGC-3'      | 5'-CGGGATTGAATGTTCTTGTCGT-<br>3' |

|                               |                                 |                                      |
|-------------------------------|---------------------------------|--------------------------------------|
| <i>Tbp</i>                    | 5'-GAAGCTGCGGTACAATTCCAG-<br>3' | 5'-CCCCTTGTACCCTTCACCAAT-3'          |
| <i>Tlr4</i>                   | 5'-GCTCCTGGCTAGGACTCTGA-3'      | 5'-AGAGGTGGTGTAAGCCATGC-3'           |
| <i>Tnf<math>\alpha</math></i> | 5'-CCTGTAGCCACGTCGTAG-3'        | 5'-<br>GGGAGTAGACAAGGTACAACCC-<br>3' |
